# Supplementary material
Source: PubMed Central journal article supplement (PMC5436309)
Supplement: NIHMS300717-supplement-1_si_001.pdf [file NIHMS300717-supplement-1_si_001.pdf]

# Control of Olefin Geometry in Macrocyclic Ring-Closing Metathesis Using a Removable Silyl Group

Yikai Wang, Miguel Jimenez, Anders S. Hansen, Eun-Ang Raiber, Stuart L. Schreiber, and Damian W. Young\*

## Contents:

|      |                                                                                                           |     |
|------|-----------------------------------------------------------------------------------------------------------|-----|
| I.   | Material and Methods.....                                                                                 | S2  |
| II.  | Experimental procedures.....                                                                              | S3  |
|      | A. General procedure for hydrosilylation, ring-closing metathesis, and protodesilylation.....             | S3  |
|      | B. Catalysts screening and reaction condition optimization.....                                           | S4  |
|      | C. Catalyst decomposition studies.....                                                                    | S8  |
|      | D. Study of the influence of silyl groups on the yield of RCM reactions.....                              | S9  |
|      | E. RCM of various vinylsiloxane substrates<br>and protodesilylation of the alkenyl siloxane products..... | S16 |
|      | F. Influence of the silyl group on the specificity and stereoselectivity of RCM reactions.....            | S34 |
| III. | References.....                                                                                           | S48 |
| IV.  | <sup>1</sup> H, <sup>13</sup> C spectra.....                                                              | S49 |

Full reference 14b: Paone, D. V.; Shaw, A. W.; Nguyen, D. N.; Burgey, C. S.; Deng, J. Z.; Kane, S. A.; Koblan, K. S.; Salvatore, C. A.; Mosser, S. D.; Johnston, V. K.; Wong, B. K.; Miller-Stein, C. M.; Hershey, J. C.; Graham, S. L.; Vacca, J. P.; Williams, T. M. *J. Med. Chem.* **2007**, *50*, 5564-5567.

Full reference 22: Marcaurelle, L. A.; Comer, E.; Dandapani, S.; Duvall, J. R.; Gerard, B.; Kesavan, S.; Lee, M. D.; Liu, H.; Lowe, J. T.; Marie, J.-C.; Mulrooney, C. A.; Pandya, B. A.; Rowley, A.; Ryba, T. D.; Suh, B.-C.; Wei, J.; Young, D. W.; Akella, L. B.; Ross, N. T.; Zhang, Y.-L.; Fass, D. M.; Reis, S. A.; Zhao, W.-N.; Haggarty, S. J.; Palmer, M.; Foley, M. A. *J. Am. Chem. Soc.* **2010**, *132*, 16962-16976.

## Material and Methods.

Except as otherwise noted, reactions were carried out under argon. All reaction solvents except acetone and pyridine were dispensed from a solvent purification system wherein solvents are passed through a packed activated alumina column. Acetone was Aldrich 99.5+% histological grade. Pyridine was Aldrich 99.8% histological grade. NMR spectra were recorded at 500 MHz using a Varian I-500 instrument. Chemical shifts for proton NMR spectra are reported in parts per million downfield from tetramethylsilane and were referenced to residual protonated solvent ( $\text{CHCl}_3$ :  $\delta$  7.26,  $\text{C}_6\text{H}_6$ :  $\delta$  7.15). Chemical shifts for carbon NMR spectra are reported in parts per million downfield from tetramethylsilane and referenced to protonated solvent ( $\text{CHCl}_3$ :  $\delta$  77.0,  $\text{C}_6\text{H}_6$ :  $\delta$  128.0). Data are represented as follows: chemical shift (multiplicity [bs = broad singlet, s = singlet, d = doublet, t = triplet, q = quartet, m = multiplet], coupling constants in Hertz, integration). High-resolution mass spectra were obtained through the Harvard University mass spectrometry facility. Infrared spectra were obtained with a Nicolet IR100 FTIR from Thermo Scientific. Optical rotations were obtained using digital polarimeter Autopol IV (Rudolph research Analytical) with a 1 mL cell and a 1 dm path length. All reactions were magnetically stirred and monitored by thin-layer chromatography (TLC) using E. Merck silica gel 60 F254 precoated plates (0.25 mm). Flash chromatography was performed either with the indicated solvent on E. Merck silica gel 60 (230-400 mesh) or using a CombiFlash companion system (Teledyne ISCO, Inc.) with pre-packed FLASH silica gel columns (Teledyne ISCO, Inc.). SFC/MS chromatography was performed with a Berger analytic SFC (Waters ZQ Mass Spectrometer) using  $\text{CO}_2$  and isopropanol as the mobile phase and using a Chiralpak<sup>®</sup> AD-H column purchased from Chiral Technology Inc. (column length: 4.6x250mm, particle size: 5 $\mu\text{m}$ ). HPLC purification was performed on a Waters mass-directed autopurification system. The system consisted of 2767 injection/collection sample manager, a 2525 binary gradient high pressure LC pump, two 515 pumps to deliver makeup and dilution flow, a column fluidic organizer (CFO), a 2996 photodiode array detector, and a ZQ quadrupole MS equipped with an electrospray interface. All of the instrumentation was controlled by MassLynx and FractionLynx software versions 4.1. All reagents were obtained from commercial sources and used without further purification.

## Experimental Procedures.

### A. General procedures for hydrosilylation, ring-closing metathesis, and protodesilylation.

**Hydrosilylation:** following the literature procedure,<sup>1</sup> to a solution of the alkyne substrate (1 equiv.) in DCM (0.5 M) was added the diethoxymethylsilane (1.1 equiv.). The flask was cooled to 0 °C and catalyst [Cp\*Ru(MeCN)<sub>3</sub>]PF<sub>6</sub> (5 mol%) was added. The ice bath was immediately removed and the solution was stirred for 30 min. The resulting mixture was concentrated under reduced pressure and the residue was purified by silica gel column chromatography using Hexanes/EtOAc as eluent.

**Ring-closing metathesis (RCM) of vinyl siloxane substrates:** substrate (1 equiv.) was dissolved in anhydrous toluene (or other solvent when indicated) at a concentration of 2 mM under argon. 20 mol% catalyst **A** was added to the solution. High vacuum was applied to the reaction flask for 5 min and charged with argon. This operation cycle was repeated for 5 times. The reaction was then heated up to 35 °C and left for 12 hours. The resulting mixture was concentrated under reduced pressure and the residue was analyzed by <sup>1</sup>H NMR or purified by silica gel column chromatography using Hexanes/EtOAc as eluent.

**RCM of simple di-olefinic substrates:** substrate (1 equiv.) was dissolved in anhydrous toluene (or other solvent when indicated) at a concentration of 2 mM under argon. 20 mol% catalyst **A** or 10 mol% Grubbs II, and 20 mol% 1,4-benzoquinone was added to the solution. High vacuum was applied to the reaction flask for 5 min and charged with argon. This operation cycle was repeated for 5 times. The reaction was then heated up to 35 °C and left for 12 hours. The resulting mixture was concentrated under reduced pressure and the residue was analyzed by <sup>1</sup>H NMR or purified by silica gel column chromatography using Hexanes/EtOAc as eluent.

**Protodesilylation:** adapted from the literature procedure,<sup>2</sup> the alkenyl siloxane product (1 equiv.) from the RCM reaction was dissolved in anhydrous THF to a final concentration of 0.25 M. AgF (0.5 equiv.) was added to the solution immediately followed by acetic acid (1.5 equiv.) and TBAF (2.5 equiv., 1 M

solution in THF). The reaction was kept in dark and stirred for 2 hours. The resulting mixture was filtered with celite, concentrated under reduced pressure and the residue was purified by silica gel column chromatography using Hexanes/EtOAc as eluent.

## B. Catalysts screening and reaction conditions optimization.

*Scheme S1.* RCM of model substrate for catalysts screening and reaction conditions optimization.

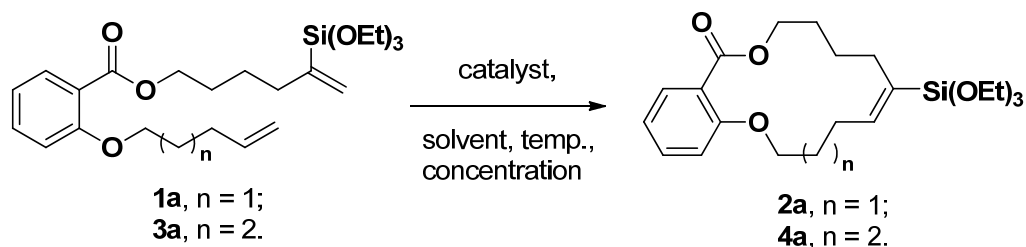

To a round-bottomed flask equipped with magnetic stir bar and armed with a condenser was added substrate **3a** (1.0 equiv.) in anhydrous dichloromethane (2 mM) under argon. The catalyst (0.2 equiv.) was then added and the reaction was refluxed for 18 hours. The mixture was cooled to room temperature, concentrated under reduced pressure. The conversion was analyzed by crude proton NMR study using  $\text{CDCl}_3$  as solvent (**Table S1**). Representative NMR spectrum (olefinic proton area) of the RCM reaction of substrate **3a** with catalyst **A** was shown in **Figure S1**. The peak at 6.23 ppm (t) was the resonance of olefin proton within product **4a** (the overlap of product peak with one of the styrene olefin proton was corrected by subtracting integration of the other styrene olefin proton (6.42-6.39 ppm) from the integration of 6.26-6.20 ppm). Unreacted starting material, acyclic cross-dimers, and the styrene derivative share the common moiety of vinylsiloxane which gives two terminal olefin proton peaks at 5.73 and 5.65 ppm. Integration for one of them and the corrected integration of desired product were then used for determination of the conversion of the reaction.

**Table S1.** Conversion of the RCM reaction of substrate **3a** with various catalysts to desired product.

| Entry    | Catalyst | Conversion to product (%) | Entry    | Catalyst | Conversion to product (%) |
|----------|----------|---------------------------|----------|----------|---------------------------|
| <b>A</b> |          | 19                        | <b>J</b> |          | < 2                       |
| <b>B</b> |          | < 2                       | <b>K</b> |          | < 2                       |
| <b>C</b> |          | < 2                       | <b>L</b> |          | < 2                       |
| <b>D</b> |          | 3                         | <b>M</b> |          | < 2                       |
| <b>E</b> |          | < 2                       | <b>N</b> |          | < 2                       |
| <b>F</b> |          | < 2                       | <b>O</b> |          | < 2                       |
| <b>G</b> |          | < 2                       | <b>P</b> |          | < 2                       |
| <b>H</b> |          | < 2                       | <b>Q</b> |          | < 2                       |
| <b>I</b> |          | < 2                       |          |          |                           |

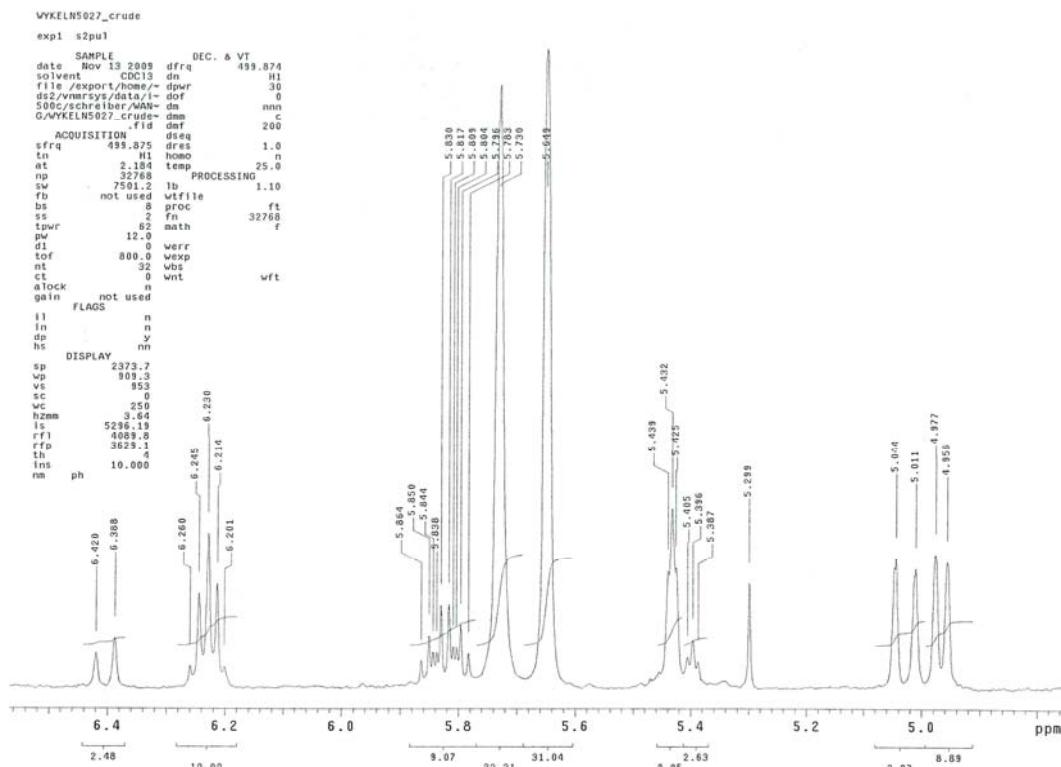

**Figure S1.** Representative crude proton NMR spectrum (olefinic proton area) of RCM reaction for catalysts screening, reaction condition optimization, and catalyst decomposition studies. Reaction condition: substrate **3** with catalyst **A**, DCM, reflux, 18 hours.

Reaction conditions for RCM of substrate **3a** were then optimized (Table **S2**). After varying solvents, temperature, and concentrations we found that optimal results (63%) were obtained using benzene or toluene as a solvent, temperatures of 35 °C and 20-mol% of catalyst.

**Table S2.** Optimization of reaction conditions.

| Entry | Catalyst         | Solv.                             | Temp. (°C) | Conc. (mM) | <sup>1</sup> H NMR yield (%) <sup>[a]</sup> |
|-------|------------------|-----------------------------------|------------|------------|---------------------------------------------|
| 1     | <b>Grubbs I</b>  | CH <sub>2</sub> Cl <sub>2</sub>   | reflux     | 2          | < 2                                         |
| 2     | <b>Grubbs II</b> | CH <sub>2</sub> Cl <sub>2</sub>   | reflux     | 2          | 3                                           |
| 3     | <b>A</b>         | CH <sub>2</sub> Cl <sub>2</sub>   | reflux     | 2          | 19                                          |
| 4     | <b>D</b>         | CH <sub>2</sub> Cl <sub>2</sub>   | reflux     | 2          | 3                                           |
| 5     | <b>A</b>         | (CH <sub>2</sub> Cl) <sub>2</sub> | 50         | 2          | 15                                          |
| 6     | <b>A</b>         | C <sub>6</sub> H <sub>6</sub>     | 50         | 2          | 54                                          |
| 7     | <b>A</b>         | Ph-CH <sub>3</sub>                | 50         | 2          | 50                                          |
| 8     | <b>A</b>         | C <sub>6</sub> H <sub>6</sub>     | 23         | 2          | 42                                          |
| 9     | <b>A</b>         | C <sub>6</sub> H <sub>6</sub>     | 30         | 2          | 63                                          |
| 10    | <b>A</b>         | C <sub>6</sub> H <sub>6</sub>     | 40         | 2          | 63                                          |
| 11    | <b>A</b>         | C <sub>6</sub> H <sub>6</sub>     | 60         | 2          | 45                                          |
| 12    | <b>A</b>         | C <sub>6</sub> H <sub>6</sub>     | 35         | 1          | 52                                          |
| 13    | <b>A</b>         | C <sub>6</sub> H <sub>6</sub>     | 35         | 5          | 39                                          |
| 14    | <b>A</b>         | C <sub>6</sub> H <sub>6</sub>     | 35         | 10         | 20                                          |
| 15    | <b>A</b>         | C <sub>6</sub> H <sub>6</sub>     | 35         | 20         | 12                                          |

[a] Yield calculated based on <sup>1</sup>H NMR analysis of reaction mixtures.

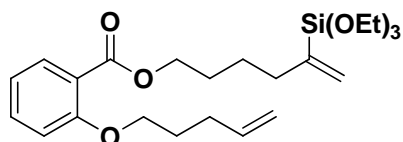

**5-(Triethoxysilyl)hex-5-en-1-yl 2-(pent-4-en-1-yloxy)benzoate (1a)**

Yield 72% (colorless oil); IR (neat,  $\text{cm}^{-1}$ ) 3077, 2974, 2927, 2890, 2736, 1729, 1705, 1641, 1601, 1583, 1492, 1469, 1452, 1390, 1301, 1251, 1165, 1080, 1016, 958;  $^1\text{H-NMR}$  (500 MHz,  $\text{CDCl}_3$ )  $\delta$  7.78-7.76 (m, 1 H), 7.44-7.40 (m, 1 H), 6.97-6.93 (m, 2 H), 5.85 (ddt,  $J = 17.0, 10.5, 6.8$  Hz, 1 H), 5.74-5.73 (m, 1 H), 5.65-5.65 (m, 1 H), 5.08-5.04 (m, 1 H), 4.99 (d,  $J = 10.0$  Hz, 1 H), 4.30 (t,  $J = 6.8$  Hz, 2 H), 4.04 (t,  $J = 6.5$  Hz, 2 H), 3.82 (q,  $J = 6.8$  Hz, 6 H), 2.28 (dt,  $J = 7.2, 7.2$  Hz, 2 H), 2.21 (t,  $J = 7.8$  Hz, 2 H), 1.93 (tt,  $J = 7.0, 7.0$  Hz, 2 H), 1.76 (tt,  $J = 7.2, 7.2$  Hz, 2 H), 1.65-1.59 (m, 2 H), 1.22 (t,  $J = 6.5$  Hz, 9 H);  $^{13}\text{C-NMR}$  (125 MHz,  $\text{CDCl}_3$ )  $\delta$  166.6, 158.5, 143.3, 137.7, 133.1, 131.5, 129.4, 120.1, 120.0, 115.2, 113.1, 68.0, 64.8, 58.5, 35.6, 30.0, 28.5, 28.3, 25.1, 18.2; HRMS (ESI-TOF) calcd. for  $\text{C}_{24}\text{H}_{38}\text{O}_6\text{Si}$   $[\text{M}+\text{Na}]^+$  473.23299, found 473.23204.

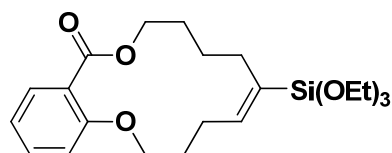

**(E)-6-(triethoxysilyl)-3,4,7,8,9,10-hexahydrobenzo[b][1,5]dioxacyclotetradecin-12(2H)-one (2a)**

Yield 92% (pale yellow oil); IR (neat,  $\text{cm}^{-1}$ ) 3076, 2972, 2927, 2735, 1705, 1602, 1582, 1491, 1453, 1387, 1302, 1252, 1166, 1128, 1080, 1025, 996, 958;  $^1\text{H-NMR}$  (500 MHz,  $\text{C}_6\text{D}_6$ )  $\delta$  7.79-7.77 (m, 1 H), 7.44-7.41 (m, 1 H), 6.97 (dd,  $J = 7.5, 7.5$  Hz, 1 H), 6.92 (d,  $J = 8.5$  Hz, 1 H), 6.21 (t,  $J = 8.0$  Hz, 1 H), 4.43 (t,  $J = 5.2$  Hz, 2 H), 4.06 (t,  $J = 5.0$  Hz, 2 H), 3.83 (q,  $J = 7.0$  Hz, 6 H), 2.43-2.38 (m, 2 H), 2.23-2.19 (m, 2 H), 1.90-1.85 (m, 2 H), 1.83-1.78 (m, 2 H), 1.71-1.65 (m, 2 H), 1.24 (t,  $J = 6.8$  Hz, 9 H);  $^{13}\text{C-NMR}$  (125 MHz,  $\text{C}_6\text{D}_6$ )  $\delta$  168.1, 158.1, 145.2, 134.1, 132.9, 132.8, 122.1, 120.1, 112.1, 67.0, 63.5, 58.6, 30.1, 28.6, 27.7, 26.0, 25.5, 18.6; HRMS (ESI-TOF) calcd. for  $\text{C}_{22}\text{H}_{34}\text{O}_6\text{Si}$   $[\text{M}+\text{Na}]^+$  445.20169, found 445.20168.

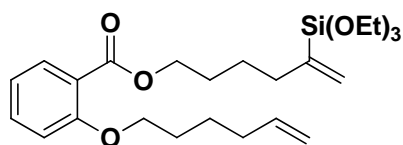

**5-(Triethoxysilyl)hex-5-en-1-yl 2-(hex-5-en-1-yloxy)benzoate (3a)**

Yield 72% (colorless oil); IR (neat,  $\text{cm}^{-1}$ ) 3076, 2974, 2929, 2736, 1729, 1705, 1641, 1601, 1583, 1491, 1452, 1389, 1301, 1249, 1165, 1079, 995, 958;  $^1\text{H-NMR}$  (500 MHz,  $\text{CDCl}_3$ )  $\delta$  7.76 (d,  $J = 8.0$  Hz, 1H), 7.44-7.40 (m, 1 H), 6.96-6.93 (m, 2 H), 5.82 (ddt,  $J = 17.0, 10.5, 6.5$  Hz, 1 H), 5.73-5.73 (m, 1 H), 5.65-5.65 (m, 1 H), 5.05-5.01 (m, 1 H), 4.97 (d,  $J = 10.5$  Hz, 1 H), 4.30 (t,  $J = 6.8$  Hz, 2 H), 4.03 (t,  $J = 6.2$  Hz, 2 H), 3.82 (q,  $J = 6.8$  Hz, 6 H), 2.21 (t,  $J = 7.5$  Hz, 2 H), 2.13 (dt,  $J = 7.2, 7.2$  Hz, 2 H), 1.84 (tt,  $J = 7.1, 7.1$  Hz, 2 H), 1.76 (tt,  $J = 7.1, 7.1$  Hz, 2 H), 1.64-1.57 (m, 4 H), 1.22 (t,  $J = 7.0$  Hz, 9 H);  $^{13}\text{C-NMR}$  (125 MHz,  $\text{CDCl}_3$ )  $\delta$  166.6,

158.5, 143.3, 138.5, 133.1, 131.5, 129.4, 120.9, 119.9, 114.7, 113.0, 68.6, 64.8, 58.5, 35.5, 33.4, 28.6, 28.4, 25.2, 25.1, 18.2; HRMS (ESI-TOF) calcd. for C<sub>25</sub>H<sub>40</sub>O<sub>6</sub>Si [M+Na]<sup>+</sup> 487.24864, found 487.24889.

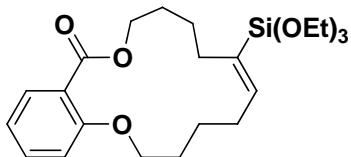

**(E)-7-(Triethoxysilyl)-4,5,8,9,10,11-hexahydro-2H-benzo[*b*][1,5]dioxacyclopentadecin-13(3H)-one (4a)**

Yield 60% (pale yellow oil); IR (neat, cm<sup>-1</sup>) 2972, 2927, 1700, 1602, 1491, 1453, 1388, 1302, 1250, 1166, 1102, 1078, 1018, 958; <sup>1</sup>H-NMR (500 MHz, CDCl<sub>3</sub>) δ 7.75-7.74 (m, 1 H), 7.42-7.39 (m, 1 H), 6.96 (dd, *J* = 7.5, 7.5 Hz, 1 H), 6.91 (d, *J* = 8.5 Hz, 1 H), 6.23 (t, *J* = 7.5 Hz, 1 H), 4.40 (t, *J* = 5.5 Hz, 2 H), 4.07 (t, *J* = 5.0 Hz, 2 H), 3.80 (q, *J* = 6.8 Hz, 6 H), 2.27-2.21 (m, 4 H), 1.87-1.77 (m, 4 H), 1.68-1.58 (m, 4 H), 1.22 (t, *J* = 6.8 Hz, 9 H); <sup>13</sup>C-NMR (125 MHz, C<sub>6</sub>D<sub>6</sub>) δ 167.8, 158.2, 145.0, 134.9, 132.6, 132.2, 122.3, 120.1, 112.4, 68.1, 64.3, 58.6, 29.1, 28.9, 28.9, 28.7, 27.1, 26.9, 18.5; HRMS (ESI-TOF) calcd. for C<sub>23</sub>H<sub>36</sub>O<sub>6</sub>Si [M+Na]<sup>+</sup> 459.21734, found 459.21736.

### C. Catalyst decomposition studies.

a) Reaction kinetics

To a round bottom flask equipped with magnetic stir bar and purged with argon, substrate **3a** (20.0 mg, 0.043 mmol) was added to 22 mL anhydrous benzene (2 mM). Next, catalyst **A** (6.8 mg, 0.009 mmol) was added to the resulting solution. The reaction was stirred at 23 °C and 50 °C respectively. Aliquots of 2 mL of the reaction mixture were taken at 0.5, 1, 1.5, 2, 3, 5, 7, 9, 12, and 24 hours, quenched with ethyl vinyl ether, concentrated and analyzed by proton NMR (**Table S3**). After 5 hours for the reaction at 50 °C, or 24 hours for the reaction at 23 °C, substrate **1a** was added to the reaction. No conversion of substrate **1a** was observed after another 18 hours for both cases.

**Table S3.** Conversion of the RCM reaction of substrate **3a** with catalyst **A** at different temperatures over time.

| Reaction time (h) | Conversion to product (%) at 23 °C | Conversion to product (%) at 50 °C |
|-------------------|------------------------------------|------------------------------------|
| 0                 | 0                                  | 0                                  |
| 0.5               | 1                                  | 26                                 |
| 1                 | 3                                  | 35                                 |
| 1.5               | 5                                  | 38                                 |
| 2                 | 7                                  | 40                                 |
| 3                 | 11                                 | 42                                 |
| 5                 | 18                                 | 42                                 |
| 7                 | 24                                 | -                                  |
| 9                 | 29                                 | -                                  |
| 12                | 34                                 | -                                  |
| 24                | 36                                 | -                                  |



b) Catalyst stability study without any substrate present

To a round bottom flask equipped with magnetic stir bar and purged with argon was added catalyst **A** (3.4 mg, 0.004 mmol) and 11 mL benzene. The reaction was carried out at 23 °C and 50 °C respectively. After 24 hours for the reaction at 23 °C or 5 hours for the reaction at 50 °C, substrate **1a** (9.7 mg, 0.021 mmol) was added to both reactions. After another 18 hours, 16% conversion of substrate **1a** was observed for the reaction at 23 °C and 72% conversion of substrate **1a** was observed for the reaction at 50 °C.

c) Catalyst stability study with simple diolefinic substrate (without siloxyl group)

To a round bottom flask, equipped with magnetic stir bar and purged with argon, was added substrate **32** (6.5 mg, 0.021 mmol) and 11 mL benzene. Next, catalyst **A** (3.4 mg, 0.004 mmol) was added to the resulting solution. The reaction was carried out at 50 °C. After 5.5 hours, substrate **1a** (9.7 mg, 0.021 mmol) was added to the reaction. No conversion of substrate **1a** was observed after another 18 hours.

#### D. Study of influence of silyl groups

Different vinyl silane or vinyl siloxane substrates were synthesized following general procedure for hydrosilylation using the respective silanes. The RCM reaction was then performed following the general procedure for RCM.

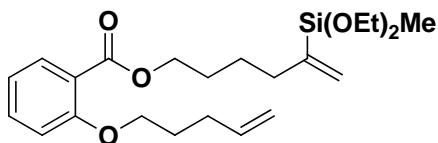

#### 5-(Diethoxy(methyl)silyl)hex-5-en-1-yl 2-(pent-4-en-1-yloxy)benzoate (**1b**, also as **19a**)

Yield 85% (colorless oil); IR (neat,  $\text{cm}^{-1}$ ) 3077, 2972, 2943, 2879, 2763, 2735, 1728, 1705, 1641, 1601, 1583, 1491, 1452, 1389, 1301, 1253, 1164, 1130, 1103, 1079, 1016, 951;  $^1\text{H-NMR}$  (500 MHz,  $\text{CDCl}_3$ )  $\delta$  7.77 (d,  $J = 7.0$  Hz, 1 H), 7.42 (dd,  $J = 7.2, 7.2$  Hz, 1 H), 6.97-6.93 (m, 2 H), 5.85 (ddt,  $J = 17.2, 10.2, 7.0$  Hz, 1 H), 5.69 (bs, 1 H), 5.57-5.56 (m, 1 H), 5.06 (d,  $J = 17.5$  Hz, 1 H), 4.99 (d,  $J = 10.0$  Hz, 1 H), 4.30 (t,  $J = 6.5$  Hz, 2 H), 4.04 (t,  $J = 6.5$  Hz, 2 H), 3.76 (q,  $J = 6.8$  Hz, 4 H), 2.27 (dt,  $J = 7.0, 7.0$  Hz, 2 H), 2.21 (t,  $J = 7.5$  Hz, 2 H), 1.93 (tt,  $J = 6.9, 6.9$  Hz, 2 H), 1.76 (tt,  $J = 7.2, 7.2$  Hz, 2 H), 1.60 (tt,  $J = 7.6, 7.6$  Hz, 2 H), 1.21 (t,  $J = 7.0$  Hz, 6 H), 0.19 (s, 3 H);  $^{13}\text{C-NMR}$  (125 MHz,  $\text{CDCl}_3$ )  $\delta$  166.6, 158.4, 147.0, 137.7, 133.1, 131.5, 127.7, 120.8,

120.0, 115.2, 113.0, 67.9, 64.8, 58.2, 35.1, 30.0, 28.5, 28.3, 25.1, 18.3, -4.6; HRMS (ESI-TOF) calcd. for  $C_{23}H_{36}O_5Si$   $[M+H]^+$  421.24048, found 421.24067.

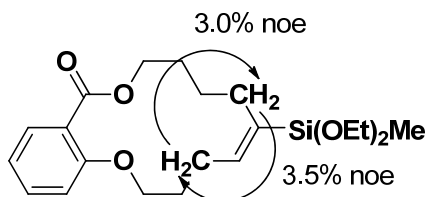

**(E)-6-(Diethoxy(methyl)silyl)-3,4,7,8,9,10-hexahydrobenzo[*b*][1,5]dioxacyclotetradecin-12(2H)-one (2b, also as 19)**

Yield 95% (pale yellow oil); IR (neat,  $cm^{-1}$ ) 3076, 2970, 2927, 2873, 1705, 1602, 1582, 1491, 1453, 1386, 1356, 1303, 1253, 1165, 1129, 1103, 1079, 1051, 1024, 995;  $^1H$ -NMR (500 MHz,  $CDCl_3$ )  $\delta$  7.79-7.77 (m, 1 H), 7.44-7.41 (m, 1 H), 6.97 (dd,  $J = 7.2, 7.2$  Hz, 1 H), 6.92 (d,  $J = 8.0$  Hz, 1 H), 6.11 (t,  $J = 8.0$  Hz, 1 H), 4.43 (t,  $J = 5.2$  Hz, 2 H), 4.06 (t,  $J = 5.0$  Hz, 2 H), 3.77 (q,  $J = 7.0$  Hz, 4 H), 2.40 (dt,  $J = 6.0, 6.0$  Hz, 2 H), 2.21-2.18 (m, 2 H), 1.90-1.84 (m, 2 H), 1.83-1.78 (m, 2H), 1.69-1.62 (m, 2 H), 1.23 (t,  $J = 7.2$  Hz, 6 H), 0.19 (s, 3 H);  $^{13}C$ -NMR (125 MHz,  $CDCl_3$ )  $\delta$  168.5, 157.6, 143.5, 136.8, 133.1, 132.2, 121.1, 120.1, 112.0, 67.4, 63.8, 58.2, 29.9, 28.4, 26.9, 25.7, 25.3, 18.3, -4.9; HRMS (ESI-TOF) calcd. for  $C_{21}H_{32}O_5Si$   $[M+H]^+$  393.20918, found 393.20943.

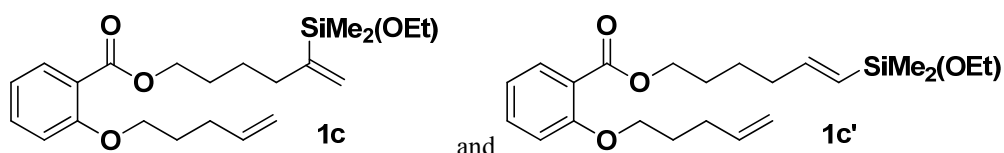

Hydrosilylation reaction gave rise to a 14.4:1 mixture of two regioisomers with the desired regioisomer **1c** being the major one. Yield 84% (colorless oil).

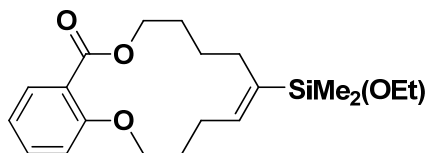

**(E)-6-(Ethoxydimethylsilyl)-3,4,7,8,9,10-hexahydrobenzo[*b*][1,5]dioxacyclotetradecin-12(2H)-one (2c)**

Yield 81% (pale yellow oil); IR (neat,  $cm^{-1}$ ) 2959, 2926, 2865, 1704, 1602, 1491, 1453, 1386, 1303, 1250, 1164, 1131, 1102, 1080, 1049, 1023, 993;  $^1H$ -NMR (500 MHz,  $CDCl_3$ )  $\delta$  7.79-7.77 (m, 1 H), 7.44-7.41 (m, 1 H), 6.97 (dd,  $J = 7.5, 7.5$  Hz, 1 H), 6.92 (d,  $J = 8.5$  Hz, 1 H), 5.97 (t,  $J = 8.0$  Hz, 1 H), 4.43 (t,  $J = 5.2$  Hz, 2 H), 4.06 (t,  $J = 5.0$  Hz, 2 H), 3.65 (q,  $J = 7.0$  Hz, 2 H), 2.42-2.36 (m, 2 H), 2.22-2.18 (m, 2 H), 1.89-1.84 (m, 2 H), 1.83-1.78 (m, 2 H), 1.67-1.61 (m, 2 H), 1.19 (t,  $J = 7.0$  Hz, 3 H), 0.19 (s, 6 H);  $^{13}C$ -NMR (125 MHz,  $CDCl_3$ )  $\delta$  168.5, 157.7, 141.7, 139.8, 133.1, 132.3, 121.1, 120.1, 112.1, 67.5, 63.8, 58.4, 30.1, 28.5, 27.2, 25.8, 25.5, 18.5, -2.4; HRMS (ESI-TOF) calcd. for  $C_{20}H_{30}O_4Si$   $[M+Na]^+$  385.18056, found 385.19580.

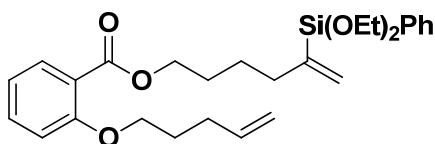

**5-(Diethoxy(phenyl)silyl)hex-5-en-1-yl 2-(pent-4-en-1-yloxy)benzoate (1d)**

Yield 91% (colorless oil); IR (neat,  $\text{cm}^{-1}$ ) 3071, 2973, 2940, 2881, 1728, 1704, 1641, 1601, 1583, 1491, 1469, 1452, 1430, 1389, 1301, 1251, 1164, 1119, 1101, 1079, 1016, 952;  $^1\text{H-NMR}$  (500 MHz,  $\text{CDCl}_3$ )  $\delta$  7.76-7.74 (m, 1 H), 7.64-7.62 (m, 2 H), 7.44-7.33 (m, 4 H), 6.96-6.93 (m, 2 H), 5.88-5.79 (m, 2 H), 5.67-5.66 (m, 1 H), 5.06-5.03 (m, 1 H), 4.98 (d,  $J = 10.0$  Hz, 1 H), 4.23 (t,  $J = 6.5$  Hz, 2 H), 4.03 (t,  $J = 6.5$  Hz, 2 H), 3.81 (q,  $J = 7.0$  Hz, 4 H), 2.26 (dt,  $J = 7.2, 7.2$  Hz, 2 H), 2.22 (t,  $J = 8.0$  Hz, 2 H), 1.91 (tt,  $J = 6.9, 6.9$  Hz, 2 H), 1.70 (tt,  $J = 7.2, 7.2$  Hz, 2 H), 1.56 (tt,  $J = 7.6, 7.6$  Hz, 2 H), 1.23 (t,  $J = 7.2$  Hz, 6 H);  $^{13}\text{C-NMR}$  (125 MHz,  $\text{CDCl}_3$ )  $\delta$  166.6, 158.4, 145.5, 137.7, 134.6, 133.3, 133.1, 131.5, 130.0, 129.4, 127.7, 120.8, 120.0, 115.2, 113.1, 68.0, 64.8, 58.7, 35.2, 30.0, 28.4, 28.3, 25.1, 18.3; HRMS (ESI-TOF) calcd. for  $\text{C}_{28}\text{H}_{38}\text{O}_5\text{Si}$   $[\text{M}+\text{Na}]^+$  505.23807, found 505.24127.

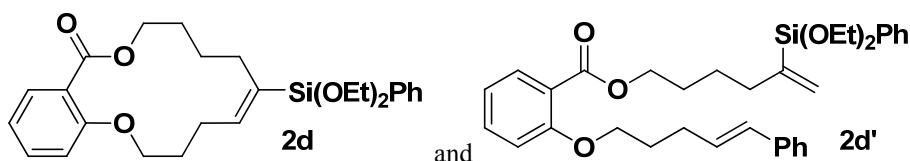

RCM reaction of compound **1d** gave rise to an inseparable mixture of product **2d** and styrene derivative **2d'** as well as acyclic dimer and unreacted starting material. The NMR yield was calculated to be 69% based on analysis of crude  $^1\text{H}$  NMR spectrum.

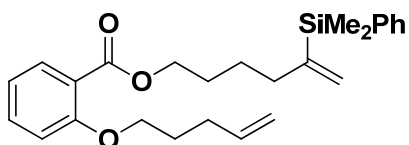

**5-(Dimethyl(phenyl)silyl)hex-5-en-1-yl 2-(pent-4-en-1-yloxy)benzoate (1e)**

Yield 93% (colorless oil); IR (neat,  $\text{cm}^{-1}$ ) 3069, 2949, 1728, 1641, 1601, 1491, 1452, 1430, 1387, 1302, 1251, 1164, 1133, 1078, 1050, 1015;  $^1\text{H-NMR}$  (500 MHz,  $\text{CDCl}_3$ )  $\delta$  7.75-7.73 (m, 1 H), 7.51-7.49 (m, 2 H), 7.44-7.40 (m, 1 H), 7.34-7.32 (m, 3 H), 6.97-6.93 (m, 2 H), 5.84 (ddt,  $J = 17.0, 10.0, 6.8$  Hz, 1 H), 5.70-5.69 (m, 1 H), 5.42-5.42 (m, 1 H), 5.06-5.03 (m, 1 H), 4.99 (d,  $J = 10.5$  Hz, 1 H), 4.21 (t,  $J = 7.0$  Hz, 2 H), 4.03 (t,  $J = 6.5$  Hz, 2 H), 2.26 (dt,  $J = 7.2, 7.2$  Hz, 2 H), 2.17 (t,  $J = 7.5$  Hz, 2 H), 1.91 (tt,  $J = 6.9, 6.9$  Hz, 2 H), 1.68 (tt,  $J = 7.1, 7.1$  Hz, 2 H), 1.52-1.46 (m, 2 H), 0.36 (s, 6 H);  $^{13}\text{C-NMR}$  (125 MHz,  $\text{CDCl}_3$ )  $\delta$  166.6, 158.4, 149.8, 138.2, 137.7, 133.8, 133.1, 131.5, 128.9, 127.7, 126.0, 120.8, 120.0, 115.2, 113.0, 67.9, 64.7, 35.4, 30.0, 28.4, 28.3, 25.1, -3.0; HRMS (ESI-TOF) calcd. for  $\text{C}_{26}\text{H}_{34}\text{O}_3\text{Si}$   $[\text{M}+\text{H}]^+$  423.23500, found 423.23601.

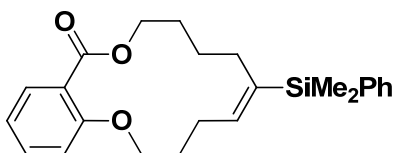

**(E)-6-(Dimethyl(phenyl)silyl)-3,4,7,8,9,10-hexahydrobenzo[*b*][1,5]dioxacyclotetradecin-12(2H)-one (2e)**

RCM reaction of the previous compound (**1e**) gave rise to an inseparable mixture of product and styrene derivative together with unreacted starting material. The NMR yield was calculated to be 71% based on analysis of crude  $^1\text{H}$  NMR spectrum. After the first column chromatography to get rid of the unreacted starting materials, the mixture of product and styrene derivative was subjected to HPLC separation that gave rise to 25 mg pure product (54% yield) as pale yellow oil. HPLC conditions: compound was dissolved in a 1 ml volume of DMSO. The separation was executed on an XBridge 19x100 mm 5  $\mu\text{m}$  columns at a flow rate of 44 ml/min. Aqueous mobile phase A consisted of 0.1% formic acid in water, and organic mobile phase B was 0.1% formic acid in acetonitrile. Purification fractions were immediately frozen at  $-50^\circ\text{C}$  and lyophilized for 24hrs using the Genesis Virtis. After lyophilization the compound was transferred to a preweighed vial using dichloromethane. IR (neat,  $\text{cm}^{-1}$ ) 3067, 2954, 2860, 1703, 1602, 1490, 1452, 1429, 1383, 1302, 1250, 1165, 1131, 1050, 1023, 992;  $^1\text{H}$ -NMR (500 MHz,  $\text{CDCl}_3$ )  $\delta$  7.78-7.76 (m, 1 H), 7.53-7.51 (m, 2 H), 7.44-7.40 (m, 1 H), 7.36-7.33 (m, 3 H), 6.97 (dd,  $J = 7.5, 7.5$  Hz, 1 H), 6.92 (d,  $J = 7.5$  Hz, 1 H), 5.91 (t,  $J = 8.0$  Hz, 1 H), 4.38 (t,  $J = 5.2$  Hz, 2 H), 4.06 (t,  $J = 5.0$  Hz, 2 H), 2.42-2.37 (m, 2 H), 2.18-2.15 (m, 2 H), 1.89-1.84 (m, 2 H), 1.73-1.68 (m, 2 H), 1.59-1.52 (m, 2 H), 0.35 (s, 6 H);  $^{13}\text{C}$ -NMR (125 MHz,  $\text{CDCl}_3$ )  $\delta$  168.5, 157.7, 141.7, 139.4, 138.8, 134.0, 133.1, 132.2, 128.8, 127.7, 121.1, 120.0, 112.1, 67.5, 63.8, 30.1, 28.4, 28.2, 25.9, 25.7, -3.1; HRMS (ESI-TOF) calcd. for  $\text{C}_{24}\text{H}_{30}\text{O}_3\text{Si}$   $[\text{M}+\text{Na}]^+$  417.18564, found 417.18593.

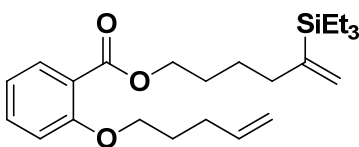

**5-(Triethylsilyl)hex-5-en-1-yl 2-(pent-4-en-1-yloxy)benzoate (1f)**

Yield 38% (colorless oil); IR (neat,  $\text{cm}^{-1}$ ) 3077, 3048, 2951, 2911, 2875, 1729, 1704, 1641, 1601, 1582, 1491, 1453, 1416, 1385, 1301, 1250, 1164, 1133, 1078, 1050, 1013;  $^1\text{H}$ -NMR (500 MHz,  $\text{CDCl}_3$ )  $\delta$  7.78-7.76 (m, 1 H), 7.44-7.41 (m, 1 H), 6.97-6.94 (m, 2 H), 5.85 (ddt,  $J = 17.0, 10.0, 6.8$  Hz, 1 H), 5.65-5.64 (m, 1 H), 5.32-5.31 (m, 1 H), 5.08-5.04 (m, 1 H), 4.99 (d,  $J = 10.0$  Hz, 1 H), 4.30 (t,  $J = 6.5$  Hz, 2 H), 4.04 (t,  $J = 6.5$  Hz, 2 H), 2.27 (dt,  $J = 7.2, 7.2$  Hz, 2 H), 2.14 (t,  $J = 7.8$  Hz, 2 H), 1.93 (tt,  $J = 7.0, 7.0$  Hz, 2 H), 1.76 (tt,  $J = 7.1, 7.1$  Hz, 2 H), 1.60-1.54 (m, 2 H), 0.92 (t,  $J = 8.0$  Hz, 6 H), 0.60 (q,  $J = 8.0$  Hz, 9 H);  $^{13}\text{C}$ -NMR (125 MHz,  $\text{CDCl}_3$ )  $\delta$  166.6, 158.4, 148.5, 137.7, 133.1, 131.5, 125.3, 120.8, 120.0, 115.2, 113.1, 68.0, 64.8, 35.7, 30.0, 28.6, 28.3, 25.1, 7.3, 2.9; HRMS (ESI-TOF) calcd. for  $\text{C}_{24}\text{H}_{38}\text{O}_3\text{Si}$   $[\text{M}+\text{H}]^+$  403.26630, found 403.26630.

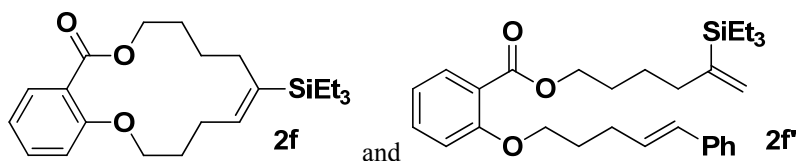

RCM reaction of compound **1f** gave rise to an inseparable mixture of product **2f** and styrene derivative **2f'**. Unreacted starting material and acyclic dimer were also observed. The NMR yield was calculated to be 10% based on analysis of crude  $^1\text{H}$  NMR spectrum.

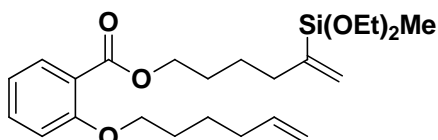

**5-(Diethoxy(methyl)silyl)hex-5-en-1-yl 2-(hex-5-en-1-yloxy)benzoate (3b, also as 20a)**

Yield 79% (colorless oil); IR (neat,  $\text{cm}^{-1}$ ) 3076, 2972, 2940, 1729, 1705, 1641, 1601, 1491, 1452, 1389, 1301, 1252, 1164, 1103, 1079, 996, 951;  $^1\text{H}$ -NMR (500 MHz,  $\text{CDCl}_3$ )  $\delta$  7.78-7.76 (m, 1 H), 7.44-7.40 (m, 1 H), 6.96-6.93 (m, 2 H), 5.82 (ddt,  $J = 17.0, 10.5, 6.5$  Hz, 1 H), 5.69-5.69 (m, 1 H), 5.57-5.56 (m, 1 H), 5.05-5.01 (m, 1 H), 4.97 (d,  $J = 10.5$  Hz, 1 H), 4.30 (t,  $J = 6.8$  Hz, 2 H), 4.03 (t,  $J = 6.5$  Hz, 2 H), 3.76 (q,  $J = 7.0$  Hz, 4 H), 2.21 (t,  $J = 7.5$  Hz, 2 H), 2.13 (dt,  $J = 7.2, 7.2$  Hz, 2 H), 1.84 (tt,  $J = 7.1, 7.1$  Hz, 2 H), 1.76 (tt,  $J = 7.2, 7.2$  Hz, 2 H), 1.63-1.57 (m, 4 H), 1.21 (t,  $J = 7.0$  Hz, 6 H), 0.19 (s, 3 H);  $^{13}\text{C}$ -NMR (125 MHz,  $\text{CDCl}_3$ )  $\delta$  166.6, 158.5, 147.1, 138.5, 133.1, 131.5, 127.6, 120.8, 119.9, 114.7, 113.0, 68.6, 64.8, 58.2, 35.1, 33.4, 28.6, 28.5, 25.2, 25.1, 18.3, -4.6; HRMS (ESI-TOF) calcd. for  $\text{C}_{24}\text{H}_{38}\text{O}_5\text{Si}$   $[\text{M}+\text{Na}]^+$  457.23807, found 457.24010.

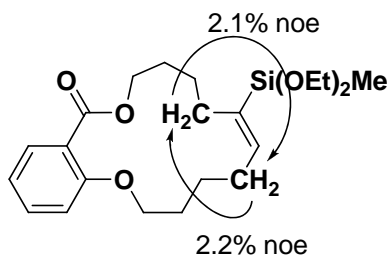

**(E)-7-(Diethoxy(methyl)silyl)-4,5,8,9,10,11-hexahydro-2H-benzo[b][1,5]dioxacyclopentadecin-13(3H)-one (4b, also as 20)**

Yield 76% (pale yellow oil); IR (neat,  $\text{cm}^{-1}$ ) 2969, 2928, 1700, 1602, 1491, 1452, 1387, 1302, 1251, 1165, 1130, 1103, 1078, 1016, 952;  $^1\text{H}$ -NMR (500 MHz,  $\text{CDCl}_3$ )  $\delta$  7.76-7.74 (m, 1 H), 7.42-7.39 (m, 1 H), 6.96 (dd,  $J = 7.5, 7.5$  Hz, 1 H), 6.92 (d,  $J = 7.5$  Hz, 1 H), 6.13 (t,  $J = 7.5$  Hz, 1 H), 4.40 (t,  $J = 5.5$  Hz, 2 H), 4.08 (t,  $J = 5.0$  Hz, 2 H), 3.74 (q,  $J = 6.8$  Hz, 4 H), 2.25-2.21 (m, 4 H), 1.87-1.76 (m, 4 H), 1.68-1.56 (m, 4 H), 1.21 (t,  $J = 6.8$  Hz, 6 H), 0.17 (s, 3 H);  $^{13}\text{C}$ -NMR (125 MHz,  $\text{CDCl}_3$ )  $\delta$  168.2, 157.7, 143.5, 137.5, 132.9, 131.7, 121.2, 120.0, 112.3, 68.3, 64.6, 58.1, 28.9, 28.8, 28.6, 28.0, 26.9, 26.7, 18.3, -4.6; HRMS (ESI-TOF) calcd. for  $\text{C}_{22}\text{H}_{34}\text{O}_5\text{Si}$   $[\text{M}+\text{Na}]^+$  429.20677, found 429.20692.

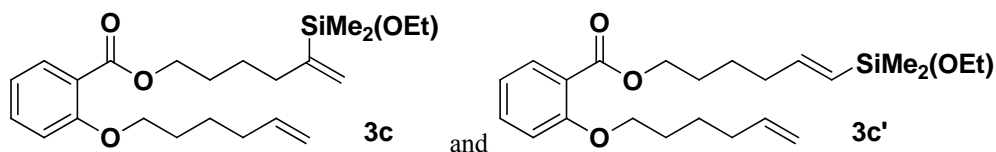

Hydrosilylation reaction gave rise to a 14.3:1 mixture of two regioisomers with the desired regio isomer **3c** being the major one. Yield 89% (colorless oil).

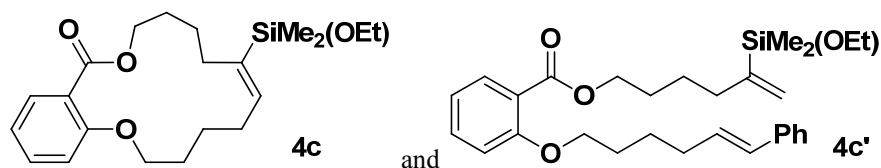

RCM reaction of the mixture **3c** and **3c'** gave rise to an inseparable mixture of product **4c** and styrene derivative **4c'** as well as acyclic dimer and unreacted starting material. The NMR yield was calculated to be 62% based on analysis of crude  $^1\text{H}$  NMR spectrum.

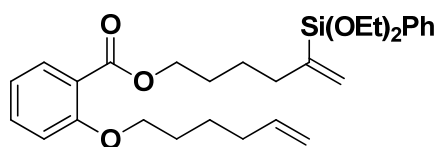

#### 5-(Diethoxy(phenyl)silyl)hex-5-en-1-yl 2-(hex-5-en-1-yloxy)benzoate (**3d**)

Yield 76% (colorless oil); IR (neat,  $\text{cm}^{-1}$ ) 3071, 2973, 2938, 1729, 1704, 1640, 1601, 1583, 1491, 1470, 1453, 1430, 1389, 1301, 1250, 1164, 1119, 1102, 1079, 997, 952;  $^1\text{H}$ -NMR (500 MHz,  $\text{CDCl}_3$ )  $\delta$  7.75-7.73 (m, 1 H), 7.64-7.62 (m, 2 H), 7.44-7.33 (m, 4 H), 6.96-6.93 (m, 2 H), 5.85-5.77 (m, 2 H), 5.67-5.66 (m, 1 H), 5.04-5.00 (m, 1 H), 4.96 (d,  $J = 10.0$  Hz, 1 H), 4.22 (t,  $J = 7.0$  Hz, 2 H), 4.02 (t,  $J = 6.2$  Hz, 2 H), 3.81 (q,  $J = 7.0$  Hz, 4 H), 2.22 (t,  $J = 7.8$  Hz, 2 H), 2.11 (dt,  $J = 5.5, 5.5$  Hz, 2 H), 1.83 (tt,  $J = 7.0, 7.0$  Hz, 2 H), 1.70 (tt,  $J = 7.2, 7.2$  Hz, 2 H), 1.62-1.52 (m, 4 H), 1.23 (t,  $J = 7.2$  Hz, 6 H);  $^{13}\text{C}$ -NMR (125 MHz,  $\text{CDCl}_3$ )  $\delta$  166.6, 158.5, 145.5, 138.5, 134.6, 133.3, 133.1, 131.5, 130.0, 129.4, 127.7, 120.9, 119.9, 114.7, 113.0, 68.6, 64.8, 58.7, 35.2, 33.4, 28.6, 28.4, 25.2, 25.1, 18.3; HRMS (ESI-TOF) calcd. for  $\text{C}_{29}\text{H}_{40}\text{O}_5\text{Si}$   $[\text{M}+\text{Na}]^+$  519.25372, found 519.25541.

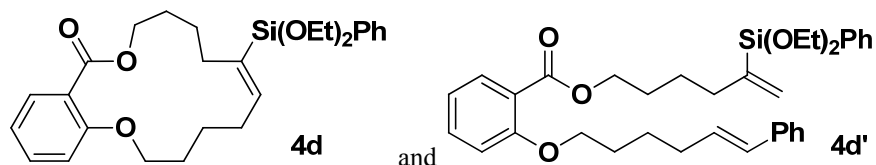

RCM reaction of compound **3d** gave rise to an inseparable mixture of product **4d** and styrene derivative **4d'** as well as acyclic dimers and unreacted starting material. The NMR yield was calculated to be 35% based on analysis of crude  $^1\text{H}$  NMR spectrum.

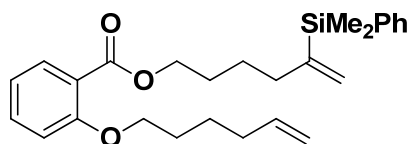

**5-(Dimethyl(phenyl)silyl)hex-5-en-1-yl 2-(hex-5-en-1-yloxy)benzoate (3e)**

Yield 74% (colorless oil); IR (neat,  $\text{cm}^{-1}$ ) 3069, 2945, 1728, 1703, 1641, 1601, 1491, 1452, 1430, 1388, 1301, 1250, 1164, 1133, 1077, 1049, 996;  $^1\text{H-NMR}$  (500 MHz,  $\text{CDCl}_3$ )  $\delta$  7.75-7.73 (m, 1 H), 7.51-7.49 (m, 2 H), 7.44-7.40 (m, 1 H), 7.34-7.31 (m, 3 H), 6.96-6.93 (m, 2 H), 5.81 (ddt,  $J = 16.8, 10.2, 6.5$  Hz, 1 H), 5.70-5.69 (m, 1 H), 5.43-5.42 (m, 1 H), 5.04-5.00 (m, 1 H), 4.96 (d,  $J = 9.5$  Hz, 1 H), 4.21 (t,  $J = 6.5$  Hz, 2 H), 4.02 (t,  $J = 6.2$  Hz, 2 H), 2.17 (t,  $J = 7.8$  Hz, 2 H), 2.11 (dt,  $J = 7.2, 7.2$  Hz, 2 H), 1.83 (tt,  $J = 7.0, 7.0$  Hz, 2 H), 1.67 (tt,  $J = 7.0, 7.0$  Hz, 2 H), 1.58 (tt,  $J = 7.5, 7.5$  Hz, 2 H), 1.52-1.46 (m, 2 H), 0.37 (s, 6 H);  $^{13}\text{C-NMR}$  (125 MHz,  $\text{CDCl}_3$ )  $\delta$  166.6, 158.5, 149.9, 138.5, 138.2, 133.8, 133.1, 131.5, 128.9, 127.7, 126.0, 120.8, 119.9, 114.7, 113.0, 68.6, 64.7, 35.4, 33.4, 28.6, 28.4, 25.2, 25.1, -3.0; HRMS (ESI-TOF) calcd. for  $\text{C}_{27}\text{H}_{36}\text{O}_3\text{Si}$   $[\text{M}+\text{H}]^+$  437.25065, found 437.25057.

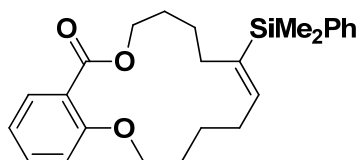

**(E)-7-(dimethyl(phenyl)silyl)-4,5,8,9,10,11-hexahydro-2H-benzo[*b*][1,5]dioxacyclopentadecin-13(3H)-one (4e)**

Yield 32% (pale yellow oil); IR (neat,  $\text{cm}^{-1}$ ) 3067, 2952, 2859, 1698, 1601, 1490, 1452, 1429, 1383, 1302, 1249, 1165, 1132, 1108, 1049, 1015, 963;  $^1\text{H-NMR}$  (500 MHz,  $\text{CDCl}_3$ )  $\delta$  7.77-7.75 (m, 1 H), 7.51-7.49 (m, 2 H), 7.43-7.39 (m, 1 H), 7.34-7.33 (m, 3 H), 6.95 (dd,  $J = 7.8, 7.8$  Hz, 1 H), 6.92 (d,  $J = 9.0$  Hz, 1 H), 5.94 (t,  $J = 7.2$  Hz, 1 H), 4.34 (t,  $J = 5.5$  Hz, 2 H), 4.08 (t,  $J = 5.2$  Hz, 2 H), 2.25-2.18 (m, 4 H), 1.87-1.82 (m, 2 H), 1.70-1.61 (m, 4 H), 1.46 (tt,  $J = 7.9$  Hz, 2 H), 0.34 (s, 6 H);  $^{13}\text{C-NMR}$  (125 MHz,  $\text{C}_6\text{D}_6$ )  $\delta$  168.2, 157.7, 142.2, 139.8, 139.0, 134.0, 133.0, 131.8, 128.8, 127.6, 121.1, 120.0, 112.3, 68.3, 64.6, 29.0, 28.9, 28.9, 28.8, 27.0, 27.0, -2.6; HRMS (ESI-TOF) calcd. for  $\text{C}_{25}\text{H}_{32}\text{O}_3\text{Si}$   $[\text{M}+\text{Na}]^+$  431.20129, found 431.20247.

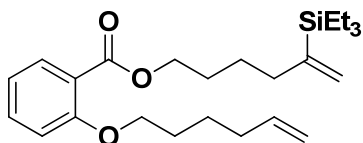

**5-(Triethylsilyl)hex-5-en-1-yl 2-(hex-5-en-1-yloxy)benzoate (3f)**

Yield 56% (colorless oil); IR (neat,  $\text{cm}^{-1}$ ) 3076, 3047, 2951, 2911, 2874, 1730, 1704, 1641, 1601, 1583, 1491, 1453, 1416, 1385, 1301, 1249, 1164, 1132, 1077, 1049, 1017, 959;  $^1\text{H-NMR}$  (500 MHz,  $\text{CDCl}_3$ )  $\delta$  7.78-7.76 (m, 1 H), 7.44-7.41 (m, 1 H), 6.97-6.94 (m, 2 H), 5.82 (ddt,  $J = 17.0, 10.0, 6.8$  Hz, 1 H), 5.65-5.64 (m, 1 H), 5.32-5.31 (m, 1 H), 5.05-5.01 (m, 1 H), 4.98-4.96 (m, 1 H), 4.30 (t,  $J = 6.8$  Hz, 2 H), 4.03 (t,  $J = 6.8$  Hz, 2 H),

2.16-2.11 (m, 4 H), 1.85 (tt,  $J = 7.0, 7.0$  Hz, 2 H), 1.76 (tt,  $J = 7.0, 7.0$  Hz, 2 H), 1.63-1.54 (m, 4 H), 0.92 (t,  $J = 8.0$  Hz, 6 H), 0.60 (q,  $J = 8.0$  Hz, 9 H);  $^{13}\text{C}$ -NMR (125 MHz,  $\text{CDCl}_3$ )  $\delta$  166.7, 158.5, 148.6, 138.5, 133.1, 131.5, 125.3, 120.8, 120.0, 114.7, 113.1, 68.6, 64.8, 35.7, 33.4, 28.6, 28.6, 25.2, 25.1, 7.3, 2.9; HRMS (ESI-TOF) calcd. for  $\text{C}_{25}\text{H}_{40}\text{O}_3\text{Si}$   $[\text{M}+\text{Na}]^+$  439.26389, found 439.26459.

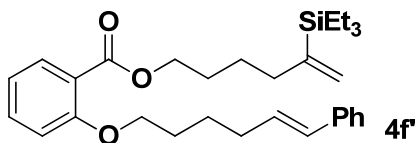

RCM reaction of compound **3f** gave rise to less than 2% product based on analysis of crude  $^1\text{H}$  NMR spectrum. Styrene derivative **4f'**, unreacted starting material and acyclic dimer were observed.

## E. RCM of various vinylsiloxane substrates and protodesilylation of the alkenyl siloxane products.

*Note on compound numbering:* ring-closed alkenyl siloxanes are designated as the parent compound and numerated with just a number (ie. **5**), the acyclic precursors are designated with an 'a' following the parent compound number (ie. **5a**) and the desilylated cyclic compounds are designated with a 'b' following the parent compound number (ie. **5b**).

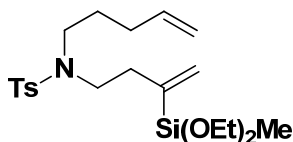

### *N*-(3-(Diethoxy(methyl)silyl)but-3-enyl)-4-methyl-*N*-(pent-4-enyl)benzenesulfonamide (**5a**)

Yield 70% (colorless oil); IR (neat,  $\text{cm}^{-1}$ ) 3051, 2974, 2926, 2878, 1641, 1599, 1494, 1444, 1390, 1342, 1306, 1258, 1159, 1103, 1079, 955;  $^1\text{H}$ -NMR (500 MHz,  $\text{CDCl}_3$ )  $\delta$  7.70 (d,  $J = 7.8$  Hz, 2 H), 7.28 (d,  $J = 7.8$  Hz, 2 H), 5.77 (ddt,  $J = 17.2, 10.2, 6.5$  Hz, 1 H), 5.70 (d,  $J = 1.2$  Hz, 1 H), 5.58 (d,  $J = 1.2$  Hz, 1 H), 5.01 (d,  $J = 17.2$  Hz, 1 H), 4.97 (d,  $J = 10.2$  Hz, 1 H), 3.74 (q,  $J = 7.0$  Hz, 4 H), 3.22-3.19 (m, 2 H), 3.14 (t,  $J = 7.8$  Hz, 2 H), 2.41 (s, 3 H), 2.35 (t,  $J = 8.0$  Hz, 2 H), 2.06 (dt,  $J = 7.0, 7.0$  Hz, 2 H), 1.69-1.63 (m, 2 H), 1.20 (t,  $J = 7.0$  Hz, 6 H), 0.18 (s, 3 H);  $^{13}\text{C}$ -NMR (125 MHz,  $\text{CDCl}_3$ )  $\delta$  144.1, 142.9, 137.5, 137.2, 130.0, 129.5, 127.1, 115.2, 58.3, 48.0, 47.8, 35.1, 30.8, 27.7, 21.4, 18.3, -4.9; HRMS (ESI-TOF) calcd. for  $\text{C}_{21}\text{H}_{35}\text{NO}_4\text{SSi}$   $[\text{M}+\text{Na}]^+$  448.19483, found 448.19573.

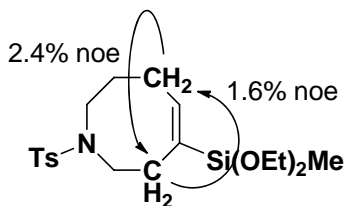

### (*E*)-6-(Diethoxy(methyl)silyl)-1-tosyl-1,2,3,4,7,8-hexahydroazocine (**5**)



Yield 75% (pale yellow oil); IR (neat,  $\text{cm}^{-1}$ ) 2972, 2926, 1615, 1455, 1389, 1338, 1292, 1257, 1158, 1079, 1050, 1017, 995;  $^1\text{H-NMR}$  (500 MHz,  $\text{CDCl}_3$ )  $\delta$  7.68 (d,  $J = 8.2$  Hz, 2 H), 7.28 (d,  $J = 8.2$  Hz, 2 H), 6.28 (t,  $J = 8.2$  Hz, 1 H), 3.72 (q,  $J = 7.2$  Hz, 4 H), 3.15 (bs, 2 H), 3.02 (t,  $J = 5.5$  Hz, 2 H), 2.44 (t,  $J = 5.0$  Hz, 2 H), 2.41 (s, 3 H), 2.32 (dt,  $J = 6.8, 6.8$  Hz, 2 H), 1.79-1.74 (m, 2 H), 1.19 (t,  $J = 7.0$  Hz, 6 H), 0.15 (s, 3 H);  $^{13}\text{C-NMR}$  (125 MHz,  $\text{CDCl}_3$ )  $\delta$  143.8, 142.8, 137.0, 137.0, 129.6, 126.8, 58.2, 50.8, 48.2, 29.2, 29.1, 24.8, 21.4, 18.3, -4.9; HRMS (ESI-TOF) calcd. for  $\text{C}_{19}\text{H}_{31}\text{NO}_4\text{SSi}$   $[\text{M}+\text{H}]^+$  398.18159, found 398.27160.

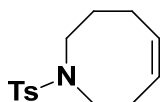

**(Z)-1-tosyl-1,2,3,4,7,8-hexahydroazocine (5b)**

Yield 72% (colorless oil); IR (neat,  $\text{cm}^{-1}$ ) 3018, 2933, 2858, 1598, 1494, 1456, 1369, 1333, 1304, 1289, 1157, 1112, 1091, 1060, 1038, 991;  $^1\text{H-NMR}$  (500 MHz,  $\text{CDCl}_3$ )  $\delta$  7.67 (d,  $J = 8.5$  Hz, 2 H), 7.27 (d,  $J = 8.5$  Hz, 2 H), 5.74-5.66 (m, 2 H), 3.14 (t,  $J = 5.0$  Hz, 2 H), 3.08 (t,  $J = 5.5$  Hz, 2 H), 2.40 (s, 3 H), 2.31-2.28 (m, 2 H), 2.22 (dt,  $J = 6.9, 6.9$  Hz, 2 H), 1.76-1.72 (m, 2 H);  $^{13}\text{C-NMR}$  (125 MHz,  $\text{CDCl}_3$ )  $\delta$  142.9, 136.9, 131.3, 129.5, 128.2, 126.8, 50.8, 48.2, 29.4, 28.1, 23.3, 21.4; HRMS (ESI-TOF) calcd. for  $\text{C}_{14}\text{H}_{19}\text{NO}_2\text{S}$   $[\text{M}+\text{H}]^+$  266.12093, found 266.12097.

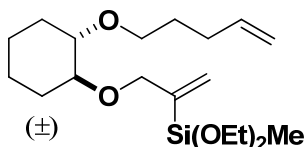

**Diethoxy(methyl)(3-((1S,2S)-2-(pent-4-enyloxy)cyclohexyloxy)prop-1-en-2-yl)silane and its enantiomer (6a)**

Yield 62% (colorless oil); IR (neat,  $\text{cm}^{-1}$ ) 3077, 2974, 2934, 2865, 1641, 1449, 1390, 1366, 1295, 1257, 1164, 1104, 1083, 992, 951;  $^1\text{H-NMR}$  (500 MHz,  $\text{CDCl}_3$ )  $\delta$  6.00-5.98 (m, 1 H), 5.82 (dddd,  $J = 17.0, 10.0, 6.5, 6.5$  Hz, 1 H), 5.64-5.63 (m, 1 H), 5.03-4.99 (m, 1 H), 4.96-4.93 (m, 1 H), 4.24-4.23 (m, 2 H), 3.77 (q,  $J = 7.0$  Hz, 4 H), 3.59-3.50 (m, 2 H), 3.26-3.18 (m, 2 H), 2.14-2.10 (m, 2 H), 1.97-1.94 (m, 2 H), 1.68-1.62 (m, 4 H), 1.35-1.19 (m, 10 H), 0.22 (s, 3 H);  $^{13}\text{C-NMR}$  (125 MHz,  $\text{CDCl}_3$ )  $\delta$  144.8, 138.5, 126.9, 114.5, 81.1, 80.6, 72.4, 69.1, 58.3, 30.4, 29.8, 29.8, 29.5, 23.3, 23.3, 18.3, -4.3; HRMS (ESI-TOF) calcd. for  $\text{C}_{19}\text{H}_{36}\text{O}_4\text{Si}$   $[\text{M}+\text{Na}]^+$  379.22751, found 379.22440.

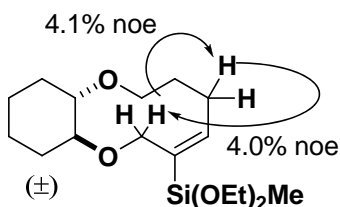

**((8aS,12aS,E)-2,5,6,7,8a,9,10,11,12,12a-Decahydrobenzo[b][1,4]dioxecin-3-yl)diethoxy(methyl)silane and its enantiomer (6)**

Yield 87% (pale yellow oil); IR (neat,  $\text{cm}^{-1}$ ) 2972, 2932, 2862, 1615, 1451, 1390, 1364, 1256, 1165, 1113, 1082, 1009, 952;  $^1\text{H-NMR}$  (500 MHz,  $\text{CDCl}_3$ )  $\delta$  6.22 (dd,  $J = 10.2, 6.8$  Hz, 1 H), 4.33 (d,  $J = 10.5$  Hz, 1 H), 4.26 (d,  $J = 10.5$  Hz, 1 H), 3.81-3.76 (m, 4 H), 3.72-3.68 (m, 1 H), 3.62-3.57 (m, 1 H), 3.22-3.17 (m, 1 H), 3.02-2.97 (m, 1 H), 2.68-2.60 (m, 1 H), 2.18-2.12 (m, 1 H), 2.00-1.98 (m, 1 H), 1.94-1.92 (m, 1 H), 1.90-1.82 (m, 1 H), 1.66-1.65 (m, 2 H), 1.54-1.48 (m, 1 H), 1.26-1.12 (m, 10 H), 0.21 (s, 3 H);  $^{13}\text{C-NMR}$  (125 MHz,  $\text{CDCl}_3$ )  $\delta$  146.8, 136.6, 83.2, 83.1, 67.6, 66.7, 58.3, 31.8, 31.8, 28.6, 25.1, 24.7, 24.5, 18.3, -4.4; HRMS (ESI-TOF) calcd. for  $\text{C}_{17}\text{H}_{32}\text{O}_4\text{Si}$   $[\text{M}+\text{Na}]^+$  351.19621, found 351.19793.

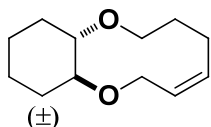

**(8a*S*,12a*S*,*Z*)-2,3,4,7,8a,9,10,11,12,12a-decahydrobenzo[*b*][1,4]dioxecine and its enantiomer (6b)**

Yield 86% (colorless oil); IR (neat,  $\text{cm}^{-1}$ ) 3012, 2930, 2858, 1451, 1360, 1315, 1239, 1206, 1117, 1086, 1051, 1026, 970;  $^1\text{H-NMR}$  (500 MHz,  $\text{CDCl}_3$ )  $\delta$  5.79 (ddd,  $J = 10.0, 10.0, 5.0$  Hz, 1 H), 5.55 (ddd,  $J = 10.7, 10.7, 6.5$  Hz, 1 H), 4.31 (dd,  $J = 10.5, 10.5$  Hz, 1 H), 4.19 (dd,  $J = 10.7, 5.2$  Hz, 1 H), 3.70-3.67 (m, 1 H), 3.53-3.49 (m, 1 H), 3.20-3.15 (m, 1 H), 2.96-2.92 (m, 1 H), 2.65-2.59 (m, 1 H), 1.94-1.80 (m, 4 H), 1.64-1.63 (m, 2 H), 1.43-1.37 (m, 1 H), 1.22-1.10 (m, 4 H);  $^{13}\text{C-NMR}$  (125 MHz,  $\text{CDCl}_3$ )  $\delta$  131.7, 128.8, 84.7, 83.2, 67.3, 66.9, 32.2, 31.6, 28.1, 24.6, 24.5, 22.6; HRMS (ESI-TOF) calcd. for  $\text{C}_{12}\text{H}_{20}\text{O}_2$   $[\text{M}+\text{H}]^+$  197.15361, found 197.15343.

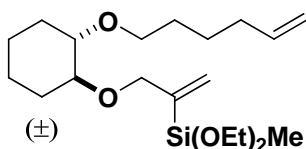

**Diethoxy(3-((1*S*,2*S*)-2-(hex-5-enyloxy)cyclohexyloxy)prop-1-en-2-yl)(methyl)silane and its enantiomer (7a)**

Yield 64% (colorless oil); IR (neat,  $\text{cm}^{-1}$ ) 3076, 2974, 2934, 2863, 1641, 1451, 1390, 1366, 1295, 1257, 1164, 1104, 1083, 993, 951;  $^1\text{H-NMR}$  (500 MHz,  $\text{CDCl}_3$ )  $\delta$  5.99-5.98 (m, 1 H), 5.80 (dddd,  $J = 17.0, 10.5, 7.0, 7.0$  Hz, 1 H), 5.64-5.62 (m, 1 H), 5.01-4.98 (m, 1 H), 4.94-4.92 (m, 1 H), 4.23-4.23 (m, 2 H), 3.77 (q,  $J = 7.0$  Hz, 4 H), 3.58-3.49 (m, 2 H), 3.25-3.18 (m, 2 H), 2.08-2.04 (m, 2 H), 1.97-1.93 (m, 2 H), 1.65-1.62 (m, 2 H), 1.60-1.54 (m, 2 H), 1.48-1.42 (m, 2 H), 1.35-1.19 (m, 10 H), 0.22 (s, 3 H);  $^{13}\text{C-NMR}$  (125 MHz,  $\text{CDCl}_3$ )  $\delta$  144.8, 138.8, 126.9, 114.4, 81.1, 80.6, 72.4, 69.6, 58.3, 33.6, 29.8, 29.8, 25.6, 23.3, 23.3, 18.3, -4.3; HRMS (ESI-TOF) calcd. for  $\text{C}_{20}\text{H}_{38}\text{O}_4\text{Si}$   $[\text{M}+\text{Na}]^+$  393.24316, found 393.24372.

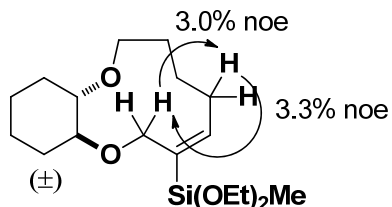

**((9aS,13aS,E)-5,6,7,8,9a,10,11,12,13,13a-Decahydro-2H-benzo[*b*][1,4]dioxacycloundecin-3-yl)diethoxy(methyl)silane and its enantiomer (7)**

Yield 36% (pale yellow oil); IR (neat,  $\text{cm}^{-1}$ ) 2971, 2929, 2860, 1618, 1450, 1389, 1371, 1255, 1191, 1165, 1104, 1079, 1044, 1003, 951;  $^1\text{H-NMR}$  (500 MHz,  $\text{CDCl}_3$ )  $\delta$  6.23 (dd,  $J = 10.0, 6.0$  Hz, 1 H), 4.24 (d,  $J = 10.2$  Hz, 1 H), 4.14 (d,  $J = 10.2$  Hz, 1 H), 3.85-3.82 (m, 1 H), 3.77 (q,  $J = 7.0$  Hz, 4 H), 3.54-3.51 (m, 1 H), 3.14-3.09 (m, 1 H), 3.00-2.97 (m, 1 H), 2.66-2.58 (m, 1 H), 2.24-2.18 (m, 1 H), 2.10-2.08 (m, 1 H), 2.00-1.98 (m, 1 H), 1.75-1.66 (m, 4 H), 1.59-1.52 (m, 1 H), 1.44-1.39 (m, 1 H), 1.23-1.08 (m, 10 H), 0.19 (s, 3 H);  $^{13}\text{C-NMR}$  (125 MHz,  $\text{CDCl}_3$ )  $\delta$  149.7, 133.4, 84.1, 82.2, 71.9, 66.2, 58.2, 31.5, 31.1, 28.4, 27.2, 27.0, 24.5, 24.3, 18.3, -4.6; HRMS (ESI-TOF) calcd. for  $\text{C}_{18}\text{H}_{34}\text{O}_4\text{Si}$   $[\text{M}+\text{Na}]^+$  365.21186, found 365.21302.

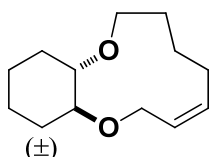

**((9aS,13aS,Z)-3,4,5,8,9a,10,11,12,13,13a-decahydro-2H-benzo[*b*][1,4]dioxacycloundecine and its enantiomer (7b)**

Yield 90% (colorless oil); IR (neat,  $\text{cm}^{-1}$ ) 3012, 2930, 2858, 1450, 1370, 1312, 1243, 1188, 1130, 1102, 999;  $^1\text{H-NMR}$  (500 MHz,  $\text{CDCl}_3$ )  $\delta$  5.65 (ddd,  $J = 9.5, 9.5, 5.0$  Hz, 1 H), 5.56 (ddd,  $J = 10.0, 10.0, 5.0$  Hz, 1 H), 4.28 (dd,  $J = 10.0, 10.0$  Hz, 1 H), 4.06 (dd,  $J = 10.0, 5.0$  Hz, 1 H), 3.70 (dd,  $J = 10.0, 8.0$  Hz, 1 H), 3.47 (dd,  $J = 11.5, 6.5$  Hz, 1 H), 3.14 (ddd,  $J = 9.0, 9.0, 5.0$  Hz, 1 H), 2.98 (ddd,  $J = 9.5, 9.5, 5.0$  Hz, 1 H), 2.63-2.56 (m, 1 H), 2.04-2.00 (m, 3 H), 1.73-1.64 (m, 4 H), 1.51-1.45 (m, 1 H), 1.42-1.37 (m, 1 H), 1.19-1.07 (m, 4 H);  $^{13}\text{C-NMR}$  (125 MHz,  $\text{CDCl}_3$ )  $\delta$  135.0, 126.1, 84.3, 82.1, 71.0, 66.4, 31.9, 30.7, 28.2, 26.7, 26.1, 24.5, 24.2; HRMS (ESI-TOF) calcd. for  $\text{C}_{13}\text{H}_{22}\text{O}_2$   $[\text{M}+\text{H}]^+$  211.16926, found 211.16944.

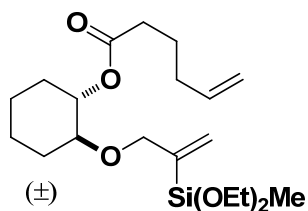

**(1S,2S)-2-((2-(Diethoxy(methyl)silyl)allyl)oxy)cyclohexyl hex-5-enoate and its enantiomer (8a)**

Yield 65% (colorless oil); IR (neat,  $\text{cm}^{-1}$ ) 3077, 2973, 2938, 2866, 1736, 1641, 1452, 1389, 1365, 1254, 1168, 1103, 1080, 1009, 951;  $^1\text{H-NMR}$  (500 MHz,  $\text{CDCl}_3$ )  $\delta$  5.93-5.93 (m, 1 H), 5.78 (dddd,  $J = 17.0, 10.5, 6.5, 6.5$

Hz, 1 H), 5.62-5.62 (m, 1 H), 5.04-5.00 (m, 1 H), 4.98 (d,  $J = 10.0$  Hz, 1 H), 4.81 (ddd,  $J = 8.5, 8.5, 4.5$  Hz, 1 H), 4.20 (d,  $J = 13.0$  Hz, 1 H), 4.10 (d,  $J = 13.0$  Hz, 1 H), 3.76 (q,  $J = 7.0$  Hz, 4 H), 3.32 (ddd,  $J = 8.5, 8.5, 4.0$  Hz, 1 H), 2.31 (dd,  $J = 8.0, 8.0$  Hz, 2 H), 2.09 (ddd,  $J = 7.0, 7.0, 7.0$  Hz, 2 H), 2.03-1.97 (m, 2 H), 1.76-1.64 (m, 4 H), 1.44-1.33 (m, 3 H), 1.30-1.20 (m, 7 H), 0.20 (s, 3 H);  $^{13}\text{C}$ -NMR (125 MHz,  $\text{CDCl}_3$ )  $\delta$  172.9, 144.4, 137.8, 127.1, 115.2, 78.7, 74.7, 72.0, 58.3, 58.3, 33.9, 33.0, 29.6, 29.5, 24.1, 23.1, 23.0, 18.3, -4.3; HRMS (ESI-TOF) calcd. for  $\text{C}_{20}\text{H}_{36}\text{O}_5\text{Si}$   $[\text{M}+\text{Na}]^+$  407.22242, found 407.22435.

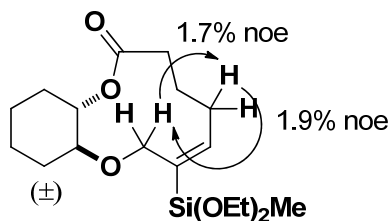

**(9a*S*,13a*S*,*E*)-7-(Diethoxy(methyl)silyl)-3,4,5,8,9a,10,11,12,13,13a-decahydro-2*H*-benzo[*b*][1,4]dioxacycloundecin-2-one and its enantiomer (8)**

Yield 43% (pale yellow oil); IR (neat,  $\text{cm}^{-1}$ ) 2971, 2932, 2865, 1736, 1614, 1450, 1389, 1365, 1256, 1225, 1196, 1152, 1084, 1055, 983, 952;  $^1\text{H}$ -NMR (500 MHz,  $\text{CDCl}_3$ )  $\delta$  6.20-6.17 (m, 1 H), 4.75 (ddd,  $J = 10.0, 10.0, 5.0$  Hz, 1 H), 4.22 (d,  $J = 12.8$  Hz, 1 H), 3.99 (d,  $J = 12.8$  Hz, 1 H), 3.81-3.73 (m, 4H), 3.21 (ddd,  $J = 10.0, 10.0, 4.5$  Hz, 1 H), 2.85-2.76 (m, 1 H), 2.37-2.26 (m, 2 H), 2.16-2.12 (m, 2 H), 2.06-1.99 (m, 1 H), 1.95-1.93 (m, 1 H), 1.83-1.70 (m, 3 H), 1.34-1.16 (m, 10 H), 0.20 (s, 3 H);  $^{13}\text{C}$ -NMR (125 MHz,  $\text{CDCl}_3$ )  $\delta$  173.4, 150.2, 135.5, 79.4, 75.0, 63.3, 58.2, 58.2, 33.3, 30.6, 30.1, 27.1, 24.1, 23.6, 18.4, 18.3, -4.9; HRMS (ESI-TOF) calcd. for  $\text{C}_{18}\text{H}_{32}\text{O}_5\text{Si}$   $[\text{M}+\text{H}]^+$  357.20918, found 357.20950.

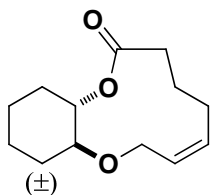

**(9a*S*,13a*S*,*Z*)-3,4,5,8,9a,10,11,12,13,13a-decahydro-2*H*-benzo[*b*][1,4]dioxacycloundecin-2-one and its enantiomer (8b)**

Yield 83% (colorless oil); IR (neat,  $\text{cm}^{-1}$ ) 3011, 2936, 2862, 1735, 1451, 1364, 1322, 1217, 1153, 1087, 1032, 984;  $^1\text{H}$ -NMR (500 MHz,  $\text{CDCl}_3$ )  $\delta$  6.63-6.59 (m, 1 H), 5.54 (ddd,  $J = 10.5, 8.0, 8.0$  Hz, 1 H), 4.73-4.68 (m, 1 H), 4.20 (dd,  $J = 13.2, 4.8$  Hz, 1 H), 3.94 (dd,  $J = 13.2, 7.2$  Hz, 1 H), 3.24-3.19 (m, 1 H), 2.50-2.43 (m, 1 H), 2.36-2.26 (m, 2 H), 2.16-2.03 (m, 2 H), 1.97-1.85 (m, 2 H), 1.82-1.67 (m, 3 H), 1.33-1.13 (m, 4 H);  $^{13}\text{C}$ -NMR (125 MHz,  $\text{CDCl}_3$ )  $\delta$  173.2, 134.6, 127.3, 80.1, 75.8, 64.3, 33.9, 30.9, 30.5, 25.9, 24.0, 23.9, 23.8; HRMS (ESI-TOF) calcd. for  $\text{C}_{13}\text{H}_{20}\text{O}_3$   $[\text{M}+\text{Na}]^+$  247.13047, found 247.13070.

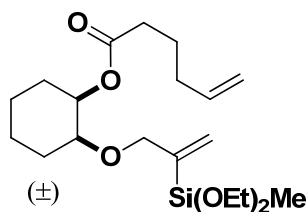

**(1*R*,2*S*)-2-((2-(Diethoxy(methyl)silyl)allyl)oxy)cyclohexyl hex-5-enoate and its enantiomer (9a)**

Yield 69% (colorless oil); IR (neat, cm<sup>-1</sup>) 3077, 2973, 2939, 2869, 1733, 1641, 1449, 1388, 1364, 1255, 1170, 1104, 1082, 951; <sup>1</sup>H-NMR (500 MHz, CDCl<sub>3</sub>) δ 5.94-5.93 (m, 1 H), 5.78 (dddd, *J* = 16.8, 10.2, 6.8, 6.8 Hz, 1 H), 5.64-5.63 (m, 1 H), 5.08-5.07 (m, 1 H), 5.04-5.00 (m, 1 H), 4.98 (d, *J* = 10.0 Hz, 1 H), 4.14 (d, *J* = 13.0 Hz, 1 H), 4.10 (d, *J* = 13.0 Hz, 1 H), 3.79-3.75 (m, 4 H), 3.49-3.48 (m, 1 H), 2.34 (dd, *J* = 7.5, 7.5 Hz, 2 H), 2.09 (ddd, *J* = 7.0, 7.0, 7.0 Hz, 2 H), 1.93-1.88 (m, 1 H), 1.85-1.78 (m, 1 H), 1.76-1.65 (m, 3 H), 1.62-1.47 (m, 3 H), 1.43-1.29 (m, 2 H), 1.23-1.20 (m, 6 H), 0.22 (s, 3 H); <sup>13</sup>C-NMR (125 MHz, CDCl<sub>3</sub>) δ 173.1, 144.4, 137.8, 127.4, 115.2, 76.5, 71.6, 58.3, 33.9, 33.0, 27.8, 27.8, 24.2, 22.0, 21.8, 18.3, -4.3; HRMS (ESI-TOF) calcd. for C<sub>20</sub>H<sub>36</sub>O<sub>5</sub>Si [M+Na]<sup>+</sup> 407.22242, found 407.22426.

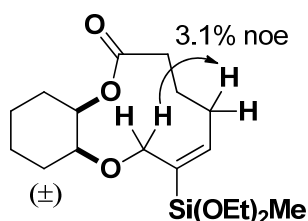

**(9a*S*,13a*R*,*E*)-7-(Diethoxy(methyl)silyl)-3,4,5,8,9a,10,11,12,13,13a-decahydro-2*H*-benzo[*b*][1,4]dioxacycloundecin-2-one and its enantiomer (9)**

Yield 36% (pale yellow oil); IR (neat, cm<sup>-1</sup>) 2970, 2931, 2870, 1730, 1614, 1450, 1390, 1360, 1246, 1225, 1162, 1110, 1080, 1049, 949; <sup>1</sup>H-NMR (500 MHz, CDCl<sub>3</sub>) δ 6.24 (dd, *J* = 9.8, 6.2 Hz, 1 H), 4.67 (ddd, *J* = 11.0, 3.8, 3.8 Hz, 1 H), 4.29 (d, *J* = 11.5 Hz, 1 H), 3.89 (bs, 1 H), 3.86 (d, *J* = 11.5 Hz, 1 H), 3.80-3.75 (m, 4 H), 2.45 (ddd, *J* = 13.2, 8.2, 4.8 Hz, 1 H), 2.25-2.13 (m, 3 H), 1.94-1.88 (m, 2 H), 1.86-1.78 (m, 2 H), 1.72-1.70 (m, 1 H), 1.59-1.48 (m, 2 H), 1.42-1.17 (m, 9 H), 0.21 (s, 3 H); <sup>13</sup>C-NMR (125 MHz, CDCl<sub>3</sub>) δ 173.6, 147.9, 134.7, 75.6, 74.0, 65.8, 58.3, 34.7, 28.6, 27.6, 26.5, 24.9, 23.7, 19.9, 18.3, -4.6; HRMS (ESI-TOF) calcd. for C<sub>18</sub>H<sub>32</sub>O<sub>5</sub>Si [M+H]<sup>+</sup> 357.20918, found 357.21015.

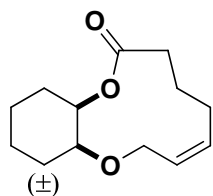

**(9a*S*,13a*R*,*Z*)-3,4,5,8,9a,10,11,12,13,13a-decahydro-2*H*-benzo[*b*][1,4]dioxacycloundecin-2-one and its enantiomer (9b)**



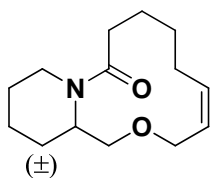

**(±)-(Z)-1,6,7,8,9,12,13,14,15,15a-decahydropyrido[2,1-c][1,4]oxaazacyclododecin-10(3H)-one (10b)**

Yield 90% (colorless oil); IR (neat,  $\text{cm}^{-1}$ ) 3010, 2934, 2861, 1631, 1444, 1419, 1367, 1327, 1266, 1125, 1078, 1029;  $^1\text{H-NMR}$  (500 MHz,  $\text{CDCl}_3$ )  $\delta$  5.59-5.49 (m, 2 H), 4.61-4.59 (m, 1 H), 4.36 (bs, 1 H), 4.24-4.20 (m, 1 H), 3.84-3.82 (m, 1 H), 3.76 (dd,  $J = 9.8, 9.8$  Hz, 1 H), 3.43-3.40 (m, 1 H), 2.74 (bs, 1 H), 2.53 (dd,  $J = 12.2, 12.2$  Hz, 1 H), 2.38 (bs, 1 H), 1.93-1.92 (m, 2 H), 1.73-1.60 (m, 6 H), 1.44-1.30 (m, 4 H);  $^{13}\text{C-NMR}$  (125 MHz,  $\text{CDCl}_3$ )  $\delta$  173.3, 134.9, 125.4, 67.3, 65.5, 51.1, 36.8, 29.5, 26.8, 26.4, 25.2, 25.1, 23.6, 19.4; HRMS (ESI-TOF) calcd. for  $\text{C}_{14}\text{H}_{23}\text{NO}_2$   $[\text{M}+\text{Na}]^+$  260.16210, found 260.16176.

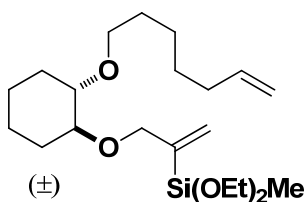

**Diethoxy(3-(((1S,2S)-2-(hept-6-en-1-yloxy)cyclohexyl)oxy)prop-1-en-2-yl)(methyl)silane and its enantiomer (11a)**

Yield 59% (colorless oil); IR (neat,  $\text{cm}^{-1}$ ) 3076, 2974, 2933, 2862, 1641, 1451, 1390, 1366, 1295, 1257, 1164, 1104, 1083, 994, 952;  $^1\text{H-NMR}$  (500 MHz,  $\text{CDCl}_3$ )  $\delta$  5.99-5.98 (m, 1 H), 5.80 (dddd,  $J = 17.0, 10.5, 6.8, 6.8$  Hz, 1 H), 5.64-5.63 (m, 1 H), 5.01-4.97 (m, 1 H), 4.94-4.92 (m, 1 H), 4.23-4.23 (m, 2 H), 3.77 (q,  $J = 7.0$  Hz, 4 H), 3.57-3.48 (m, 2 H), 3.25-3.18 (m, 2 H), 2.04 (ddd,  $J = 7.0, 7.0, 7.0$  Hz, 2 H), 1.96-1.94 (m, 2 H), 1.65-1.62 (m, 2 H), 1.59-1.53 (m, 2 H), 1.41-1.19 (m, 14 H), 0.22 (s, 3 H);  $^{13}\text{C-NMR}$  (125 MHz,  $\text{CDCl}_3$ )  $\delta$  144.8, 139.0, 126.9, 114.2, 81.1, 80.7, 72.4, 69.8, 58.3, 33.7, 30.2, 29.8, 29.8, 28.8, 25.7, 23.3, 23.3, 18.3, -4.3; HRMS (ESI-TOF) calcd. for  $\text{C}_{21}\text{H}_{40}\text{O}_4\text{Si}$   $[\text{M}+\text{Na}]^+$  407.25881, found 407.25995.

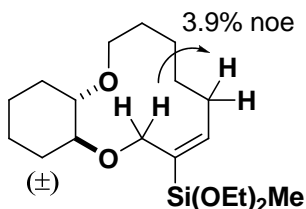

**((10aS,14aS,E)-2,5,6,7,8,9,10a,11,12,13,14,14a-dodecahydrobenzo[b][1,4]dioxacyclododecin-3-yl)diethoxy(methyl)silane and its enantiomer (11)**

Yield 59% (pale yellow oil); IR (neat,  $\text{cm}^{-1}$ ) 2970, 2930, 2859, 1616, 1450, 1389, 1365, 1254, 1166, 1135, 1111, 1083, 1024, 950;  $^1\text{H-NMR}$  (500 MHz,  $\text{CDCl}_3$ )  $\delta$  6.33 (dd,  $J = 8.8, 6.8$  Hz, 1 H), 4.35 (d,  $J = 8.8$  Hz, 1

H), 4.07 (d,  $J = 8.8$  Hz, 1 H), 3.92-3.89 (m, 1 H), 3.79-3.74 (m, 4 H), 3.16-3.12 (m, 1 H), 3.09-3.05 (m, 2 H), 2.62-2.55 (m, 1 H), 2.08-2.03 (m, 2 H), 2.00-1.94 (m, 1 H), 1.68-1.59 (m, 4 H), 1.56-1.46 (m, 4 H), 1.22-1.08 (m, 10 H), 0.19 (s, 3 H);  $^{13}\text{C-NMR}$  (125 MHz,  $\text{CDCl}_3$ )  $\delta$  149.7, 133.7, 84.2, 81.4, 70.0, 66.5, 58.2, 58.2, 31.2, 30.7, 27.7, 27.4, 27.2, 25.8, 24.5, 24.2, 18.3, -4.5; HRMS (ESI-TOF) calcd. for  $\text{C}_{19}\text{H}_{36}\text{O}_4\text{Si}$   $[\text{M}+\text{Na}]^+$  379.22751, found 379.22910.

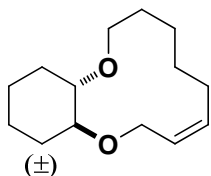

**(10aS,14aS,Z)-2,3,4,5,6,9,10a,11,12,13,14,14a-dodecahydrobenzo[b][1,4]dioxacyclododecine and its enantiomer (11b)**

Yield 88% (colorless oil), inseparable mixture with styrene derivative; IR (neat,  $\text{cm}^{-1}$ ) 3014, 2930, 2858, 1451, 1361, 1334, 1313, 1244, 1190, 1130, 1107, 1047, 983, 962;  $^1\text{H-NMR}$  (500 MHz,  $\text{CDCl}_3$ )  $\delta$  5.73-5.65 (m, 2 H), 4.47 (dd,  $J = 9.0, 9.0$  Hz, 1 H), 3.96 (dd,  $J = 9.2, 4.2$  Hz, 1 H), 3.93-3.90 (m, 1 H), 3.16-3.08 (m, 3 H), 2.45-2.38 (m, 1 H), 2.08-2.07 (m, 1 H), 2.00-1.98 (m, 1 H), 1.90-1.86 (m, 1 H), 1.70-1.60 (m, 3 H), 1.52-1.45 (m, 4 H), 1.28-1.13 (m, 5 H);  $^{13}\text{C-NMR}$  (125 MHz,  $\text{CDCl}_3$ )  $\delta$  135.4, 126.3, 84.8, 80.8, 69.6, 66.0, 31.5, 30.6, 28.1, 27.3, 24.9, 24.6, 24.1, 24.0; HRMS (ESI-TOF) calcd. for  $\text{C}_{14}\text{H}_{24}\text{O}_2$   $[\text{M}+\text{Na}]^+$  247.16685, found 247.16800.

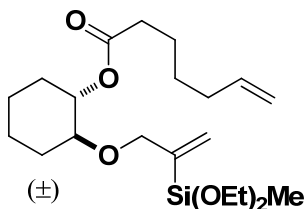

**(1S,2S)-2-((2-(Diethoxy(methyl)silyl)allyl)oxy)cyclohexyl hept-6-enoate and its enantiomer (12a)**

Yield 60% (colorless oil); IR (neat,  $\text{cm}^{-1}$ ) 3075, 2973, 2937, 2865, 1736, 1641, 1452, 1389, 1257, 1166, 1103, 1080, 1008, 952;  $^1\text{H-NMR}$  (500 MHz,  $\text{CDCl}_3$ )  $\delta$  5.93-5.93 (m, 1 H), 5.79 (dddd,  $J = 17.0, 10.5, 6.5, 6.5$  Hz, 1 H), 5.62-5.62 (m, 1 H), 5.02-4.98 (m, 1 H), 4.95 (d,  $J = 10.0$  Hz, 1 H), 4.81 (ddd,  $J = 8.2, 8.2, 4.5$  Hz, 1 H), 4.21 (d,  $J = 13.2$  Hz, 1 H), 4.10 (d,  $J = 13.2$  Hz, 1 H), 3.76 (q,  $J = 7.0$  Hz, 4 H), 3.32 (ddd,  $J = 8.5, 8.5, 4.0$  Hz, 1 H), 2.30 (dd,  $J = 8.0, 8.0$  Hz, 2 H), 2.08-1.96 (m, 4 H), 1.71-1.61 (m, 4 H), 1.45-1.39 (m, 3 H), 1.34 (dd,  $J = 9.5, 9.5$  Hz, 2 H), 1.30-1.20 (m, 7 H), 0.21 (s, 3 H);  $^{13}\text{C-NMR}$  (125 MHz,  $\text{CDCl}_3$ )  $\delta$  173.0, 144.4, 138.4, 127.1, 114.6, 78.7, 74.6, 72.0, 58.3, 58.3, 34.5, 33.4, 29.6, 29.5, 28.3, 24.4, 23.1, 23.0, 18.3, -4.3; HRMS (ESI-TOF) calcd. for  $\text{C}_{21}\text{H}_{38}\text{O}_5\text{Si}$   $[\text{M}+\text{Na}]^+$  421.23807, found 421.23885.



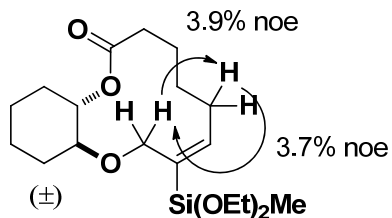

**(10aS,14aS,E)-8-(Diethoxy(methyl)silyl)-3,4,5,6,10a,11,12,13,14,14a-decahydrobenzo[b][1,4]dioxacyclododecin-2(9H)-one and its enantiomer (12)**

Yield 82% (pale yellow oil); IR (neat,  $\text{cm}^{-1}$ ) 2971, 2936, 2866, 1734, 1617, 1451, 1389, 1360, 1338, 1256, 1225, 1189, 1150, 1104, 1082, 1036, 996, 950;  $^1\text{H-NMR}$  (500 MHz,  $\text{CDCl}_3$ )  $\delta$  6.37 (dd,  $J = 10.2, 5.8$  Hz, 1 H), 4.61 (ddd,  $J = 10.2, 10.2, 4.5$  Hz, 1 H), 4.10 (d,  $J = 9.0$  Hz, 1 H), 4.04 (d,  $J = 9.0$  Hz, 1 H), 3.76-3.71 (m, 4 H), 3.22 (ddd,  $J = 10.0, 10.0, 4.5$  Hz, 1 H), 2.66 (dddd,  $J = 11.3, 11.3, 11.3, 4.0$  Hz, 1 H), 2.47 (ddd,  $J = 12.5, 12.5, 4.5$  Hz, 1 H), 2.35 (ddd,  $J = 13.2, 4.8, 4.8$  Hz, 1 H), 2.16-2.15 (m, 1 H), 2.07-2.06 (m, 1 H), 1.96-1.90 (m, 1 H), 1.85-1.78 (m, 1 H), 1.74-1.69 (m, 2 H), 1.65-1.56 (m, 2 H), 1.33-1.18 (m, 11 H), 0.17 (s, 3 H);  $^{13}\text{C-NMR}$  (125 MHz,  $\text{CDCl}_3$ )  $\delta$  173.8, 151.1, 132.6, 80.4, 76.5, 65.4, 58.3, 58.2, 33.3, 31.0, 30.2, 27.9, 27.7, 24.9, 24.1, 24.0, 18.3, -4.9; HRMS (ESI-TOF) calcd. for  $\text{C}_{19}\text{H}_{34}\text{O}_5\text{Si}$   $[\text{M}+\text{H}]^+$  371.22483, found 371.22556.

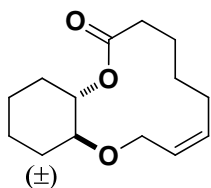

**(10aS,14aS,Z)-3,4,5,6,10a,11,12,13,14,14a-decahydrobenzo[b][1,4]dioxacyclododecin-2(9H)-one and its enantiomer (12b)**

Yield 91% (colorless oil); IR (neat,  $\text{cm}^{-1}$ ) 3019, 2937, 2862, 1732, 1451, 1354, 1278, 1222, 1150, 1107, 1085, 1034, 989;  $^1\text{H-NMR}$  (500 MHz,  $\text{CDCl}_3$ )  $\delta$  5.84 (ddd,  $J = 10.0, 10.0, 5.5$  Hz, 1 H), 5.65 (ddd,  $J = 10.0, 7.0, 7.0$  Hz, 1 H), 4.62 (ddd,  $J = 10.0, 10.0, 5.0$  Hz, 1 H), 4.06 (dd,  $J = 8.5, 8.5$  Hz, 1 H), 3.98 (dd,  $J = 9.5, 6.5$  Hz, 1 H), 3.22 (ddd,  $J = 10.0, 10.0, 4.0$  Hz, 1 H), 2.55 (dddd,  $J = 11.5, 11.5, 11.5, 4.0$  Hz, 1 H), 2.46 (ddd,  $J = 12.5, 12.5, 4.0$  Hz, 1 H), 2.35 (ddd,  $J = 13.0, 5.0, 5.0$  Hz, 1 H), 2.11-2.06 (m, 2 H), 1.94-1.87 (m, 1 H), 1.76-1.67 (m, 3 H), 1.65-1.55 (m, 2 H), 1.34-1.17 (m, 5 H);  $^{13}\text{C-NMR}$  (125 MHz,  $\text{CDCl}_3$ )  $\delta$  173.6, 138.1, 124.6, 80.6, 76.7, 65.2, 33.1, 30.9, 30.6, 28.2, 25.9, 24.6, 24.2, 23.9; HRMS (ESI-TOF) calcd. for  $\text{C}_{14}\text{H}_{22}\text{O}_3$   $[\text{M}+\text{Na}]^+$  261.14612, found 261.14610.

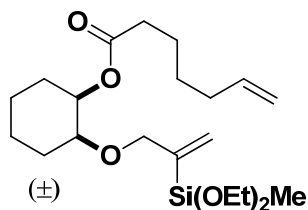

**(1R,2S)-2-((2-(Diethoxy(methyl)silyl)allyl)oxy)cyclohexyl hept-6-enoate and its enantiomer (13a)**

Yield 66% (colorless oil); IR (neat,  $\text{cm}^{-1}$ ) 3076, 2972, 2938, 2866, 1734, 1641, 1449, 1388, 1364, 1257, 1169, 1104, 1081, 992, 951;  $^1\text{H-NMR}$  (500 MHz,  $\text{CDCl}_3$ )  $\delta$  5.94-5.93 (m, 1 H), 5.79 (dddd,  $J = 17.0, 10.5, 6.5, 6.5$  Hz, 1 H), 5.64-5.63 (m, 1 H), 5.08-5.06 (m, 1 H), 5.02-4.98 (m, 1 H), 4.94 (d,  $J = 10.0$  Hz, 1 H), 4.14 (d,  $J = 13.0$  Hz, 1 H), 4.10 (d,  $J = 13.0$  Hz, 1 H), 3.79-3.75 (m, 4 H), 3.49-3.48 (m, 1 H), 2.33 (dd,  $J = 7.2, 7.2$  Hz, 2 H), 2.06 (ddd,  $J = 7.2, 7.2, 7.2$  Hz, 2 H), 1.93-1.87 (m, 1 H), 1.85-1.78 (m, 1 H), 1.70-1.47 (m, 6 H), 1.46-1.29 (m, 4 H), 1.21 (dd,  $J = 7.0, 7.0$  Hz, 6 H), 0.22 (s, 3 H);  $^{13}\text{C-NMR}$  (125 MHz,  $\text{CDCl}_3$ )  $\delta$  173.2, 144.4, 138.5, 127.4, 114.6, 76.5, 71.6, 58.3, 34.5, 33.4, 28.3, 27.8, 27.8, 24.5, 22.0, 21.9, 18.3, -4.3; HRMS (ESI-TOF) calcd. for  $\text{C}_{21}\text{H}_{38}\text{O}_5\text{Si}$   $[\text{M}+\text{Na}]^+$  421.23807, found 421.23931.

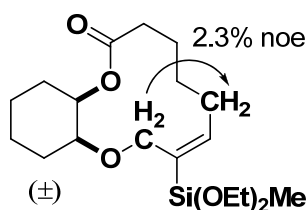

**(10a*S*,14a*R*,*E*)-8-(Diethoxy(methyl)silyl)-3,4,5,6,10a,11,12,13,14,14a-decahydrobenzo[*b*][1,4]dioxacyclododecin-2(9*H*)-one and its enantiomer (13)**

Yield 46% (pale yellow oil); IR (neat,  $\text{cm}^{-1}$ ) 2970, 2935, 2864, 1730, 1616, 1449, 1389, 1353, 1256, 1224, 1156, 1105, 1079, 984, 952;  $^1\text{H-NMR}$  (500 MHz,  $\text{CDCl}_3$ )  $\delta$  6.26 (dd,  $J = 8.2, 6.8$  Hz, 1 H), 5.02-5.00 (m, 1 H), 4.06-4.01 (m, 2 H), 3.78-3.73 (m, 4 H), 3.61-3.60 (m, 1 H), 2.40-2.28 (m, 2 H), 2.27-2.15 (m, 2 H), 1.96-1.90 (m, 1 H), 1.88-1.78 (m, 2 H), 1.75-1.68 (m, 1 H), 1.67-1.54 (m, 6 H), 1.40-1.29 (m, 2 H), 1.22-1.19 (m, 6 H), 0.18 (s, 3 H);  $^{13}\text{C-NMR}$  (125 MHz,  $\text{CDCl}_3$ )  $\delta$  174.3, 149.6, 133.3, 75.0, 71.9, 63.6, 58.3, 58.2, 34.9, 29.7, 28.6, 27.9, 27.7, 27.6, 24.4, 22.1, 21.7, 18.3, -4.8; HRMS (ESI-TOF) calcd. for  $\text{C}_{19}\text{H}_{34}\text{O}_5\text{Si}$   $[\text{M}+\text{Na}]^+$  393.20677, found 393.20690.

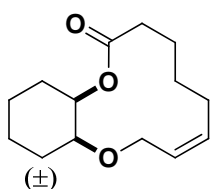

**(10a*S*,14a*R*,*Z*)-3,4,5,6,10a,11,12,13,14,14a-decahydrobenzo[*b*][1,4]dioxacyclododecin-2(9*H*)-one and its enantiomer (13b)**

Yield 97% (colorless oil); IR (neat,  $\text{cm}^{-1}$ ) 2935, 2859, 1729, 1449, 1352, 1219, 1147, 1081, 1047;  $^1\text{H-NMR}$  (500 MHz,  $\text{CDCl}_3$ )  $\delta$  5.71 (ddd,  $J = 10.5, 8.0, 8.0$  Hz, 1 H), 5.61 (ddd,  $J = 10.5, 6.5, 6.5$  Hz, 1 H), 5.07-5.06 (m, 1 H), 4.09-4.00 (m, 2 H), 3.65-3.63 (m, 1 H), 2.43-2.38 (m, 1 H), 2.34-2.29 (m, 1 H), 2.26-2.18 (m, 1 H), 2.10-2.03 (m, 1 H), 1.99-1.94 (m, 1 H), 1.83-1.72 (m, 3 H), 1.71-1.50 (m, 6 H), 1.42-1.28 (m, 2 H);  $^{13}\text{C-NMR}$  (125 MHz,  $\text{CDCl}_3$ )  $\delta$  174.3, 136.3, 125.4, 74.3, 71.9, 62.8, 34.6, 28.7, 28.3, 27.5, 26.1, 23.9, 22.2, 21.6; HRMS (ESI-TOF) calcd. for  $\text{C}_{14}\text{H}_{22}\text{O}_3$   $[\text{M}+\text{Na}]^+$  261.14612, found 261.14045.

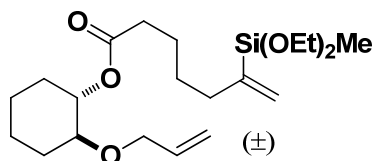

**(1*S*,2*S*)-2-(Allyloxy)cyclohexyl 6-(diethoxy(methyl)silyl)hept-6-enoate and its enantiomer (14a)**

Yield 82% (colorless oil); IR (neat,  $\text{cm}^{-1}$ ) 3075, 2973, 2937, 2865, 1736, 1641, 1452, 1389, 1364, 1257, 1166, 1102, 1080, 1008, 994, 952;  $^1\text{H-NMR}$  (500 MHz,  $\text{CDCl}_3$ )  $\delta$  5.91-5.84 (m, 1 H), 5.67 (bs, 1 H), 5.55-5.55 (m, 1 H), 5.25 (d,  $J = 17.5$  Hz, 1 H), 5.13 (d,  $J = 10.0$  Hz, 1 H), 4.80-4.76 (m, 1 H), 4.09 (dd,  $J = 12.8, 5.2$  Hz, 1 H), 4.01 (dd,  $J = 12.8, 5.2$  Hz, 1 H), 3.76 (q,  $J = 7.0$  Hz, 4 H), 3.32-3.28 (m, 1 H), 2.31 (dd,  $J = 7.8, 7.8$  Hz, 2 H), 2.16 (dd,  $J = 7.8, 7.8$  Hz, 2 H), 2.00-1.97 (m, 2 H), 1.71-1.62 (m, 4 H), 1.52-1.46 (m, 2 H), 1.41-1.20 (m, 10 H), 0.19 (s, 3 H);  $^{13}\text{C-NMR}$  (125 MHz,  $\text{CDCl}_3$ )  $\delta$  173.0, 147.1, 135.4, 127.5, 116.2, 78.4, 74.7, 70.4, 58.2, 35.1, 34.6, 29.9, 29.7, 28.2, 24.9, 23.2, 23.2, 18.3, -4.6; HRMS (ESI-TOF) calcd. for  $\text{C}_{21}\text{H}_{38}\text{O}_5\text{Si}$   $[\text{M}+\text{Na}]^+$  421.23807, found 421.24013.

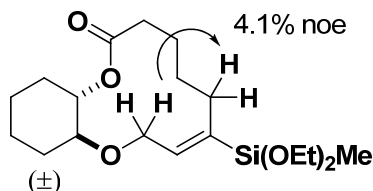

**(10*aS*,14*aS*,*E*)-7-(Diethoxy(methyl)silyl)-3,4,5,6,10*a*,11,12,13,14,14*a*-decahydrobenzo[*b*][1,4]dioxacyclododecin-2(9*H*)-one and its enantiomer (14)**

Yield 79% (pale yellow oil); IR (neat,  $\text{cm}^{-1}$ ) 2971, 2937, 2866, 1733, 1450, 1390, 1353, 1339, 1256, 1227, 1146, 1103, 1081, 1036, 996, 951;  $^1\text{H-NMR}$  (500 MHz,  $\text{CDCl}_3$ )  $\delta$  6.21 (dd,  $J = 7.0, 7.0$  Hz, 1H), 4.65-4.60 (m, 1 H), 4.20 (dd,  $J = 8.5, 8.5$  Hz, 1 H), 3.98 (dd,  $J = 9.0, 6.0$  Hz, 1 H), 3.76-3.72 (m, 4 H), 3.23 (ddd,  $J = 10.0, 10.0, 4.0$  Hz, 1 H), 2.58 (ddd,  $J = 12.5, 12.5, 3.5$  Hz, 1 H), 2.54-2.48 (m, 1 H), 2.34 (ddd,  $J = 13.0, 5.0, 5.0$  Hz, 1 H), 2.10 (bs, 2 H), 1.95-1.87 (m, 2 H), 1.76-1.69 (m, 3 H), 1.64-1.57 (m, 1 H), 1.33-1.18 (m, 11 H), 0.18 (s, 3 H);  $^{13}\text{C-NMR}$  (125 MHz,  $\text{CDCl}_3$ )  $\delta$  173.7, 146.5, 136.5, 80.7, 77.1, 65.8, 58.2, 58.2, 33.4, 31.0, 30.7, 29.0, 27.8, 25.5, 24.3, 23.9, 18.3, 18.3, -4.7; HRMS (ESI-TOF) calcd. for  $\text{C}_{19}\text{H}_{34}\text{O}_5\text{Si}$   $[\text{M}+\text{H}]^+$  371.22483, found 371.22591.

Protodesilylation of **14** generated **12b** with 52% yield.

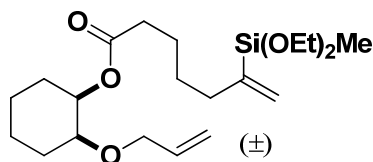

**(1*R*,2*S*)-2-(Allyloxy)cyclohexyl 6-(diethoxy(methyl)silyl)hept-6-enoate and its enantiomer (15a)**

Yield 80% (colorless oil); IR (neat,  $\text{cm}^{-1}$ ) 3051, 2971, 2938, 2866, 1733, 1449, 1388, 1365, 1257, 1238, 1168, 1104, 1081, 950;  $^1\text{H-NMR}$  (500 MHz,  $\text{CDCl}_3$ )  $\delta$  5.92-5.84 (m, 1 H), 5.68-5.67 (m, 1 H), 5.55-5.54 (m, 1 H), 5.28-5.24 (m, 1 H), 5.15-5.12 (m, 1 H), 5.09-5.08 (m, 1H), 4.05 (dd,  $J = 13.0, 5.8$  Hz, 1H ), 3.98 (dd,  $J = 13.2, 5.8$  Hz, 1 H), 3.76 (q,  $J = 7.0$  Hz, 4 H), 3.49-3.47 (m, 1 H), 2.35 (dd,  $J = 7.5, 7.5$  Hz, 2 H), 2.16 (dd,  $J = 7.5, 7.5$  Hz, 2 H), 1.91-1.86 (m, 1 H), 1.83-1.76 (m, 1 H), 1.71-1.62 (m, 3 H), 1.60-1.46 (m, 5 H), 1.43-1.29 (m, 2 H), 1.21 (dd,  $J = 7.0, 7.0$  Hz, 6 H), 0.18 (s, 3 H);  $^{13}\text{C-NMR}$  (125 MHz,  $\text{CDCl}_3$ )  $\delta$  173.3, 174.1, 135.3, 127.5, 116.5, 76.0, 71.0, 69.7, 58.2, 35.1, 34.6, 28.2, 27.9, 27.8, 24.9, 22.1, 21.7, 18.3, -4.6; HRMS (ESI-TOF) calcd. for  $\text{C}_{21}\text{H}_{38}\text{O}_5\text{Si}$   $[\text{M}+\text{Na}]^+$  421.23807, found 421.23908.

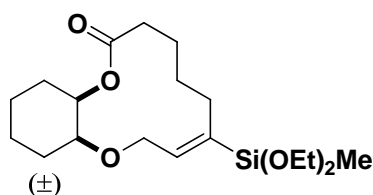

**(10aS,14aR,E)-7-(Diethoxy(methyl)silyl)-3,4,5,6,10a,11,12,13,14,14a-decahydrobenzo[b][1,4]dioxacyclododecin-2(9H)-one and its enantiomer (15)**

Yield 14% (colorless oil); IR (neat,  $\text{cm}^{-1}$ ) 2970, 2935, 2865, 1731, 1449, 1390, 1354, 1256, 1226, 1149, 1103, 1079, 986, 952;  $^1\text{H-NMR}$  (500 MHz,  $\text{CDCl}_3$ )  $\delta$  6.14 (dd,  $J = 6.5, 6.5$  Hz, 1 H), 5.06-5.05 (m, 1H), 4.19 (dd,  $J = 10.8, 6.5$  Hz, 1 H), 4.03 (dd,  $J = 10.8, 6.5$  Hz, 1 H), 3.77-3.72 (m, 4 H), 3.60-3.59 (m, 1 H), 2.46-2.40 (m, 2 H), 2.34 (ddd,  $J = 13.0, 5.5, 5.5$  Hz, 1 H), 2.08 (ddd,  $J = 12.2, 12.2, 5.0$  Hz, 1 H), 1.98-1.92 (m, 1 H), 1.84-1.71 (m, 3 H), 1.68-1.54 (m, 5 H), 1.50-1.28 (m, 3 H), 1.20 (dd,  $J = 7.5, 7.5$  Hz, 6 H), 0.18 (s, 3 H);  $^{13}\text{C-NMR}$  (125 MHz,  $\text{CDCl}_3$ )  $\delta$  174.0, 144.2, 137.3, 74.8, 72.3, 63.9, 58.2, 34.0, 29.7, 28.3, 28.1, 28.0, 27.4, 25.1, 22.3, 21.4, 18.3, -4.6; HRMS (ESI-TOF) calcd. for  $\text{C}_{19}\text{H}_{34}\text{O}_5\text{Si}$   $[\text{M}+\text{H}]^+$  371.22483, found 371.22603.

Protodesilylation of **15** generated **13b** with 54% yield.

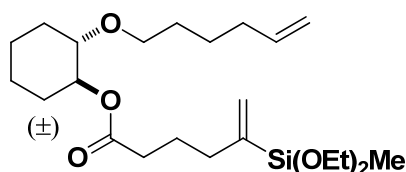

**(1S,2S)-2-(Hex-5-en-1-yloxy)cyclohexyl 5-(diethoxy(methyl)silyl)hex-5-enoate and its enantiomer (16a)**

Yield 73% (colorless oil); IR (neat,  $\text{cm}^{-1}$ ) 3076, 2972, 2938, 2866, 1735, 1641, 1452, 1389, 1256, 1165, 1109, 1082, 953;  $^1\text{H-NMR}$  (500 MHz,  $\text{CDCl}_3$ )  $\delta$  5.79 (dddd,  $J = 17.2, 10.2, 7.0, 7.0$  Hz, 1 H), 5.69-5.69 (m, 1 H), 5.58-5.58 (m, 1 H), 5.01-4.97 (m, 1 H), 4.94 (d,  $J = 10.0$  Hz, 1 H), 4.78-4.74 (m, 1 H), 3.76 (q,  $J = 7.0$  Hz, 4 H), 3.56-3.52 (m, 1 H), 3.44-3.39 (m, 1 H), 3.24-3.19 (m, 1 H), 2.30 (dd,  $J = 7.5, 7.5$  Hz, 2 H), 2.19 (dd,  $J = 7.5, 7.5$  Hz, 2 H), 2.05 (ddd,  $J = 7.0, 7.0, 7.0$  Hz, 2 H), 1.98-1.96 (m, 2 H), 1.82-1.76 (m, 2 H), 1.70-1.64 (m, 2 H), 1.56-1.50 (m, 2 H), 1.45-1.40 (m, 2 H), 1.36-1.31 (m, 3 H), 1.28-1.20 (m, 7 H), 0.20 (s, 3 H);  $^{13}\text{C-NMR}$  (125 MHz,  $\text{CDCl}_3$ )  $\delta$  172.9, 146.6, 138.8, 128.1, 114.4, 78.9, 74.6, 69.3, 58.2, 34.9, 34.2, 33.5, 29.8, 29.7,

29.6, 25.5, 24.1, 23.2, 18.3, -4.6; HRMS (ESI-TOF) calcd. for  $C_{23}H_{42}O_5Si$   $[M+Na]^+$  449.26937, found 449.27061.

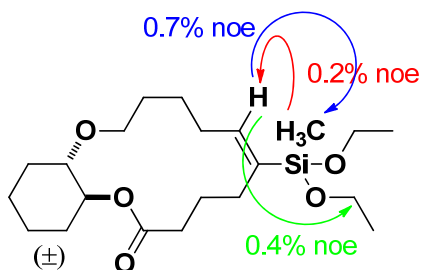

**(12aS,16aS,E)-6-(Diethoxy(methyl)silyl)-4,5,8,9,10,11,12a,13,14,15,16,16a-dodecahydrobenzo[b][1,4]dioxacyclotetradecin-2(3H)-one and its enantiomer (16)**

Yield 76% (pale yellow oil); IR (neat,  $cm^{-1}$ ) 2930, 2865, 2733, 1731, 1612, 1452, 1389, 1367, 1338, 1293, 1252, 1212, 1191, 1165, 1110, 1080, 1020, 989, 951;  $^1H$ -NMR (500 MHz,  $CDCl_3$ )  $\delta$  6.08 (dd,  $J = 7.0, 7.0$  Hz, 1H), 4.76 (ddd,  $J = 10.0, 10.0, 4.5$  Hz, 1 H), 3.80-3.71 (m, 5 H), 3.28-3.22 (m, 2 H), 2.38-2.12 (m, 6 H), 2.07-1.99 (m, 2 H), 1.88-1.82 (m, 1 H), 1.74-1.52 (m, 6 H), 1.43-1.36 (m, 1 H), 1.32-1.18 (m, 10 H), 0.16 (s, 3 H);  $^{13}C$ -NMR (125 MHz,  $CDCl_3$ )  $\delta$  173.2, 145.5, 135.4, 79.8, 75.2, 67.7, 58.1, 33.4, 30.9, 29.6, 28.5, 28.3, 27.4, 27.1, 24.4, 24.1, 24.0, 18.3, -4.4; HRMS (ESI-TOF) calcd. for  $C_{21}H_{38}O_5Si$   $[M+H]^+$  399.25613, found 399.25752.

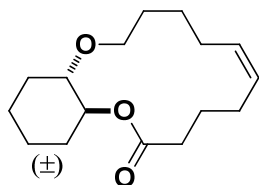

**(12aS,16aS,Z)-4,5,8,9,10,11,12a,13,14,15,16,16a-dodecahydrobenzo[b][1,4]dioxacyclotetradecin-2(3H)-one and its enantiomer (16b)**

Yield 60% (colorless oil), inseparable mixture with styrene; IR (neat,  $cm^{-1}$ ) 3002, 2936, 2861, 1731, 1452, 1368, 1246, 1207, 1162, 1111, 1022;  $^1H$ -NMR (500 MHz,  $CDCl_3$ )  $\delta$  5.51 (ddd,  $J = 8.5, 8.5, 8.5$  Hz, 1H), 5.24 (ddd,  $J = 10.0, 10.0, 6.5$  Hz, 1H), 4.80 (ddd,  $J = 10.0, 10.0, 5.0$  Hz, 1 H), 3.78-3.75 (m, 1 H), 3.25-3.20 (m, 2 H), 2.38-2.04 (m, 6 H), 1.99-1.83 (m, 3 H), 1.76-1.57 (m, 3 H), 1.55-1.37 (m, 4 H), 1.32-1.17 (m, 4 H);  $^{13}C$ -NMR (125 MHz,  $CDCl_3$ )  $\delta$  173.1, 131.6, 128.9, 79.8, 74.9, 66.9, 32.1, 30.9, 29.7, 28.3, 26.7, 26.6, 25.6, 24.1, 23.9, 23.7; HRMS (ESI-TOF) calcd. for  $C_{16}H_{26}O_3$   $[M+Na]^+$  289.17742, found 289.17804.

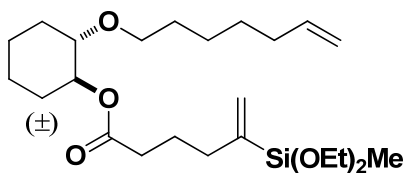

**(1S,2S)-2-(Hept-6-en-1-yloxy)cyclohexyl 5-(diethoxy(methyl)silyl)hex-5-enoate and its enantiomer (17a)**

Yield 79% (colorless oil); IR (neat,  $\text{cm}^{-1}$ ) 3077, 2973, 2937, 2865, 1736, 1641, 1452, 1389, 1256, 1166, 1110, 1082, 995, 953;  $^1\text{H-NMR}$  (500 MHz,  $\text{CDCl}_3$ )  $\delta$  5.80 (dddd,  $J = 17.0, 10.0, 6.8, 6.8$  Hz, 1 H), 5.69-5.69 (m, 1 H), 5.58-5.58 (m, 1 H), 5.01-4.97 (m, 1 H), 4.93 (d,  $J = 10.0$  Hz, 1 H), 4.76 (ddd,  $J = 8.5, 8.5, 4.5$  Hz, 1 H), 3.76 (q,  $J = 7.0$  Hz, 4 H), 3.53 (ddd,  $J = 9.0, 6.5, 6.5$  Hz, 1 H), 3.41 (ddd,  $J = 9.5, 7.0, 7.0$  Hz, 1 H), 3.21 (ddd,  $J = 8.5, 8.5, 4.0$  Hz, 1 H), 2.30 (dd,  $J = 7.2, 7.2$  Hz, 2 H), 2.19 (dd,  $J = 7.8, 7.8$  Hz, 2 H), 2.04 (ddd,  $J = 7.2, 7.2, 7.2$  Hz, 2 H), 1.98-1.96 (m, 2 H), 1.83-1.77 (m, 2 H), 1.70-1.64 (m, 2 H), 1.55-1.49 (m, 2 H), 1.42-1.20 (m, 14 H), 0.20 (s, 3 H);  $^{13}\text{C-NMR}$  (125 MHz,  $\text{CDCl}_3$ )  $\delta$  172.9, 146.6, 138.9, 128.1, 114.2, 78.9, 74.6, 69.5, 58.2, 34.9, 34.3, 33.7, 30.0, 29.8, 29.7, 28.7, 25.6, 24.1, 23.2, 18.3, -4.6; HRMS (ESI-TOF) calcd. for  $\text{C}_{24}\text{H}_{44}\text{O}_5\text{Si}$   $[\text{M}+\text{H}]^+$  441.30308, found 441.30151.

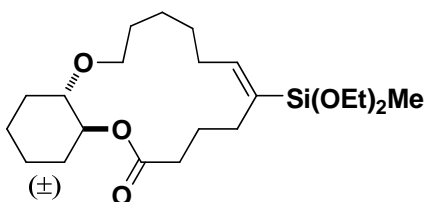

**(13aS,17aS,E)-6-(Diethoxy(methyl)silyl)-3,4,5,8,9,10,11,12,13a,14,15,16,17,17a-tetradecahydro-2H-benzo[*b*][1,4]dioxacyclopentadecin-2-one and its enantiomer (17)**

Yield 43% (pale yellow oil),  $Z:E = 8:92$ ,  $E$  product was purified and characterized.; IR (neat,  $\text{cm}^{-1}$ ) 2935, 2861, 1735, 1613, 1452, 1414, 1365, 1311, 1255, 1218, 1188, 1162, 1111, 1080, 1017, 988, 952;  $^1\text{H-NMR}$  (500 MHz,  $\text{CDCl}_3$ )  $\delta$  6.08 (dd,  $J = 10.5, 5.0$  Hz, 1 H), 4.72 (ddd,  $J = 10.0, 10.0, 4.3$  Hz, 1 H), 3.74 (q,  $J = 7.0$  Hz, 4 H), 3.68-3.65 (m, 1 H), 3.40-3.36 (m, 1 H), 3.15 (ddd, 9.5, 9.5, 4.5 Hz, 1 H), 2.55-2.49 (m, 1 H), 2.38-2.20 (m, 3 H), 2.12-2.07 (m, 2 H), 2.02-1.89 (m, 3 H), 1.72-1.62 (m, 4 H), 1.40-1.14 (m, 15 H), 0.17 (s, 3 H);  $^{13}\text{C-NMR}$  (125 MHz,  $\text{CDCl}_3$ )  $\delta$  173.3, 145.5, 135.3, 80.1, 76.4, 68.9, 58.1, 58.1, 32.4, 31.1, 31.0, 29.2, 28.8, 27.8, 27.3, 25.5, 24.2, 24.0, 23.5, 18.3, -4.3; HRMS (ESI-TOF) calcd. for  $\text{C}_{22}\text{H}_{40}\text{O}_5\text{Si}$   $[\text{M}+\text{H}]^+$  413.27178, found 413.27159.

Protodesilylation of **17** (mixture of  $Z$  and  $E$  isomers with a ratio of 8:92) gave rise to **17b** as an inseparable mixture of  $Z$  and  $E$  isomers with a ratio of 90:10 which is determined by  $^1\text{H}$  NMR analysis.

**19a** and **19** reported earlier as **1b** and **2b**.

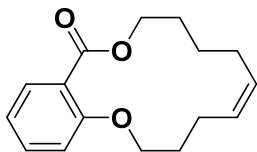

**(Z)-3,4,7,8,9,10-Hexahydrobenzo[*b*][1,5]dioxacyclotetradecin-12(2H)-one (19b)**

Protodesilylation of 91 mg **19** (0.22 mmol) followed by column chromatography (gradient 0 – 20% ethyl acetate/hexane) gave rise to 35 mg of the title compound. Yield 64% (colorless oil); IR (neat,  $\text{cm}^{-1}$ ) 3009,

2935, 2865, 1703, 1601, 1581, 1490, 1453, 1384, 1354, 1302, 1250, 1165, 1132, 1097, 1049, 1015, 975; <sup>1</sup>H-NMR (500 MHz, CDCl<sub>3</sub>) δ 7.78-7.76 (m, 1 H), 7.44-7.40 (m, 1 H), 6.98-6.93 (m, 2 H), 5.68 (dt, *J* = 10.0, 8.2 Hz, 1 H), 5.48 (dt, *J* = 10.0, 8.2 Hz, 1 H), 4.43 (t, *J* = 6.0 Hz, 2 H), 4.09 (t, *J* = 5.2 Hz, 2 H), 2.29 (dt, *J* = 7.8, 7.8 Hz, 2 H), 2.13-2.08 (m, 2 H), 1.85-1.79 (m, 4 H), 1.69-1.63 (m, 2 H); <sup>13</sup>C-NMR (125 MHz, CDCl<sub>3</sub>) δ 168.5, 157.5, 133.1, 132.2, 130.1, 130.0, 121.3, 120.0, 112.2, 66.9, 63.8, 29.8, 27.6, 25.7, 25.4, 23.5; HRMS (ESI-TOF) calcd. for C<sub>16</sub>H<sub>20</sub>O<sub>3</sub> [M+H]<sup>+</sup> 261.14852, found 261.14455.

**20a** and **20** reported earlier as **3b** and **4b**.

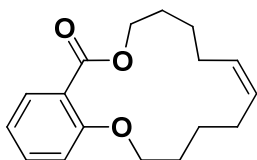

**(Z)-4,5,8,9,10,11-Hexahydro-2H-benzo[*b*][1,5]dioxacyclopentadecin-13(3H)-one (20b)**

Protodesilylation of **20** (60 mg, 0.14 mmol) followed by column chromatography (gradient 0 – 20% ethyl acetate/hexane) gave rise to 17 mg of the title compound. Yield 46% (colorless oil); IR (neat, cm<sup>-1</sup>) 3007, 2936, 2862, 1698, 1601, 1491, 1452, 1384, 1300, 1249, 1164, 1131, 1097, 1050, 958; <sup>1</sup>H-NMR (500 MHz, CDCl<sub>3</sub>) δ 7.71-7.69 (m, 1 H), 7.42-7.38 (m, 1 H), 6.97-6.94 (m, 1 H), 6.91 (d, *J* = 8.0 Hz, 1 H), 5.55 (dt, *J* = 10.8, 7.4 Hz, 1 H), 5.50 (dt, *J* = 10.8, 7.4 Hz, 1 H), 4.40 (t, *J* = 6.0 Hz, 2 H), 4.04 (t, *J* = 5.2 Hz, 2 H), 2.14-2.09 (m, 4 H), 1.85-1.77 (m, 4 H), 1.65-1.59 (m, 2 H), 1.58-1.52 (m, 2 H); <sup>13</sup>C-NMR (125 MHz, CDCl<sub>3</sub>) δ 168.3, 157.6, 132.7, 131.2, 130.3, 129.8, 121.5, 120.0, 112.3, 68.3, 64.5, 28.6, 27.9, 27.1, 26.9, 26.4, 26.0; HRMS (ESI-TOF) calcd. for C<sub>17</sub>H<sub>22</sub>O<sub>3</sub> [M+Na]<sup>+</sup> 297.14612, found 297.14667.

**Synthesis of compound 18 and 21**

Following the reported procedure,<sup>3</sup> the alkyne substrates were synthesized. Hydrosilylation of the alkynes gave rise to the corresponding alkenyl siloxane **18a** and **21a**, which were subjected to the RCM reaction.

**Note:** The <sup>1</sup>H and <sup>13</sup>C NMR spectra of many of these compounds were extremely complicated owing to the various combinations of rotamers, and conformers. Efforts to completely coalesce the resonances through variable temperature NMR (up to 110 °C) were unsuccessful. Despite their complexity, all spectra are for single compounds that were larger than 95% pure by LC/MS.

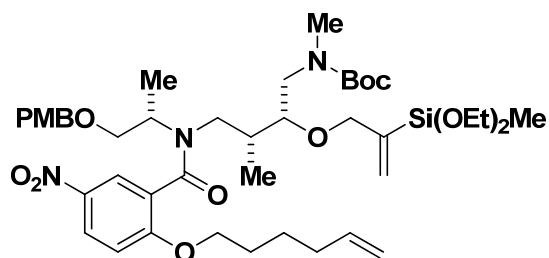

**tert-Butyl (2R,3R)-2-(2-(diethoxy(methyl)silyl)allyloxy)-4-(2-(hex-5-enyloxy)-N-((S)-1-(4-methoxybenzyloxy)propan-2-yl)-5-nitrobenzamido)-3-methylbutyl(methyl)carbamate (18a)**

Yield 69% (pale yellow oil); IR (neat,  $\text{cm}^{-1}$ ) 2973, 2932, 1693, 1640, 1612, 1588, 1516, 1458, 1391, 1365, 1341, 1272, 1251, 1160, 1078, 1036, 952; HRMS (ESI-TOF) calcd. for  $\text{C}_{43}\text{H}_{67}\text{N}_3\text{O}_{11}\text{Si}$   $[\text{M}+\text{Na}]^+$  852.44371, found 852.44396;  $[\alpha]_{\text{D}}^{21} = -25.5$  ( $c = 2.2$ ,  $\text{CHCl}_3$ ).

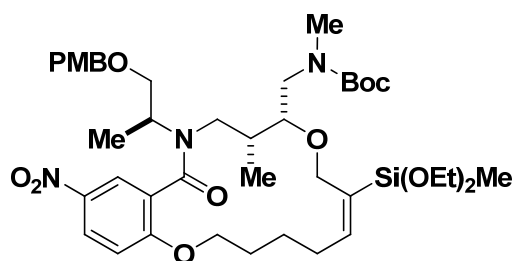

**tert-Butyl ((10R,11R,E)-7-(diethoxy(methyl)silyl)-13-((S)-1-(4-methoxybenzyloxy)propan-2-yl)-11-methyl-16-nitro-14-oxo-2,3,4,5,8,10,11,12,13,14-decahydrobenzo[b][1,9,5]dioxazacyclohexadecin-10-yl)methyl(methyl)carbamate (18)**

*Z/E* ratio is less than 1:99. Yield 47% (pale yellow oil); IR (neat,  $\text{cm}^{-1}$ ) 2972, 2934, 1692, 1633, 1614, 1588, 1516, 1468, 1392, 1365, 1341, 1302, 1271, 1251, 1159, 1105, 1080, 1036, 1010, 986, 953; HRMS (ESI-TOF) calcd. for  $\text{C}_{41}\text{H}_{63}\text{N}_3\text{O}_{11}\text{Si}$   $[\text{M}+\text{Na}]^+$  824.41241, found 824.41263;  $[\alpha]_{\text{D}}^{21} = -16.4$  ( $c = 7.6$ ,  $\text{CHCl}_3$ ).

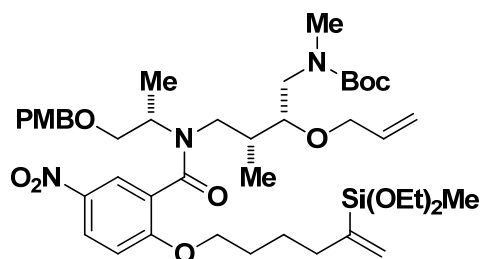

**tert-Butyl ((2R,3R)-2-(allyloxy)-4-(2-(((S)-1-(4-methoxybenzyl)oxy)hex-5-en-1-yl)oxy)-N-((S)-1-(4-methoxybenzyl)oxy)propan-2-yl)-5-nitrobenzamido)-3-methylbutyl(methyl)carbamate (21a)**

Yield 69% (pale yellow oil); IR (neat,  $\text{cm}^{-1}$ ) 2973, 2934, 1694, 1940, 1612, 1588, 1516, 1457, 1391, 1365, 1340, 1272, 1252, 1162, 1078, 1036, 952; HRMS (ESI-TOF) calcd. for  $\text{C}_{43}\text{H}_{67}\text{N}_3\text{O}_{11}\text{Si}$   $[\text{M}+\text{Na}]^+$  852.44371, found 852.44378;  $[\alpha]_{\text{D}}^{20} = -32.3$  ( $c = 2.4$ ,  $\text{CHCl}_3$ ).



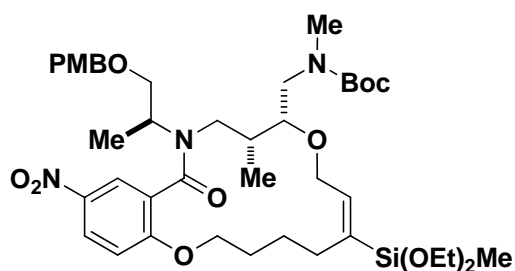

***tert*-Butyl (((10*R*,11*R*,*E*)-6-(diethoxy(methyl)silyl)-13-((*S*)-1-((4-methoxybenzyl)oxy)propan-2-yl)-11-methyl-16-nitro-14-oxo-2,3,4,5,8,10,11,12,13,14-decahydrobenzo[*b*][1,9,5]dioxazacyclohexadecin-10-yl)methyl)(methyl)carbamate (**21**)**

*Z/E* ratio is 14:86. Yield 44% (pale yellow oil); IR (neat,  $\text{cm}^{-1}$ ) 2972, 2934, 1689, 1636, 1612, 1588, 1515, 1463, 1391, 1365, 1340, 1273, 1252, 1164, 1104, 1078; HRMS (ESI-TOF) calcd. for  $\text{C}_{41}\text{H}_{63}\text{N}_3\text{O}_{11}\text{Si}$   $[\text{M}+\text{H}]^+$  802.43046, found 802.42662;  $[\alpha]_{\text{D}}^{22} = -29.8$  ( $c = 3.2$ ,  $\text{CHCl}_3$ ).

The simple diolefinic substrate was synthesized and subjected to RCM reaction using catalyst **A**. A mixture of both stereoisomers was obtained. The *Z/E* ratio was analyzed to be 36:64 using SFC/MS chromatography (**Figure S2**, first trace). SFC: Chiralpak<sup>®</sup> AD-H column; 25% *i*PrOH, 75% *sf*CO<sub>2</sub>, 10 minutes run length,  $t_{\text{R}}^{(\text{Z})} = 3.77$  min, area = 36%,  $t_{\text{R}}^{(\text{E})} = 5.12$  min, area = 64%.

In order to confirm the geometry of the double bond within alkenyl siloxane products **18** and **21**, protodesilylation reaction was performed to generate the simple olefins. The *Z/E* ratio of desilylated product **18b** from compound **18** was larger than 99:1 (**Figure S2**, third trace,  $t_{\text{R}}^{(\text{Z})} = 3.70$  min, area = 100%). Due to highly rotameric nature of compound **18b**, VT NMR was performed in  $\text{C}_6\text{D}_6$  at 80 °C. The coupling constant was measured to be 10.5 Hz which is characteristic of *Z* olefin. Since the protodesilylation reaction is stereospecific, the configuration of compound **18** was *E*. The *Z/E* ratio of desilylated product from compound **21** was 86:14 (**Figure S2**, second trace,  $t_{\text{R}}^{(\text{Z})} = 3.83$  min, area = 86%,  $t_{\text{R}}^{(\text{E})} = 5.33$  min, area = 14%), which indicated that the *Z/E* ratio of compound **21** is 14:86. In both cases, the siloxyl group was able to overcome the intrinsic selectivity favoring the formation of the *E* olefin. However, the positions of the siloxyl group had different influences on the selectivity of the olefin geometry within the product.

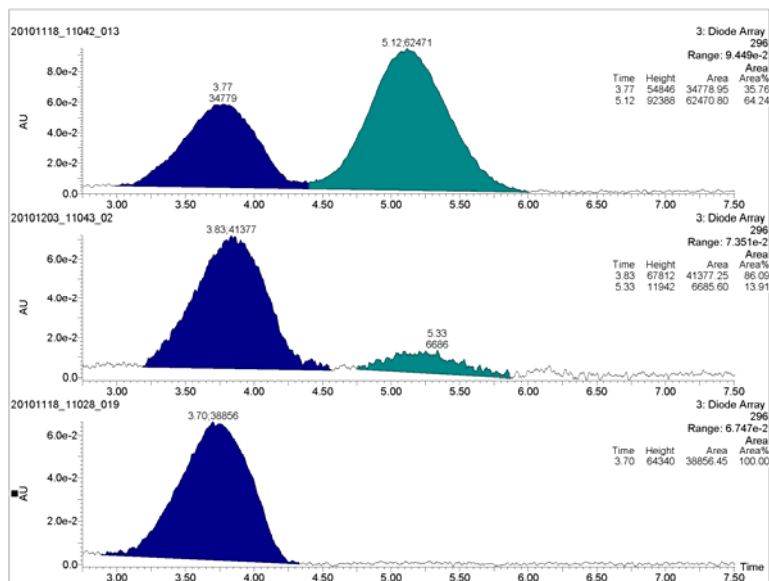

**Figure S2.** SFC/MS chromatography of olefin product from a) RCM of simple diolefinic substrate (first trace), b) protodesilylation of compound **21** (second trace), and c) protodesilylation of compound **18** (third trace).

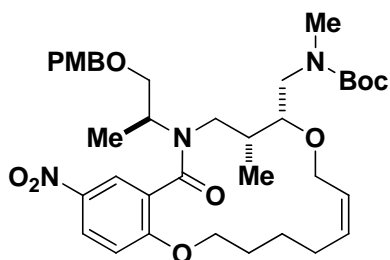

**tert-Butyl (((10R,11R,Z)-13-((S)-1-((4-methoxybenzyl)oxy)propan-2-yl)-11-methyl-16-nitro-14-oxo-2,3,4,5,8,10,11,12,13,14-decahydrobenzo[b][1,9,5]dioxazacyclohexadecin-10-yl)methyl)(methyl)carbamate (**18b**)**

Yield 86% (pale yellow oil); IR (neat,  $\text{cm}^{-1}$ ) 2936, 2862, 1690, 1633, 1588, 1515, 1464, 1392, 1366, 1341, 1272, 1250, 1159, 1104, 1036, 979; HRMS (ESI-TOF) calcd. for  $\text{C}_{36}\text{H}_{51}\text{N}_3\text{O}_9$   $[\text{M}+\text{Na}]^+$  692.35175, found 692.35064;  $[\alpha]_{\text{D}}^{21} = -9.9$  ( $c = 4.6$ ,  $\text{CHCl}_3$ ).

Protodesilylation of **21** generated **18b** with 60% yield

#### **F. Influence of the silyl group on the specificity and stereoselectivity of RCM reactions.**

Simple di-olefinic substrates were synthesized and subjected to two different reaction conditions: **I**, 20 mol% cat. **A**, 20 mol% 1,4-benzoquinone, toluene, 2 mM, 35 °C, 12 hours; **II**, 10 mol% Grubbs II, 20 mol% 1,4-benzoquinone, toluene, 2 mM, 35 °C, 12 hours. The reaction outcome was analyzed by proton NMR study of the crude mixture using  $\text{CDCl}_3$  or  $\text{C}_6\text{D}_6$  as solvent. Since the outcomes under both conditions are very similar, only expanded region of the proton NMR spectrum from condition **II** was shown here. The

resonance of the olefinic proton corresponding to the *cis* olefin was known from the protodesilylation of alkenyl siloxane intermediate. The resonance of the olefinic proton corresponding to the *trans* olefin was rigorously analyzed when the reaction is *trans* selective

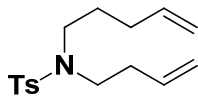

**N-(but-3-en-1-yl)-4-methyl-N-(pent-4-en-1-yl)benzenesulfonamide (22)**

IR (neat,  $\text{cm}^{-1}$ ) 3077, 2977, 2929, 2869, 1641, 1599, 1494, 1458, 1340, 1158, 1091, 993, 958;  $^1\text{H-NMR}$  (500 MHz,  $\text{CDCl}_3$ )  $\delta$  7.68 (d,  $J = 8.0$  Hz, 2 H), 7.28 (d,  $J = 8.0$  Hz, 2 H), 5.80-5.66 (m, 2 H), 5.06-4.96 (m, 4 H), 3.16 (t,  $J = 7.5$  Hz, 2 H), 3.11 (t,  $J = 7.5$  Hz, 2 H), 2.41 (s, 3 H), 2.28 (dt,  $J = 7.3, 7.3$  Hz, 2 H), 2.04 (dt,  $J = 7.1, 7.1$  Hz, 2 H), 1.63 (tt,  $J = 7.5, 7.5$  Hz, 2 H);  $^{13}\text{C-NMR}$  (125 MHz,  $\text{CDCl}_3$ )  $\delta$  143.0, 137.4, 136.9, 134.6, 129.6, 127.1, 117.0, 115.2, 47.9, 47.7, 33.3, 30.7, 27.8, 21.4; HRMS (ESI-TOF) calcd. for  $\text{C}_{16}\text{H}_{23}\text{NO}_2\text{S}$   $[\text{M}+\text{Na}]^+$  316.13417, found 316.13501.

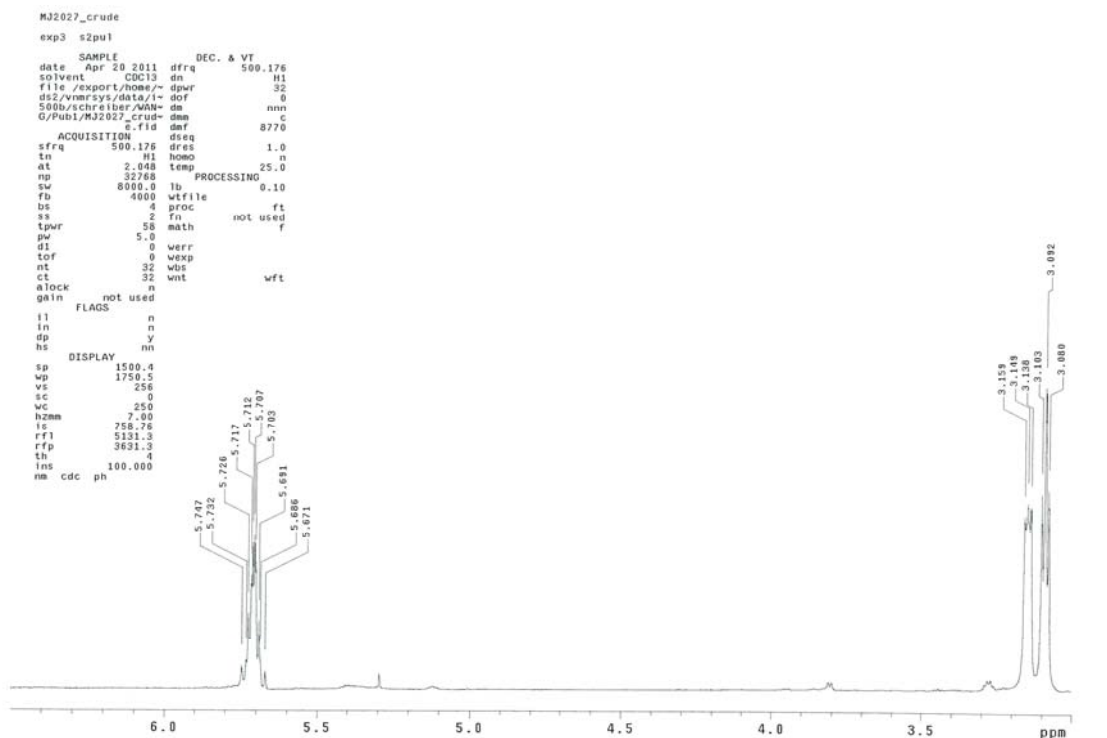

**Figure S3.**  $^1\text{H}$  NMR spectrum (expansion of 3.0 to 6.5 ppm) of reaction mixture of **22** under condition II.

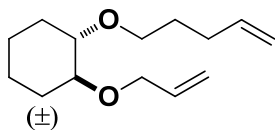

**(1S,2S)-1-(allyloxy)-2-(pent-4-en-1-yloxy)cyclohexane and its enantiomer (23)**

IR (neat,  $\text{cm}^{-1}$ ) 3078, 2934, 2861, 1642, 1450, 1366, 1315, 1271, 1243, 1208, 1161, 1106, 993;  $^1\text{H-NMR}$  (500 MHz,  $\text{CDCl}_3$ )  $\delta$  5.97-5.89 (m, 1 H), 5.86-5.78 (m, 1 H), 5.29-5.26 (m, 1 H), 5.14-5.12 (m, 1 H), 5.04-5.00 (m,

1 H), 4.96-4.94 (m, 1 H), 4.16-4.10 (m, 2 H), 3.60-3.52 (m, 2 H), 3.23-3.14 (m, 2 H), 2.15-2.11 (m, 2 H), 1.98-1.95 (m, 2 H), 1.68-1.62 (m, 4 H), 1.31-1.17 (m, 4 H); <sup>13</sup>C-NMR (125 MHz, CDCl<sub>3</sub>) δ 138.5, 135.8, 116.1, 114.5, 81.5, 80.8, 71.0, 69.2, 30.4, 30.2, 29.5, 23.6, 23.6; HRMS (ESI-TOF) calcd. for C<sub>14</sub>H<sub>24</sub>O<sub>2</sub> [M+Na]<sup>+</sup> 247.16685, found 247.16675.

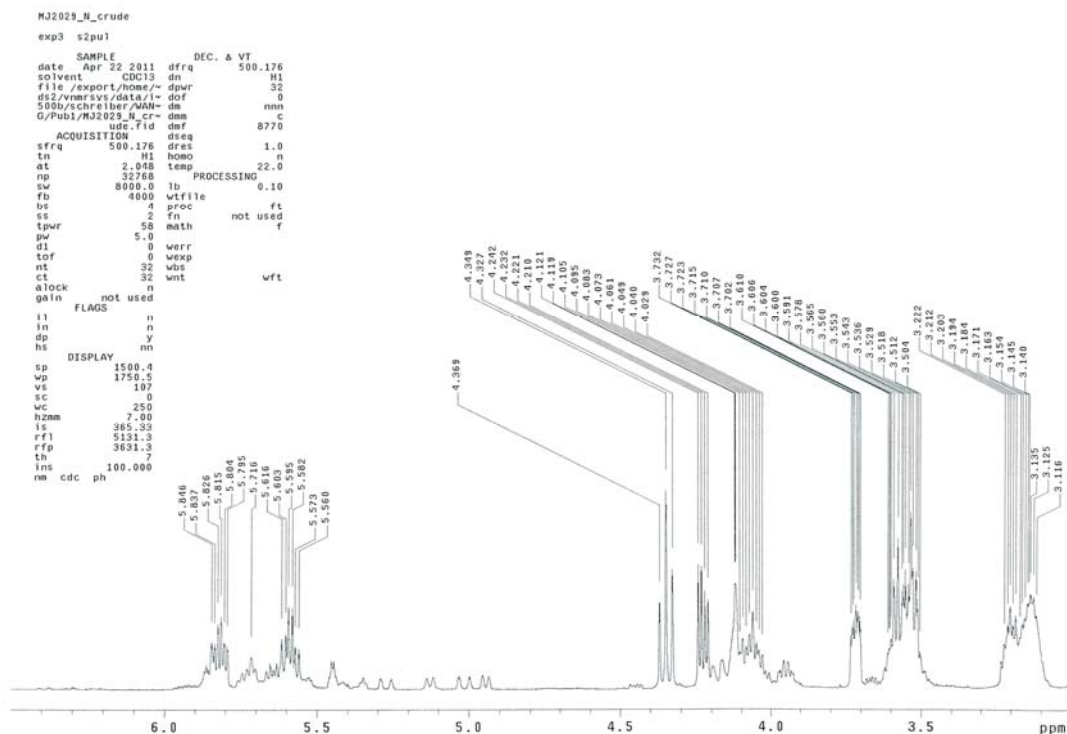

Figure S4. <sup>1</sup>H NMR spectrum (expansion of 3.0 to 6.5 ppm) of reaction mixture of **23** under condition II.

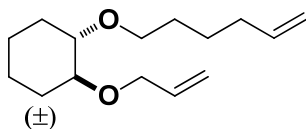

**(1S,2S)-1-(allyloxy)-2-(hex-5-en-1-yloxy)cyclohexane and its enantiomer (**24**)**

IR (neat, cm<sup>-1</sup>) 3077, 2933, 1642, 1450, 1366, 1244, 1098; <sup>1</sup>H-NMR (500 MHz, CDCl<sub>3</sub>) δ 5.97-5.89 (m, 1 H), 5.85-5.77 (m, 1 H), 5.29-5.26 (m, 1 H), 5.14-5.12 (m, 1 H), 5.01-4.98 (m, 1 H), 4.95-4.93 (m, 1 H), 4.16-4.08 (m, 2 H), 3.59-3.51 (m, 2 H), 3.22-3.14 (m, 2 H), 2.06 (ddd, *J* = 7.0, 7.0, 7.0 Hz, 2 H), 1.97-1.95 (m, 2 H), 1.64-1.55 (m, 4 H), 1.49-1.43 (m, 2 H), 1.31-1.17 (m, 4 H); <sup>13</sup>C-NMR (125 MHz, CDCl<sub>3</sub>) δ 138.9, 135.8, 116.1, 114.4, 81.5, 80.8, 71.1, 69.8, 33.4, 30.4, 30.2, 29.8, 25.5, 23.6, 23.6; HRMS (ESI-TOF) calcd. for C<sub>15</sub>H<sub>26</sub>O<sub>2</sub> [M+Na]<sup>+</sup> 261.18250, found 261.18388.



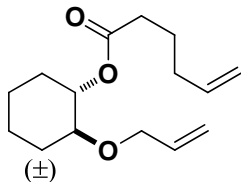

**(1*S*,2*S*)-2-(allyloxy)cyclohexyl hex-5-enoate and its enantiomer (25)**

IR (neat,  $\text{cm}^{-1}$ ) 3078, 2938, 2863, 1734, 1642, 1453, 1367, 1246, 1175, 1101, 994;  $^1\text{H-NMR}$  (500 MHz,  $\text{CDCl}_3$ )  $\delta$  5.90-5.74 (m, 2 H), 5.26-5.23 (m, 1 H), 5.13-5.11 (m, 1 H), 5.04-4.96 (m, 2 H), 4.80-4.75 (m, 1 H), 4.10-4.06 (m, 1 H), 4.02-3.98 (m, 1 H), 3.29 (ddd,  $J = 8.5, 8.5, 4.0$  Hz, 1 H), 2.31 (dd,  $J = 7.2, 7.2$  Hz, 2 H), 2.09 (ddd,  $J = 7.0, 7.0, 7.0$  Hz, 2 H), 2.00-1.97 (m, 2 H), 1.76-1.63 (m, 4 H), 1.40-1.20 (m, 4 H);  $^{13}\text{C-NMR}$  (125 MHz,  $\text{CDCl}_3$ )  $\delta$  172.9, 137.8, 135.3, 116.2, 115.2, 78.4, 74.8, 70.4, 33.9, 33.0, 29.9, 29.8, 24.1, 23.2; HRMS (ESI-TOF) calcd. for  $\text{C}_{15}\text{H}_{24}\text{O}_3$   $[\text{M}+\text{Na}]^+$  275.16177, found 275.16271.

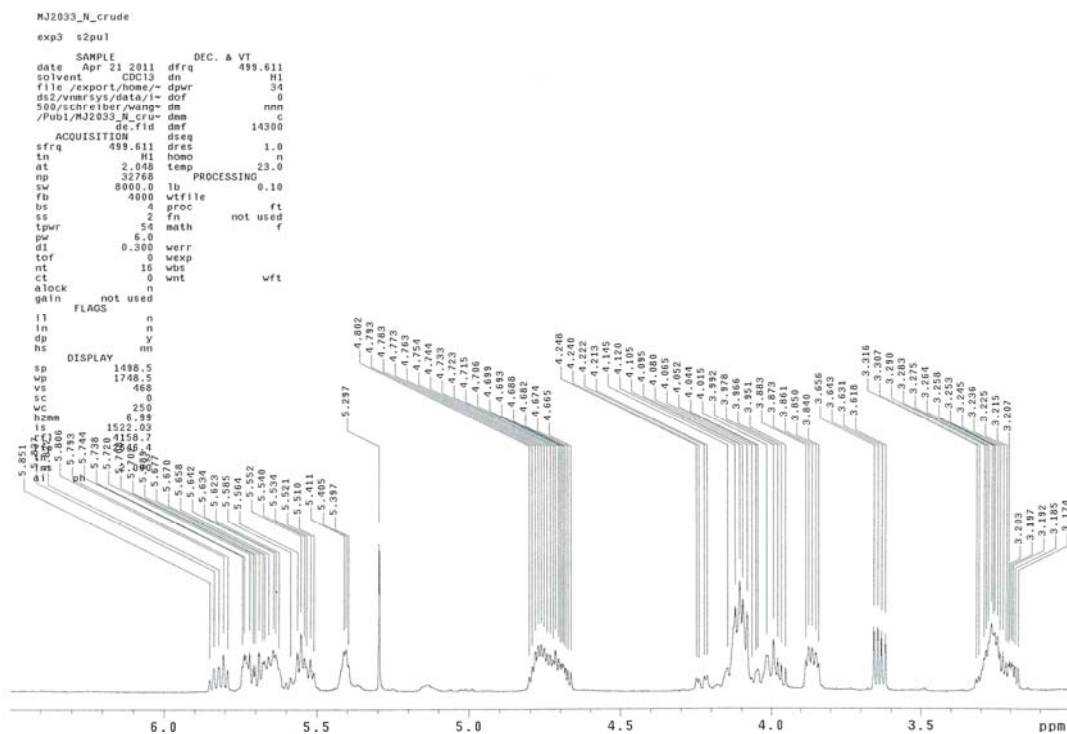

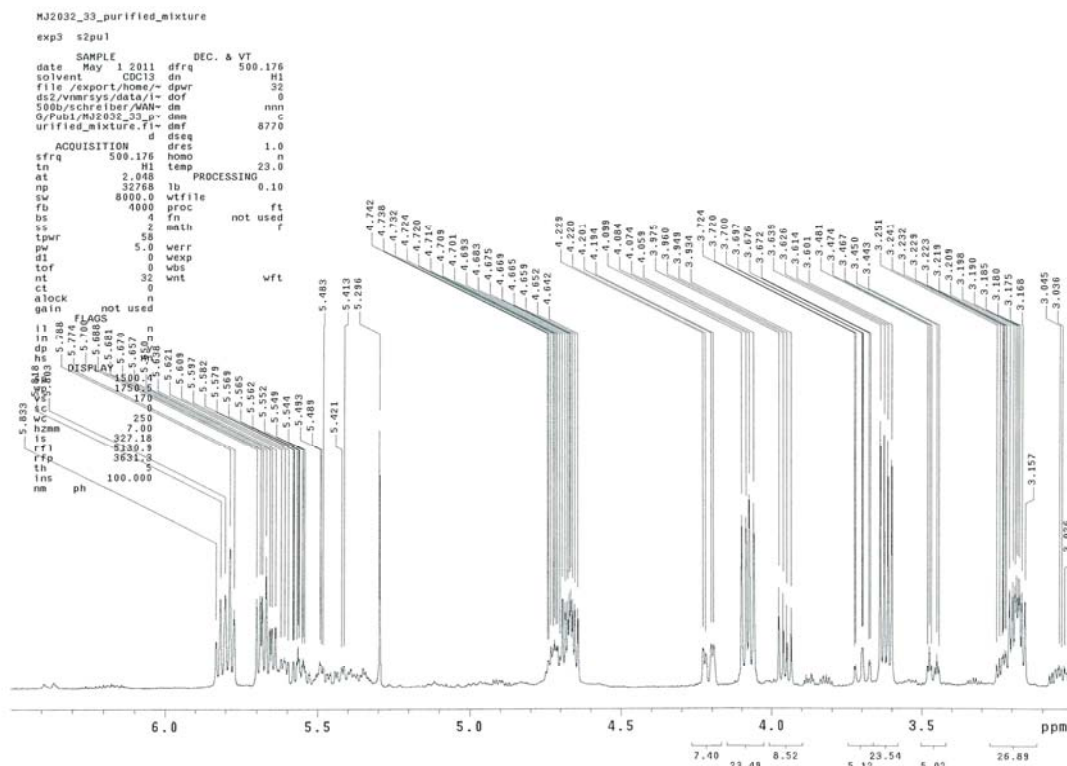

Figure S8.  $^1\text{H}$  NMR spectrum of purified monocyclized product mixture from reaction of **25** for ratio determination.

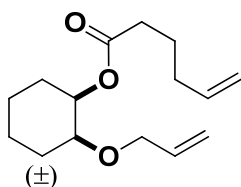

**(1R,2S)-2-(allyloxy)cyclohexyl hex-5-enoate and its enantiomer (26)**

IR (neat,  $\text{cm}^{-1}$ ) 3078, 2939, 2861, 1732, 1642, 1450, 1363, 1247, 1175, 1089, 994;  $^1\text{H}$ -NMR (500 MHz,  $\text{CDCl}_3$ )  $\delta$  5.91-5.83 (m, 1 H), 5.80-5.73 (m, 1 H), 5.27-5.23 (m, 1 H), 5.14-5.11 (m, 1 H), 5.10-5.08 (m, 1 H), 5.03-4.96 (m, 2 H), 4.04 (dd,  $J = 13.0, 5.5$  Hz, 1 H), 3.97 (dd,  $J = 13.0, 5.7$  Hz, 1 H), 3.47-3.46 (m, 1 H), 2.34 (dd,  $J = 7.5, 7.5$  Hz, 2 H), 2.11-2.07 (m, 2 H), 1.90-1.85 (m, 1 H), 1.81-1.64 (m, 4 H), 1.60-1.46 (m, 3 H), 1.42-1.27 (m, 2 H);  $^{13}\text{C}$ -NMR (125 MHz,  $\text{CDCl}_3$ )  $\delta$  173.1, 137.8, 135.2, 116.5, 115.2, 76.0, 70.9, 69.6, 33.9, 33.0, 27.9, 27.8, 24.2, 22.1, 21.6; HRMS (ESI-TOF) calcd. for  $\text{C}_{15}\text{H}_{24}\text{O}_3$   $[\text{M}+\text{Na}]^+$  275.16177, found 275.16316.

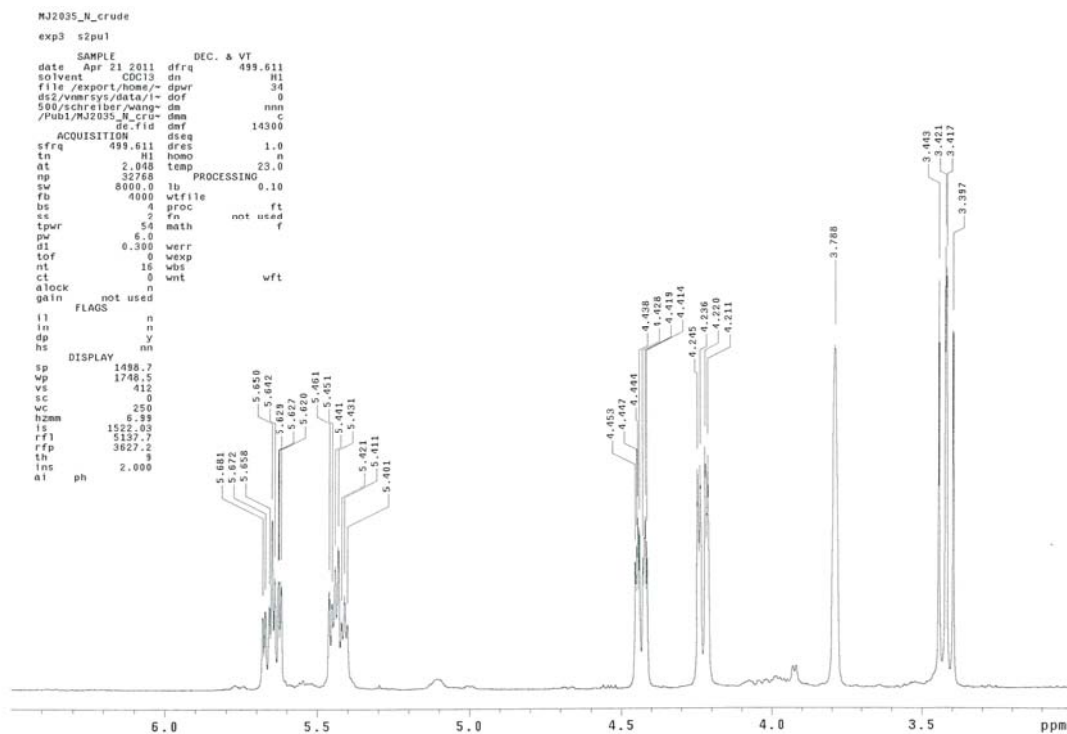

**Figure S9.**  $^1\text{H}$  NMR spectrum (expansion of 3.0 to 6.5ppm) of reaction mixture of **26** under condition II (the major product was purifiable and is reported as **26b**).

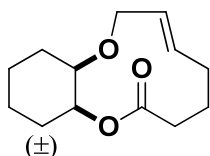

**(9aR,13aS,E)-3,4,5,8,9a,10,11,12,13,13a-decahydro-2H-benzo[b][1,4]dioxacycloundecin-2-one and its enantiomer (26b)**

Yield 73% (colorless oil); IR (neat,  $\text{cm}^{-1}$ ) 2934, 2858, 1725, 1443, 1363, 1256, 1210, 1159, 1139, 1109, 1089, 1073, 1047, 980;  $^1\text{H}$ -NMR (500 MHz,  $\text{CDCl}_3$ )  $\delta$  5.64 (ddd,  $J = 15.0, 10.5, 4.0$  Hz, 1 H), 5.42 (ddd,  $J = 15.0, 10.2, 5.5$  Hz, 1 H), 4.44-4.40 (m, 1 H), 4.23-4.20 (dd,  $J = 13.0, 4.2$  Hz, 1 H), 3.77 (bs, 1 H), 3.40 (dd,  $J = 12.5, 11.0$  Hz, 1 H), 2.38-2.29 (m, 2 H), 2.12-2.07 (m, 1 H), 1.99-1.70 (m, 6 H), 1.56-1.47 (m, 2 H), 1.41-1.23 (m, 3 H);  $^{13}\text{C}$ -NMR (125 MHz,  $\text{CDCl}_3$ )  $\delta$  174.9, 132.0, 132.0, 75.1, 74.9, 72.2, 34.4, 33.6, 30.6, 25.8, 24.5, 24.2, 19.4; HRMS (ESI-TOF) calcd. for  $\text{C}_{13}\text{H}_{20}\text{O}_3$   $[\text{M}+\text{H}]^+$  225.14852, found 225.16079.

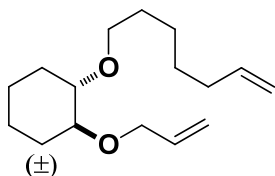

**(1S,2S)-1-(allyloxy)-2-(hept-6-en-1-yloxy)cyclohexane and its enantiomer (27)**



IR (neat,  $\text{cm}^{-1}$ ) 3077, 2932, 2859, 1642, 1451, 1365, 1314, 1270, 1244, 1208, 1161, 1107, 994;  $^1\text{H-NMR}$  (500 MHz,  $\text{CDCl}_3$ )  $\delta$  5.97-5.89 (m, 1 H), 5.84-5.76 (m, 1 H), 5.29-5.25 (m, 1 H), 5.14-5.12 (m, 1 H), 5.01-4.97 (m, 1 H), 4.94-4.91 (m, 1H), 4.16-4.08 (m, 2 H), 3.59-3.50 (m, 2 H), 3.22-3.13 (m, 2 H), 2.07-2.03 (m, 2 H), 1.96-1.95 (m, 2 H), 1.65-1.54 (m, 4 H), 1.44-1.33 (m, 4 H), 1.30-1.15(m, 4 H);  $^{13}\text{C-NMR}$  (125 MHz,  $\text{CDCl}_3$ )  $\delta$  139.0, 135.8, 116.0, 114.2, 81.6, 80.8, 71.1, 69.9, 33.7, 30.4, 30.2, 30.2, 28.8, 25.7, 23.6, 23.6; HRMS (ESI-TOF) calcd. for  $\text{C}_{16}\text{H}_{28}\text{O}_2$   $[\text{M}+\text{Na}]^+$  275.19815, found 275.19975.

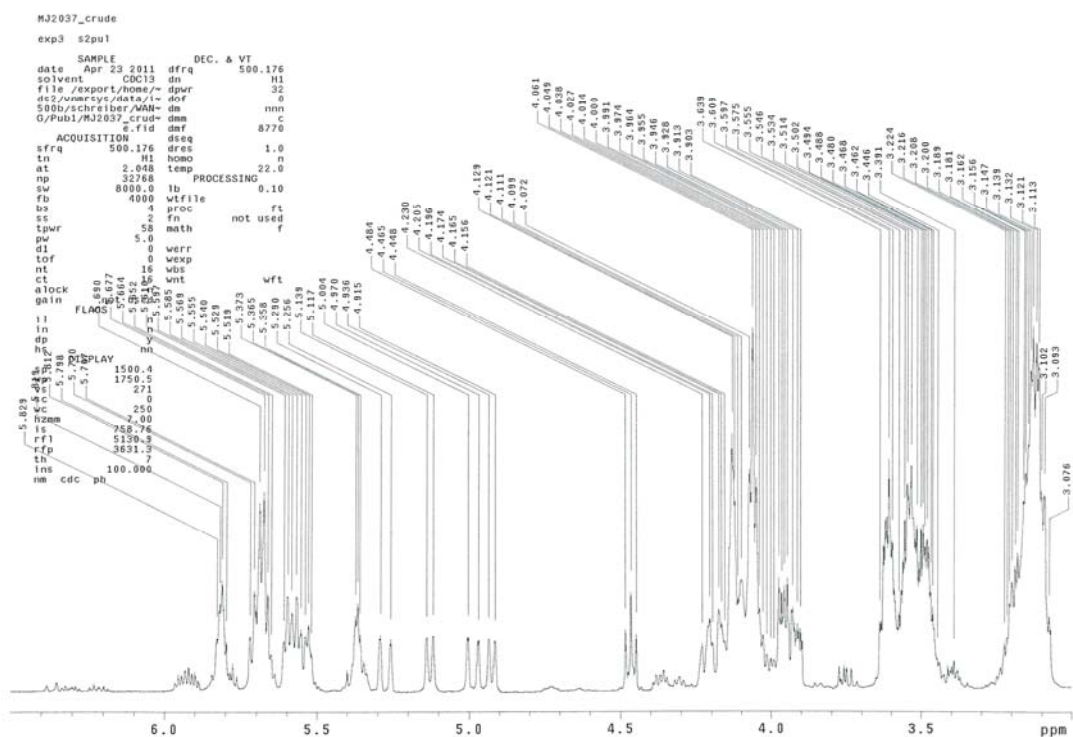

Figure S10.  $^1\text{H-NMR}$  spectrum (expansion of 3.0 to 6.5ppm) of reaction mixture of **27** under condition II.

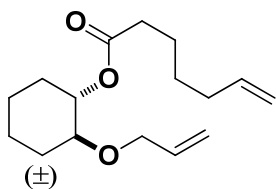

**(1S,2S)-2-(allyloxy)cyclohexyl hept-6-enoate and its enantiomer (28)**

IR (neat,  $\text{cm}^{-1}$ ) 3078, 2937, 2863, 1735, 1641, 1453, 1353, 1174, 1101, 994;  $^1\text{H-NMR}$  (500 MHz,  $\text{CDCl}_3$ )  $\delta$  5.90-5.74 (m, 2 H), 5.26-5.23 (m, 1 H), 5.13-5.11 (m, 1 H), 5.01-4.98 (m, 1 H), 4.95-4.93 (m, 1 H), 4.77 (ddd,  $J = 8.5, 8.5, 5.0$  Hz, 1 H), 4.08 (dd,  $J = 7.8, 5.0$  Hz, 1 H), 4.00 (dd,  $J = 7.8, 5.0$  Hz, 1 H), 3.29 (ddd,  $J = 8.5, 8.5, 4.0$  Hz, 1 H), 2.30 (dd,  $J = 7.2, 7.2$  Hz, 2 H), 2.08-2.04 (m, 2 H), 1.99-1.97 (m, 2 H), 1.70-1.61 (m, 4 H), 1.46-1.20 (m, 6 H);  $^{13}\text{C-NMR}$  (125 MHz,  $\text{CDCl}_3$ )  $\delta$  173.0, 138.4, 135.3, 116.2, 114.6, 78.5, 74.8, 70.4, 34.5, 33.4, 29.9, 29.8, 28.3, 24.5, 23.2; HRMS (ESI-TOF) calcd. for  $\text{C}_{16}\text{H}_{26}\text{O}_3$   $[\text{M}+\text{Na}]^+$  289.17742, found 289.17766.

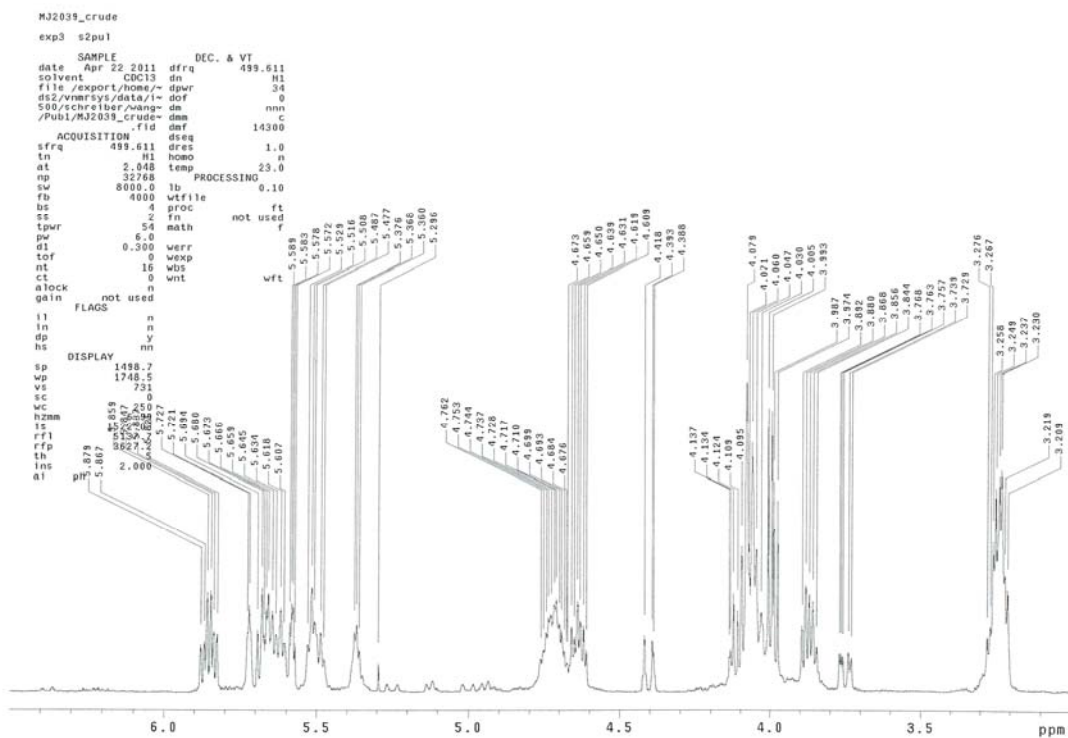



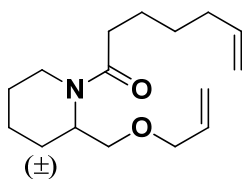

**(±)-1-(2-((allyloxy)methyl)piperidin-1-yl)hept-6-en-1-one (30)**

IR (neat,  $\text{cm}^{-1}$ ) 3076, 2934, 2859, 1642, 1426, 1357, 1243, 1178, 1134, 1104, 1057, 1028, 992; The  $^1\text{H}$  and  $^{13}\text{C}$  NMR spectra of many of this compound was complicated owing to the combination of rotamers. HRMS (ESI-TOF) calcd. for  $\text{C}_{16}\text{H}_{27}\text{NO}_2$   $[\text{M}+\text{Na}]^+$  288.19340, found 288.19396.

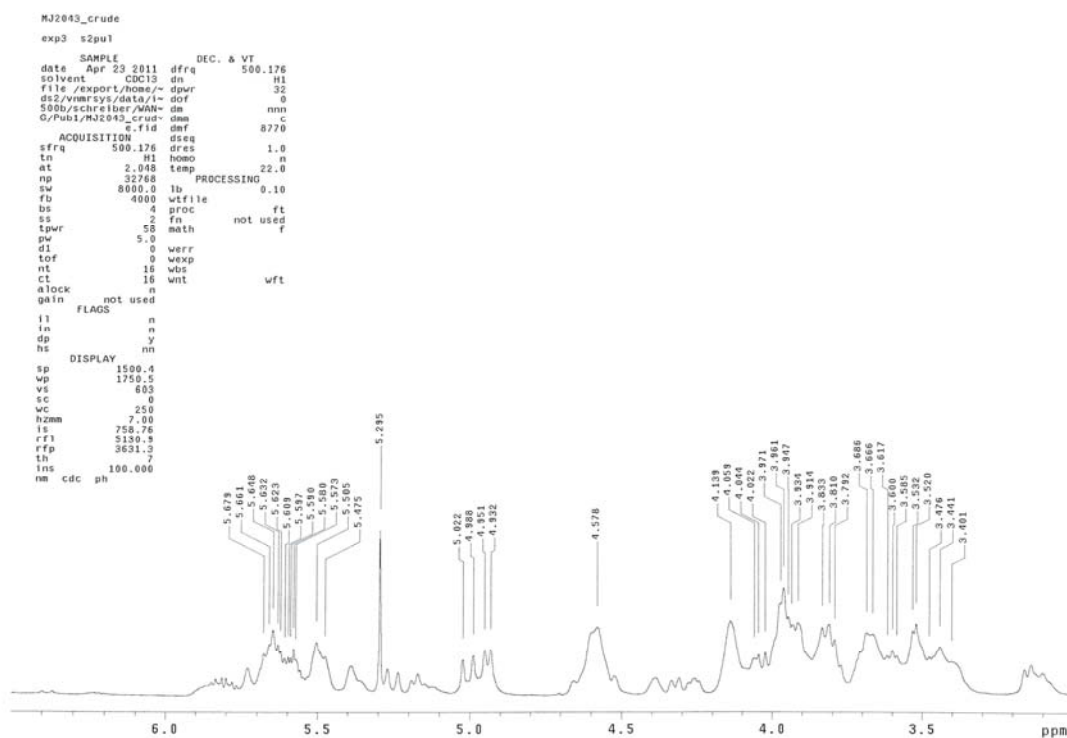

**Figure S14.**  $^1\text{H}$  NMR spectrum (expansion of 3.0 to 6.5 ppm) of reaction mixture of **30** under condition II.

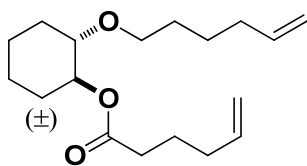

**(1S,2S)-2-(hex-5-en-1-yloxy)cyclohexyl hex-5-enoate and its enantiomer (31)**

IR (neat,  $\text{cm}^{-1}$ ) 3077, 2936, 2862, 1734, 1641, 1453, 1369, 1175, 1111;  $^1\text{H}$ -NMR (500 MHz,  $\text{CDCl}_3$ )  $\delta$  5.83-5.74 (m, 2 H), 5.04-4.92 (m, 4 H), 4.75 (ddd,  $J = 9.0, 9.0, 4.5$  Hz, 1 H), 3.54 (ddd,  $J = 9.0, 6.5, 6.5$  Hz, 1 H), 3.40 (ddd,  $J = 9.0, 6.5, 6.5$  Hz, 1 H), 3.21 (ddd,  $J = 8.5, 8.5, 4.0$  Hz, 1 H), 3.32-2.29 (m, 2 H), 2.11-2.02 (m, 4 H), 2.00-1.95 (m, 2 H), 1.76-1.63 (m, 4 H), 1.56-1.50 (m, 2 H), 1.46-1.38 (m, 2 H), 1.37-1.19 (m, 4 H);  $^{13}\text{C}$ -

NMR (125 MHz, CDCl<sub>3</sub>) δ 172.9, 138.8, 137.8, 115.2, 114.4, 79.0, 74.7, 69.3, 33.9, 33.5, 33.0, 29.8, 29.6, 25.5, 24.2, 23.3; HRMS (ESI-TOF) calcd. for C<sub>18</sub>H<sub>30</sub>O<sub>3</sub> [M+Na]<sup>+</sup> 317.20872, found 317.20928.

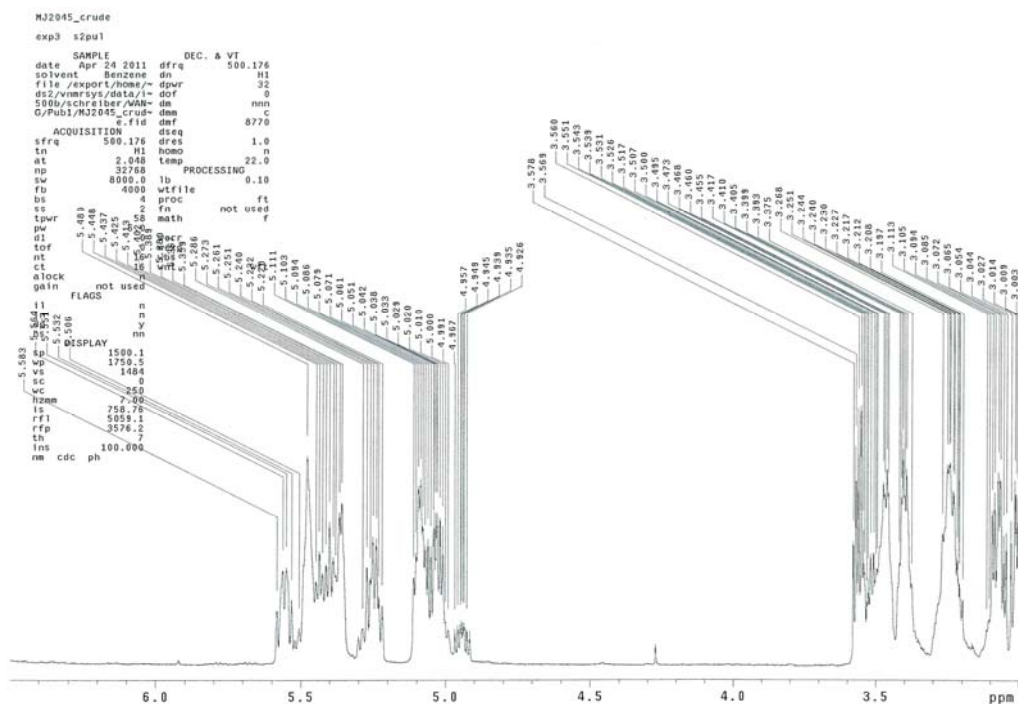

Figure S15. <sup>1</sup>H NMR spectrum (expansion of 3.0 to 6.5ppm) of reaction mixture of **31** under condition II.

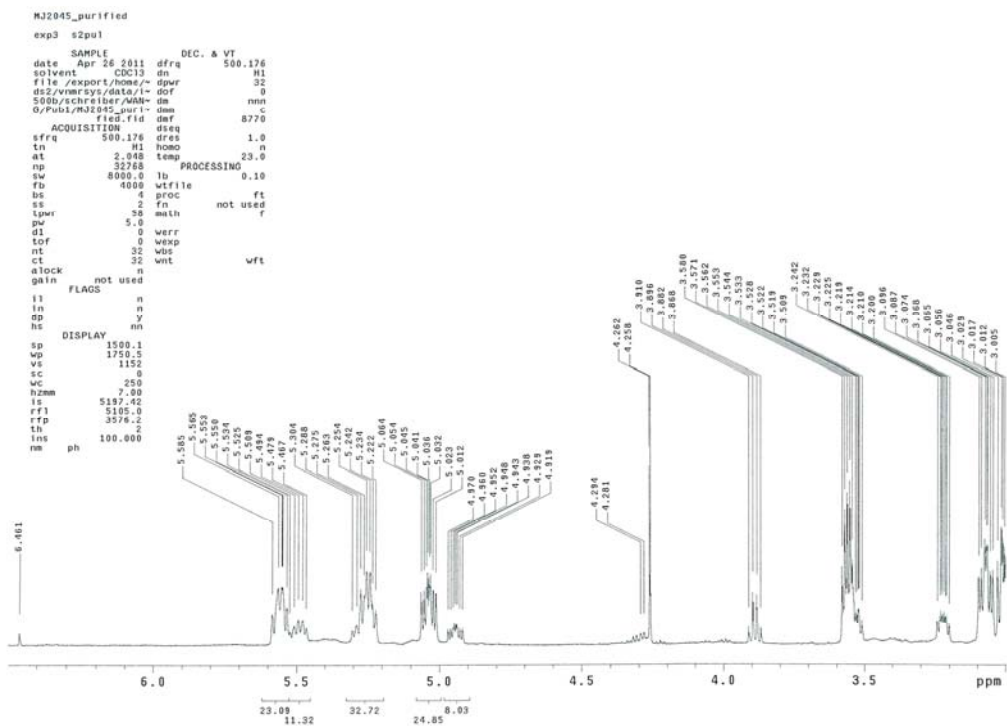

Figure S16. <sup>1</sup>H NMR spectrum of purified monocyclized product mixture from reaction of **31** for ratio determination.

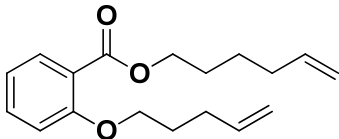

**Hex-5-en-1-yl 2-(pent-4-en-1-yloxy)benzoate (32)**

IR (neat,  $\text{cm}^{-1}$ ) 3077, 2976, 2940, 2870, 1728, 1704, 1641, 1601, 1583, 1491, 1469, 1452, 1416, 1386, 1302, 1251, 1164, 1133, 1080, 1049, 1013, 995;  $^1\text{H-NMR}$  (500 MHz,  $\text{CDCl}_3$ )  $\delta$  7.78-7.76 (m, 1 H), 7.44-7.41 (m, 1 H), 6.98-6.94 (m, 2 H), 5.89-5.77 (m, 2 H), 5.08-4.95 (m, 4 H), 4.30 (t,  $J = 7.0$  Hz, 2 H), 4.04 (t,  $J = 6.5$  Hz, 2 H), 2.30-2.25 (m, 2 H), 2.14-2.09 (m, 2 H), 1.96-1.90 (m, 2 H), 1.80-1.74 (m, 2 H), 1.58-1.52 (m, 2 H);  $^{13}\text{C-NMR}$  (125 MHz,  $\text{CDCl}_3$ )  $\delta$  166.7, 158.4, 138.4, 137.7, 133.1, 131.5, 120.9, 120.0, 115.2, 114.8, 113.1, 68.0, 64.7, 33.3, 30.0, 28.3, 28.2, 25.3; HRMS (ESI-TOF) calcd. for  $\text{C}_{18}\text{H}_{24}\text{O}_3$   $[\text{M}+\text{Na}]^+$  311.16177, found 311.16440.

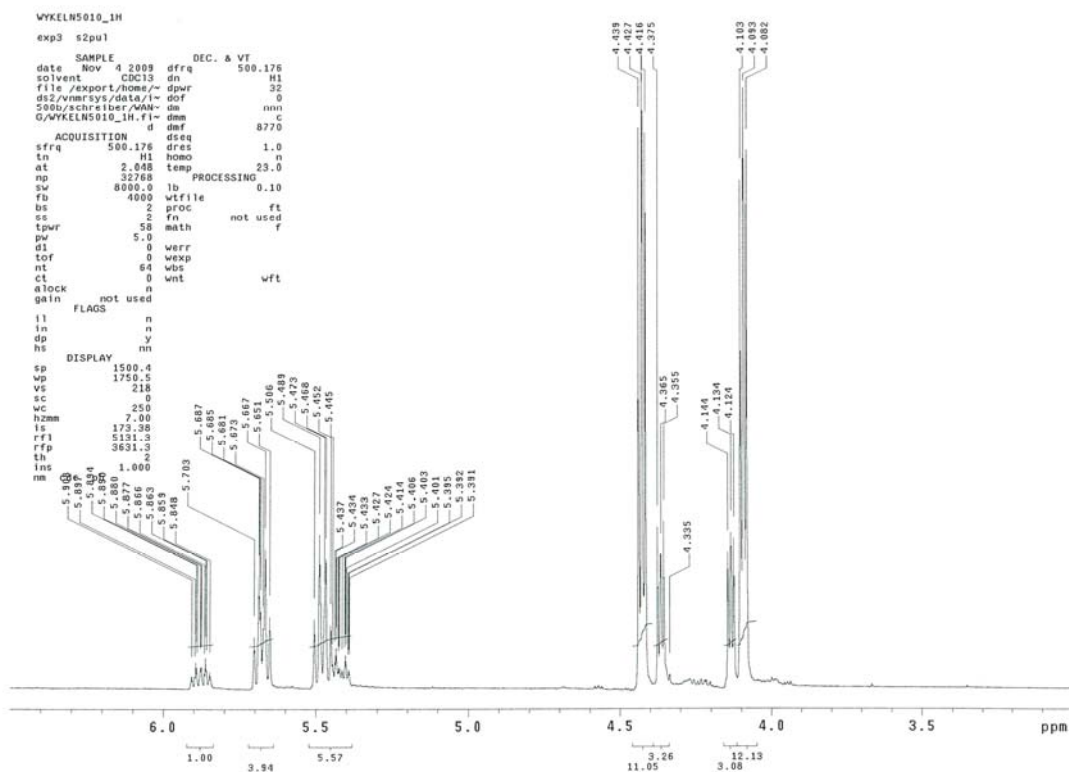

**Figure S17.**  $^1\text{H}$  NMR spectrum (expansion of 3.0 to 6.5 ppm) of reaction mixture of **32** under condition II.

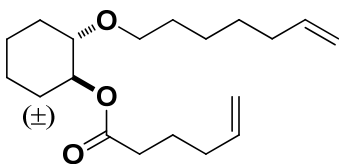

**(1S,2S)-2-(hept-6-en-1-yloxy)cyclohexyl hex-5-enoate and its enantiomer (33)**

IR (neat,  $\text{cm}^{-1}$ ) 3077, 2934, 2861, 1734, 1641, 1452, 1417, 1369, 1247, 1175, 1111, 1026, 994;  $^1\text{H-NMR}$  (500 MHz,  $\text{CDCl}_3$ )  $\delta$  5.83-5.74 (m, 2 H), 5.04-4.91 (m, 4 H), 4.75 (ddd,  $J = 9.0, 9.0, 4.5$  Hz, 1 H), 3.53 (ddd,  $J = 9.5, 6.5, 6.5$  Hz, 1 H), 3.39 (ddd,  $J = 9.0, 7.0, 7.0$  Hz, 1 H), 3.20 (ddd,  $J = 9.0, 9.0, 4.0$  Hz, 1 H), 2.32-2.29 (m, 2 H), 2.11-2.07 (m, 2 H), 2.05-2.01 (m, 2 H), 1.99-1.95 (m, 2 H), 1.76-1.63 (m, 4 H), 1.54-1.49 (m, 2 H), 1.41-1.19 (m, 8 H);  $^{13}\text{C-NMR}$  (125 MHz,  $\text{CDCl}_3$ )  $\delta$  172.9, 138.9, 137.8, 115.2, 114.2, 79.0, 74.8, 69.5, 33.9, 33.7, 33.0, 30.0, 29.8, 28.7, 25.6, 24.2, 23.3; HRMS (ESI-TOF) calcd. for  $\text{C}_{19}\text{H}_{32}\text{O}_3$   $[\text{M}+\text{H}]^+$  309.24242, found 309.24229.

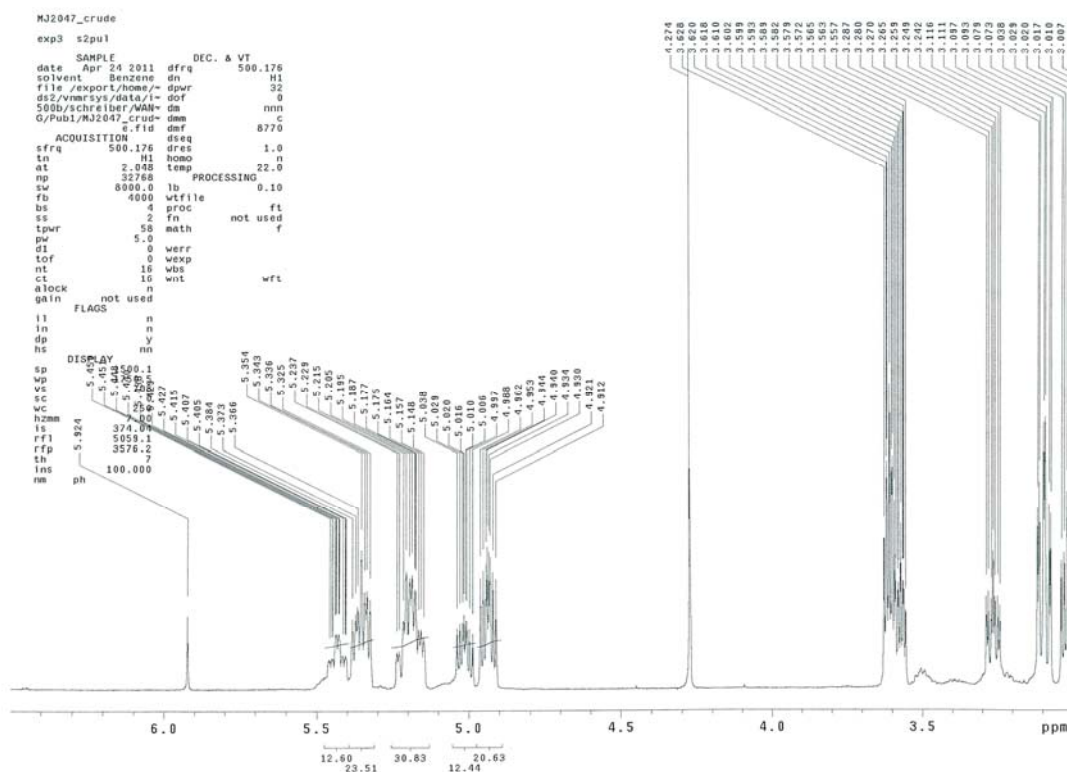

**Figure S18.**  $^1\text{H-NMR}$  spectrum (expansion of 3.0 to 6.5 ppm) of reaction mixture of **33** under condition II.

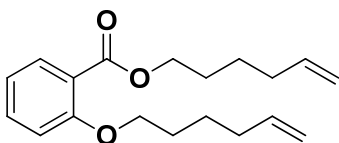

**Hex-5-en-1-yl 2-(hex-5-en-1-yloxy)benzoate (34)**

IR (neat,  $\text{cm}^{-1}$ ) 3076, 2937, 2862, 1728, 1704, 1640, 1601, 1583, 1491, 1469, 1453, 1386, 1302, 1250, 1164, 1133, 1079, 1049, 995, 953;  $^1\text{H-NMR}$  (500 MHz,  $\text{CDCl}_3$ )  $\delta$  7.78-7.76 (m, 1 H), 7.44-7.41 (m, 1 H), 6.97-6.94 (m, 2 H), 5.87-5.78 (m, 2 H), 5.05-5.01 (m, 2 H), 4.98-4.96 (m, 2 H), 4.30 (t,  $J = 6.8$  Hz, 2 H), 4.03 (t,  $J = 6.5$

Hz, 2 H), 2.15-2.10 (m, 4 H), 1.85 (tt,  $J = 7.1, 7.1$  Hz, 2 H), 1.77 (tt,  $J = 7.2, 7.2$  Hz, 2 H), 1.63-1.52 (m, 4 H);  $^{13}\text{C}$ -NMR (125 MHz,  $\text{CDCl}_3$ )  $\delta$  166.7, 158.4, 138.5, 138.4, 133.1, 131.5, 120.8, 120.0, 114.8, 114.7, 113.0, 68.6, 64.7, 33.4, 33.3, 28.6, 28.2, 25.3, 25.2; HRMS (ESI-TOF) calcd. for  $\text{C}_{19}\text{H}_{26}\text{O}_3$   $[\text{M}+\text{Na}]^+$  325.17742, found 325.17910.

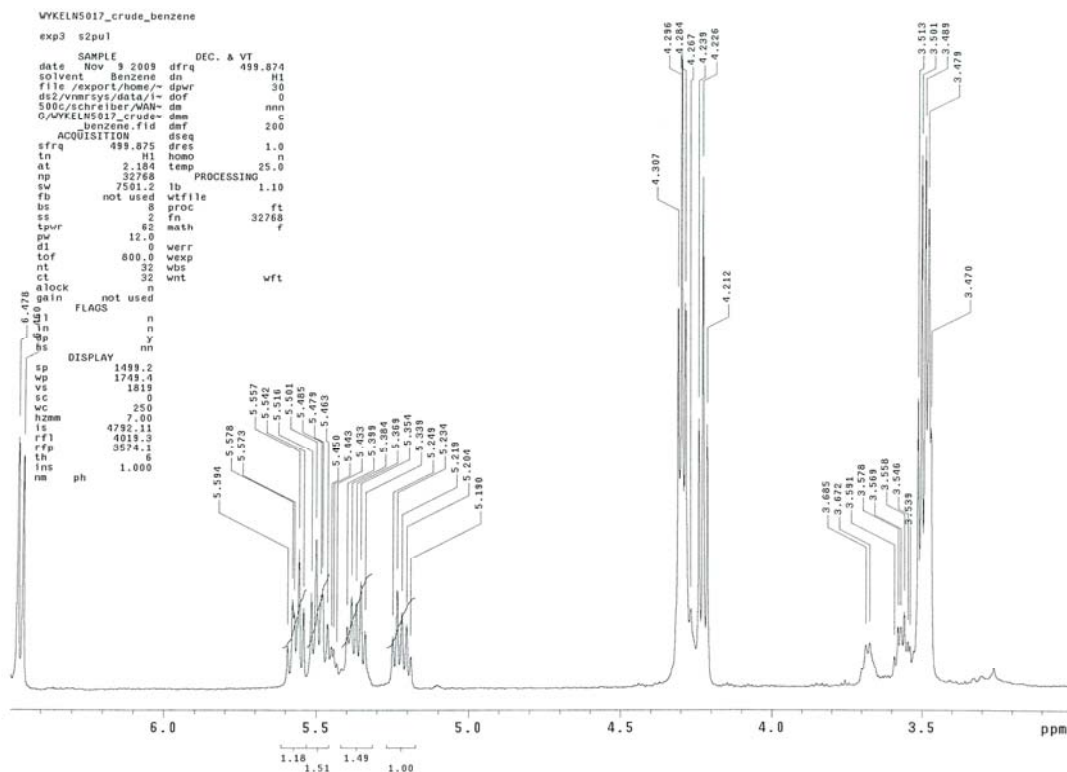

Figure S19.  $^1\text{H}$  NMR spectrum (expansion of 3.0 to 6.5ppm) of reaction mixture of **34** under condition II.

## References.

- (1) (a) Trost, B. M.; Ball, Z. T. *J. Am. Chem. Soc.* **2005**, *127*, 17644-17655. (b) Trost, B. M.; Ball, Z. T. *J. Am. Chem. Soc.* **2001**, *123*, 12726-12727.
- (2) (a) Furstner, A.; Radkowski, K. *Chem. Commun.* **2002**, 2182-2183. (b) Lacombe, F.; Radkowski, K.; Seidel, G.; Furstner, A. *Tetrahedron* **2004**, *60*, 7315-7324.
- (3) Marcaurrelle, L. A.; Comer, E.; Dandapani, S.; Duvall, J. R.; Gerard, B.; Kesavan, S.; Lee, M. D.; Liu, H.; Lowe, J. T.; Marie, J.-C.; Mulrooney, C. A.; Pandya, B. A.; Rowley, A.; Ryba, T. D.; Suh, B.-C.; Wei, J.; Young, D. W.; Akella, L. B.; Ross, N. T.; Zhang, Y.-L.; Fass, D. M.; Reis, S. A.; Zhao, W.-N.; Haggarty, S. J.; Palmer, M.; Foley, M. A. *J. Am. Chem. Soc.* **2010**, *132*, 16962-16976.



WYKELN5006\_1H

exp2 s2pu1

SAMPLE DEC. & VT  
date Mar 28 2010 dfrq 499.874  
solvent CDC13 dn H1  
file /export/home/~  
1500c/vnmrsvs/data-  
/schreiber/WANG/Pu-  
b1/WYKELN5006\_1H.f-  
id dmf 200  
ACQUISITION  
sfrq 499.875 dseq 1.0  
tn H1 dres n  
at 2.184 homo 23.0  
np 32768 DEC2  
sw 7501.2 dfrq2 0  
fb not used dn2 1  
bs 4 dpwr2 0  
ss 2 dof2 n  
tpwr 62 dm2 c  
pw 12.0 dmm2 200  
d1 0 dmf2 1.0  
tof 800.0 dseq2 n  
nt 32 dres2 n  
ct 32 homo2  
alock n DEC3  
gain not used dfrq3 0  
FLAGS dn3 1  
il n dpwr3 0  
in n dof3 n  
dp y dm3 c  
hs nn dmm3 200  
DISPLAY dmf3 200  
sp -250.2 dseq3 1.0  
wp 4998.6 dres3 n  
vs 102 homo3  
sc 0  
wc 250 lb 1.10  
hzmm 19.99 wfile  
is 446.53 proc ft  
rfl 4089.4 fn 32768  
rfp 3629.1 math f  
th 1  
ins 2.000 werr  
nm ph wexp  
wbs  
wnt

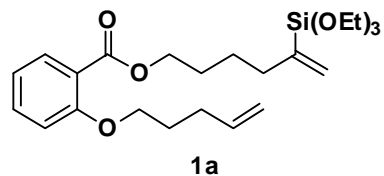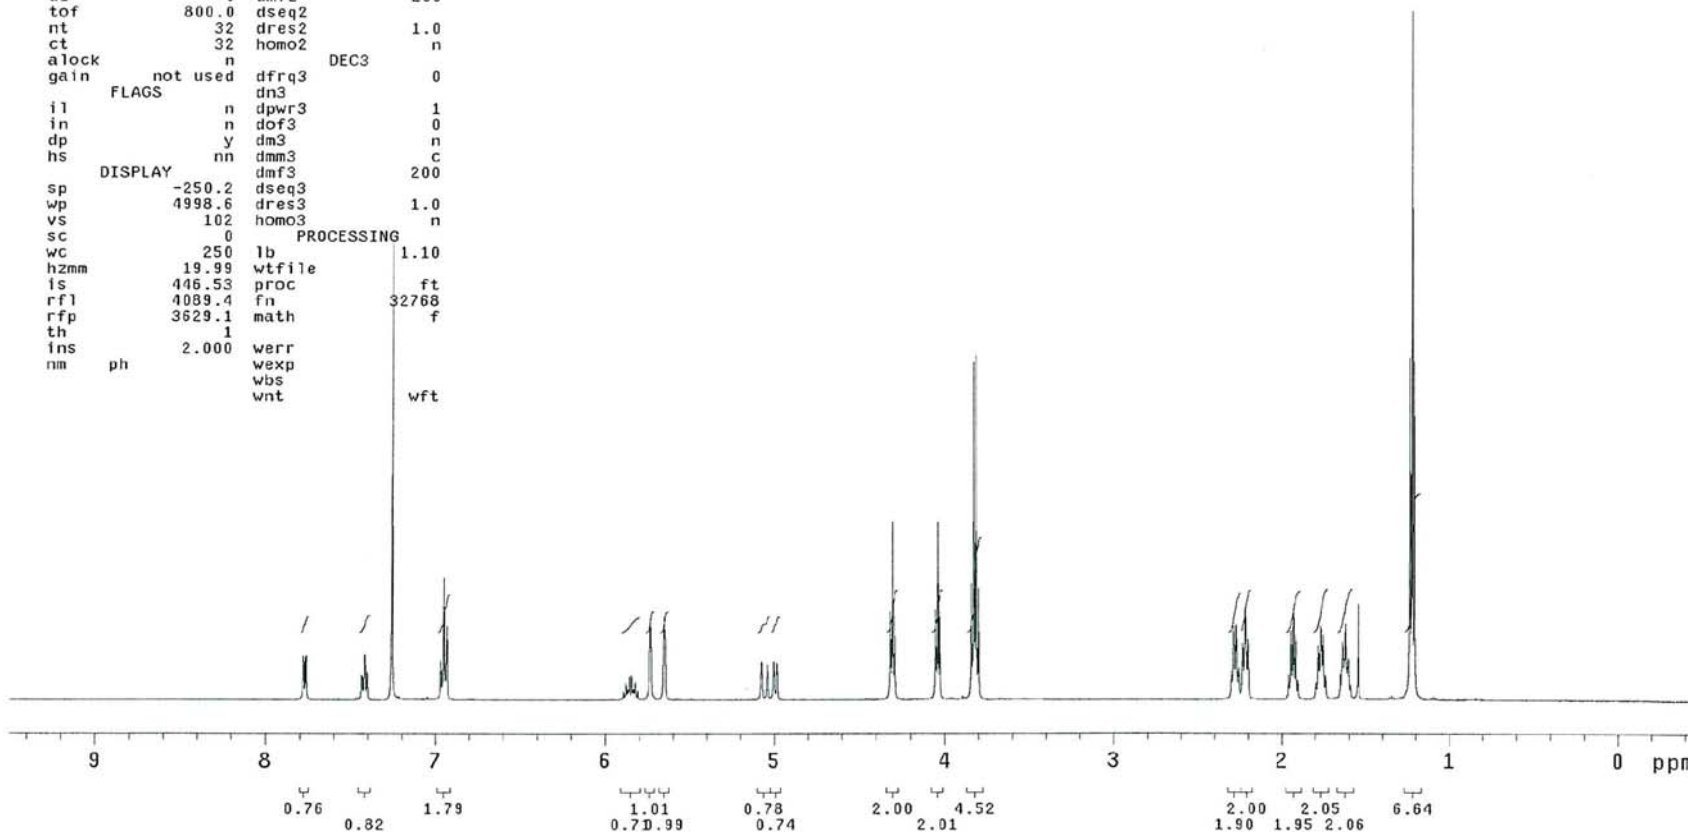

WYKELN5006\_13C

exp2 s2pu1

| SAMPLE      |             | DEC. & VT |          |
|-------------|-------------|-----------|----------|
| date        | Oct 29 2009 | dfrq      | 499.874  |
| solvent     | CDC13       | dn        | H1       |
| file        | exp         | dpwr      | 49       |
| ACQUISITION |             |           |          |
| sfrq        | 125.707     | dm        | YYY      |
| tn          | C13         | dmm       | w        |
| at          | 1.092       | dmf       | 12000    |
| np          | 65536       | dseq      |          |
| sw          | 29996.3     | dres      | 1.0      |
| fb          | not used    | homo      | n        |
| bs          | 8           | temp      | 25.0     |
| tpwr        | 55          | DEC2      |          |
| pw          | 4.2         | dfrq2     | 0        |
| d1          | 0           | dn2       |          |
| tof         | 2000.0      | dpwr2     | 1        |
| nt          | 9999        | dof2      | 0        |
| ct          | 1008        | dm2       | n        |
| alock       | not used    | dmm2      | c        |
| gain        | not used    | dmf2      | 10000    |
| FLAGS       |             |           |          |
| il          | n           | dres2     | 1.0      |
| in          | n           | homo2     | n        |
| dp          | y           | DEC3      |          |
| hs          | nn          | dfrq3     | 0        |
| DISPLAY     |             |           |          |
| sp          | -1087.8     | dn3       |          |
| wp          | 29995.3     | dpwr3     | 1        |
| vs          | 37          | dof3      | 0        |
| sc          | 0           | dm3       | n        |
| wc          | 250         | dmm3      | c        |
| h2mm        | 119.98      | dmf3      | 10000    |
| is          | 500.00      | dseq3     |          |
| rf1         | 10767.1     | dres3     | 1.0      |
| rfp         | 9678.3      | homo3     | n        |
| PROCESSING  |             |           |          |
| th          | 2           | lb        | 1.00     |
| ins         | 100.000     | wtfile    |          |
| nm          | cdc ph      | proc      | ft       |
|             |             | fn        | not used |
|             |             | math      | f        |
|             |             | werr      |          |
|             |             | wexp      |          |
|             |             | wbs       |          |
|             |             | wnt       |          |

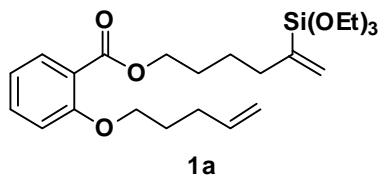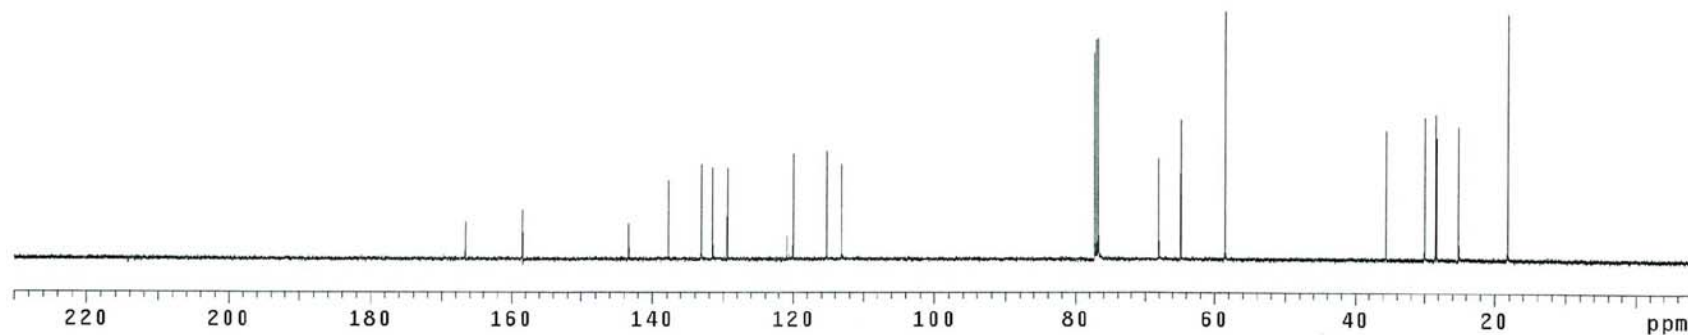

S50



WYKELN5089\_13C\_benzene

exp2 s2pu1

| SAMPLE      |            | DEC. & VT |          |
|-------------|------------|-----------|----------|
| date        | Jan 6 2010 | dfrq      | 499.874  |
| solvent     | Benzene    | dn        | H1       |
| file        | exp        | dpwr      | 49       |
| ACQUISITION |            |           |          |
| sfrq        | 125.707    | dm        | yyy      |
| tn          | C13        | dmm       | w        |
| at          | 1.092      | dmf       | 12000    |
| np          | 65536      | dseq      |          |
| sw          | 29996.3    | dres      | 1.0      |
| fb          | not used   | homo      | n        |
| bs          | 8          | temp      | 25.0     |
| tpwr        | 55         | DEC2      |          |
| pw          | 4.2        | dfrq2     | 0        |
| d1          | 0          | dn2       |          |
| tof         | 2000.0     | dpwr2     | 1        |
| nt          | 99999      | dof2      | 0        |
| ct          | 0          | dm2       | n        |
| alock       | n          | dmm2      | c        |
| gain        | not used   | dmf2      | 10000    |
| FLAGS       |            |           |          |
| il          | n          | dres2     | 1.0      |
| in          | n          | homo2     | n        |
| dp          | y          | DEC3      |          |
| hs          | nn         | dfrq3     | 0        |
| DISPLAY     |            |           |          |
| sp          | -1043.3    | dn3       |          |
| wp          | 29995.3    | dpwr3     | 1        |
| vs          | 84         | dof3      | 0        |
| sc          | 0          | dm3       | n        |
| wc          | 250        | dmm3      | 10000    |
| hzmm        | 119.98     | dmf3      |          |
| is          | 500.00     | dseq3     |          |
| rfl         | 17132.9    | dres3     | 1.0      |
| rfp         | 16088.7    | homo3     | n        |
| PROCESSING  |            |           |          |
| th          | 4          | lb        | 1.00     |
| ins         | 100.000    | wtfile    |          |
| nm          | cdc ph     | proc      | ft       |
|             |            | fn        | not used |
|             |            | math      | f        |
|             |            | werr      |          |
|             |            | wexp      |          |
|             |            | wbs       |          |
|             |            | wnt       |          |

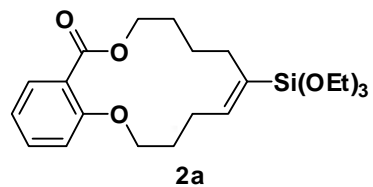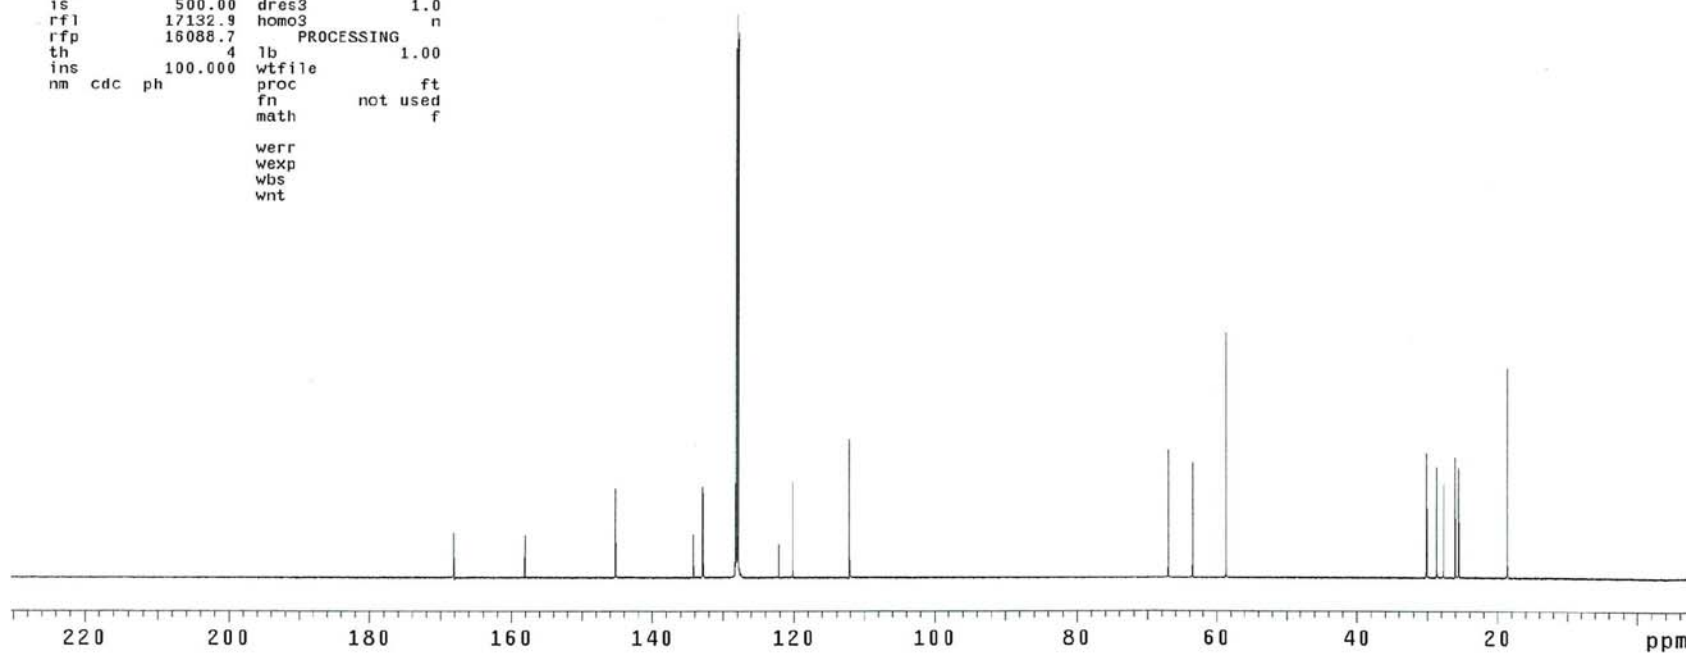

S52

WYKELN5121\_1H

exp1 s2pu1

| SAMPLE      |             | DEC. & VT  |         |
|-------------|-------------|------------|---------|
| date        | Mar 28 2010 | dfrq       | 499.874 |
| solvent     | CDCl3       | dn         | H1      |
| file        | exp         | dpwr       | 30      |
| ACQUISITION |             | dof        | 0       |
| sfrq        | 499.875     | dm         | nnn     |
| tn          | H1          | dmm        | c       |
| at          | 2.184       | dmf        | 200     |
| np          | 32768       | dseq       |         |
| sw          | 7501.2      | dres       | 1.0     |
| fb          | not used    | homo       | n       |
| bs          | 4           | temp       | 23.0    |
| ss          | 2           | DEC2       |         |
| tpwr        | 62          | dfrq2      | 0       |
| pw          | 12.0        | dn2        |         |
| d1          | 0           | dpwr2      | 1       |
| tof         | 800.0       | dof2       | 0       |
| nt          | 32          | dm2        | n       |
| ct          | 32          | dmm2       | c       |
| alock       | n           | dmf2       | 200     |
| gain        | not used    | dseq2      |         |
| FLAGS       |             | dres2      | 1.0     |
| il          | n           | homo2      | n       |
| in          | n           | DEC3       |         |
| dp          | y           | dfrq3      | 0       |
| hs          | nn          | dn3        |         |
| DISPLAY     |             | dpwr3      | 1       |
| sp          | -460.3      | dof3       | 0       |
| wp          | 4998.6      | dm3        | n       |
| vs          | 75          | dmm3       | c       |
| sc          | 0           | dmf3       | 200     |
| wc          | 250         | dseq3      |         |
| hzmm        | 19.99       | dres3      | 1.0     |
| is          | 423.85      | homo3      | n       |
| rfl         | 460.8       | PROCESSING |         |
| rfp         | 0           | lb         | 1.10    |
| th          | 1           | wtfile     |         |
| ins         | 2.000       | proc       | ft      |
| nm          | ph          | fn         | 32768   |
|             |             | math       | f       |
|             |             | werr       |         |
|             |             | wexp       |         |
|             |             | wbs        |         |
|             |             | wnt        | wft     |

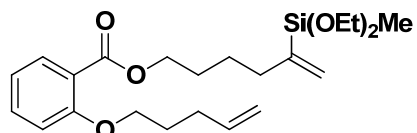

1b also as 19a

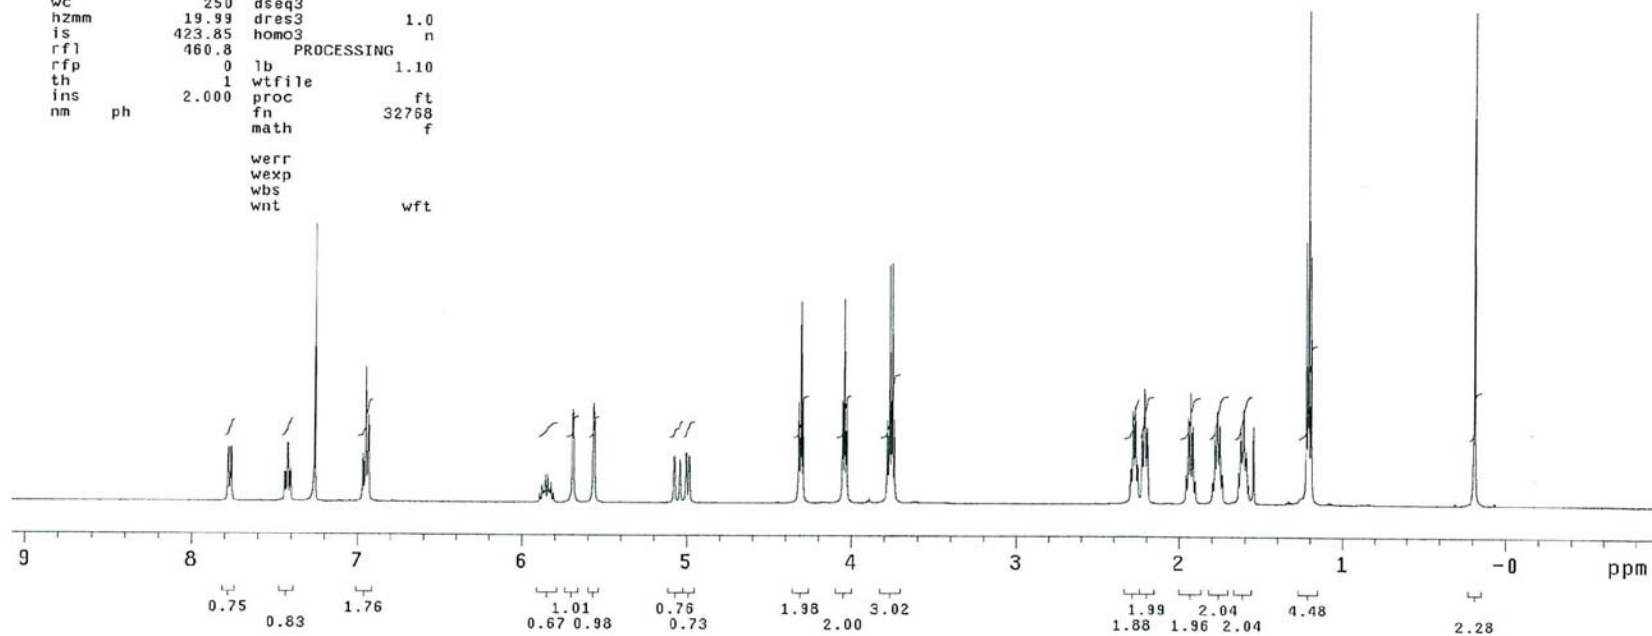

WYKELN5121\_13C

exp1 s2pu1

| SAMPLE      |             | DEC. & VT  |          |
|-------------|-------------|------------|----------|
| date        | Mar 28 2010 | dfrq       | 499.874  |
| solvent     | CDC13       | dn         | H1       |
| file        | exp         | dpwr       | 48       |
| ACQUISITION |             | dof        | 0        |
| sfrq        | 125.707     | dm         | yyy      |
| tn          | C13         | dmm        | w        |
| at          | 1.092       | dmf        | 10000    |
| np          | 65536       | dseq       |          |
| sw          | 29996.3     | dres       | 1.0      |
| fb          | not used    | homo       | n        |
| bs          | 16          | temp       | 23.0     |
| tpwr        | 55          | DEC2       |          |
| pw          | 4.2         | dfrq2      | 0        |
| d1          | 0           | dn2        |          |
| tof         | 2000.0      | dpwr2      | 1        |
| nt          | 9999        | dof2       | 0        |
| ct          | 384         | dm2        | n        |
| alock       | n           | dmm2       | c        |
| gain        | not used    | dmf2       | 10000    |
| FLAGS       |             | dseq2      |          |
| il          | n           | dres2      | 1.0      |
| in          | n           | homo2      | n        |
| dp          | y           | DEC3       |          |
| hs          | nn          | dfrq3      | 0        |
| DISPLAY     |             | dn3        |          |
| sp          | -1090.6     | dpwr3      | 1        |
| wp          | 29995.3     | dof3       | 0        |
| vs          | 38          | dm3        | n        |
| sc          | 0           | dmm3       | c        |
| wc          | 250         | dmf3       | 10000    |
| hzmm        | 119.98      | dseq3      |          |
| is          | 500.00      | dres3      | 1.0      |
| rfl         | 10769.8     | homo3      | n        |
| rff         | 9678.3      | PROCESSING |          |
| th          | 5           | lb         | 1.00     |
| ins         | 100.000     | wtfile     |          |
| nm          | cdc ph      | proc       | ft       |
|             |             | fn         | not used |
|             |             | math       | f        |
|             |             | werr       |          |
|             |             | wexp       |          |
|             |             | wbs        |          |
|             |             | wnt        |          |

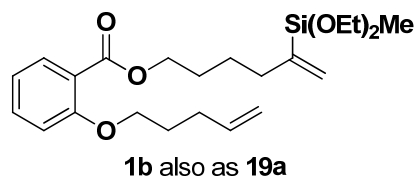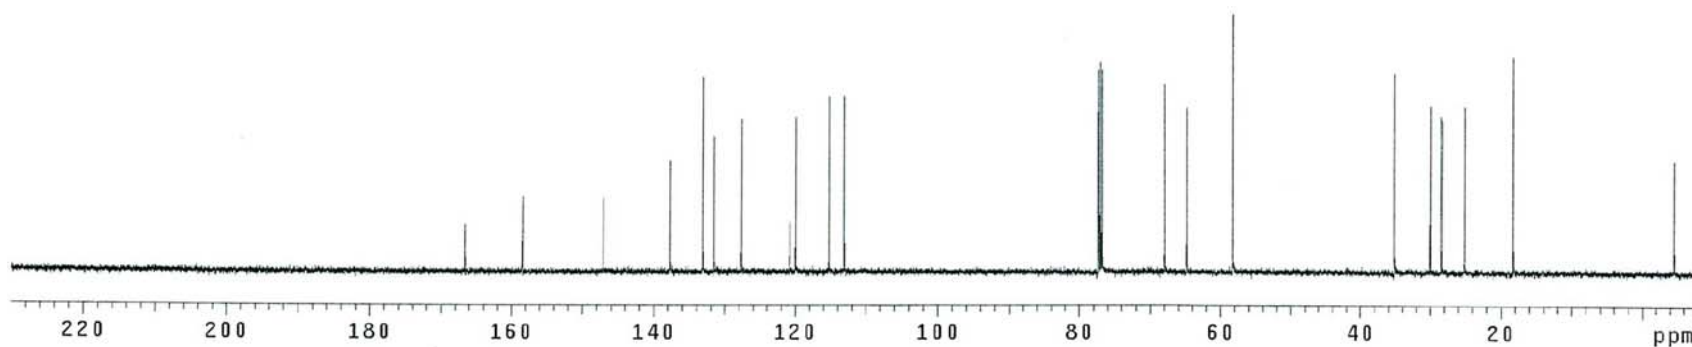

S54



VYKELN10013\_13C

exp2 s2pu1

| SAMPLE      |             | DEC. & VT  |          |
|-------------|-------------|------------|----------|
| date        | Mar 31 2010 | dfrq       | 499.874  |
| solvent     | CDC13       | dn         | H1       |
| file        | exp         | dpwr       | 48       |
| ACQUISITION |             |            |          |
| sfrq        | 125.707     | dof        | 0        |
| tn          | C13         | dm         | yyy      |
| at          | 1.092       | dmm        | w        |
| np          | 65536       | dseq       | 10000    |
| sw          | 29996.3     | dres       | 1.0      |
| fb          | not used    | homo       | n        |
| bs          | 16          | DEC2       |          |
| tpwr        | 55          | dfrq2      | 0        |
| pw          | 4.2         | dn2        |          |
| d1          | 0           | dpwr2      | 1        |
| tof         | 2000.0      | dof2       | 0        |
| nt          | 9999        | dm2        | n        |
| ct          | 560         | dmm2       | c        |
| alock       | n           | dof2       | 10000    |
| gain        | not used    | dseq2      |          |
| FLAGS       |             | dres2      | 1.0      |
| il          | n           | homo2      | n        |
| in          | n           | DEC3       |          |
| dp          | y           | dfrq3      | 0        |
| hs          | nn          | dn3        |          |
| DISPLAY     |             |            |          |
| sp          | -1090.6     | dpwr3      | 1        |
| wp          | 29995.3     | dof3       | 0        |
| vs          | 27          | dm3        | n        |
| sc          | 0           | dmm3       | c        |
| wc          | 250         | dof3       | 10000    |
| hzmm        | 119.98      | dseq3      |          |
| is          | 500.00      | dres3      | 1.0      |
| rfl         | 10769.8     | homo3      | n        |
| rff         | 9678.3      | PROCESSING |          |
| th          | 3           | lb         | 1.00     |
| ins         | 100.000     | wtfile     |          |
| nm          | cdc ph      | proc       | ft       |
|             |             | fn         | not used |
|             |             | math       | f        |
|             |             | werr       |          |
|             |             | wexp       |          |
|             |             | wbs        |          |
|             |             | wnt        |          |

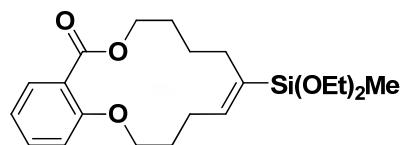

2b also as 19

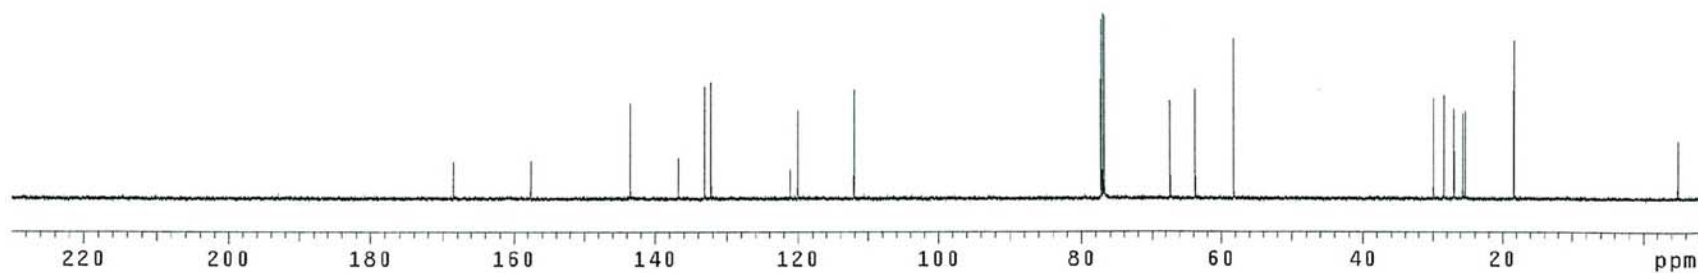

S56



WYKELN10021\_1H

expl s2pu1

```

SAMPLE
date Apr 21 2010 dfrq DEC. & VT 499.874
solvent CDC13 dn H1
file /export/home/~ dpwr 30
ds2/vnmrsys/data/i~ dof 0
500c/schreiber/WAN~ dm nnn
G/Pub1/WYKELN10021~ dmm c
_1H.fid dmf 200
ACQUISITION
sfrq 499.875 dres 1.0
tn H1 homo n
at 2.184 temp 25.0
np 32768
sw 7501.2 lb PROCESSING 1.10
fb not used wtfile
bs 4 proc ft
ss 2 fn 32768
lpwr 62 math f
pw 12.0
d1 0 werr
tof 800.0 wexp
nt 32 wbs
ct 32 wnt wft
alock n
gain not used
FLAGS
il n
in n
dp y
hs nn
DISPLAY
sp -259.8
wp 4998.6
vs 148
sc 0
wc 250
hzmm 19.99
is 177.83
rfl 4089.8
rfp 3629.1
th 7
ins 2.000
nm ph
```

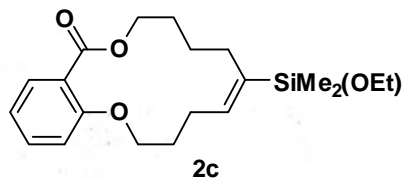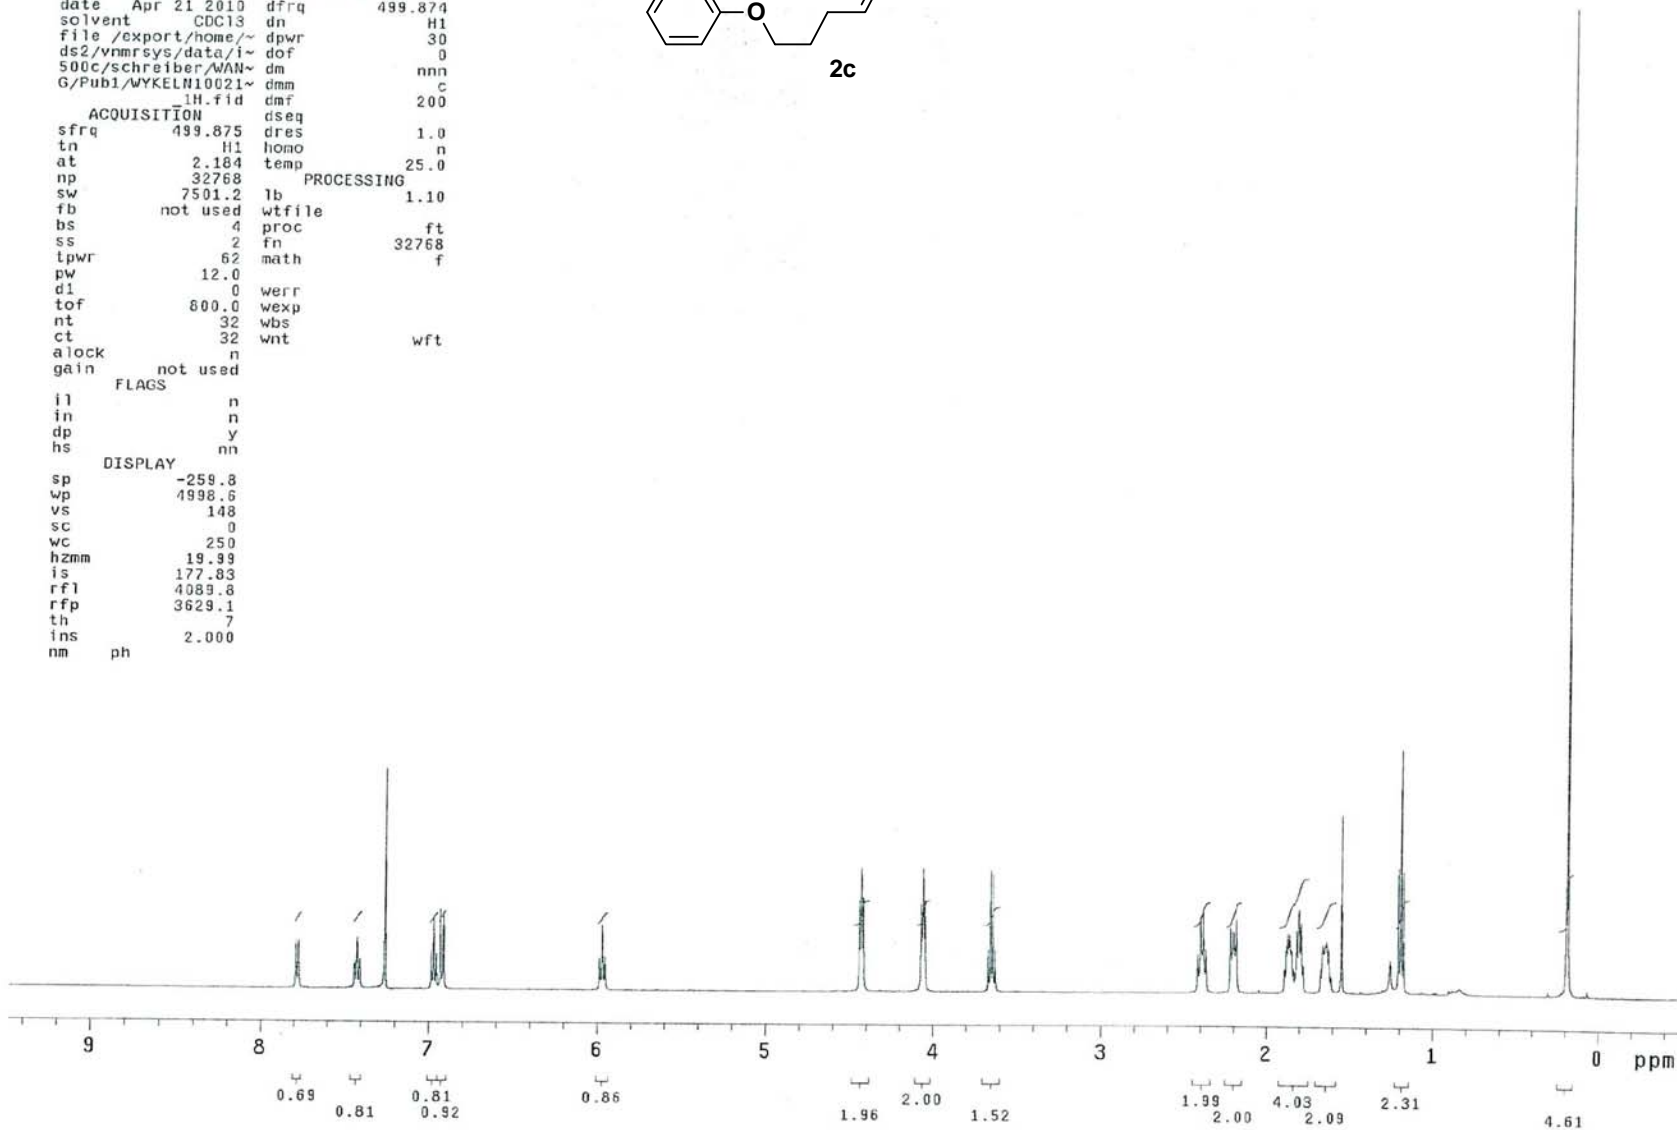

S57

WYKELN10021\_13C

exp2 s2pu1

| SAMPLE      |             | DEC. & VT  |          |
|-------------|-------------|------------|----------|
| date        | Apr 21 2010 | dfrq       | 499.874  |
| solvent     | CDC13       | dn         | H1       |
| file        | exp         | dpwr       | 48       |
| ACQUISITION |             | dof        | 0        |
| sfrq        | 125.707     | dm         | yyy      |
| tn          | C13         | dmm        | w        |
| at          | 1.092       | dmf        | 10000    |
| np          | 65536       | dseq       |          |
| sw          | 29996.3     | dres       | 1.0      |
| fb          | not used    | homo       | n        |
| bs          | 32          | temp       | 25.0     |
| tpwr        | 55          | DEC2       |          |
| pw          | 4.2         | dfrq2      | 0        |
| d1          | 0           | dn2        |          |
| tof         | 2000.0      | dpwr2      | 1        |
| nt          | 99999       | dof2       | 0        |
| ct          | 7584        | dm2        | n        |
| alock       | not used    | dmm2       | c        |
| gain        | not used    | dmf2       | 10000    |
| FLAGS       |             | dseq2      |          |
| il          | n           | dres2      | 1.0      |
| in          | n           | homo2      | n        |
| dp          | y           | DEC3       |          |
| hs          | nn          | dfrq3      | 0        |
| DISPLAY     |             | dn3        |          |
| sp          | -1085.9     | dpwr3      | 1        |
| wp          | 29995.3     | dof3       | 0        |
| vs          | 169         | dm3        | n        |
| sc          | 0           | dmm3       | c        |
| wc          | 250         | dmf3       | 10000    |
| h2mm        | 119.98      | dseq3      |          |
| is          | 500.00      | dres3      | 1.0      |
| rfl         | 10766.2     | homo3      | n        |
| rfp         | 9678.3      | PROCESSING |          |
| th          | 3           | lb         | 1.00     |
| ins         | 100.000     | wtfile     |          |
| nm          | cdc ph      | proc       | ft       |
|             |             | fn         | not used |
|             |             | math       | f        |
|             |             | werr       |          |
|             |             | wexp       |          |
|             |             | wbs        |          |
|             |             | wnt        |          |

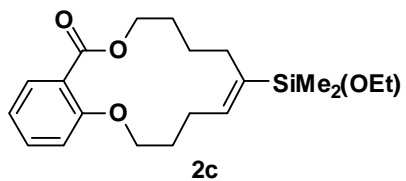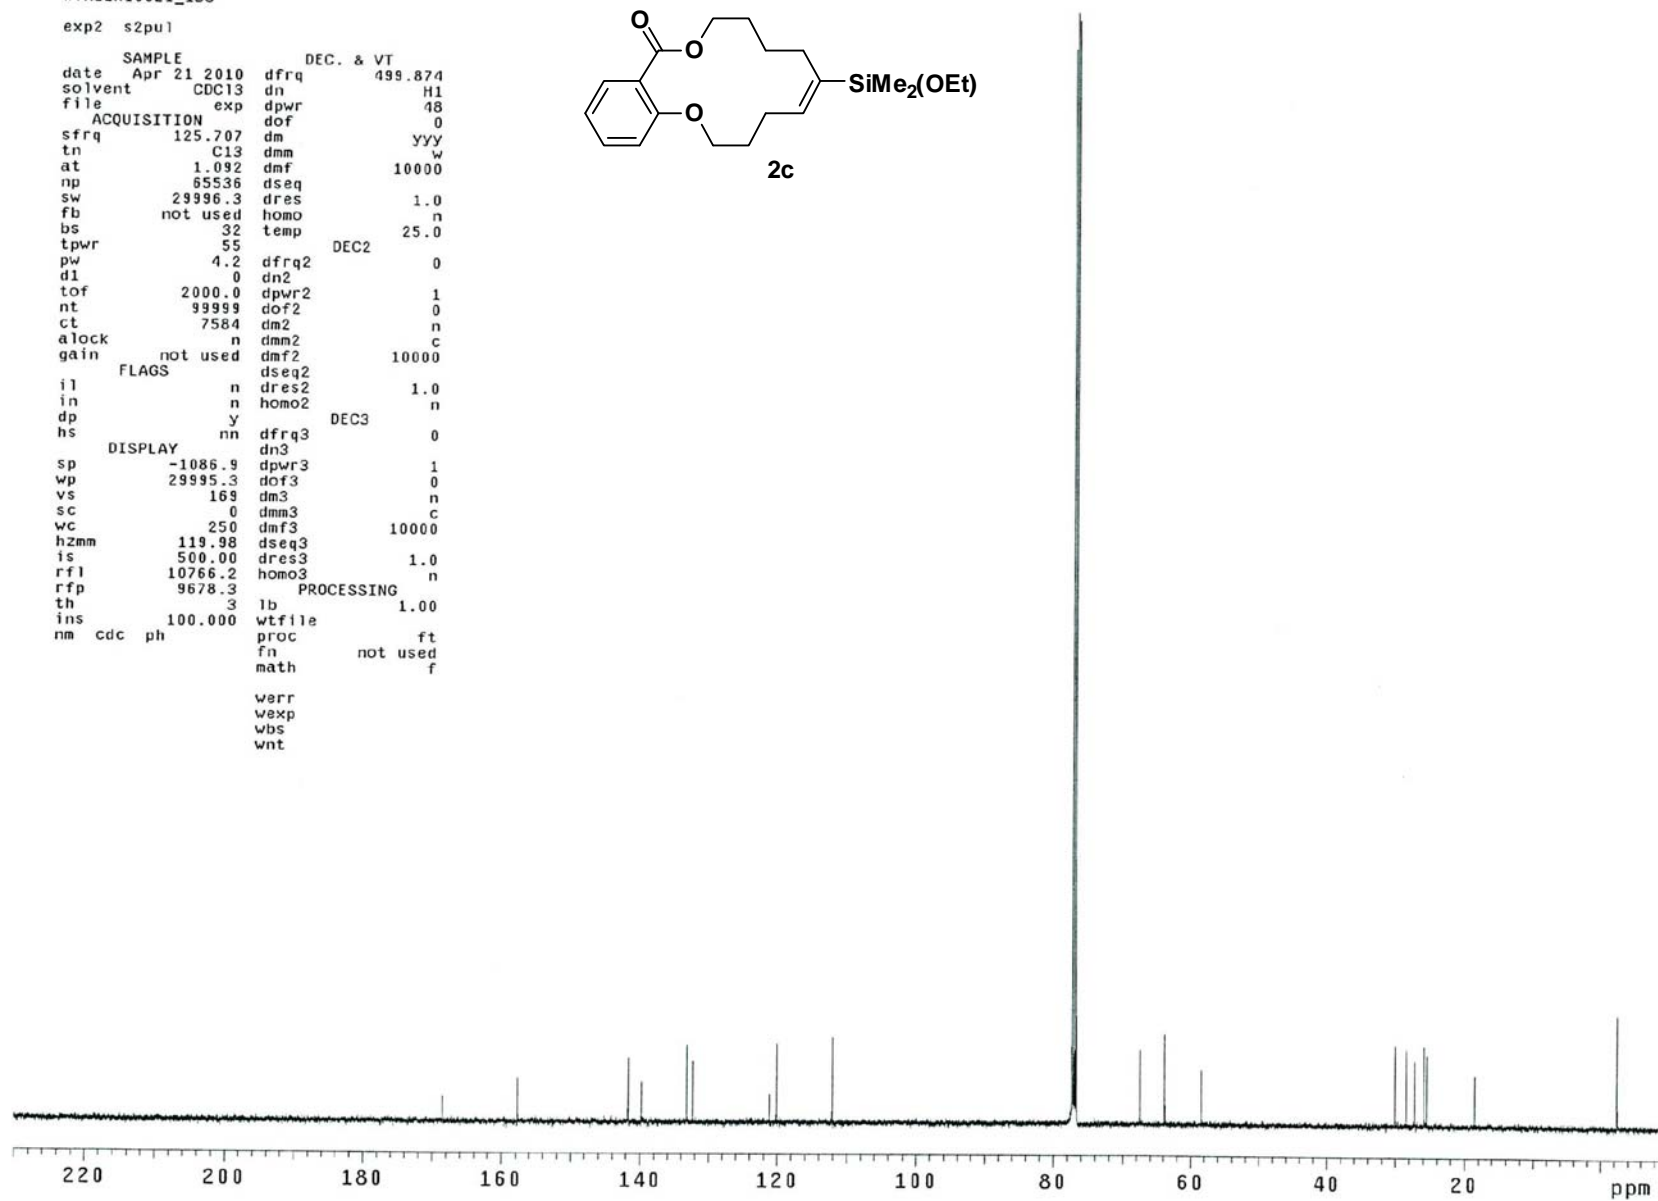

S58

WYKELN5120\_1H

expl s2pu1

SAMPLE DEC. & VT  
date Apr 6 2010 dfrq 499.874  
solvent CDC13 dn H1  
file /export/home/~ dpwr 30  
ds2/vnmrsys/data/i~ dof 0  
500c/schreiber/WAN~ dm nnn  
G/Pub1/WYKELN5120~ dmm c  
1H.fid dmf 200

ACQUISITION  
sfrq 499.875 dres 1.0  
tn H1 homo n  
at 2.184 temp 25.0  
np 32768  
sw 7501.2 lb 1.10  
fb not used wtfile  
bs 4 proc ft  
ss 2 fn 32768  
tpwr 62 math f  
pw 12.0  
d1 0 werr  
tof 800.0 wexp  
nt 32 wbs  
ct 32 wnt wft  
alock n  
gain not used

FLAGS  
i1 n  
in n  
dp y  
hs nn

DISPLAY  
sp -250.2  
wp 4998.6  
vs 151  
sc 0  
wc 250  
h2mm 19.99  
is 440.65  
rfl 4089.8  
rfp 3629.1  
th 7  
ins 2.000  
nm ph

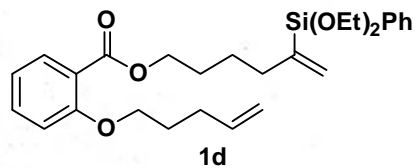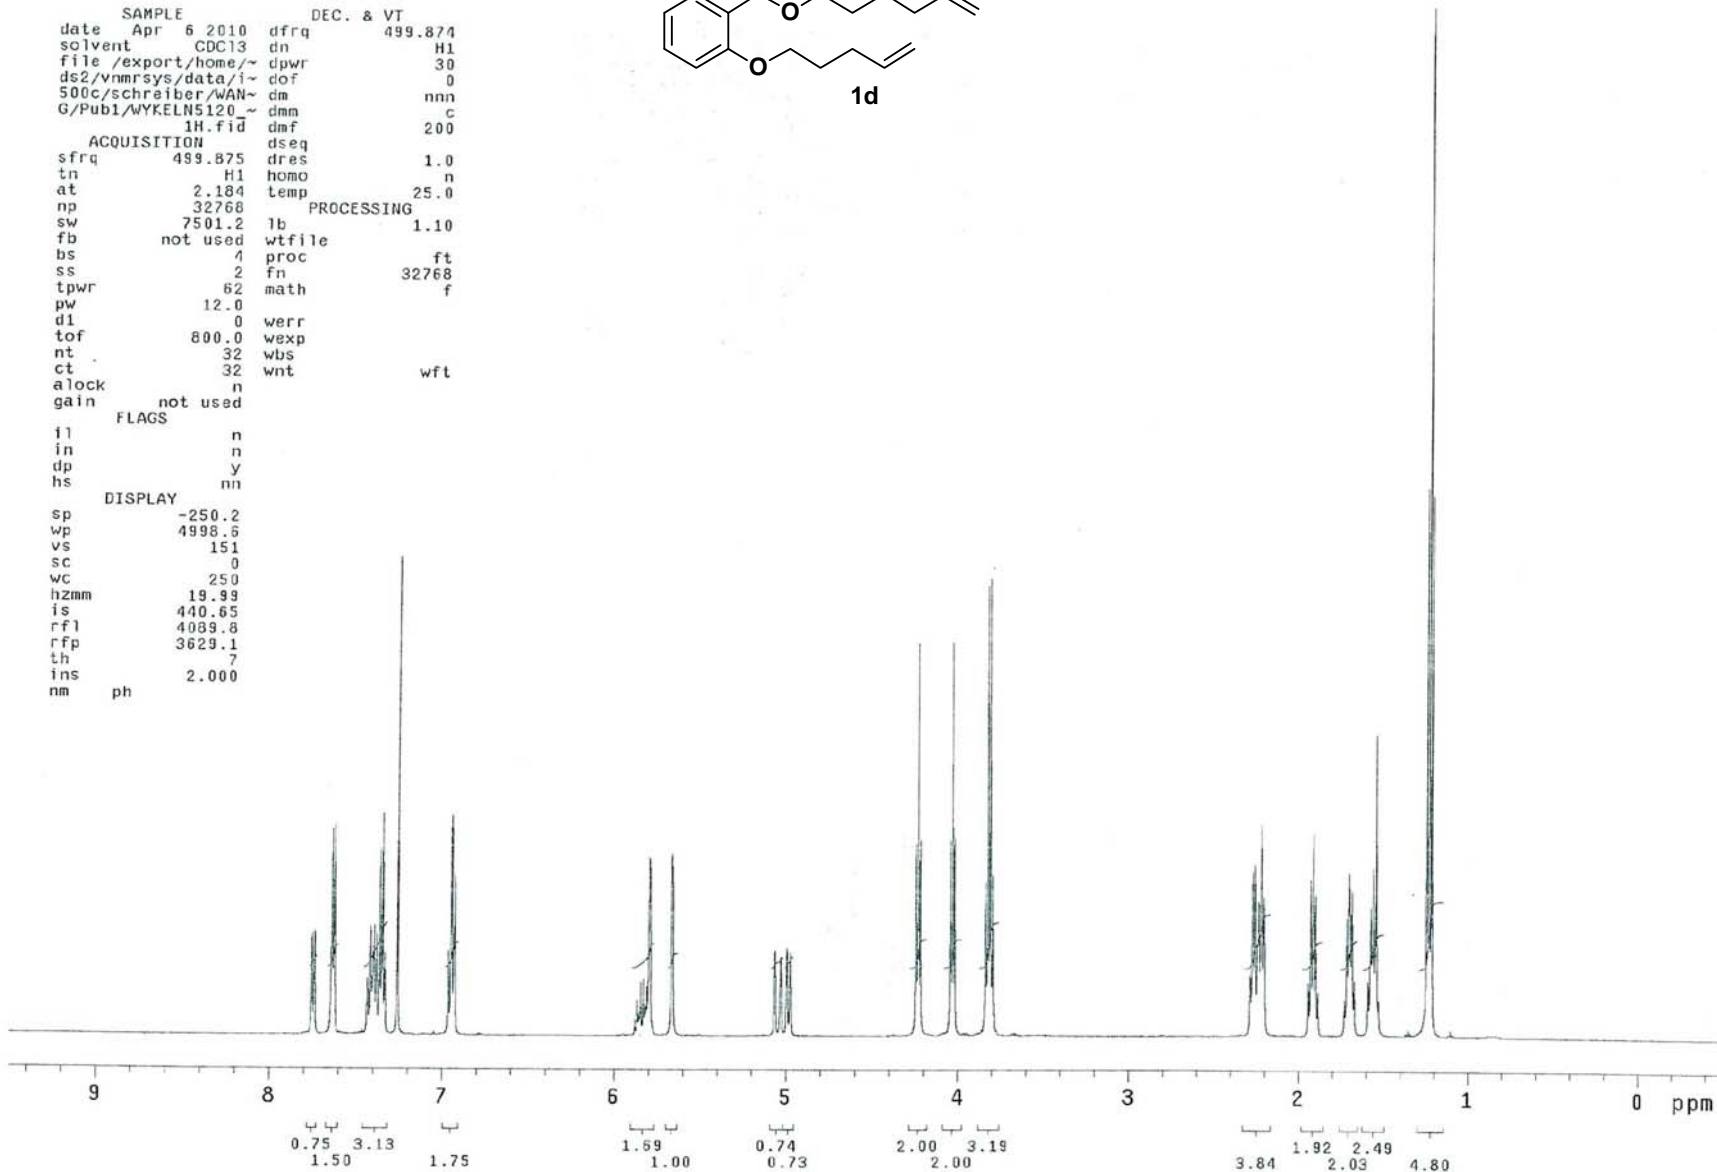

S59

WYKELN5120\_13C

exp2 s2pu1

```
SAMPLE          DEC. & VT
date Apr 6 2010 dfrq      499.874
solvent CDC13          dn      H1
file /export/home/~ dpwr     48
1500c/vnmrsys/data~ dof      0
/schreiber/WANG/Pu~ dm       yyY
bl/WYKELN5120_13C~ dmm      10000
                    fid      dmf
ACQUISITION      dseq
sfrq      125.707 dres      1.0
tn         C13     homo      n
at         1.092   temp     25.0
np         65536   dfrq2    DEC2
sw         29996.3 dfrq2    0
fb         not used dn2
bs         16      dpwr2    1
tpwr       55      dof2     0
pw         4.2     dm2      n
d1         0       dmm2     c
tof        2000.0 dmf2     10000
nt         99999  dseq2    1.0
ct         192    dres2    n
alock      not used homo2
gain       not used DEC3
                    FLAGS
i1         n       dn3
in         n       dpwr3
dp         y       dof3
hs         nn      dm3
                    DISPLAY
sp         -1089.7 dm3      10000
wp         29995.3 dseq3
vs         27      dres3    1.0
sc         0       homo3    n
wc         250    PROCESSING
hzmm       119.98 lb       1.00
is         500.00 wtfile
rfl        10768.9 proc     ft
rfp        9678.3 fn       not used
th         2      math     f
ins        100.000
nm cdc ph      werr
                    wexp
                    wbs
                    wnt
```

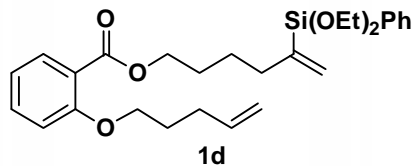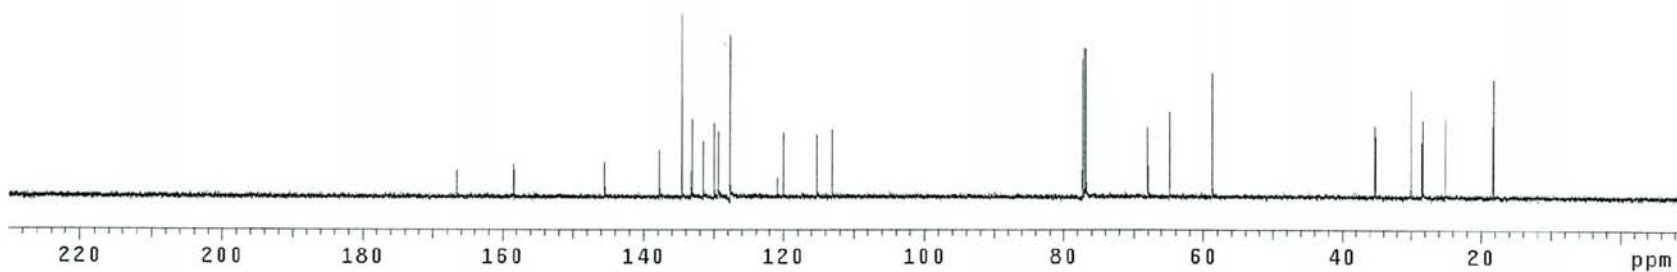

S60

WYKELN5119\_1H

exp1 s2pu1

```
SAMPLE          DEC. & VT
date Mar 28 2010 dfrq 499.874
solvent CDC13   dn      H1
file exp       dpwr    30
ACQUISITION    dof     0
sfrq 499.875   dm      nnn
tn          H1    dmm     c
at         2.184  dmf     200
np         32768 dseq
sw         7501.2 dres    1.0
fb         not used homo    n
bs         4     temp    23.0
ss         2     DEC2
tpwr        62   dfrq2   0
pw         12.0  dn2
dl         0     dpwr2   1
tof        800.0 dof2    0
nt         32   dm2     n
ct         32   dmm2    c
alock      not used dmf2   200
gain      not used dseq2
FLAGS      n      homo2   1.0
ij         n
in         n      DEC3
dp         y     dfrq3   0
hs         nn    dn3
DISPLAY    dpwr3   1
sp        -250.2 dof3    0
wp        4998.6 dm3     n
vs        119   dmm3    c
sc         0     dmf3   200
wc         250  dseq3
hzmm      19.99 dres3   1.0
ls        62.05 homo3   n
rf1       4089.8 PROCESSING
rfp       3629.1 lb      1.10
th        0     wtfile
ins       2.000 proc    ft
nm        ph    fn     32768
                    math   f
                    werr
                    wexp
                    wbs
                    wnt    wft
```

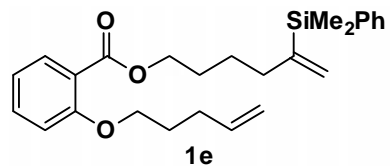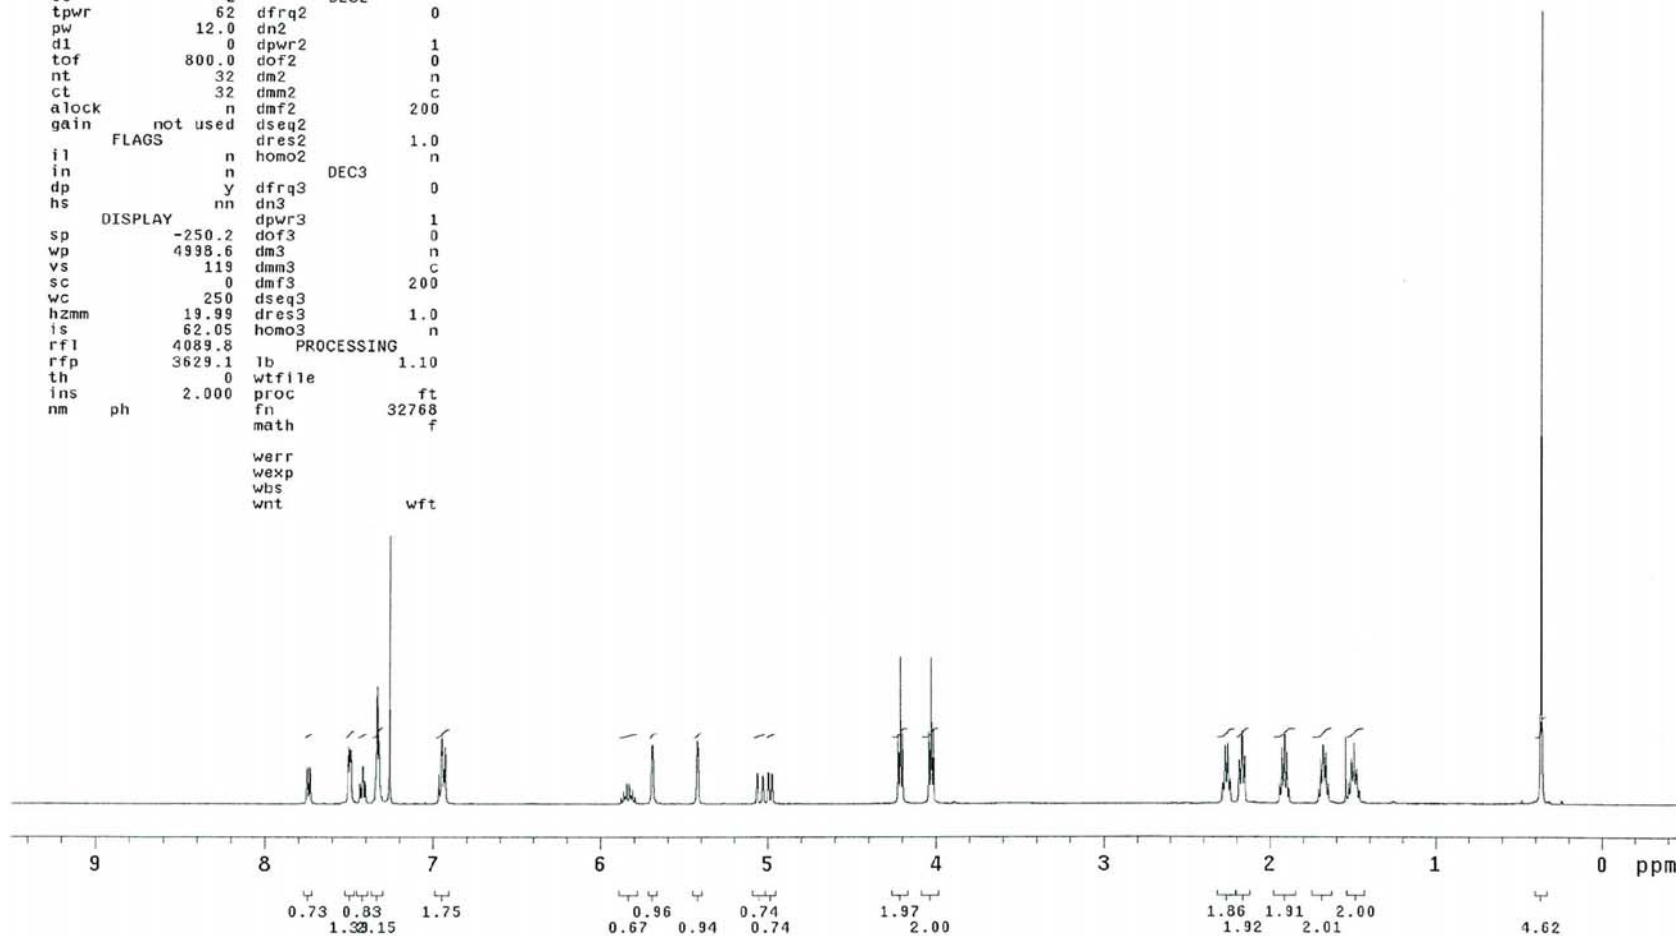

WYKELN5119\_13C

exp1 s2pu1

| SAMPLE      |             | DEC. & VT |          |
|-------------|-------------|-----------|----------|
| date        | Mar 28 2010 | dfrq      | 499.874  |
| solvent     | CDC13       | dn        | H1       |
| file        | exp         | dpwr      | 48       |
| ACQUISITION |             |           |          |
| sfrq        | 125.707     | dm        | yyy      |
| tn          | C13         | dmm       | w        |
| at          | 1.092       | dmf       | 10000    |
| np          | 65536       | dseq      |          |
| sw          | 29996.3     | dres      | 1.0      |
| fb          | not used    | homo      | n        |
| bs          | 32          | temp      | 23.0     |
| tpwr        | 55          | DEC2      |          |
| pw          | 4.2         | dfrq2     | 0        |
| d1          | 0           | dn2       |          |
| tof         | 2000.0      | dpwr2     | 1        |
| nt          | 9999        | dof2      | 0        |
| ct          | 288         | dm2       | n        |
| alock       | not used    | dmm2      | c        |
| gain        | not used    | dmf2      | 10000    |
| FLAGS       |             |           |          |
| il          | n           | dseq2     |          |
| in          | n           | dres2     | 1.0      |
| dp          | y           | homo2     | n        |
| hs          | nn          | DEC3      |          |
| DISPLAY     |             |           |          |
| sp          | -1094.2     | dfrq3     | 0        |
| wp          | 29995.3     | dn3       |          |
| vs          | 54          | dpwr3     | 1        |
| sc          | 0           | dof3      | 0        |
| wc          | 250         | dm3       | n        |
| h2mm        | 119.98      | dmm3      | c        |
| is          | 500.00      | dmf3      | 10000    |
| rf1         | 10773.5     | dseq3     |          |
| rfp         | 9678.3      | dres3     | 1.0      |
| th          | 7           | homo3     | n        |
| PROCESSING  |             |           |          |
| ins         | 100.000     | lb        | 1.00     |
| nm          | cdc ph      | wf1file   |          |
|             |             | proc      | ft       |
|             |             | fn        | not used |
|             |             | math      | f        |
|             |             | werr      |          |
|             |             | wexp      |          |
|             |             | wbs       |          |
|             |             | wnt       |          |

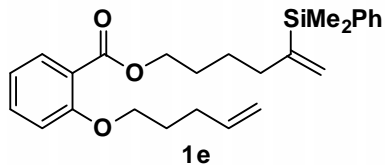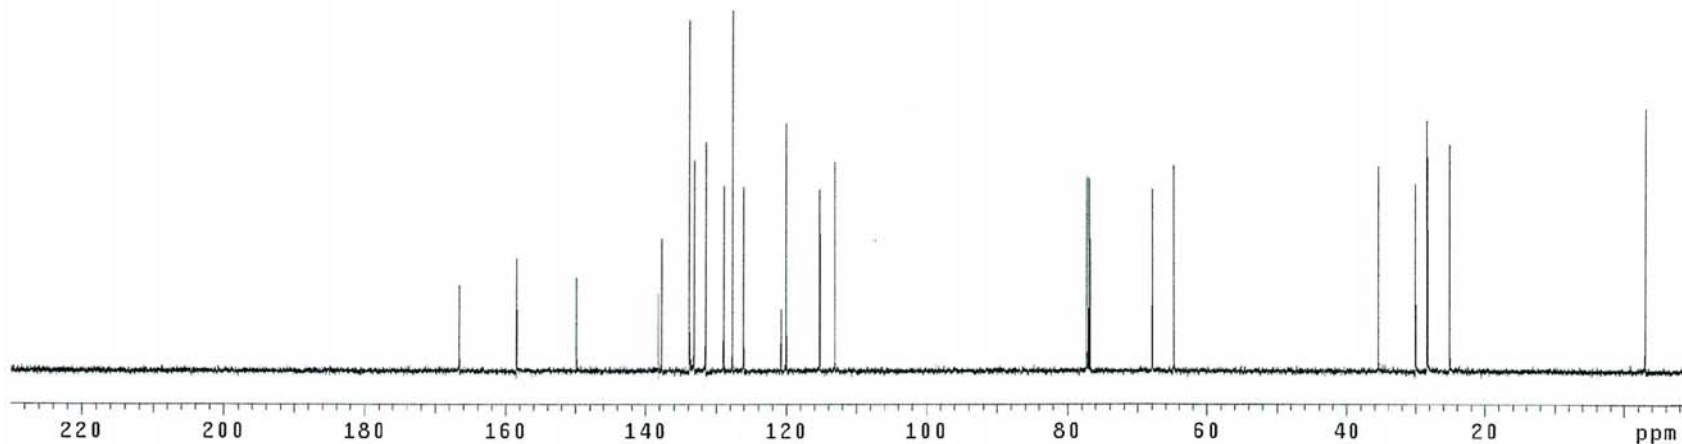

S62

WYKELN10014\_1H

expl s2pul

```
SAMPLE          DEC. & VT
date Apr 5 2010 dfrq      499.874
solvent CDC13      dn      H1
file /export/home/~ dpwr    30
ds2/vnmrsys/data/i~ dof    0
500c/schreiber/WAN~ dm     nnn
G/Pub1/WYKELN10014~ dmm    c
_1H.fid         dmf     200
ACQUISITION
sfrq      499.875 dseq    1.0
tn        H1      homo    n
at        2.184   temp    25.0
np        32768
sw        7501.2  lb      1.10
fb        not used wtfile
bs        4      proc    ft
ss        2      fn      32768
tpwr      62     math    f
pw        12.0
d1        0      werr
tof       800.0 wexp
nt        32     wbs
ct        32     wnt      wft
alock     n
gain      not used
FLAGS
il         n
in         n
dp         y
hs         nn
DISPLAY
sp        -250.2
wp        4998.6
vs        140
sc        0
wc        250
hzmm      19.99
is        503.75
rfl       4089.8
rfp       3629.1
th        2
ins       2.000
nm        ph
```

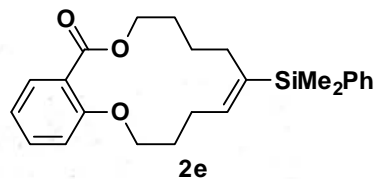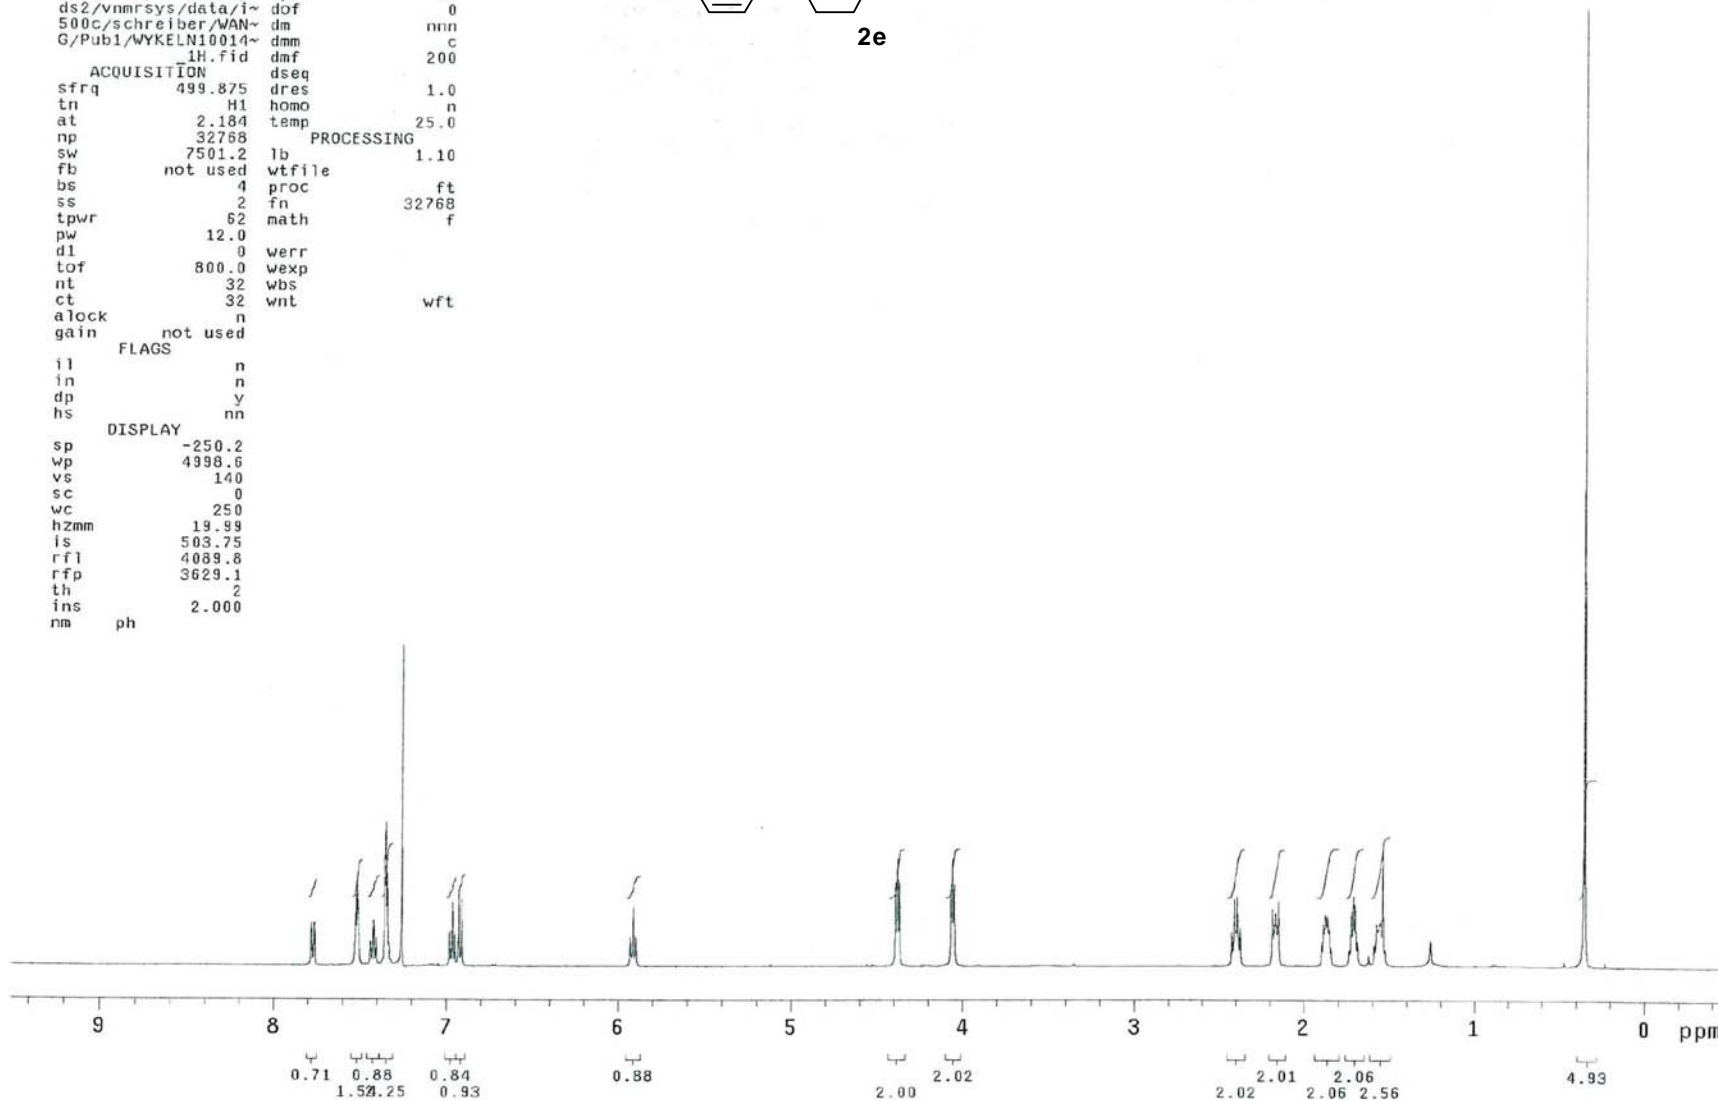

S63

WYKELN10014\_13C

exp2 s2pu1

|             |            |            |          |
|-------------|------------|------------|----------|
| date        | Apr 2 2010 | dfrq       | 499.874  |
| solvent     | CDC13      | dn         | H1       |
| file        | exp        | dpwr       | 48       |
| ACQUISITION |            |            |          |
| sfrq        | 125.707    | dm         | yyy      |
| tn          | C13        | dmm        | w        |
| at          | 1.092      | dmf        | 10000    |
| np          | 65536      | dseq       |          |
| sw          | 29996.3    | dres       | 1.0      |
| fb          | not used   | homo       | n        |
| bs          | 16         | temp       | 25.0     |
| tpwr        | 55         | DEC2       |          |
| pw          | 4.2        | dfrq2      | 0        |
| d1          | 0          | dn2        |          |
| tof         | 2000.0     | dpwr2      | 1        |
| nt          | 99999      | dof2       | 0        |
| ct          | 2128       | dm2        | n        |
| alock       | n          | dmm2       | c        |
| gain        | not used   | dmf2       | 10000    |
| FLAGS       |            |            |          |
| il          | n          | dres2      | 1.0      |
| in          | n          | homo2      | n        |
| dp          | y          | DEC3       |          |
| hs          | nn         | dfrq3      | 0        |
| DISPLAY     |            |            |          |
| sp          | -1088.7    | dn3        |          |
| wp          | 29995.3    | dpwr3      | 1        |
| vs          | 25         | dof3       | 0        |
| sc          | 0          | dm3        | n        |
| wc          | 250        | dmm3       | c        |
| hzmm        | 119.98     | dmf3       | 10000    |
| is          | 500.00     | dseq3      |          |
| rfl         | 10768.0    | dres3      | 1.0      |
| rfp         | 9678.3     | homo3      | n        |
| th          | 2          | PROCESSING |          |
| ins         | 100.000    | lb         | 1.00     |
| nm          | cdc ph     | wfile      |          |
|             |            | proc       | ft       |
|             |            | fn         | not used |
|             |            | math       | f        |
|             |            | werr       |          |
|             |            | wexp       |          |
|             |            | wbs        |          |
|             |            | wnt        |          |

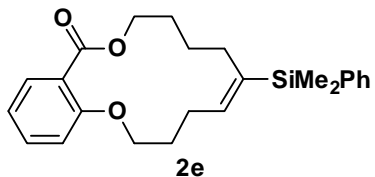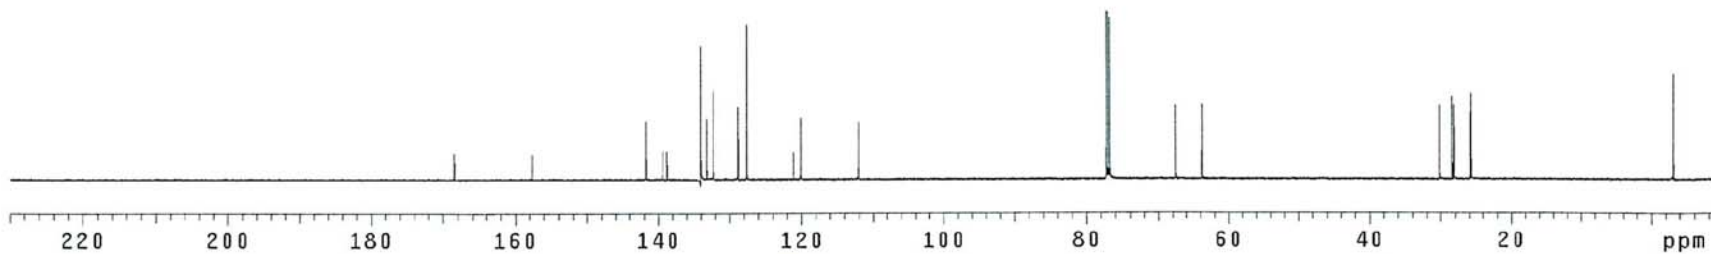

S64



WYKELN5161\_1H

exp1 s2pu1

```
SAMPLE      DEC. & VT
date Mar 29 2010 dfrq 499.874
solvent CDC13 dn H1
file exp dpwr 30
ACQUISITION dof 0
sfrq 499.875 dm nnn
tn H1 dmm c
at 2.184 dmf 200
np 32768 dseq
sw 7501.2 dres 1.0
fb not used homo n
bs 4 temp 23.0
ss 2 DEC2
tpwr 62 dfrq2 0
pw 12.0 dn2
d1 0 dpwr2 1
tof 800.0 dof2 0
nt 32 dm2 n
ct 32 dmm2 c
alock n dmf2 200
gain not used dseq2
FLAGS dres2 1.0
il n homo2 n
in n DEC3
dp y dfrq3 0
hs nn dn3
DISPLAY dpwr3 1
sp -250.2 dof3 0
wp 4998.6 dm3 n
vs 106 dmm3 c
sc 0 dmf3 200
wc 250 dseq3
hzmm 19.99 dres3 1.0
is 655.43 homo3 n
rf1 4089.8 PROCESSING
rfp 3629.1 lb 1.10
th 1 wtfile
ins 2.000 proc ft
nm ph fn 32768
math f
werr
wexp
wbs
wnt wft
```

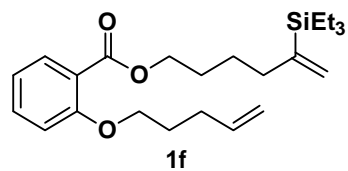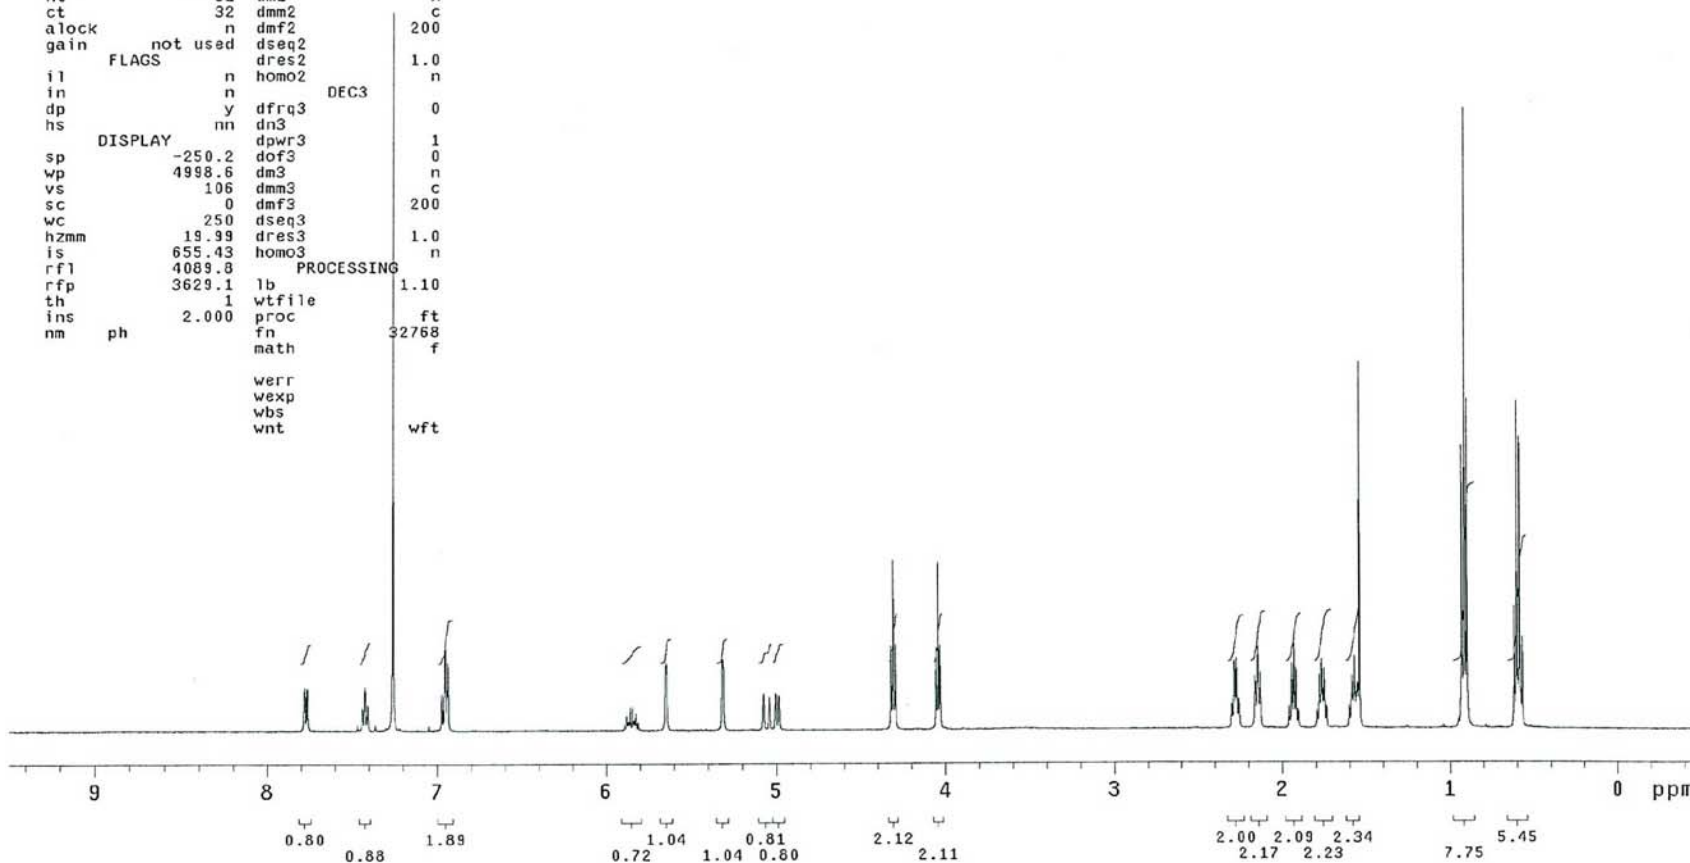

S65

WYKELN5161\_13C

exp1 s2pu1

| SAMPLE      |             | DEC. & VT |          |
|-------------|-------------|-----------|----------|
| date        | Mar 29 2010 | dfrq      | 499.874  |
| solvent     | CDC13       | dn        | H1       |
| file        | exp         | dpwr      | 48       |
| ACQUISITION |             |           |          |
| sfrq        | 125.707     | dm        | yyy      |
| tn          | C13         | dmm       | w        |
| at          | 1.092       | dmf       | 10000    |
| np          | 65536       | dseq      |          |
| sw          | 29996.3     | dres      | 1.0      |
| fb          | not used    | homo      | n        |
| bs          | 16          | temp      | 23.0     |
| tpwr        | 55          | DEC2      |          |
| pw          | 4.2         | dfrq2     | 0        |
| d1          | 0           | dn2       |          |
| tof         | 2000.0      | dpwr2     | 1        |
| nt          | 9999        | dof2      | 0        |
| ct          | 336         | dm2       | n        |
| alock       | not used    | dmm2      | c        |
| gain        | not used    | dmf2      | 10000    |
| FLAGS       |             |           |          |
| il          | n           | dseq2     |          |
| in          | n           | dres2     | 1.0      |
| dp          | y           | homo2     | n        |
| hs          | nn          | DEC3      |          |
| DISPLAY     |             |           |          |
| sp          | -1089.7     | dfrq3     | 0        |
| wp          | 29995.3     | dn3       |          |
| vs          | 52          | dpwr3     | 1        |
| sc          | 0           | dof3      | 0        |
| wc          | 250         | dm3       | n        |
| hzmm        | 119.98      | dmm3      | c        |
| is          | 500.00      | dmf3      | 10000    |
| rfl         | 10768.9     | dseq3     |          |
| rfp         | 9678.3      | dres3     | 1.0      |
| th          | 3           | homo3     | n        |
| PROCESSING  |             |           |          |
| ins         | 100.000     | lb        | 1.00     |
| nm          | cdc ph      | wtfile    |          |
|             |             | proc      | ft       |
|             |             | fn        | not used |
|             |             | math      | f        |
|             |             | werr      |          |
|             |             | wexp      |          |
|             |             | wbs       |          |
|             |             | wnt       |          |

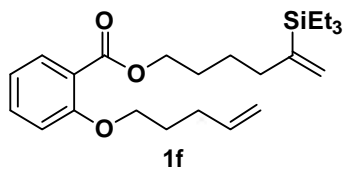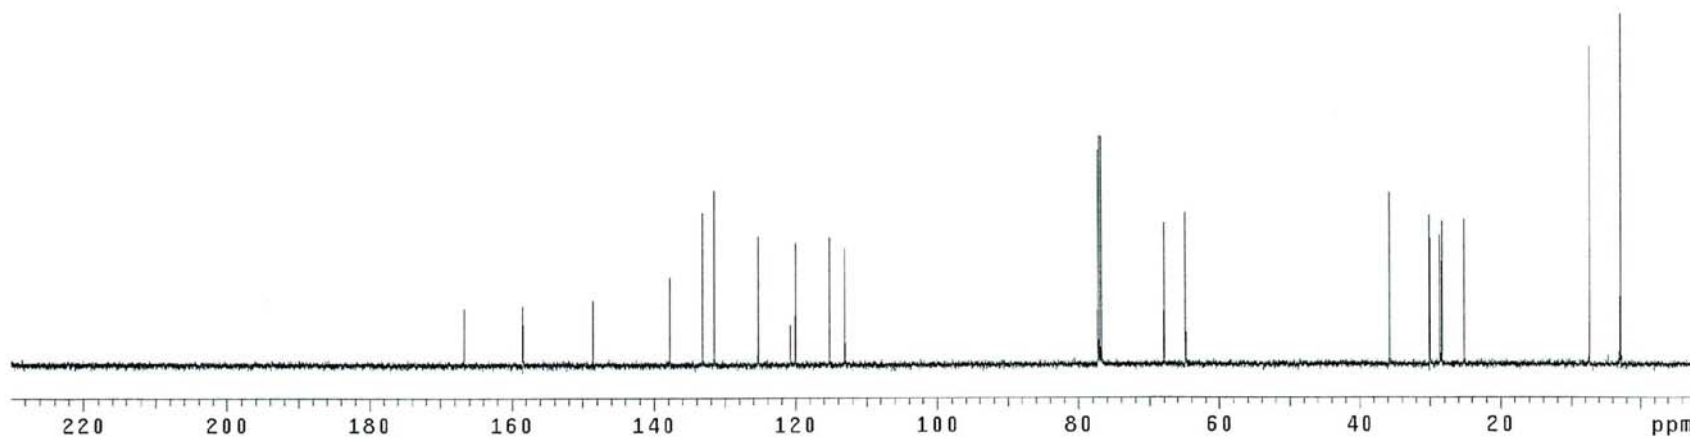

S66

WYKELN5021\_1H

exp1 s2pu1

SAMPLE DEC. & VT  
date Apr 1 2010 dfrq 499.874  
solvent CDCl3 dn H1  
file /export/home/~ dpwr 30  
ds2/vnmrsys/data/i~ dof 0  
500c/schreiber/WAN~ dm nnn  
G/Pub1/WYKELN5021~ dmm c  
1H.fid dmf 200

ACQUISITION  
sfrq 499.875 dres 1.0  
tn H1 homo n  
at 2.184 temp 25.0  
np 32768  
sw 7501.2 lb 1.10  
fb not used wtfile  
bs 4 proc ft  
ss 2 fn 32768  
tpwr 62 math f  
pw 12.0  
d1 0 werr  
tof 800.0 wexp  
nt 32 wbs  
ct 0 wnt  
alock n  
gain not used

FLAGS  
il n  
in n  
dp y  
hs nn

DISPLAY  
sp -250.2  
wp 4998.6  
vs 118  
sc 0  
wc 250  
hzmm 19.99  
is 909.88  
rfl 4089.8  
rfp 3629.1  
th 2  
ins 2.000  
nm ph

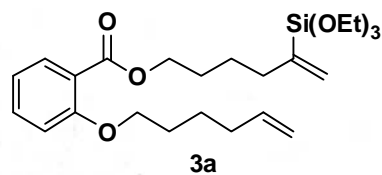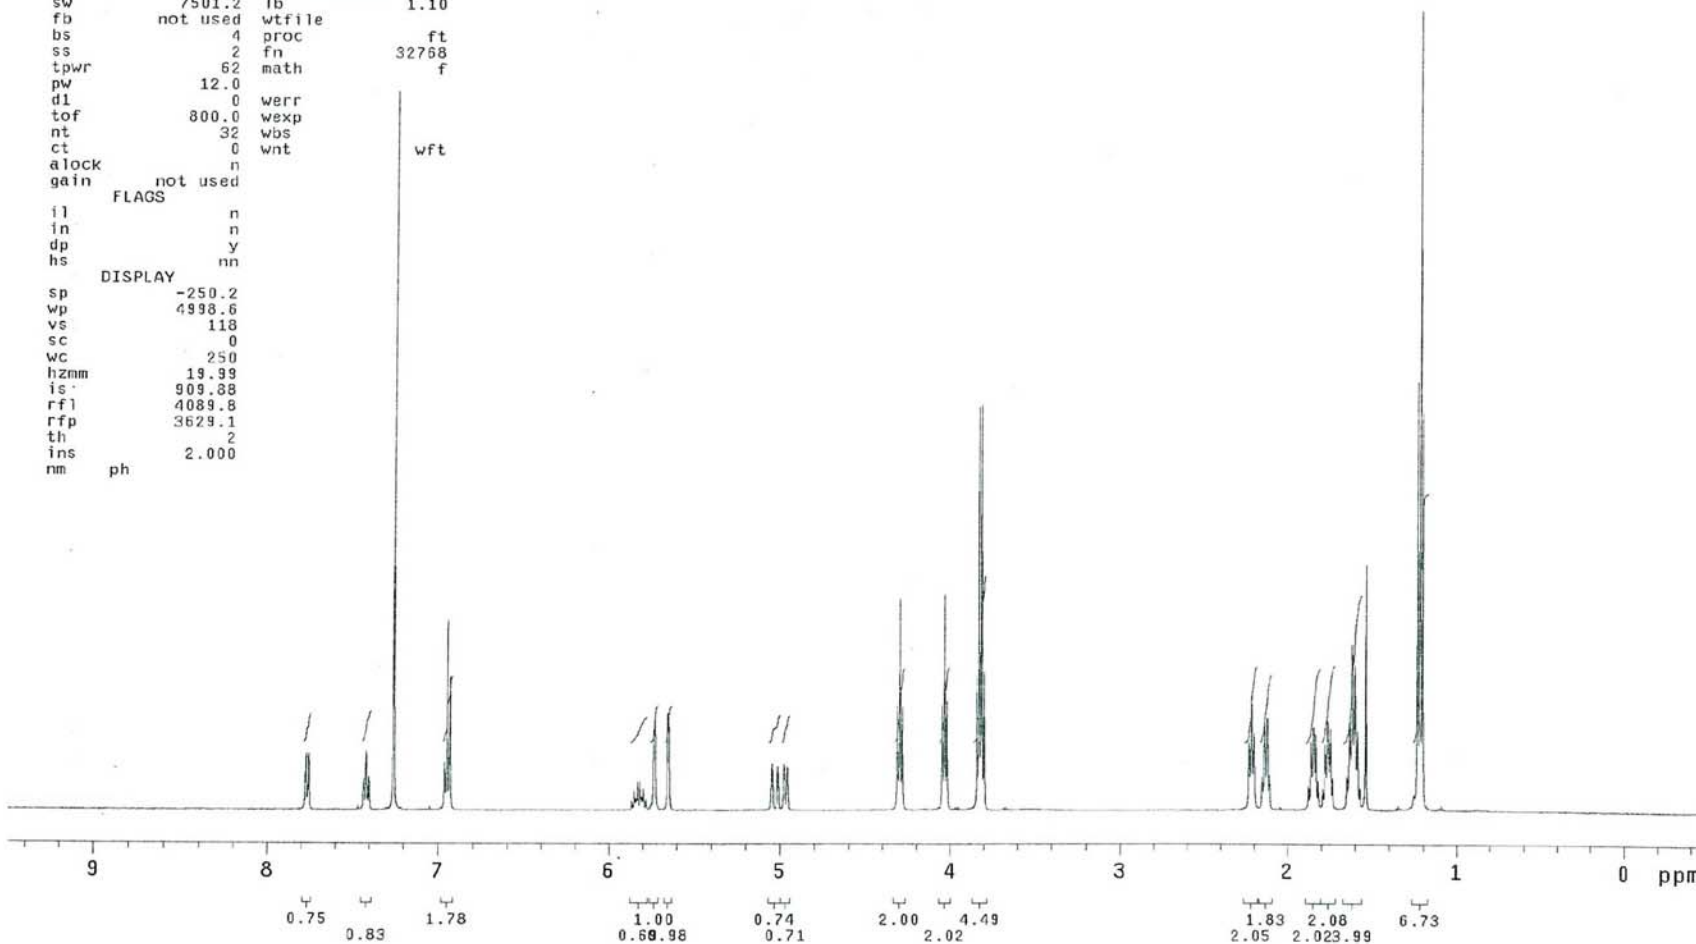

S67

WYKELN5021\_13C

exp2 s2pu1

| SAMPLE      |            | DEC. & VT  |          |
|-------------|------------|------------|----------|
| date        | Apr 1 2010 | dfrq       | 499.874  |
| solvent     | CDC13      | dn         | H1       |
| file        | exp        | dpwr       | 48       |
| ACQUISITION |            | dof        | 0        |
| sfrq        | 125.707    | dm         | YYY      |
| tn          | C13        | dmm        | w        |
| at          | 1.092      | dmf        | 10000    |
| np          | 65536      | dseq       |          |
| sw          | 29996.3    | dres       | 1.0      |
| fb          | not used   | homo       | n        |
| bs          | 16         | temp       | 25.0     |
| tpwr        | 55         | DEC2       |          |
| pw          | 4.2        | dfrq2      | 0        |
| d1          | 0          | dn2        |          |
| tof         | 2000.0     | dpwr2      | 1        |
| nt          | 9999       | dof2       | 0        |
| ct          | 0          | dm2        | n        |
| alock       | n          | dmm2       | c        |
| gain        | not used   | dmf2       | 10000    |
| FLAGS       |            | dseq2      |          |
| il          | n          | dres2      | 1.0      |
| in          | n          | homo2      | n        |
| dp          | y          | DEC3       |          |
| hs          | nn         | dfrq3      | 0        |
| DISPLAY     |            | dn3        |          |
| sp          | -1089.7    | dpwr3      | 1        |
| wp          | 29995.3    | dof3       | 0        |
| vs          | 27         | dm3        | n        |
| sc          | 0          | dmm3       | c        |
| wc          | 250        | dmf3       | 10000    |
| hzmm        | 119.98     | dseq3      |          |
| is          | 500.00     | dres3      | 1.0      |
| rfl         | 10768.9    | homo3      | n        |
| rfp         | 9678.3     | PROCESSING |          |
| th          | 2          | lb         | 1.00     |
| ins         | 100.000    | wtfile     |          |
| nm          | cdc ph     | proc       | ft       |
|             |            | fn         | not used |
|             |            | math       | f        |
|             |            | werr       |          |
|             |            | wexp       |          |
|             |            | wbs        |          |
|             |            | wnt        |          |

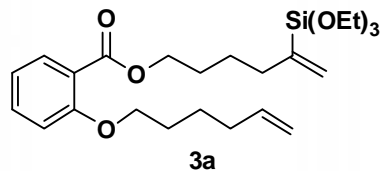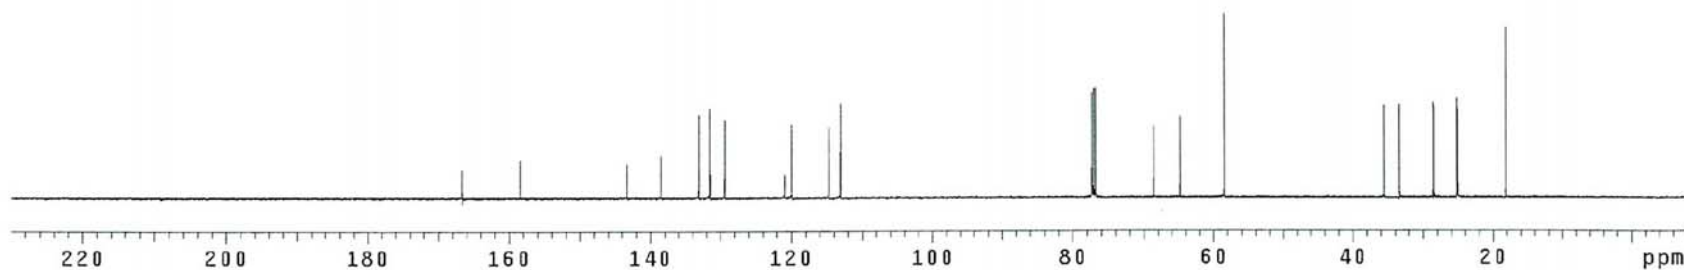

S68



WYKELN10001\_13C

exp4 s2pu1

|             |            |        |           |          |
|-------------|------------|--------|-----------|----------|
| date        | Apr 5 2010 | dfrq   | DEC. & VT | 499.874  |
| solvent     | CDC13      | dn     |           | H1       |
| file        | exp        | dpwr   |           | 48       |
| ACQUISITION |            |        |           |          |
| sfrq        | 125.707    | dm     |           | YYY      |
| tn          | C13        | dmm    |           | W        |
| at          | 1.092      | dmf    |           | 10000    |
| np          | 65536      | dseq   |           |          |
| sw          | 29996.3    | dres   |           | 1.0      |
| fb          | not used   | homo   |           | n        |
| bs          | 16         | temp   |           | 25.0     |
| tpwr        | 55         | DEC2   |           |          |
| pw          | 4.2        | dfrq2  |           | 0        |
| d1          | 0          | dn2    |           |          |
| tof         | 2000.0     | dpwr2  |           | 1        |
| nt          | 99999      | dof2   |           | 0        |
| ct          | 2112       | dm2    |           | n        |
| alock       | not used   | dmm2   |           | c        |
| gain        | not used   | dmf2   |           | 10000    |
| FLAGS       |            |        |           |          |
| fl          | n          | dseq2  |           |          |
| in          | n          | dres2  |           | 1.0      |
| dp          | y          | homo2  |           | n        |
| hs          | nn         | DEC3   |           |          |
| DISPLAY     |            |        |           |          |
| sp          | -1088.7    | dfrq3  |           | 0        |
| wp          | 29995.3    | dn3    |           |          |
| vs          | 30         | dpwr3  |           | 1        |
| sc          | 0          | dof3   |           | 0        |
| wc          | 250        | dm3    |           | n        |
| h2mm        | 119.98     | dmm3   |           | c        |
| is          | 500.00     | dmf3   |           | 10000    |
| rfl         | 10768.0    | dseq3  |           |          |
| rfp         | 9678.3     | dres3  |           | 1.0      |
| th          | 3          | homo3  |           | n        |
| PROCESSING  |            |        |           |          |
| ins         | 100.000    | lb     |           | 1.00     |
| nm          | cdc ph     | wtfile |           |          |
|             |            | proc   |           | ft       |
|             |            | fn     |           | not used |
|             |            | math   |           | f        |
|             |            | werr   |           |          |
|             |            | wexp   |           |          |
|             |            | wbs    |           |          |
|             |            | wnt    |           |          |

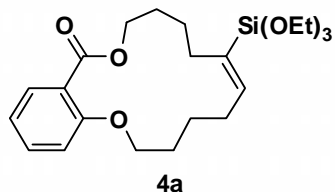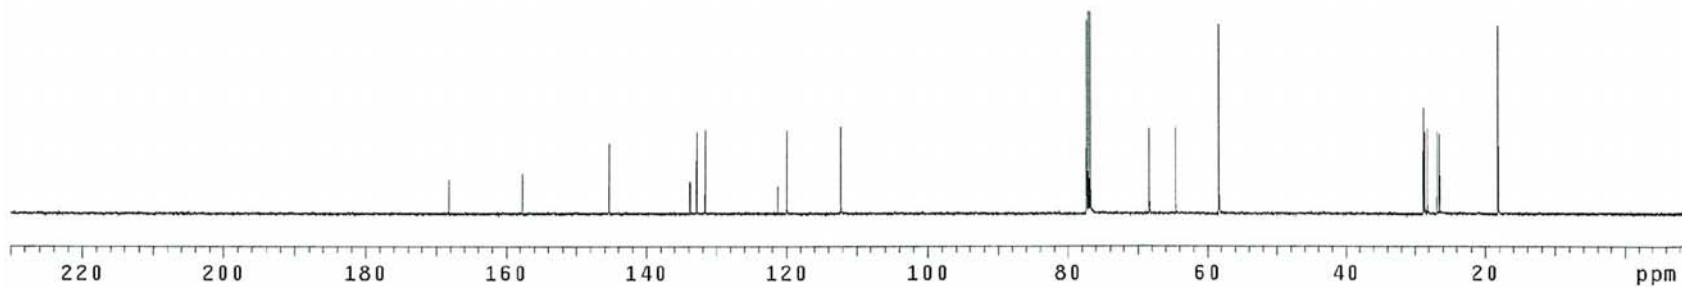

S70

WYKELN5137\_1H

exp1 s2pu1

|             |            |            |         |
|-------------|------------|------------|---------|
| date        | Apr 1 2010 | dfrq       | 499.874 |
| solvent     | CDC13      | dn         | H1      |
| file        | exp        | dpwr       | 30      |
| ACQUISITION |            |            |         |
| sfrq        | 499.875    | dm         | nnn     |
| tn          | H1         | dmm        | c       |
| at          | 2.184      | dmf        | 200     |
| np          | 32768      | dseq       |         |
| sw          | 7501.2     | dres       | 1.0     |
| fb          | not used   | homo       | n       |
| bs          | 4          | temp       | 25.0    |
| ss          | 2          | DEC2       |         |
| tpwr        | 62         | dfrq2      | 0       |
| pw          | 12.0       | dn2        |         |
| d1          | 0          | dpwr2      | 1       |
| tof         | 800.0      | dof2       | 0       |
| nt          | 32         | dm2        | n       |
| ct          | 0          | dmm2       | c       |
| alock       | 0          | dmf2       | 200     |
| gain        | not used   | dseq2      |         |
| FLAGS       |            |            |         |
| il          | n          | dres2      | 1.0     |
| in          | n          | homo2      | n       |
| dp          | y          | DEC3       |         |
| hs          | nn         | dfrq3      | 0       |
| DISPLAY     |            |            |         |
| sp          | -250.2     | dn3        |         |
| wp          | 4998.6     | dpwr3      | 1       |
| vs          | 105        | dof3       | 0       |
| sc          | 0          | dm3        | n       |
| wc          | 250        | dmm3       | c       |
| hzmm        | 19.99      | dmf3       | 200     |
| is          | 222.42     | dseq3      |         |
| rfl         | 4089.8     | dres3      | 1.0     |
| rfp         | 3629.1     | homo3      | n       |
| th          | 1          | PROCESSING |         |
| ins         | 2.000      | lb         | 1.10    |
| nm          | ph         | wfile      | ft      |
|             |            | proc       | fn      |
|             |            | fn         | 32768   |
|             |            | math       | f       |
|             |            | werr       |         |
|             |            | wexp       |         |
|             |            | wbs        |         |
|             |            | wnt        |         |

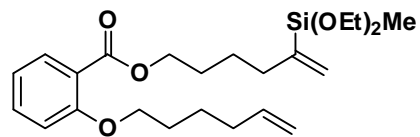

3b also as 20a

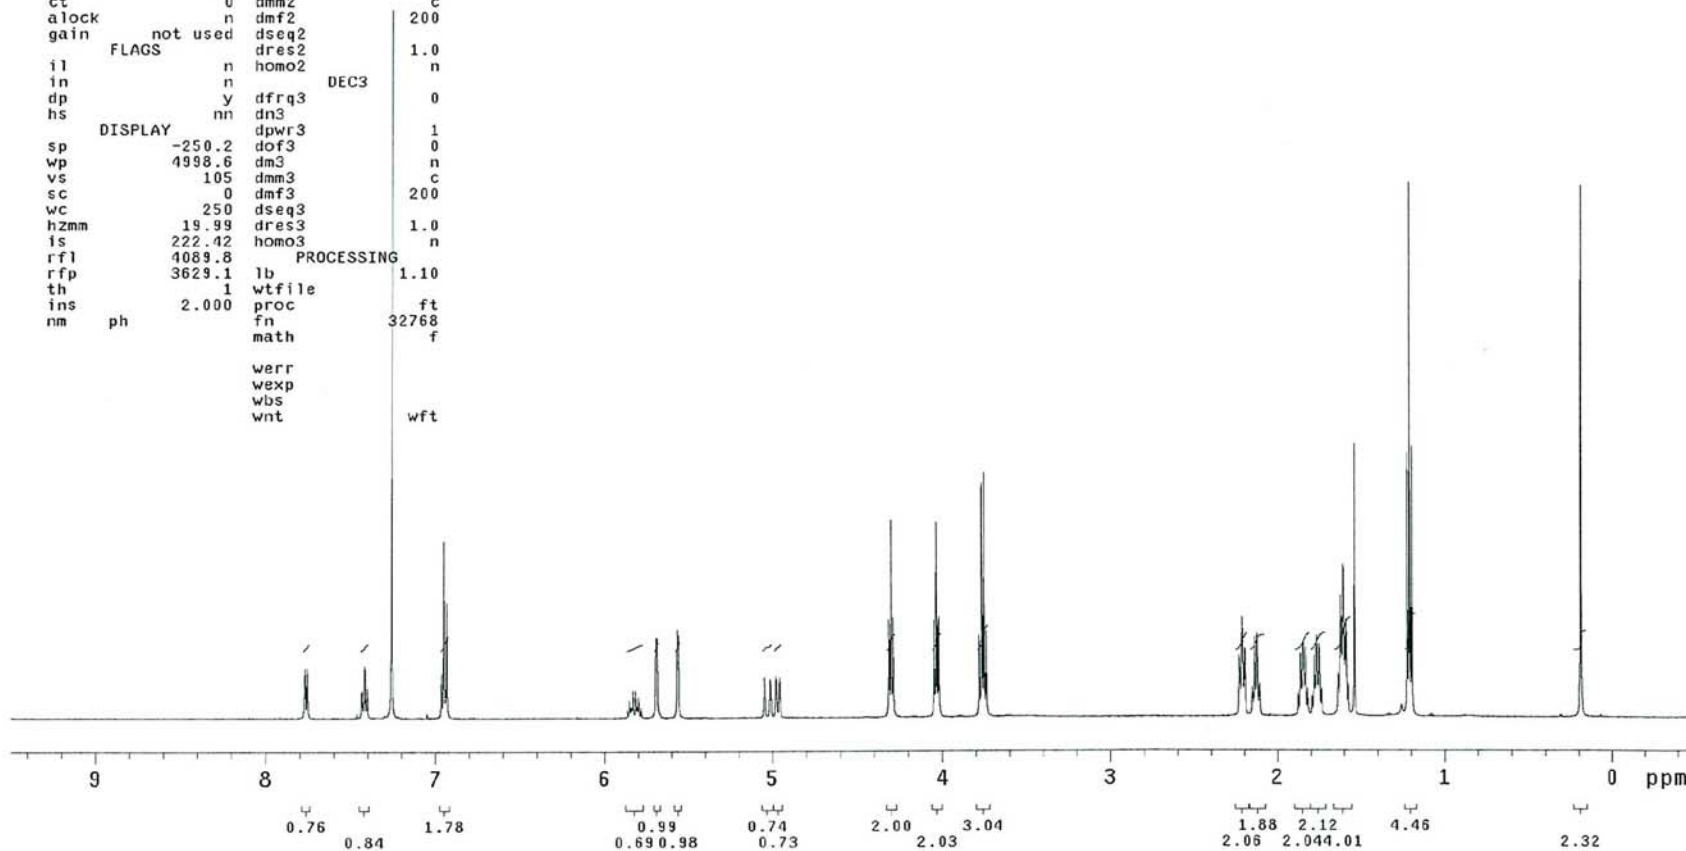

S71

WYKELN5137\_13C

exp2 s2pu1

| SAMPLE      |            | DEC. & VT  |          |
|-------------|------------|------------|----------|
| date        | Apr 1 2010 | dfrq       | 499.874  |
| solvent     | CDC13      | dn         | H1       |
| file        | exp        | dpwr       | 48       |
| ACQUISITION |            |            |          |
| sfrq        | 125.707    | dm         | yyy      |
| tn          | C13        | dmm        | w        |
| at          | 1.092      | dmf        | 10000    |
| np          | 65536      | dseq       |          |
| sw          | 29996.3    | dres       | 1.0      |
| fb          | not used   | homo       | n        |
| bs          | 16         | temp       | 25.0     |
| tpwr        | 55         | DEC2       |          |
| pw          | 4.2        | dfrq2      | 0        |
| d1          | 0          | dn2        |          |
| tof         | 2000.0     | dpwr2      | 1        |
| nt          | 9999       | dof2       | 0        |
| ct          | 0          | dm2        | n        |
| alock       | n          | dmm2       | c        |
| gain        | not used   | dmf2       | 10000    |
| FLAGS       |            |            |          |
| il          | n          | dres2      | 1.0      |
| in          | n          | homo2      | n        |
| dp          | y          | DEC3       |          |
| hs          | nn         | dfrq3      | 0        |
| DISPLAY     |            |            |          |
| sp          | -1088.7    | dn3        |          |
| wp          | 29995.3    | dpwr3      | 1        |
| vs          | 27         | dof3       | 0        |
| sc          | 0          | dm3        | n        |
| wc          | 250        | dmm3       | c        |
| hzmm        | 119.98     | dmf3       | 10000    |
| is          | 500.00     | dseq3      |          |
| rfl         | 10768.0    | dres3      | 1.0      |
| rfp         | 9678.3     | homo3      | n        |
| th          | 2          | PROCESSING |          |
| ins         | 100.000    | lb         | 1.00     |
| nm          | cdc ph     | wfile      |          |
|             |            | proc       | ft       |
|             |            | fn         | not used |
|             |            | math       | f        |
|             |            | werr       |          |
|             |            | wexp       |          |
|             |            | wbs        |          |
|             |            | wnt        |          |

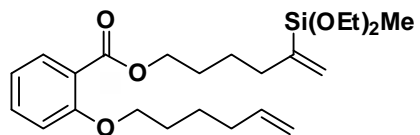

3b also as 20a

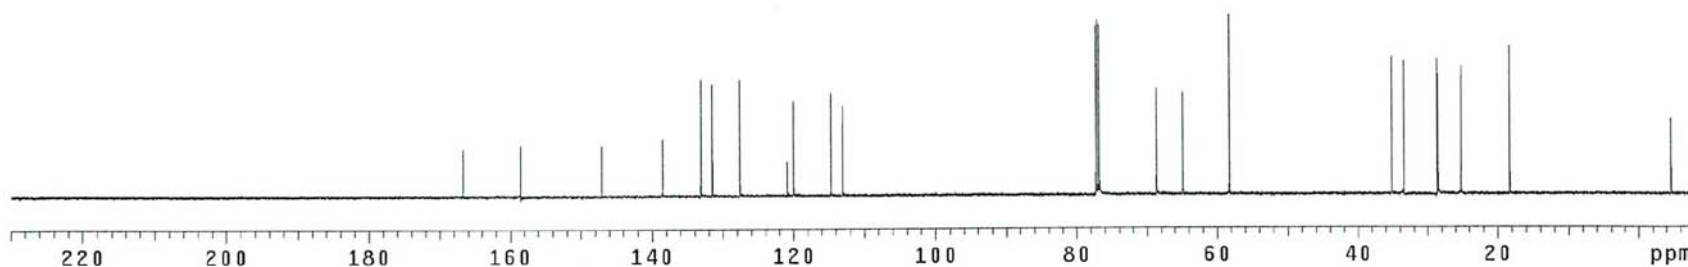



WYKELN10016\_1H

exp1 s2pu1

```
SAMPLE          DEC. & VT
date Apr 5 2010 dfrq      499.874
solvent CDC13      dn       H1
file /export/home/~ dpwr     30
ds2/vnmrsys/data/i~ dof     0
500c/schreiber/WAN~ dm       nnn
G/Pub1/WYKELN10016~ dmm     c
1H.fid          dmf     200
ACQUISITION
sfrq      499.875 dres     1.0
tn        H1      homo    n
at        2.184   temp    25.0
np        32768
sw        7501.2  lb       1.10
fb        not used wtfile
bs        4      proc     ft
ss        2      fn       32768
tpwr     62     math     f
pw        12.0
d1        0      werr
tof       800.0 wexp
nt        32    wbs
ct        32    wnt      wft
alock     n
gain      not used
FLAGS
il        n
in        n
dp        y
hs        nn
DISPLAY
sp        -250.2
wp        4998.6
vs        83
sc        0
wc        250
hzmm     19.89
is        452.73
rfl      4089.8
rfp      3629.1
th        1
ins      2.000
nm        ph
```

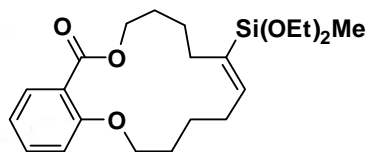

4b also as 20

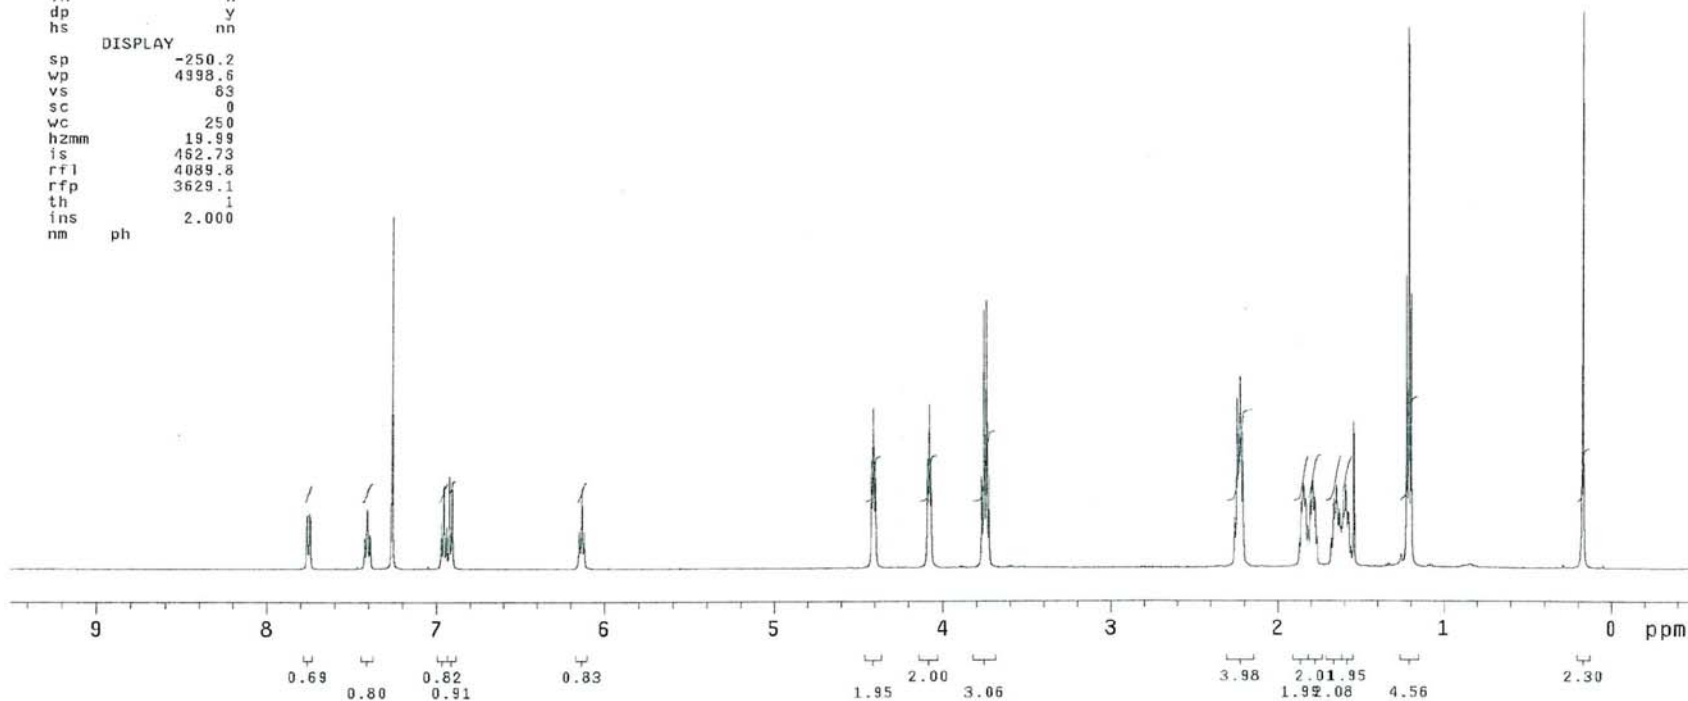

S73

WYKELN10016\_13C

exp4 s2pu1

| SAMPLE      |            | DEC. & VT  |          |
|-------------|------------|------------|----------|
| date        | Apr 5 2010 | dfrq       | 499.874  |
| solvent     | CDC13      | dn         | H1       |
| file        | exp        | dpwr       | 48       |
| ACQUISITION |            |            |          |
| sfrq        | 125.707    | dm         | yyy      |
| tn          | C13        | dmm        | w        |
| at          | 1.092      | dmf        | 10000    |
| np          | 65536      | dseq       |          |
| sw          | 29996.3    | dres       | 1.0      |
| fb          | not used   | homo       | n        |
| bs          | 4          | temp       | 25.0     |
| tpwr        | 55         | DEC2       |          |
| pw          | 4.2        | dfrq2      | 0        |
| d1          | 0          | dn2        |          |
| tof         | 2000.0     | dpwr2      | 1        |
| nt          | 99999      | dof2       | 0        |
| ct          | 744        | dm2        | n        |
| alock       | n          | dmm2       | c        |
| gain        | not used   | dmf2       | 10000    |
| FLAGS       |            |            |          |
| il          | n          | dres2      | 1.0      |
| in          | n          | homo2      | n        |
| dp          | y          | DEC3       |          |
| hs          | nn         | dfrq3      | 0        |
| DISPLAY     |            |            |          |
| sp          | -1087.8    | dn3        |          |
| wp          | 29995.3    | dpwr3      | 1        |
| vs          | 35         | dof3       | 0        |
| sc          | 0          | dm3        | n        |
| wc          | 250        | dmm3       | c        |
| hzmm        | 119.98     | dmf3       | 10000    |
| is          | 500.00     | dseq3      |          |
| rfl         | 10767.1    | dres3      | 1.0      |
| rfp         | 9678.3     | homo3      | n        |
| th          | 2          | PROCESSING |          |
| ins         | 100.000    | lb         | 1.00     |
| nm          | cdc ph     | wfile      |          |
|             |            | proc       | ft       |
|             |            | fn         | not used |
|             |            | math       | f        |
|             |            | werr       |          |
|             |            | wexp       |          |
|             |            | wbs        |          |
|             |            | wnt        |          |

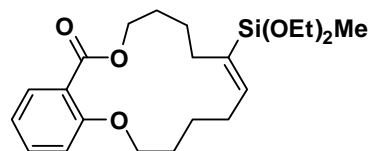

4b also as 20

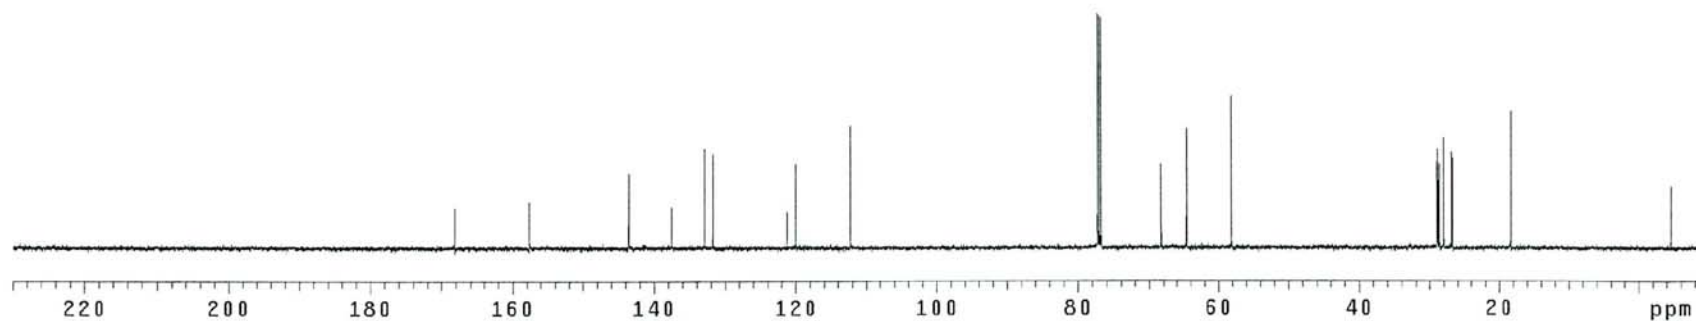

S74

WYKELN5162\_1H

expl s2pu1

SAMPLE DEC. & VT  
date Apr 7 2010 dfrq 499.874  
solvent CDC13 dn H1  
file /export/home/~ dpwr 30  
ds2/vnmrsys/data/1~ dof 0  
500c/schreiber/WAN~ dm nnn  
G/Pub1/WYKELN5162\_~ dmm c  
1H.fid dmf 200  
ACQUISITION  
sfrq 499.875 dres 1.0  
tn H1 homo n  
at 2.184 temp 25.0  
np 32768  
sw 7501.2 lb 1.10  
fb not used wtfile  
bs 4 proc ft  
ss 2 fn 32768  
tpwr 62 math f  
pw 12.0  
d1 0 werr  
tof 800.0 wexp  
nt 32 wbs  
ct 32 wnt  
alock n  
gain not used  
FLAGS  
fl n  
in n  
dp y  
hs nn  
DISPLAY  
sp -250.2  
wp 4998.6  
vs 151  
sc 0  
wc 250  
hzmm 19.89  
is 578.05  
rfl 4089.8  
rfp 3629.1  
th 7  
ins 2.000  
nm ph

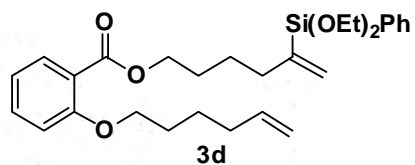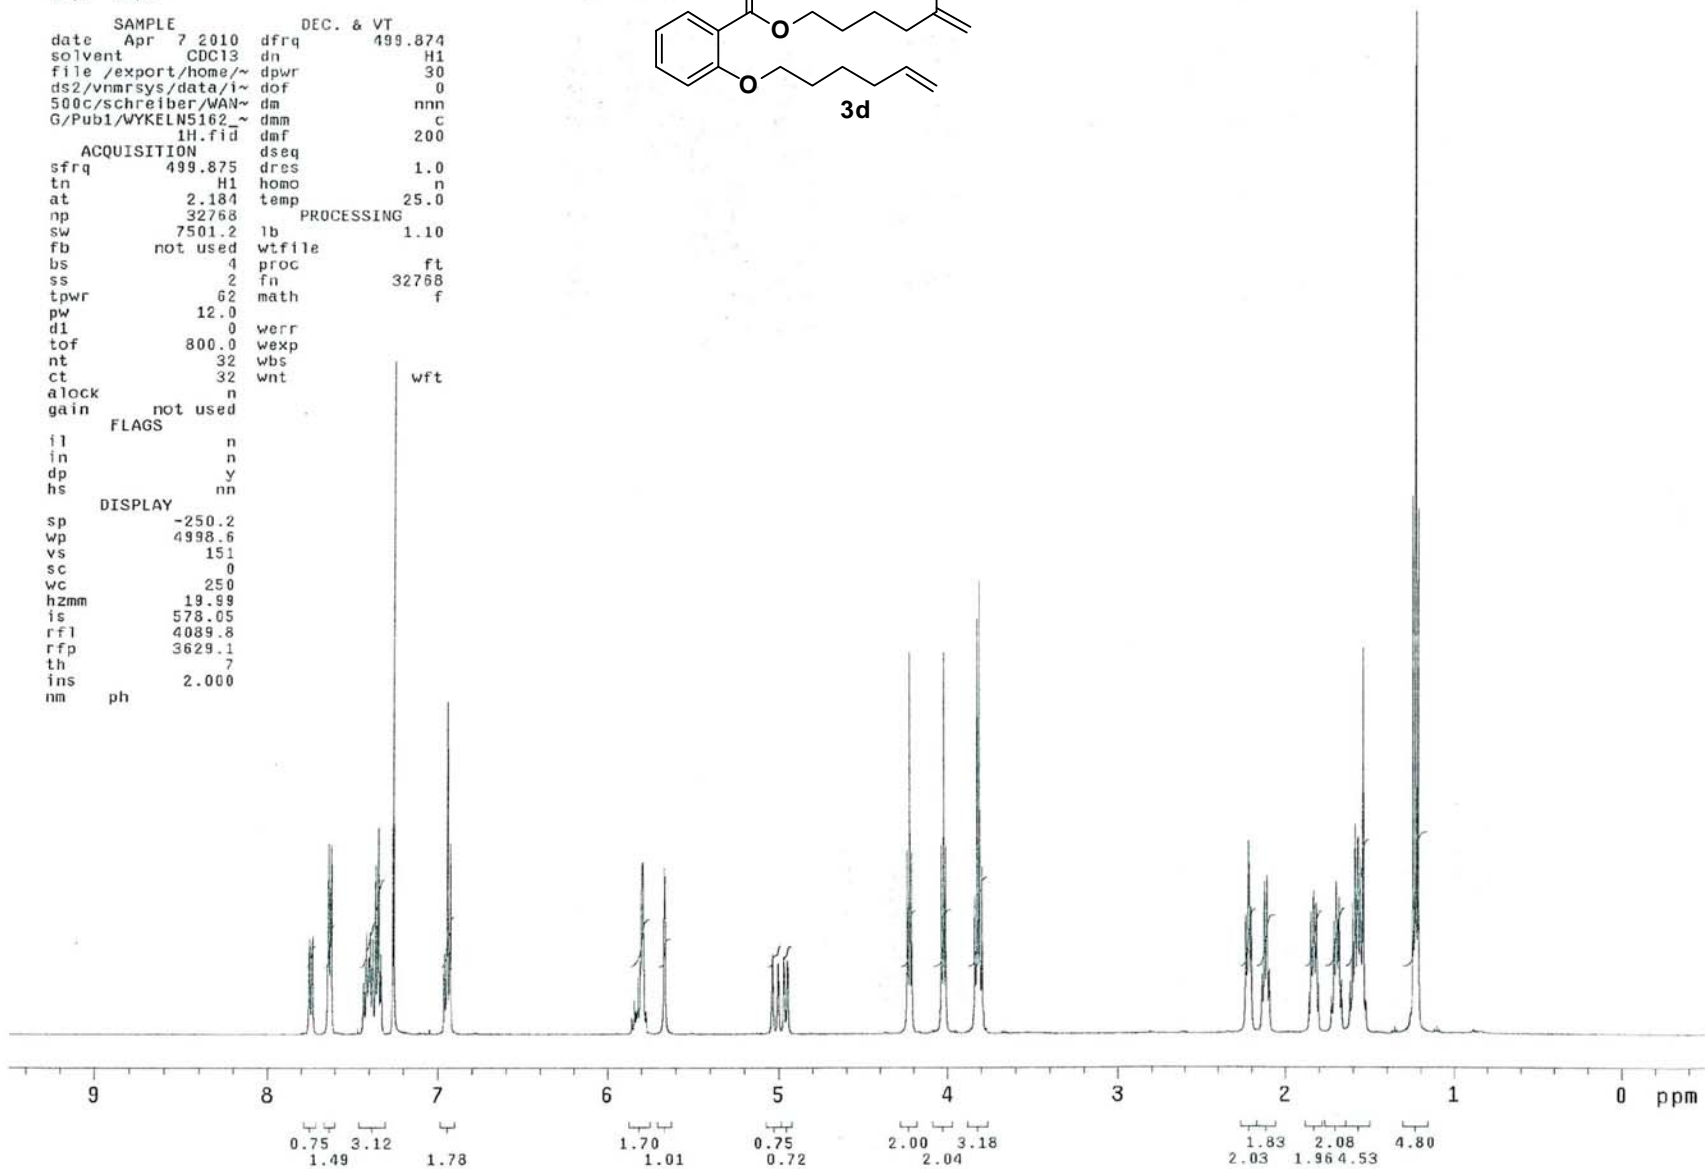

S75

WYKELN5162\_13C

exp2 s2pu1

| SAMPLE      |            | DEC. & VT  |          |
|-------------|------------|------------|----------|
| date        | Apr 7 2010 | dfrq       | 499.874  |
| solvent     | CDC13      | dn         | H1       |
| file        | exp        | dpwr       | 48       |
| ACQUISITION |            | dof        | 0        |
| sfrq        | 125.707    | dm         | YYY      |
| tn          | C13        | dmm        | w        |
| at          | 1.092      | dmf        | 10000    |
| np          | 65536      | dseq       |          |
| sw          | 29996.3    | dres       | 1.0      |
| fb          | not used   | homo       | n        |
| bs          | 16         | temp       | 25.0     |
| tpwr        | 55         | DEC2       |          |
| pw          | 4.2        | dfrq2      | 0        |
| d1          | 0          | dn2        |          |
| tof         | 2000.0     | dpwr2      | 1        |
| nt          | 99999      | dof2       | 0        |
| ct          | 1200       | dm2        | n        |
| alock       | n          | dmm2       | c        |
| gain        | not used   | dmf2       | 10000    |
| FLAGS       |            | dseq2      |          |
| il          | n          | dres2      | 1.0      |
| in          | n          | homo2      | n        |
| dp          | y          | DEC3       |          |
| hs          | nn         | dfrq3      | 0        |
| DISPLAY     |            | dn3        |          |
| sp          | -1088.7    | dpwr3      | 1        |
| wp          | 29995.3    | dof3       | 0        |
| vs          | 33         | dm3        | n        |
| sc          | 0          | dmm3       | c        |
| wc          | 250        | dmf3       | 10000    |
| hzmm        | 119.98     | dseq3      |          |
| is          | 500.00     | dres3      | 1.0      |
| rfl         | 10768.0    | homo3      | n        |
| rfp         | 9678.3     | PROCESSING |          |
| th          | 3          | lb         | 1.00     |
| ins         | 100.000    | wfile      |          |
| nm          | cdc ph     | proc       | ft       |
|             |            | fn         | not used |
|             |            | math       | f        |
|             |            | werr       |          |
|             |            | wexp       |          |
|             |            | wbs        |          |
|             |            | wnt        |          |

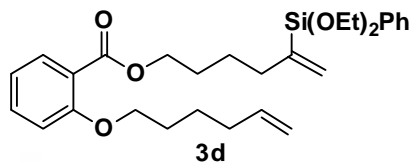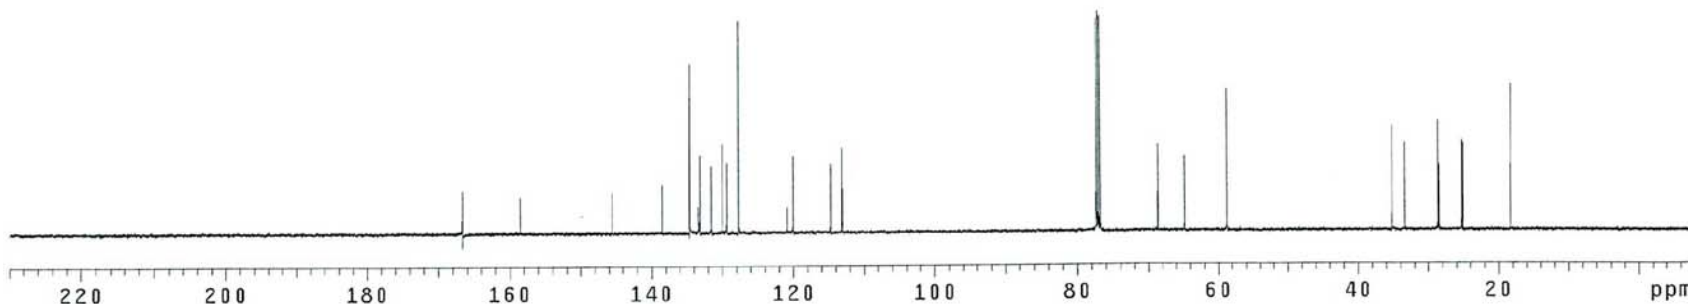

S76

WYKELN5135\_1H

exp1 s2pu1

```
SAMPLE          DEC. & VT
date    Apr 1 2010  dfrq      499.874
solvent  CDC13      dn        H1
file    /export/home/~ dpwr      30
ds2/vnmr/sys/data/i~ dof       0
500c/schreiber/WAN~ dm        nnn
G/Pub1/WYKELN5135~ dmm       c
              1H.fid  dmf      200
ACQUISITION
sfrq     499.875  dres     1.0
tn       H1      homo     n
at       2.184   temp    25.0
np       32768
sw       7501.2  lb       1.10
fb       not used wtfile
bs       4      proc     ft
ss       2      fn      32768
tpwr     62     math     f
pw       12.0
d1       0      werr
tof      800.0  wexp
nt       32     wbs
ct       0      wnt
alock    n
gain     not used
FLAGS
il       n
in       n
dp       y
hs       nn
DISPLAY
sp       -250.2
wp       4998.6
vs       105
sc       0
wc       250
hzmm     19.99
is       448.17
rfl      4089.8
rfp      3629.1
th       1
ins      2.000
nm       ph
```

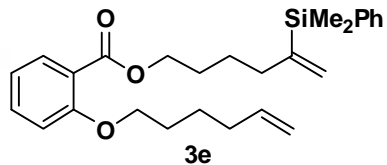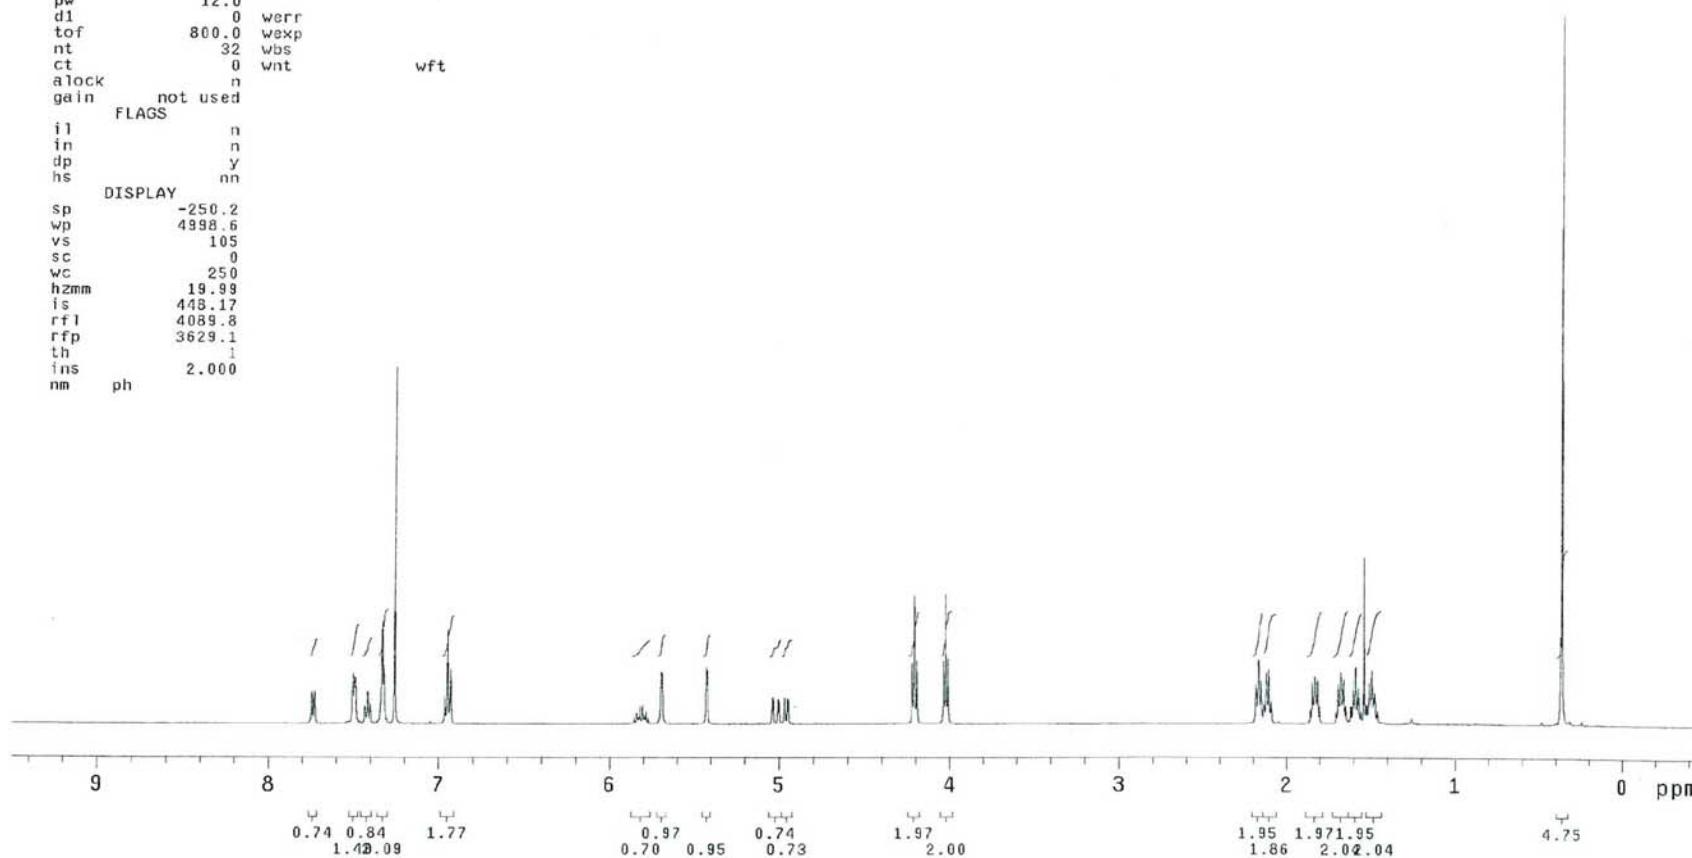

S77

WYKELN5135\_13C

exp2 s2pu1

| SAMPLE      |            | DEC. & VT |          |
|-------------|------------|-----------|----------|
| date        | Apr 1 2010 | dfrq      | 499.874  |
| solvent     | CDC13      | dn        | H1       |
| file        | exp        | dpwr      | 48       |
| ACQUISITION |            |           |          |
| sfrq        | 125.707    | dof       | 0        |
| tn          | C13        | dm        | yyy      |
| at          | 1.092      | dmm       | w        |
| np          | 65536      | dmf       | 10000    |
| sw          | 29995.3    | dseq      |          |
| fb          | not used   | dres      | 1.0      |
| bs          | 4          | homo      | n        |
| tpwr        | 55         | temp      | 25.0     |
| DEC2        |            |           |          |
| pw          | 4.2        | dfrq2     | 0        |
| d1          | 0          | dn2       |          |
| tof         | 2000.0     | dpwr2     | 1        |
| nt          | 9999       | dof2      | 0        |
| ct          | 0          | dm2       | n        |
| alock       | n          | dmm2      | c        |
| gain        | not used   | dmf2      | 10000    |
| DEC3        |            |           |          |
| il          | FLAGS      | dseq2     |          |
| in          | n          | dres2     | 1.0      |
| dp          | y          | homo2     | n        |
| hs          | nn         | dfrq3     | 0        |
| DISPLAY     |            |           |          |
| sp          | -1091.5    | dn3       |          |
| wp          | 29995.3    | dpwr3     | 1        |
| vs          | 27         | dof3      | 0        |
| sc          | 0          | dm3       | n        |
| wc          | 250        | dmm3      | c        |
| hzmm        | 119.98     | dmf3      | 10000    |
| is          | 500.00     | dseq3     |          |
| rfl         | 10770.7    | dres3     | 1.0      |
| rfp         | 9678.3     | homo3     | n        |
| PROCESSING  |            |           |          |
| th          | 2          | lb        | 1.00     |
| ins         | 100.000    | wtfile    |          |
| nm          | cdc ph     | proc      | ft       |
|             |            | fn        | not used |
|             |            | math      | f        |
|             |            | werr      |          |
|             |            | wexp      |          |
|             |            | wbs       |          |
|             |            | wnt       |          |

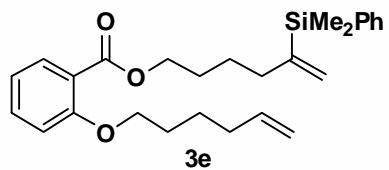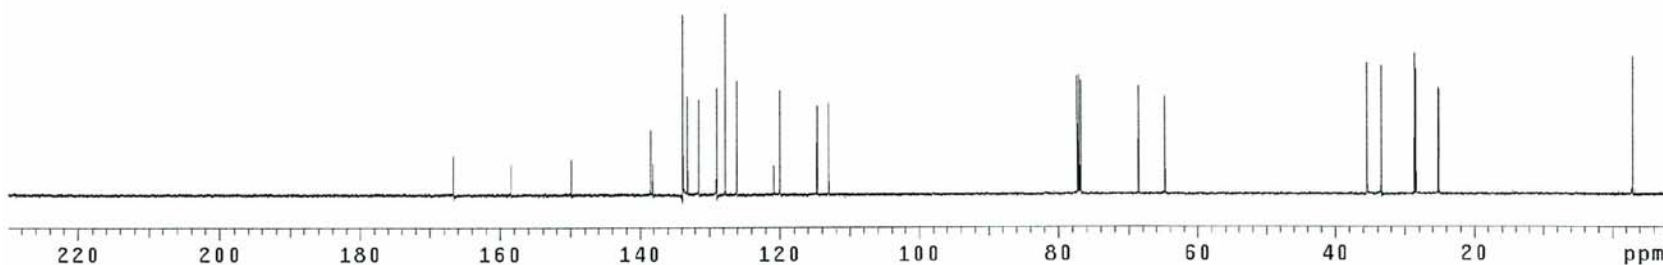

S78

WYKELN10017\_1H

expl s2pu1

```
SAMPLE          DEC. & VT
date Apr 5 2010 dfrq      499.874
solvent CDC13      dn       H1
file /export/home/~ dpwr      30
ds2/vnmrsys/data/i~ dof       0
500c/schreiber/WAN~ dm        nnn
G/Pub1/WYKELN10017~ dmm       c
_1H.fid         dmf      200
ACQUISITION
sfrq      499.875 dres      1.0
tn        H1      homo      n
at        2.184   temp     25.0
np        32768   PROCESSING
sw        7501.2  lb        1.10
fb        not used wtfile
bs        4       proc      ft
ss        2       fn       32768
tpwr     62      math      f
pw       12.0
d1        0      verr
tof       800.0 wexp
nt        32    wbs
ct        32    wnt
alock     n
gain     not used
FLAGS
il        n
in        n
dp        y
hs        nn
DISPLAY
sp       -250.2
wp       4998.6
vs       125
sc        0
wc       250
hzmm     19.99
is       276.07
rfl     4089.8
rfp     3629.1
th        1
ins     2.000
nm      ph
```

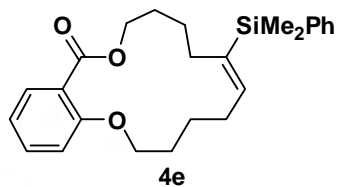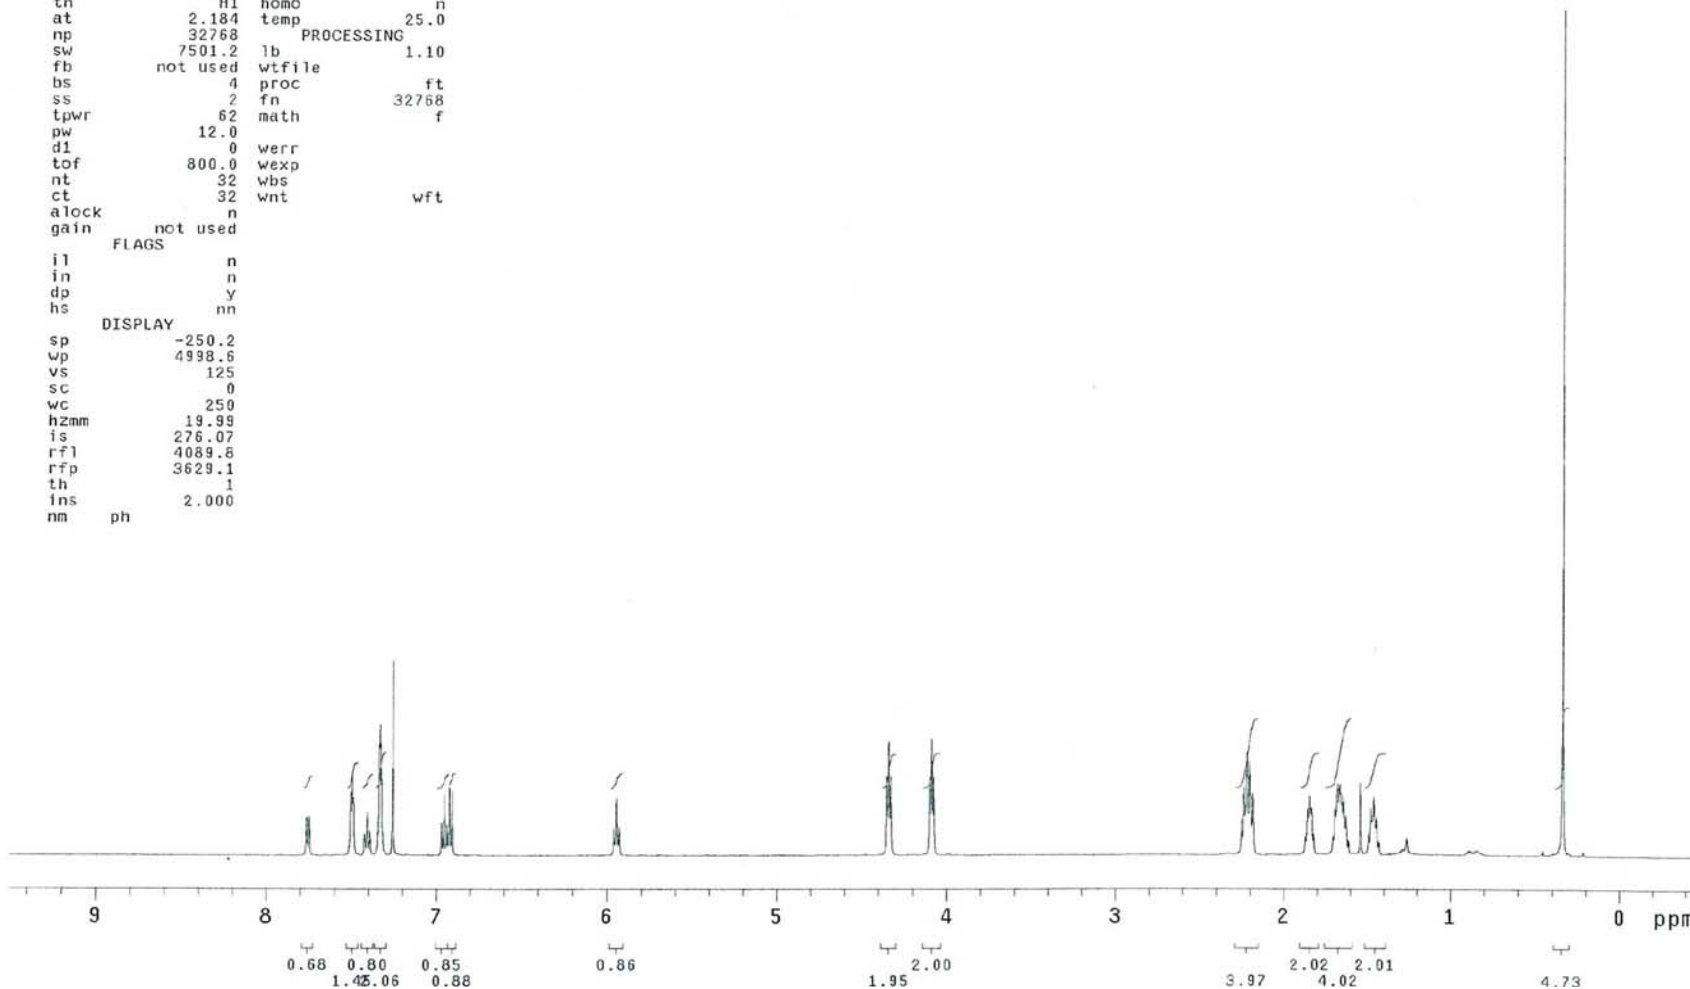

S79

WYKELN10017\_13C

exp4 s2pu1

| SAMPLE      |            | DEC. & VT  |          |
|-------------|------------|------------|----------|
| date        | Apr 5 2010 | dfrq       | 499.874  |
| solvent     | CDC13      | dn         | H1       |
| file        | exp        | dpwr       | 48       |
| ACQUISITION |            |            |          |
| sfrq        | 125.707    | dm         | yyy      |
| tn          | C13        | dmm        | w        |
| at          | 1.092      | dmf        | 10000    |
| np          | 65536      | dseq       |          |
| sw          | 29996.3    | dres       | 1.0      |
| fb          | not used   | homo       | n        |
| bs          | 16         | temp       | 25.0     |
| tpwr        | 55         | DEC2       |          |
| pw          | 4.2        | dfrq2      | 0        |
| d1          | 0          | dn2        |          |
| tof         | 2000.0     | dpwr2      | 1        |
| nt          | 99999      | dof2       | 0        |
| ct          | 2048       | dm2        | n        |
| alock       | n          | dmm2       | c        |
| gain        | not used   | dmf2       | 10000    |
| FLAGS       |            |            |          |
| il          | n          | dseq2      |          |
| in          | n          | dres2      | 1.0      |
| dp          | y          | homo2      | n        |
| hs          | nn         | DEC3       |          |
| DISPLAY     |            |            |          |
| sp          | -1087.8    | dfrq3      | 0        |
| wp          | 29995.3    | dn3        |          |
| vs          | 80         | dpwr3      | 1        |
| sc          | 0          | dof3       | 0        |
| wc          | 250        | dm3        | n        |
| hzmm        | 119.98     | dmm3       | c        |
| is          | 500.00     | dmf3       | 10000    |
| rfl         | 10767.1    | dseq3      |          |
| rfp         | 9678.3     | dres3      | 1.0      |
| th          | 4          | homo3      | n        |
| ins         | 100.000    | PROCESSING |          |
| nm          | cdc ph     | lb         | 1.00     |
|             |            | wtfile     |          |
|             |            | proc       | ft       |
|             |            | fn         | not used |
|             |            | math       | f        |
|             |            | werr       |          |
|             |            | wexp       |          |
|             |            | wbs        |          |
|             |            | wnt        |          |

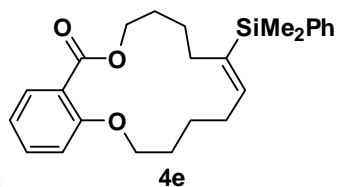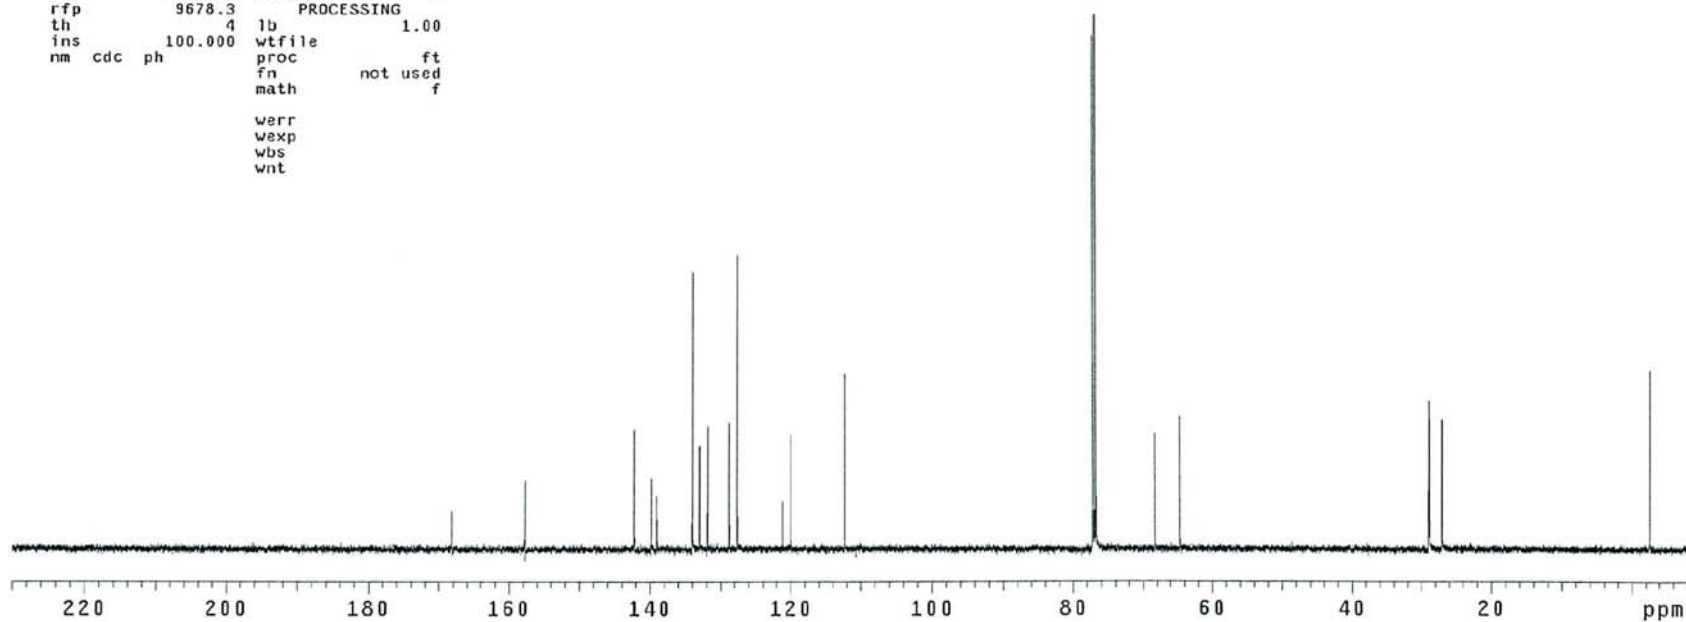

S80



WYKELN5136\_1H

exp1 s2pu1

```
SAMPLE          DEC. & VT
date Apr 6 2010 dfrq      499.874
solvent CDC13      dn       H1
file /export/home/~ dpwr     30
ds2/vnmrsys/data/i~ dof      0
500c/schreiber/WAN~ dm       nnn
G/Pub1/WYKELN5136_~ dmm      c
1H.fid          dmF       200
ACQUISITION
sfrq      499.875 dseq     1.0
tn         H1      dres     n
at         2.184   homo     n
np         32768   temp    25.0
sw         7501.2 PROCESSING
fb         not used lb       1.10
bs         4       wtfile
ss         2       proc
tpwr       62     math
pw         12.0
d1         0       werr
tof        800.0 wexp
nt         32     wbs
ct         32     wnt
alock      not used n
gain      not used n
          FLAGS
il         n
in         n
dp         y
hs         nn
          DISPLAY
sp        -250.2
wp        4998.6
vs        102
sc         0
wc         250
hzmm      19.99
is        350.14
rf1       4089.8
rfp       3629.1
th         1
ins       2.000
nm        ph
```

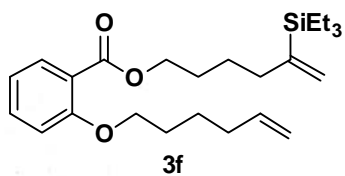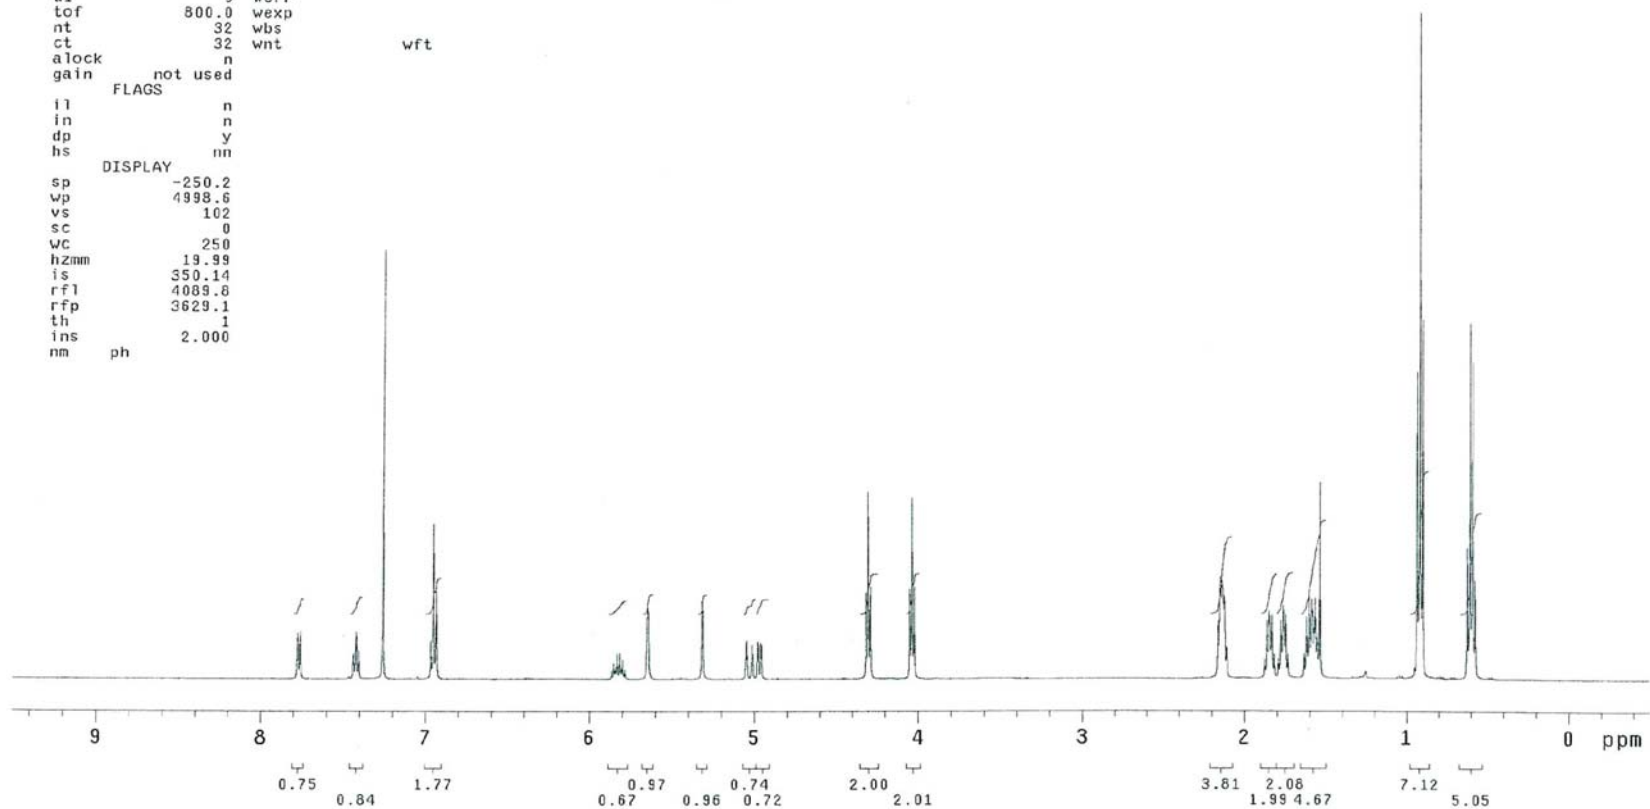

WYKELN5136\_13C

exp4 s2pu1

| SAMPLE      |            | DEC. & VT  |          |
|-------------|------------|------------|----------|
| date        | Apr 6 2010 | dfrq       | 499.874  |
| solvent     | CDC13      | dn         | H1       |
| file        | exp        | dpwr       | 48       |
| ACQUISITION |            | dof        | 0        |
| sfrq        | 125.707    | dm         | yyy      |
| tn          | C13        | dmm        | w        |
| at          | 1.092      | dmf        | 10000    |
| np          | 65536      | dseq       |          |
| sw          | 29995.3    | dres       | 1.0      |
| fb          | not used   | homo       | n        |
| bs          | 16         | temp       | 25.0     |
| tpwr        | 55         | DEC2       |          |
| pw          | 4.2        | dfrq2      | 0        |
| d1          | 0          | dn2        |          |
| tof         | 2000.0     | dpwr2      | 1        |
| nt          | 99999      | dof2       | 0        |
| ct          | 960        | dm2        | n        |
| alock       | not used   | dmm2       | c        |
| gain        | not used   | dmf2       | 10000    |
| FLAGS       |            | dseq2      |          |
| il          | n          | dres2      | 1.0      |
| in          | n          | homo2      | n        |
| dp          | y          | DEC3       |          |
| hs          | nn         | dfrq3      | 0        |
| DISPLAY     |            | dn3        |          |
| sp          | -1087.8    | dpwr3      | 1        |
| wp          | 29995.3    | dof3       | 0        |
| vs          | 75         | dm3        | n        |
| sc          | 0          | dmm3       | c        |
| wc          | 250        | dmf3       | 10000    |
| hzmm        | 119.98     | dseq3      |          |
| is          | 500.00     | dres3      | 1.0      |
| rfl         | 10767.1    | homo3      | n        |
| rpf         | 9678.3     | PROCESSING |          |
| th          | 6          | lb         | 1.00     |
| ins         | 100.000    | wfile      |          |
| nm          | cdc ph     | proc       | ft       |
|             |            | fn         | not used |
|             |            | math       | f        |
|             |            | werr       |          |
|             |            | wexp       |          |
|             |            | wbs        |          |
|             |            | wnt        |          |

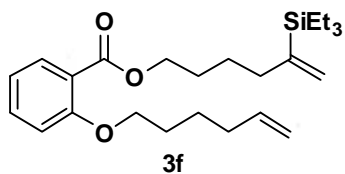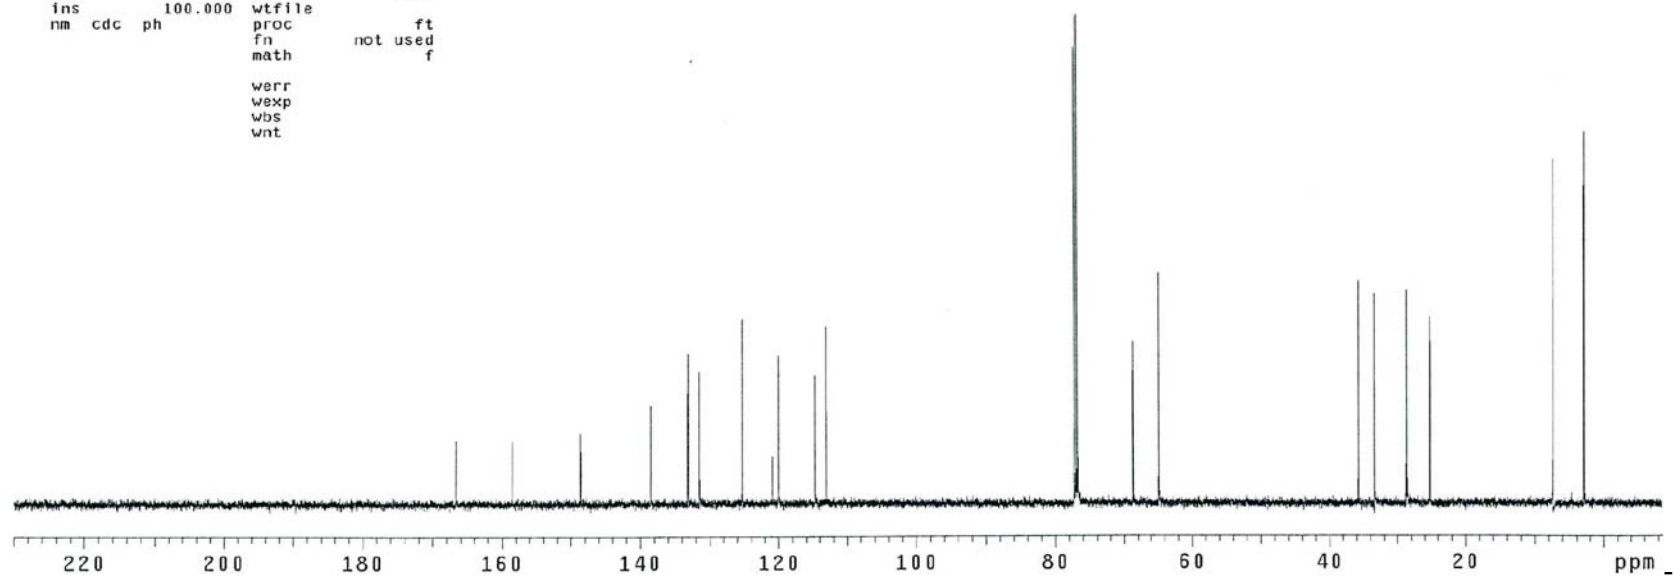

WYKELN4196\_1H

expl s2pu1

```
SAMPLE          DEC. & VT
date    May 21 2010  dfrq      499.874
solvent  CDC13      dn        H1
file    /export/home/~ dpwr      30
ds2/vnmrsys/data/1~  dof       0
500c/schreiber/WAN~  dm        nnn
G/Pub1/WYKELN4196~  dmm       c
                  1H.fid    dmf      200
ACQUISITION      dseq      1.0
sfrq      499.875  dres      1.0
tn        H1      homo      n
at        2.184   temp     24.0
          32768
np        7501.2  lb        1.10
sw        not used wtfile
fb        4      proc       ft
bs        2      fn        32768
ss        62     math       f
tpwr
pw        12.0
d1        0      werr
tof       800.0  wexp
nt        32
ct        32    wnt        wft
alock     n
gain     not used
          FLAGS
il        n
ln        n
dp        y
hs        nn
          DISPLAY
sp        -250.2
wp        4998.6
vs        86
sc        0
wc        250
hzmm     19.99
is       1373.20
rf1      4080.8
rfp      3629.1
th        7
ins      2.000
nm        ph
```

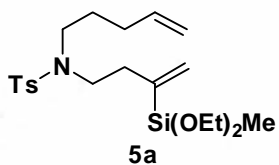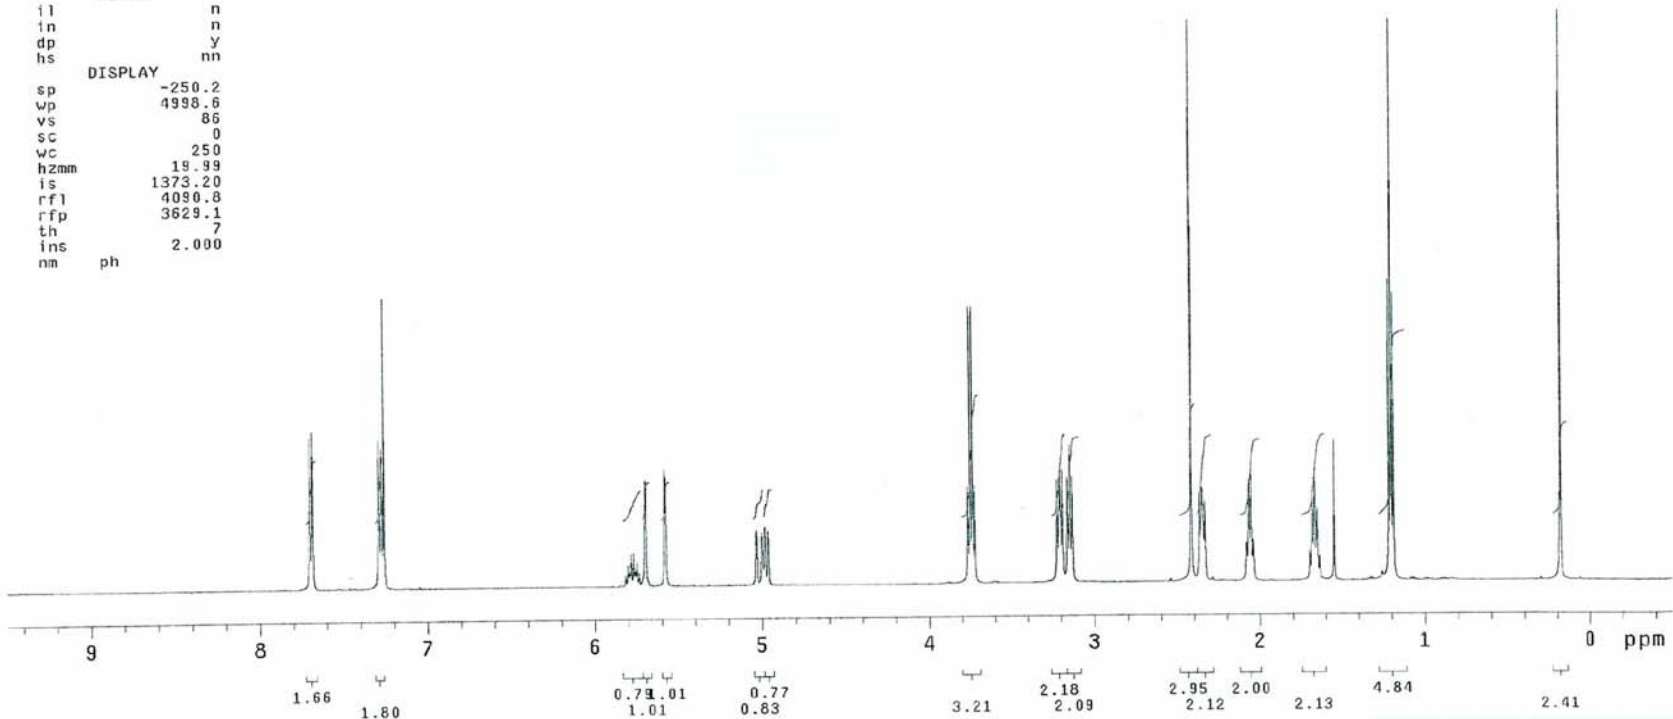

WYKELN4196\_13C

exp2 s2pu1

| SAMPLE      |             | DEC. & VT  |          |
|-------------|-------------|------------|----------|
| date        | May 21 2010 | dfrq       | 499.874  |
| solvent     | CDC13       | dn         | H1       |
| file        | exp         | dpwr       | 48       |
| ACQUISITION |             |            |          |
| sfrq        | 125.707     | dof        | 0        |
| tn          | C13         | dm         | yyy      |
| at          | 1.092       | dmm        | w        |
| np          | 65536       | dmm        | 10000    |
| sw          | 29996.3     | dseq       | 1.0      |
| fb          | not used    | dres       | n        |
| bs          | 32          | temp       | 24.0     |
| tpwr        | 55          | DEC2       | 0        |
| pw          | 4.2         | dfrq2      | 0        |
| d1          | 0           | dn2        |          |
| tof         | 2000.0      | dpwr2      | 1        |
| nt          | 99999       | dof2       | 0        |
| ct          | 704         | dm2        | n        |
| alock       | n           | dmm2       | c        |
| gain        | not used    | dmm2       | 10000    |
| FLAGS       |             |            |          |
| il          | n           | dseq2      | 1.0      |
| in          | n           | dres2      | n        |
| dp          | y           | homo2      | n        |
| hs          | nn          | DEC3       | 0        |
| DISPLAY     |             |            |          |
| sp          | -1089.7     | dfrq3      | 0        |
| wp          | 29995.3     | dn3        | 1        |
| vs          | 27          | dpwr3      | 0        |
| sc          | 0           | dof3       | n        |
| vc          | 250         | dm3        | n        |
| hzmm        | 119.98      | dmm3       | c        |
| ls          | 500.00      | dmm3       | 10000    |
| rfl         | 10768.9     | dseq3      | 1.0      |
| rff         | 9678.3      | dres3      | n        |
| th          | 3           | homo3      | n        |
| ins         | 100.000     | PROCESSING |          |
| nm          | cdc ph      | lb         | 1.00     |
|             |             | wifile     |          |
|             |             | proc       | ft       |
|             |             | fn         | not used |
|             |             | math       | f        |
|             |             | werr       |          |
|             |             | wexp       |          |
|             |             | wbs        |          |
|             |             | wnt        |          |

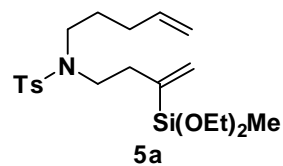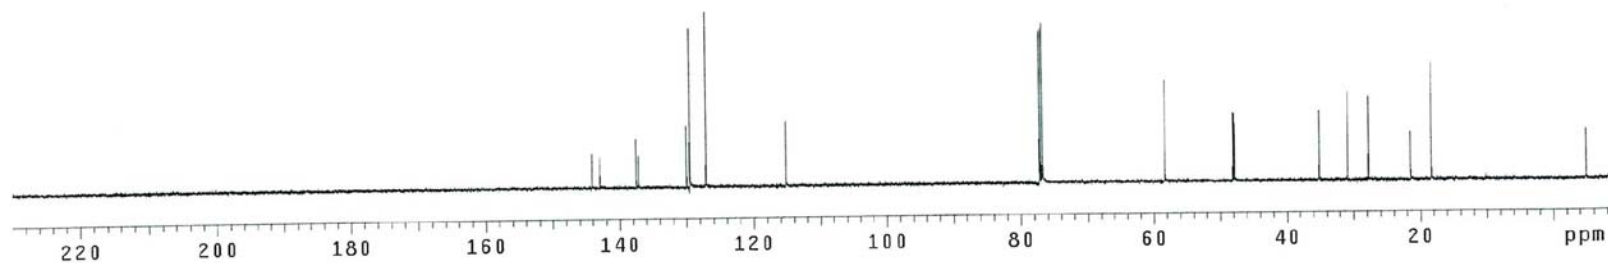

WYKELN10034\_1H

expl s2pu1

```
SAMPLE          DEC. & VT
date   May 22 2010  dfrq   499.874
solvent CDC13      dn      H1
file   /export/home/~ dpwr   30
ds2/vnmrsys/data/~  dof    0
500C/schreiber/WAN~ dm     nnn
G/Pub1/WYKELN10034~ dmm    c
1H.fid          dmf     200
ACQUISITION     dseq
sfrq   499.875  dres   1.0
tn      H1      homo   n
at      2.184   temp   24.0
np      32768   PROCESSING
sw      7501.2  lb     1.10
fb      not used wtfile
bs      4       proc   ft
ss      2       fn     32768
tpwr    62     math   f
pw      12.0
d1      0      werr
tof     800.0  wexp
nt      32     wbs
ct      32     wnt    wft
alock   n
gain    not used
FLAGS
il      n
in      n
dp      y
hs      nn
DISPLAY
sp      -250.2
wp      4998.6
vs      81
sc      0
wc      250
hzmm    19.99
is      354.18
rfl     4090.3
rfp     3629.1
th      7
ins     2.000
nm      ph
```

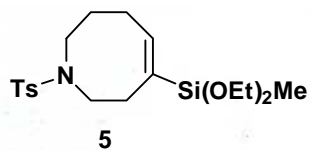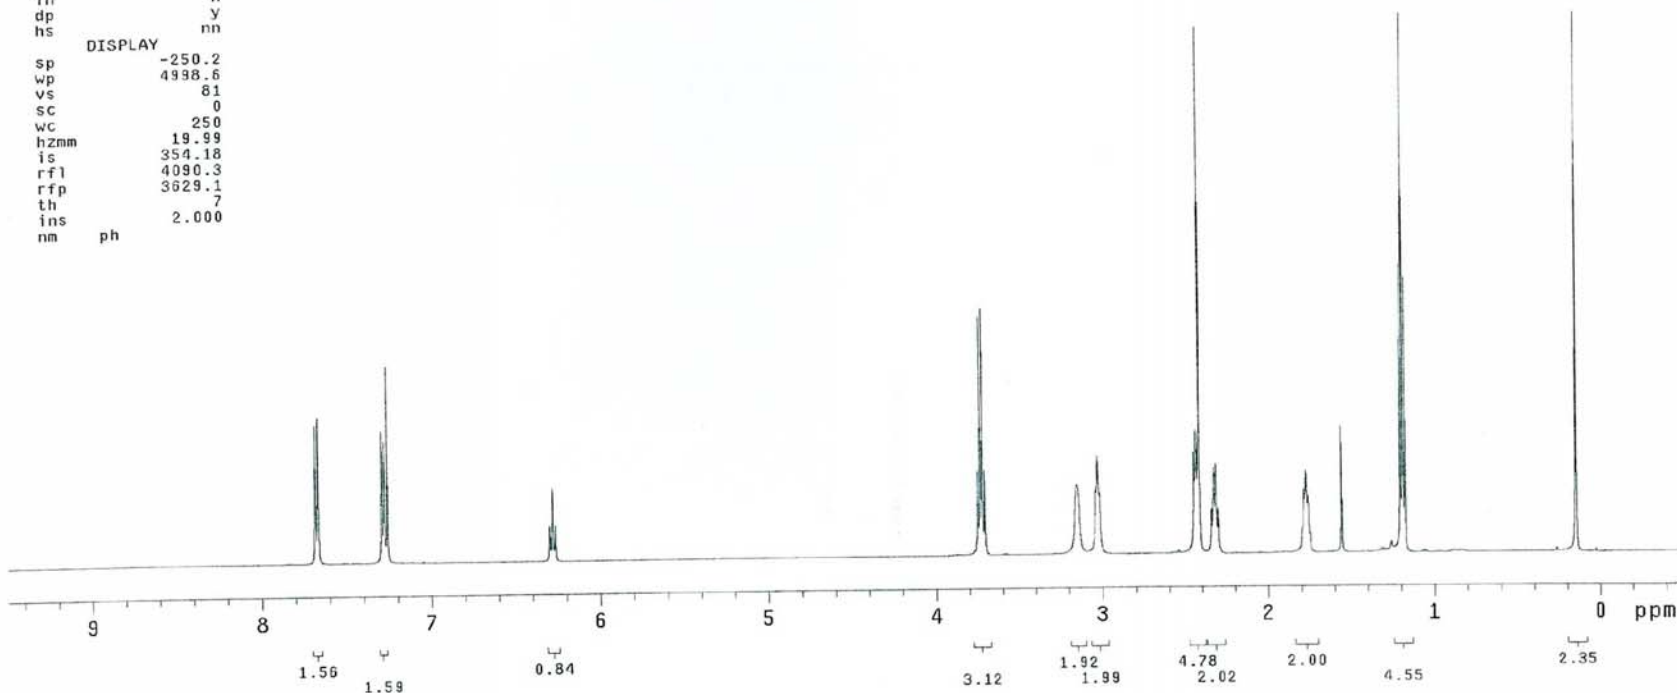

WYKELN10034\_13C

exp1 s2pu1

| SAMPLE      |             | DEC. & VT  |          |
|-------------|-------------|------------|----------|
| date        | May 22 2010 | dfrq       | 499.874  |
| solvent     | CDC13       | dn         | H1       |
| file        | exp         | dpwr       | 48       |
| ACQUISITION |             |            |          |
| sfrq        | 125.707     | dm         | yyy      |
| tn          | C13         | dmm        | w        |
| at          | 1.092       | dmf        | 10000    |
| np          | 65536       | dseq       |          |
| sw          | 29996.3     | dres       | 1.0      |
| fb          | not used    | homo       | n        |
| bs          | 32          | temp       | 24.0     |
| tpwr        | 55          | DEC2       |          |
| pw          | 4.2         | dfrq2      | 0        |
| d1          | 0           | dn2        |          |
| tof         | 2000.0      | dpwr2      | 1        |
| nt          | 99999       | dof2       | 0        |
| ct          | 1248        | dm2        | n        |
| alock       | n           | dmm2       | c        |
| gain        | not used    | dmf2       | 10000    |
| FLAGS       |             |            |          |
| il          | n           | dseq2      | 1.0      |
| in          | n           | dres2      | n        |
| dp          | y           | DEC3       |          |
| hs          | nn          | dfrq3      | 0        |
| DISPLAY     |             |            |          |
| sp          | -1090.6     | dn3        |          |
| wp          | 29995.3     | dpwr3      | 1        |
| vs          | 27          | dof3       | 0        |
| sc          | 0           | dm3        | n        |
| wc          | 250         | dmm3       | c        |
| hzmm        | 119.98      | dmf3       | 10000    |
| is          | 500.00      | dseq3      | 1.0      |
| rfl         | 10763.8     | dres3      | n        |
| rfp         | 9678.3      | homo3      | n        |
| th          | 2           | PROCESSING |          |
| ins         | 100.000     | lb         | 1.00     |
| nm          | cdc ph      | wtfile     |          |
|             |             | proc       | ft       |
|             |             | fn         | not used |
|             |             | math       | f        |
|             |             | werr       |          |
|             |             | wexp       |          |
|             |             | wbs        |          |
|             |             | wnt        |          |

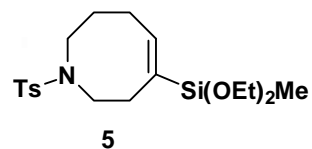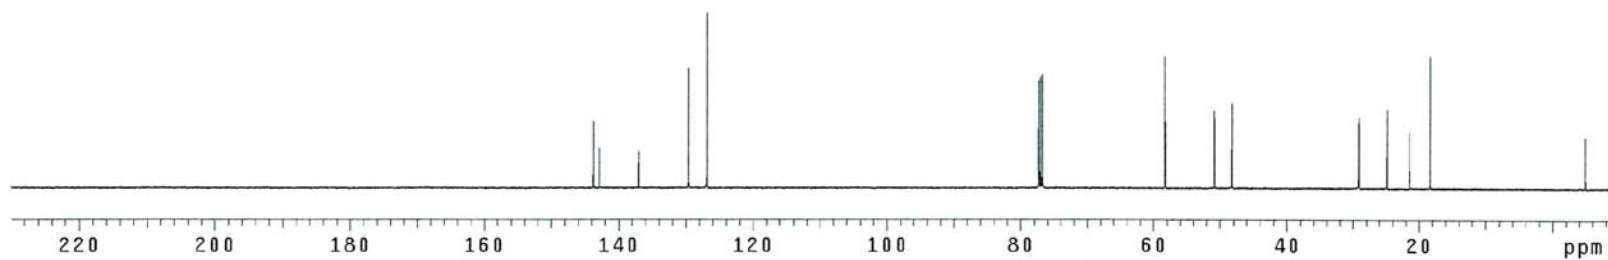

WYKELN19022\_1H

exp1 s2pu1

```
SAMPLE          DEC. & VT
date   Apr 30 2011  dfrq   499.874
solvent CDC13      dn      H1
file    exp        dpwr   30
ACQUISITION      dof     0
sfrq    499.875   dm      mnn
tn      H1        dmm     c
at      2.184     dmf    200
np      32768     dseq   1.0
sw      7501.2    dres   1.0
fb      not used  homo   n
bs      4         temp   25.0
ss      2         DEC2
tpwr    62       dfrq2  0
pw      12.0     dn2    1
d1      0        dpwr2  0
tof     800.0    dof2   0
nt      16       dm2    n
ct      0        dmm2   c
alock   n        dmf2   200
gain    not used dseq2
FLAGS    dres2   1.0
          homo2   n
          DEC3
          dfrq3   0
          dn3
          dpwr3   1
          dof3   0
          dm3    n
          dmm3   c
          dmf3   200
          dseq3  1.0
          dres3  1.0
          homo3  n
          PROCESSING
          lb     1.10
          wtfile
          ins    2.000  proc   ft
          nm    ph     fn     32768
          math    f
          werr
          wexp
          wbs
          wnt      wft
```

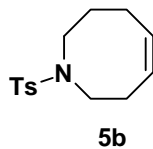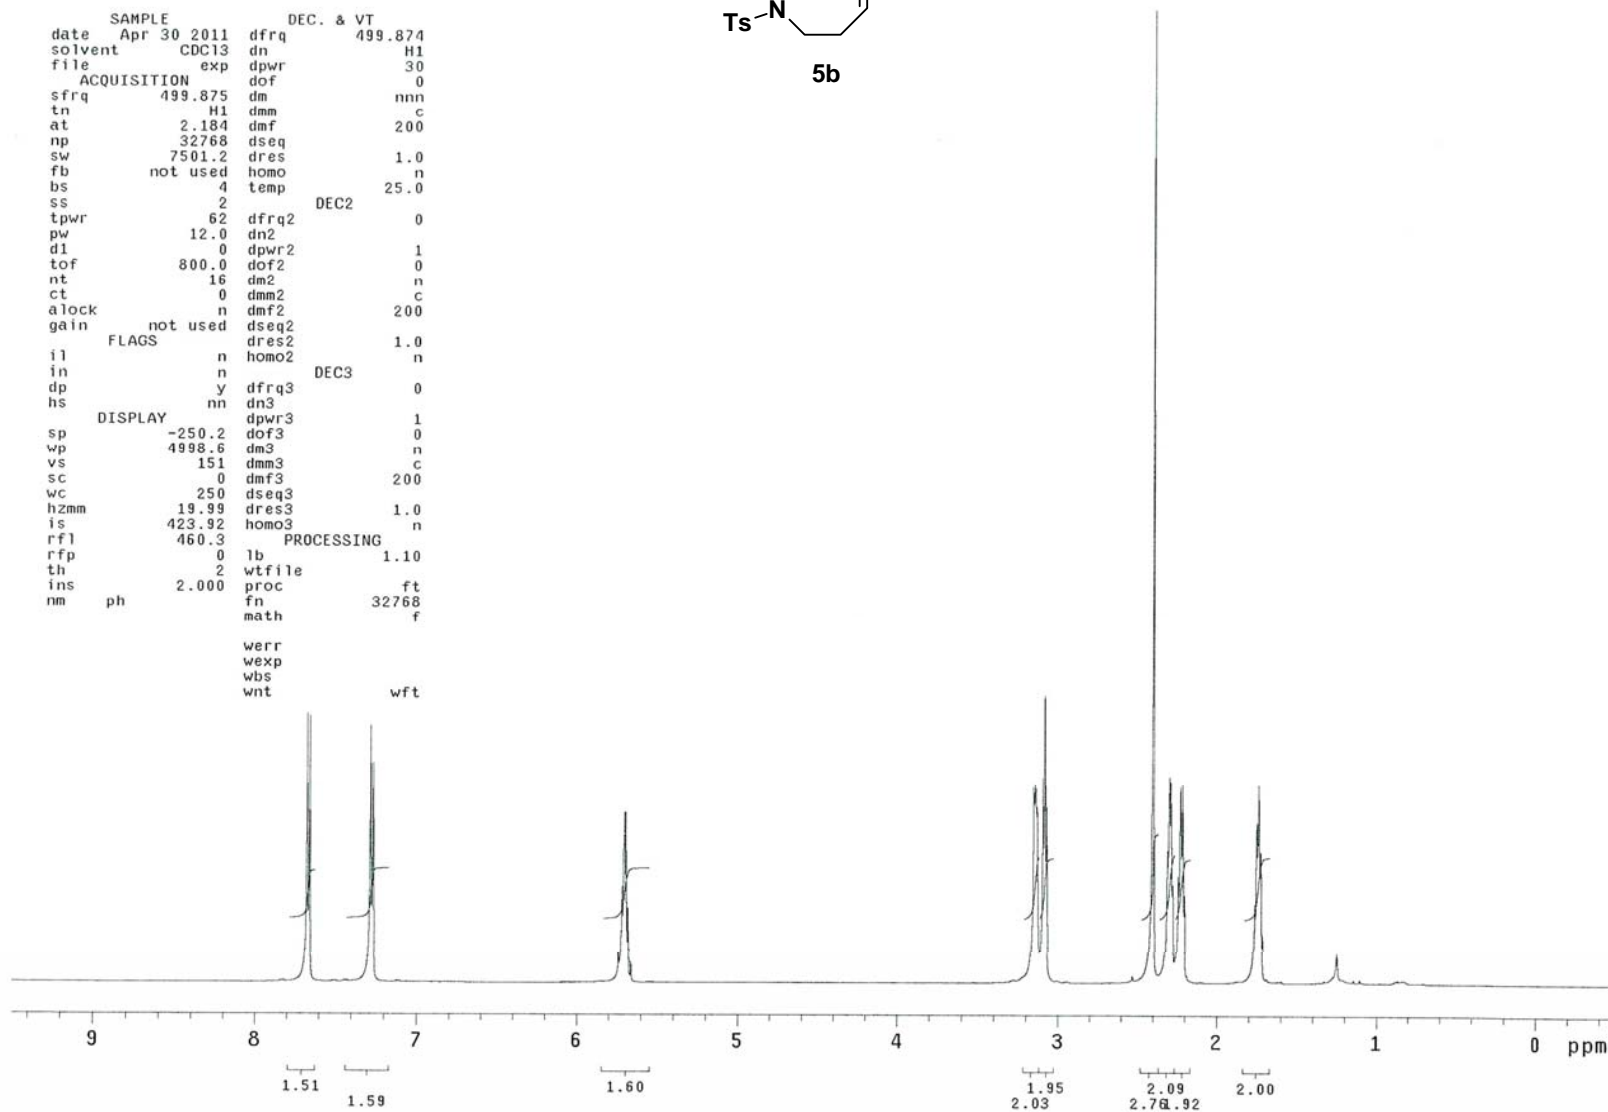

S87

WYKELN19022\_13C

exp2 s2pu1

```

SAMPLE          DEC. & VT
date  Apr 30 2011  dfrq  499.874
solvent  CDC13    dn     H1
file     exp      dpwr   48
ACQUISITION      dof    0
sfrq     125.707  dm     yyY
tn       C13     dmm     w
at       1.092   dmf     8929
np       65536   dseq
sw       29996.3 dres   1.0
fb       not used homo   n
bs       16     temp   25.0
tpwr     55
pw       4.8    dfrq2  0
d1       0     dn2
tof      2000.0 dpwr2   1
nt       9999  dof2    0
ct       0     dm2     n
a1ock   n      dmm2    c
gain    not used dmf2   10000
        FLAGS   dseq2
i1      n      dres2   1.0
in      n      homo2
dp      y
hs      nn     dfrq3  0
        DISPLAY dn3
sp      -1094.2 dpwr3   1
wp      29995.3 dof3    0
vs      50     dm3     n
sc      0     dmm3    c
wc      250   dmf3   10000
hzmm    119.98 dseq3
is      500.00 dres3   1.0
rf1     1095.1 homo3   n
rfp     0
th      6     lb     PROCESSING 1.00
ins     100.000 wtfile
nm  cdc ph   proc     ft
        fn     not used
        math    f
        werr
        wexp
        wbs
        wnt

```

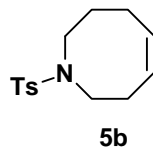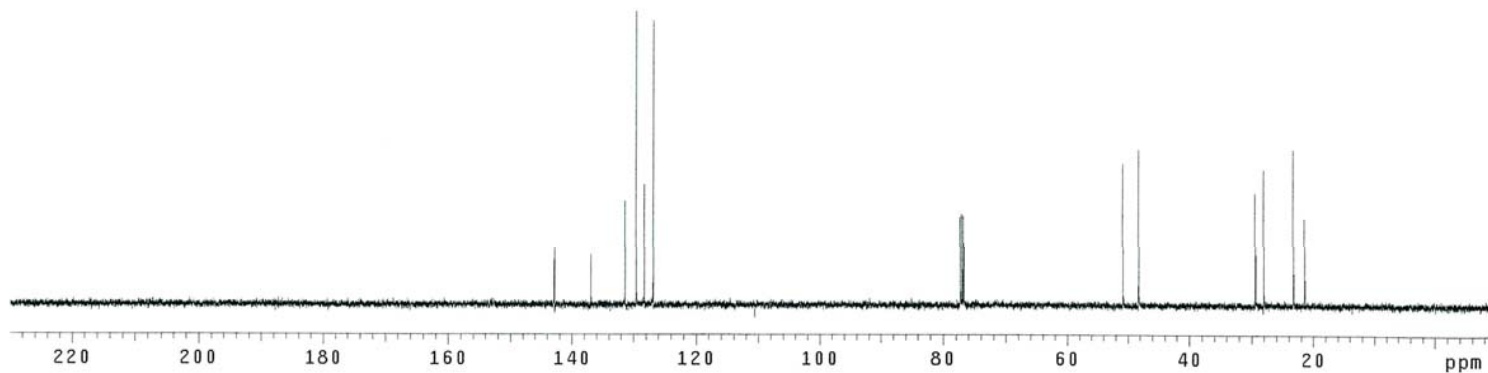



WYKELH8080\_1H

exp1 s2pul

```

SAMPLE
date Apr 24 2010 dfrq DEC. & VT 500.176
solvent CDC13 dn H1
file /export/home/~ dpwr 32
ds2/vnmrsys/data/i~ dof 0
500b/schreiber/WAN~ dm nnn
G/Pub1/WYKELH8080_~ dmm c
1H.fid dmf 8770
ACQUISITION
sfrq 500.176 dseq
tn H1 hmo 1.0
at 2.048 temp 25.0
np 32768 PROCESSING
sw 8000.0 lb 0.10
fb 4000 wtfile
bs 4 proc
ss 2 fn not used
tpwr 58 math
pw 5.0
d1 0 werr
tof 0 wexp
nt 32 wbs
ct 0 wnt wft
alock n
gain not used
FLAGS
il n
in n
dp y
hs nn
DISPLAY
sp -250.1
wp 5001.5
vs 96
sc 0
wc 250
h2mm 20.01
is 194.35
rf1 5130.9
rfp 3631.3
th 1
ins 2.000
nm ph
```

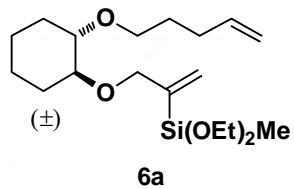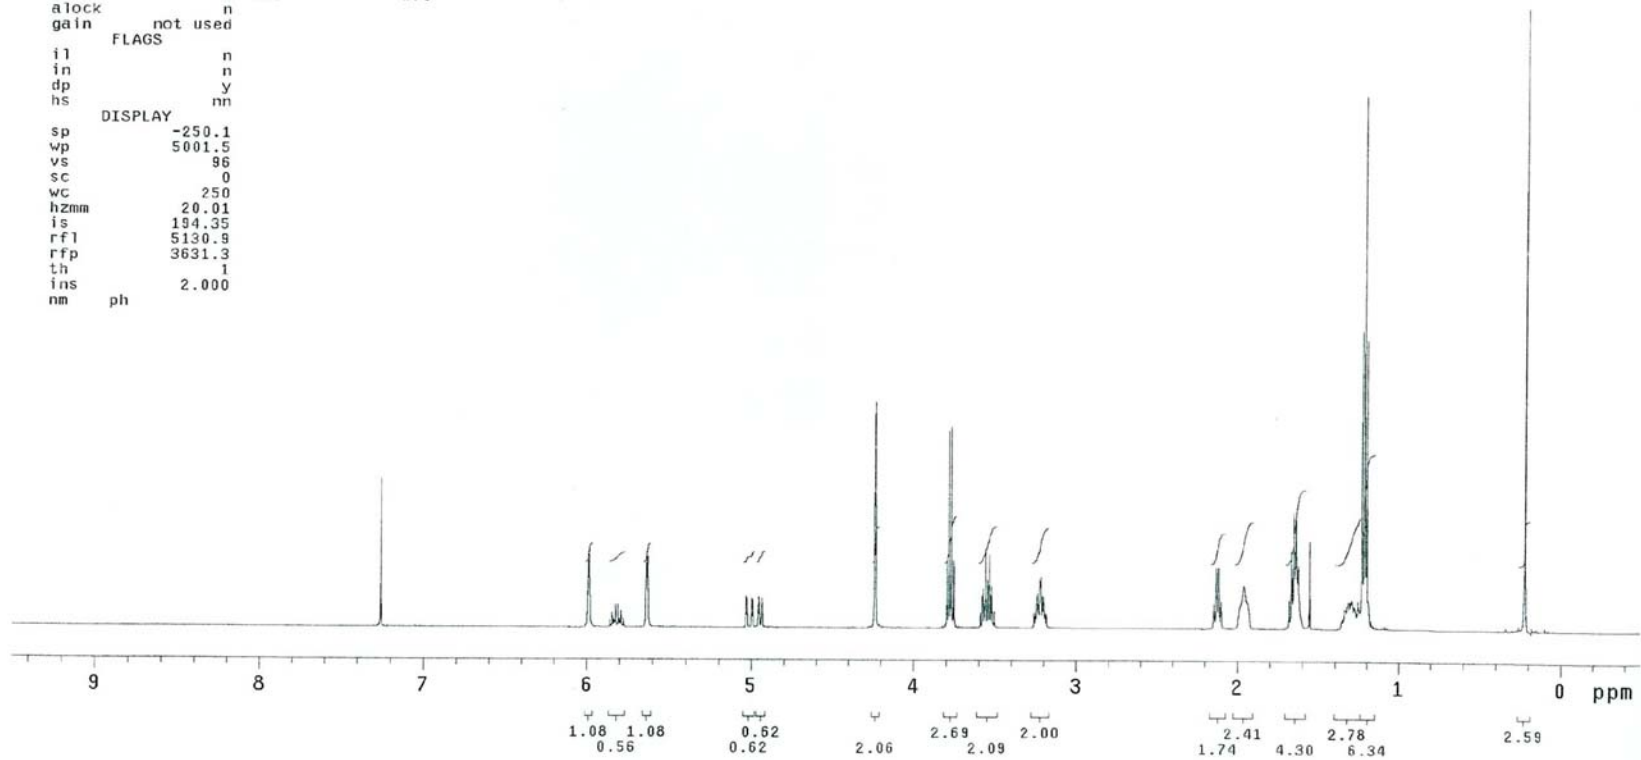

S89

WYKELN8080\_13C

exp2 s2pu1

```
SAMPLE          DEC. & VT
date Apr 25 2010 dfrq          499.874
solvent CDC13      dn          H1
file exp         dpwr         48
ACQUISITION    dof          0
sfrq 125.707     dm           YYY
tn C13          dmm           W
at 1.092        dmf          10000
np 65536        dseq
sw 29996.3      dres          1.0
fb not used     homo          n
bs 16          temp         25.0
tpwr 55        DEC2
pw 2.0         dfrq2         0
d1 0          dn2
tof 2000.0     dpwr2         1
nt 9999       dof2          0
ct 848        dm2           n
alock not used  dmm2          c
gain not used  dm2           10000
FLAGS
il n          dres2         1.0
ln n          homo2
dp y          DEC3
hs nn        dfrq3         0
DISPLAY
sp -1088.7     dn3           1
wp 29995.3    dpwr3         0
vs 42         dof3          n
sc 0          dm3           c
wc 250        dm3           10000
hzmm 119.98   dseq3
is 500.00     dres3         1.0
rfl 10768.0   homo3         n
rfp 9678.3    PROCESSING
th 3          lb           1.00
ins 100.000   wtfile
nm cdc ph     proc          ft
              fn          not used
              math         f
              werr
              wexp
              wbs
              wnt
```

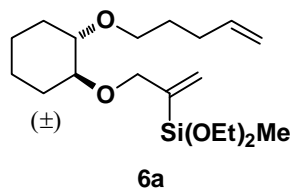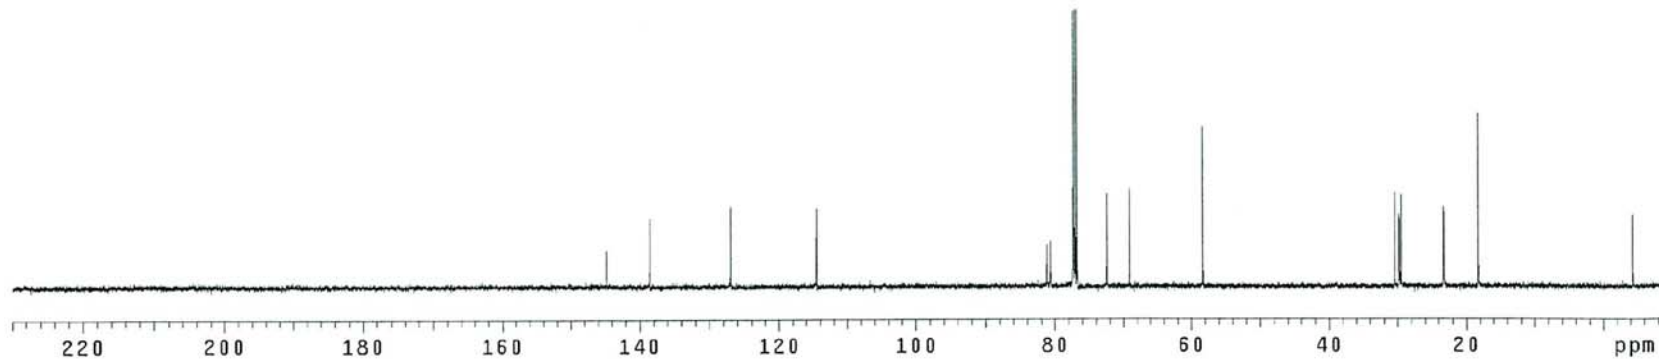

S90

WYKELN10023\_1H

exp1 s2pu1

```
SAMPLE          DEC. & VT
date Apr 26 2010 dfrq      499.874
solvent CDC13      dn       H1
file /export/home/~ dpwr     30
ds2/vnmrsys/data/i~ dof     0
500c/schreiber/WAN~ dm      nnn
G/Pub1/WYKELN10023~ dmm     c
_1H.fid         dmf     200
ACQUISITION
sfrq      499.875 dres     1.0
tn        H1      homo     n
at        2.184   temp    25.0
np        32768
sw        7501.2  lb       1.10
fb        not used
bs        4       proc     ft
ss        2       fn       32768
tpwr      62     math     f
pw        12.0
d1        0       werr
tof       800.0  wexp
nt        32     wbs
ct        32     wnt      wft
alock     not used
gain      not used
FLAGS
il        n
in        n
dp        y
hs        nn
DISPLAY
sp        -250.2
wp        4998.6
vs        126
sc        0
wc        250
hzmm     19.99
is        399.85
rf1      4090.3
rfp      3629.1
lh        1
ins      1.000
nm      ph
```

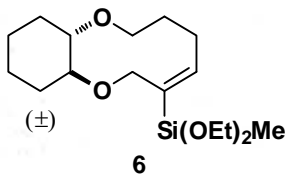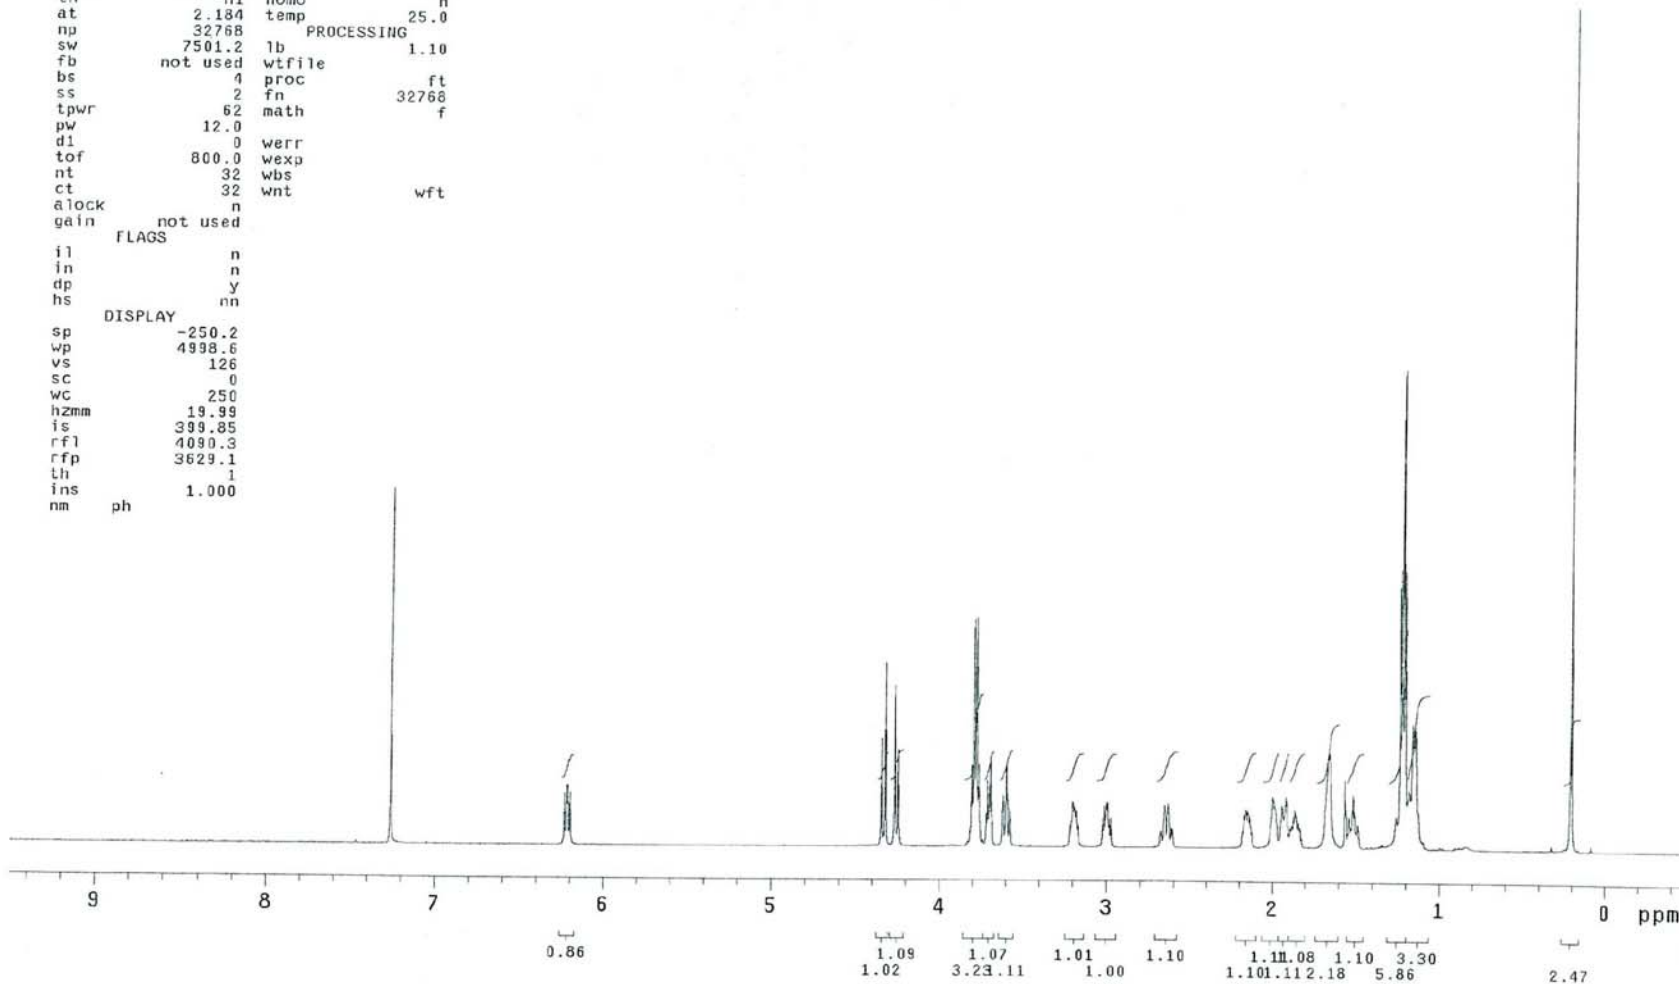

S91

WYKELN10023\_13C

exp1 s2pu1

| SAMPLE      |             | DEC. & VT  |          |
|-------------|-------------|------------|----------|
| date        | Apr 26 2010 | dfrq       | 499.874  |
| solvent     | CDC13       | dn         | H1       |
| file        | exp         | dpwr       | 48       |
| ACQUISITION |             | dof        | 0        |
| sfrq        | 125.707     | dm         | yyy      |
| tn          | C13         | dmm        | w        |
| at          | 1.092       | dmf        | 10000    |
| np          | 65536       | dseq       |          |
| sw          | 29996.3     | dres       | 1.0      |
| fb          | not used    | homo       | n        |
| bs          | 32          | temp       | 25.0     |
| tpwr        | 55          | DEC2       |          |
| pw          | 4.2         | dfrq2      | 0        |
| d1          | 0           | dn2        |          |
| tof         | 2000.0      | dpwr2      | 1        |
| nt          | 99999       | dof2       | 0        |
| ct          | 1248        | dm2        | n        |
| alock       | n           | dmm2       | c        |
| gain        | not used    | dmf2       | 10000    |
| FLAGS       |             | dseq2      |          |
| l1          | n           | dres2      | 1.0      |
| in          | n           | homo2      | n        |
| dp          | y           | DEC3       |          |
| hs          | nn          | dfrq3      | 0        |
| DISPLAY     |             | dn3        |          |
| sp          | -1086.9     | dpwr3      | 1        |
| wp          | 29995.3     | dof3       | 0        |
| vs          | 35          | dm3        | n        |
| sc          | 0           | dmm3       | c        |
| wc          | 250         | dmf3       | 10000    |
| hzmm        | 119.98      | dseq3      |          |
| is          | 500.00      | dres3      | 1.0      |
| rf1         | 10766.2     | homo3      | n        |
| rfp         | 9678.3      | PROCESSING |          |
| th          | 3           | lb         | 1.00     |
| ins         | 100.000     | wfile      |          |
| nm          | cdc ph      | proc       | ft       |
|             |             | fn         | not used |
|             |             | math       | f        |
|             |             | werr       |          |
|             |             | wexp       |          |
|             |             | wbs        |          |
|             |             | wnt        |          |

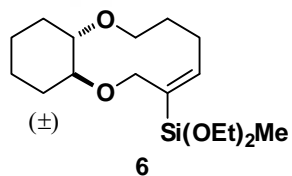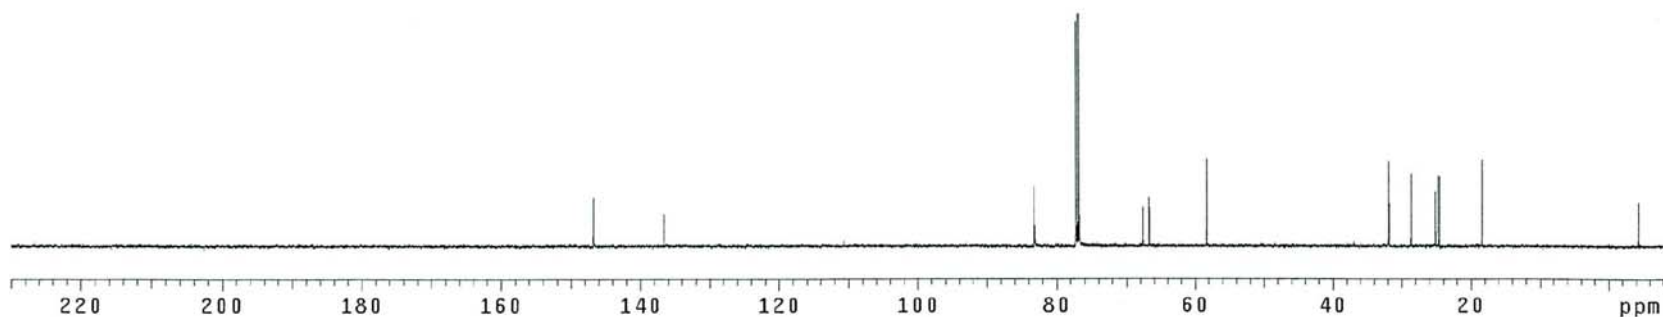

S92

WYKELN19023\_1H

expl s2pu1

| SAMPLE      |             | DEC. & VT  |         |
|-------------|-------------|------------|---------|
| date        | Apr 30 2011 | dfrq       | 499.874 |
| solvent     | CDC13       | dn         | H1      |
| file        | exp         | dpwr       | 30      |
| ACQUISITION |             | dof        |         |
| sfrq        | 499.875     | dm         | nnn     |
| tn          | H1          | dmm        | c       |
| at          | 2.184       | dmf        | 200     |
| np          | 32768       | dseq       |         |
| sw          | 7501.2      | dres       | 1.0     |
| fb          | not used    | homo       | n       |
| bs          | 4           | temp       | 25.0    |
| ss          | 2           | DEC2       |         |
| tpwr        | 62          | dfrq2      | 0       |
| pw          | 12.0        | dn2        |         |
| d1          | 0           | dpwr2      | 1       |
| tof         | 800.0       | dof2       | 0       |
| nt          | 16          | dm2        | n       |
| ct          | 0           | dmm2       | c       |
| alock       | n           | dmf2       | 200     |
| gain        | not used    | dseq2      |         |
| FLAGS       |             | dres2      | 1.0     |
| il          | n           | homo2      | n       |
| in          | n           | DEC3       |         |
| dp          | y           | dfrq3      | 0       |
| hs          | nn          | dn3        |         |
| DISPLAY     |             | PROCESSING |         |
| sp          | -250.2      | dpwr3      | 1       |
| wp          | 4998.6      | dof3       | 0       |
| vs          | 151         | dm3        | n       |
| sc          | 0           | dmm3       | c       |
| wc          | 250         | dmf3       | 200     |
| hzmm        | 19.99       | dseq3      |         |
| is          | 204.99      | dres3      | 1.0     |
| rf1         | 4089.8      | homo3      | n       |
| rpf         | 3629.1      | lb         | 1.10    |
| th          | 3           | wf1file    |         |
| ins         | 1.000       | proc       | ft      |
| nm          | ph          | fn         | 32768   |
|             |             | math       | f       |
|             |             | werr       |         |
|             |             | wexp       |         |
|             |             | wbs        |         |
|             |             | wnt        | wft     |

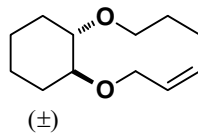

6b

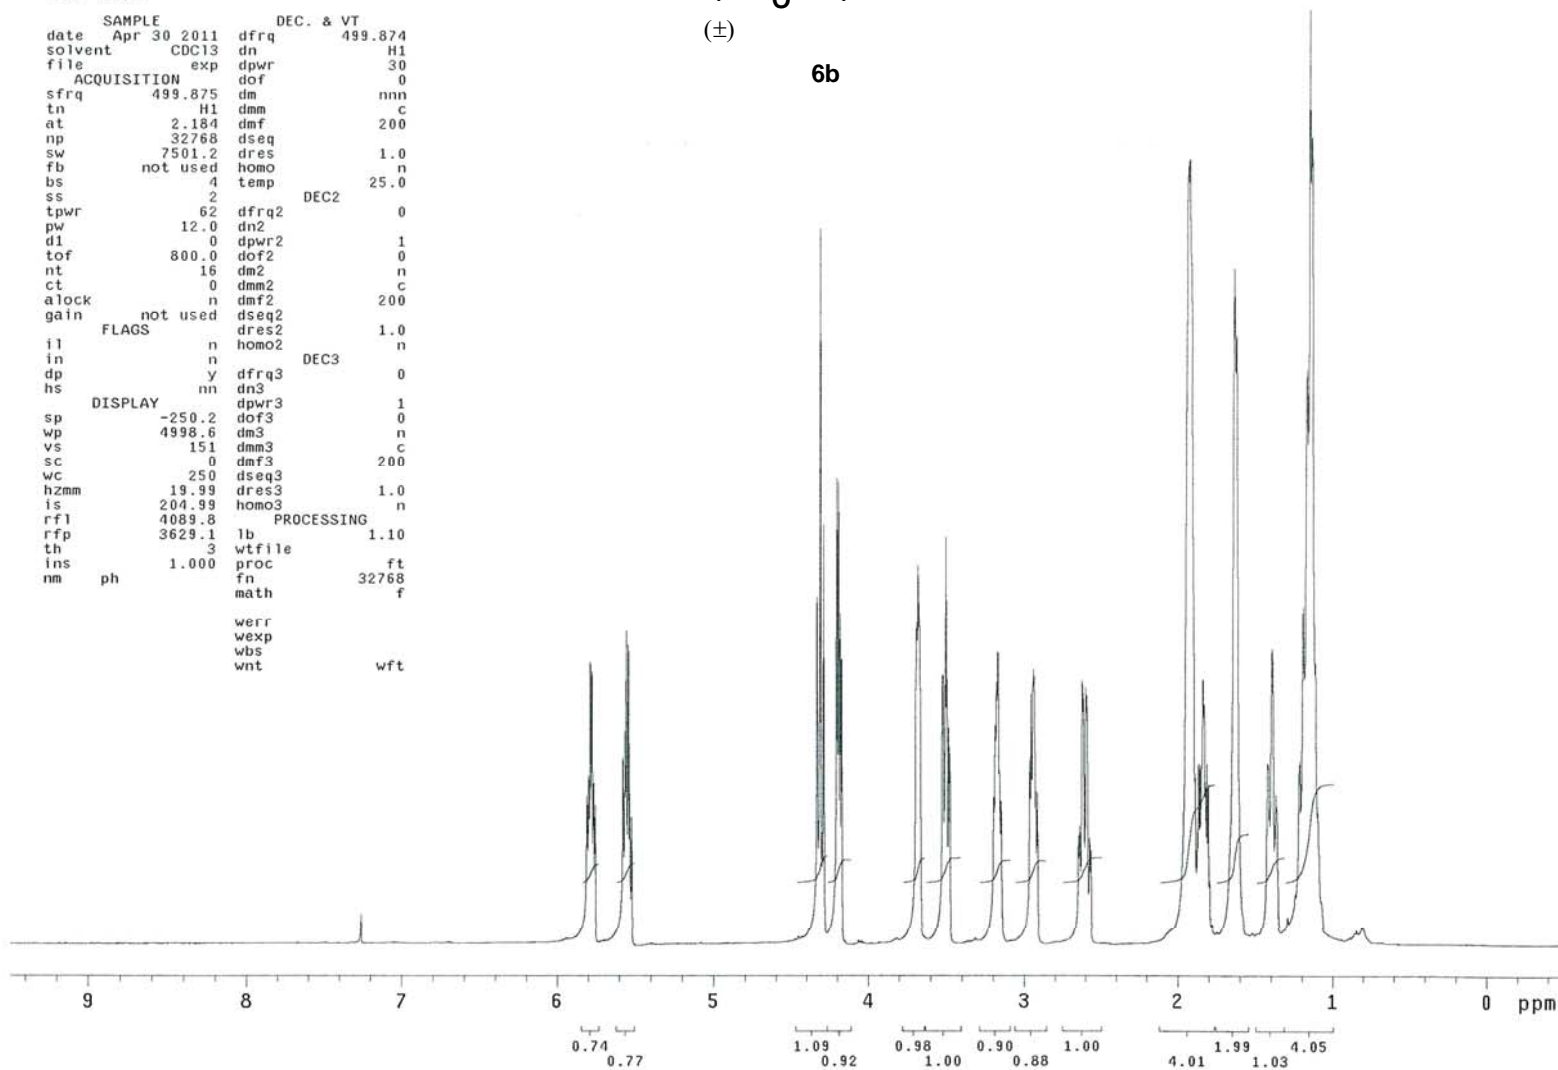

WYKELN19023\_13C

exp2 s2pu1

| SAMPLE      |             | DEC. & VT  |          |
|-------------|-------------|------------|----------|
| date        | Apr 30 2011 | dfrq       | 499.874  |
| solvent     | CDC13       | dn         | H1       |
| file        | exp         | dpwr       | 48       |
| ACQUISITION |             | dof        | 0        |
| sfrq        | 125.707     | dm         | yyy      |
| tn          | C13         | dmm        | w        |
| at          | 1.092       | dmf        | 8929     |
| np          | 65536       | dseq       |          |
| sw          | 29996.3     | dres       | 1.0      |
| fb          | not used    | homo       | n        |
| bs          | 16          | temp       | 25.0     |
| tpwr        | 55          | DEC2       |          |
| pw          | 4.8         | dfrq2      | 0        |
| d1          | 0           | dn2        |          |
| tof         | 2000.0      | dpwr2      | 1        |
| nt          | 9999        | dof2       | 0        |
| ct          | 0           | dm2        | n        |
| alock       | n           | dmm2       | c        |
| gain        | not used    | dmf2       | 10000    |
| FLAGS       |             | dseq2      |          |
| il          | n           | dres2      | 1.0      |
| in          | n           | homo2      | n        |
| dp          | y           | DEC3       |          |
| hs          | nn          | dfrq3      | 0        |
| DISPLAY     |             | dn3        |          |
| sp          | -1093.3     | dpwr3      | 1        |
| wp          | 29995.3     | dof3       | 0        |
| vs          | 50          | dm3        | n        |
| sc          | 0           | dmm3       | c        |
| wc          | 250         | dmf3       | 10000    |
| hzmm        | 119.98      | dseq3      |          |
| is          | 500.00      | dres3      | 1.0      |
| rfl         | 10772.6     | homo3      | n        |
| rffp        | 9678.3      | PROCESSING |          |
| th          | 6           | lb         | 1.00     |
| ins         | 100.000     | wfile      |          |
| nm          | cdc ph      | proc       | ft       |
|             |             | fn         | not used |
|             |             | math       | f        |
|             |             | werr       |          |
|             |             | wexp       |          |
|             |             | wbs        |          |
|             |             | wnt        |          |

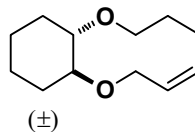

6b

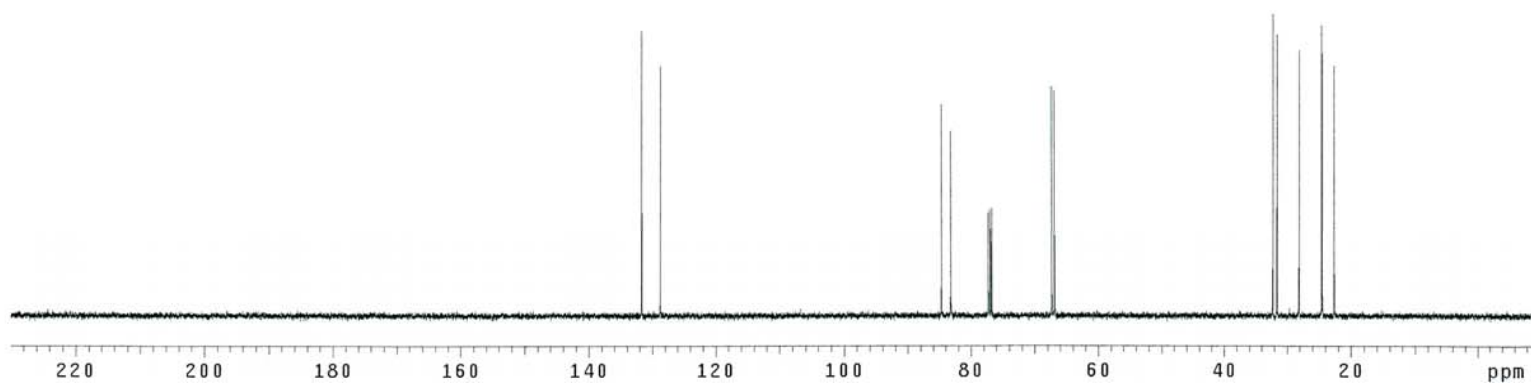

WYKELN8081\_1H

exp1 s2pu1

```
SAMPLE          DEC. & VT
date   Apr 24 2010  dfrq   500.176
solvent CDC13      dn      H1
file   /export/home/~ dpwr   32
ds2/vnmrSYS/data/1~ dof    0
500b/schreiber/WAN~ dm     nnn
G/Pub1/WYKELN8081_~ dmm    c
1H.fid  dmf      8770

ACQUISITION
sfrq   500.176  dres    1.0
tn     H1      homo    n
at     2.048   temp    25.0
np     32768   PROCESSING
sw     8000.0  lb      0.10
fb     4000    wtfile
bs     4       proc    ft
ss     2       fn      not used
tpwr   58     math    f
pw     5.0
d1     0       werr
tof    0       wexp
nt     32     wbs
ct     0       wnt
alock  n
gain   not used

FLAGS
il     n
in     n
dp     y
hs     nn

DISPLAY
sp     -249.6
wp     5001.5
vs     151
sc     0
wc     250
hzmm   20.01
is     177.03
rfl    5130.9
rfp    3631.3
th     3
ins    2.000
nm     ph
```

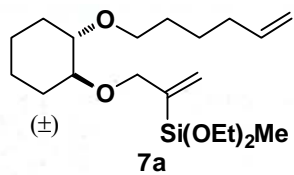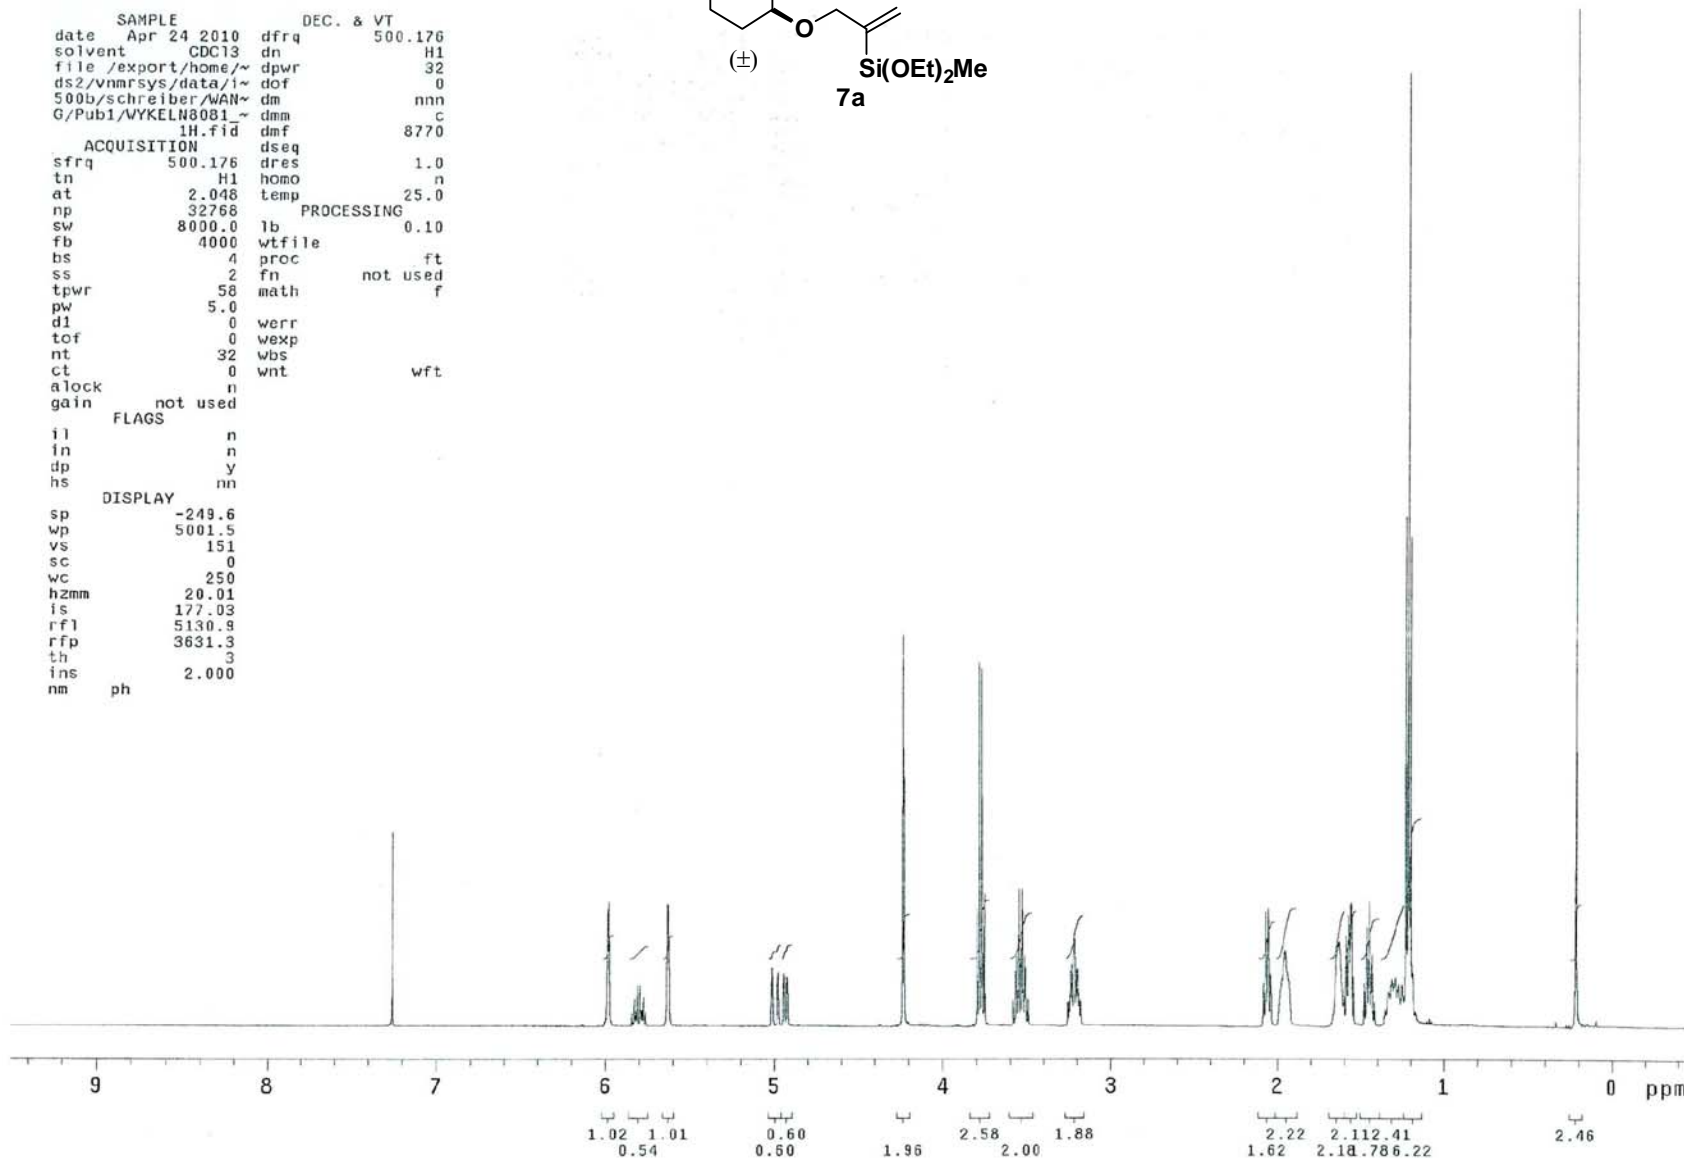

S95

WYKELN8081\_13C

exp2 s2pu1

| SAMPLE      |             | DEC. & VT  |          |
|-------------|-------------|------------|----------|
| date        | Apr 25 2010 | dfrq       | 499.874  |
| solvent     | CDCl3       | dn         | H1       |
| file        | exp         | dpwr       | 48       |
| ACQUISITION |             |            |          |
| sfrq        | 125.707     | dm         | yyy      |
| tn          | C13         | dmm        | w        |
| at          | 1.092       | dmf        | 10000    |
| np          | 65536       | dseq       |          |
| sw          | 29996.3     | dres       | 1.0      |
| fb          | not used    | homo       | n        |
| bs          | 16          | temp       | 25.0     |
| tpwr        | 55          | DEC2       |          |
| pw          | 2.0         | dfrq2      | 0        |
| d1          | 0           | dn2        |          |
| tof         | 2000.0      | dpwr2      | 1        |
| nt          | 9999        | dof2       | 0        |
| ct          | 1520        | dm2        | n        |
| alock       | not used    | dmm2       | c        |
| gain        | not used    | dmf2       | 10000    |
| FLAGS       |             |            |          |
| il          | n           | dres2      | 1.0      |
| in          | n           | homo2      | n        |
| dp          | y           | DEC3       |          |
| hs          | nn          | dfrq3      | 0        |
| DISPLAY     |             |            |          |
| sp          | -1087.8     | dn3        |          |
| wp          | 29995.3     | dpwr3      | 1        |
| vs          | 57          | dof3       | 0        |
| sc          | 0           | dm3        | n        |
| wc          | 250         | dmm3       | c        |
| hzmm        | 119.98      | dmf3       | 10000    |
| is          | 500.00      | dseq3      |          |
| rfl         | 1088.7      | dres3      | 1.0      |
| rfp         | 0           | homo3      | n        |
| th          | 3           | PROCESSING |          |
| ins         | 100.000     | lb         | 1.00     |
| nm          | cdc ph      | wtfile     |          |
|             |             | proc       | ft       |
|             |             | fn         | not used |
|             |             | math       | f        |
|             |             | werr       |          |
|             |             | wexp       |          |
|             |             | wbs        |          |
|             |             | wnt        |          |

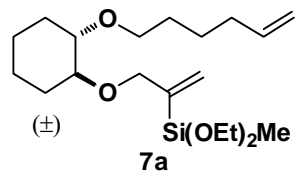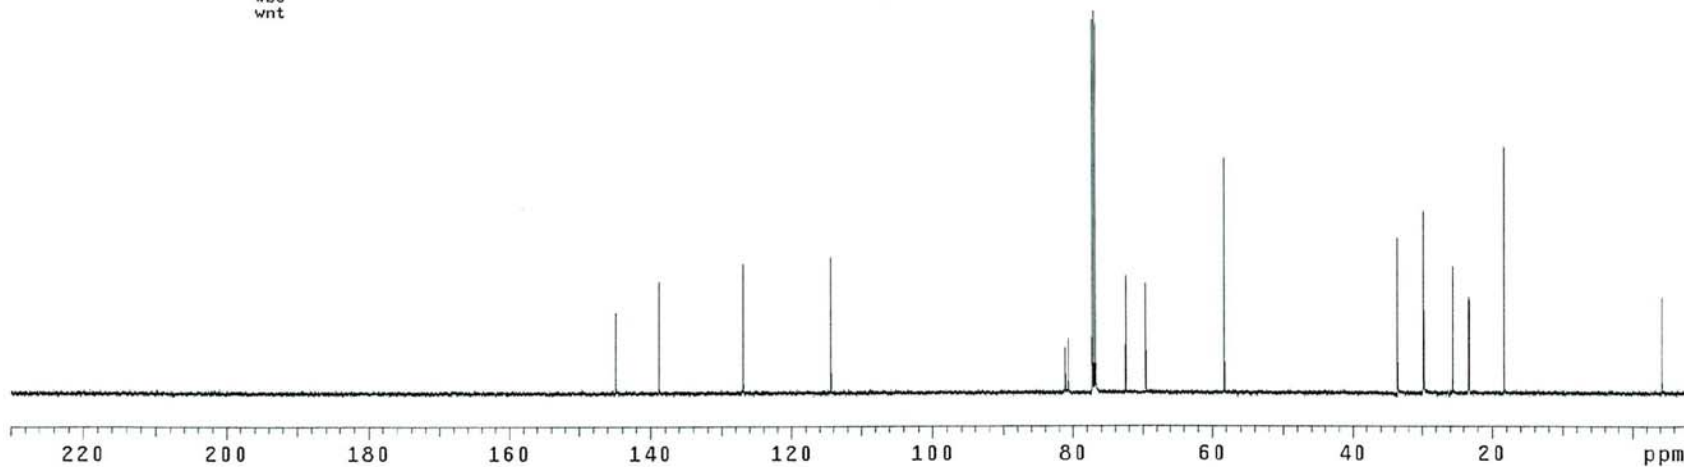

S96



WYKELN10024\_1H

exp1 s2pu1

```

SAMPLE
date Apr 26 2010 dfrq DEC. & VT 499.874
solvent CDC13 dn H1
file /export/home/~ dpwr 30
ds2/vnmr/sys/data/i~ dof 0
500c/schreiber/WAN~ dm nnn
G/Pub1/WYKELN10024~ dmm C
1H.fid dmf 200
ACQUISITION
sfrq 499.875 dres 1.0
tn H1 hcmo n
at 2.184 temp 25.0
np 32768
sw 7501.2 lb 1.10
fb not used wfile
bs 4 proc ft
ss 2 fn 32768
tpwr 62 math f
pw 12.0
d1 0 werr
tof 800.0 wexp
nt 32 wbs
ct 32 wnt wft
alock n
gain not used
FLAGS
il n
in n
dp y
hs nn
DISPLAY
sp -250.2
wp 4998.6
vs 117
sc 0
wc 250
hzmm 19.99
is 384.92
rf1 4090.6
rfp 3629.1
th 2
ins 1.000
nm ph
```

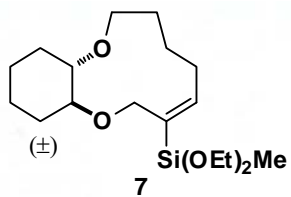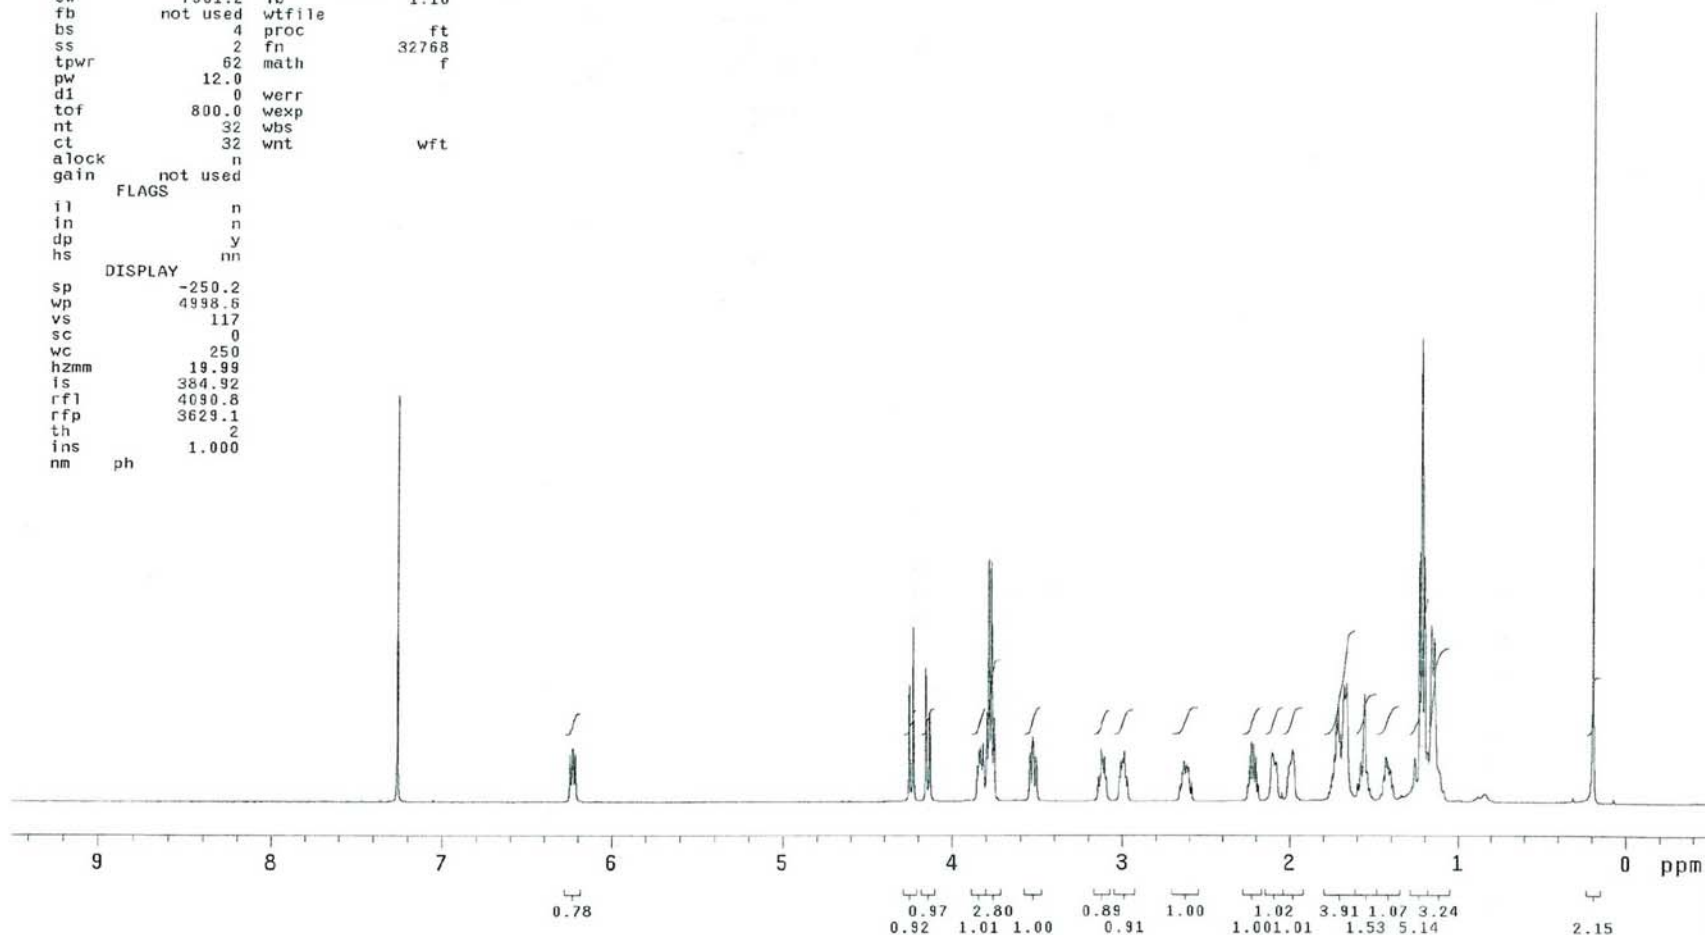

S97

WYKELN10024\_13C

exp1 s2pu1

| SAMPLE      |             | DEC. & VT  |          |
|-------------|-------------|------------|----------|
| date        | Apr 26 2010 | dfrq       | 499.874  |
| solvent     | CDC13       | dn         | H1       |
| file        | exp         | dpwr       | 48       |
| ACQUISITION |             |            |          |
| sfrq        | 125.707     | dm         | yy       |
| tn          | C13         | dmm        | w        |
| at          | 1.092       | dmf        | 10000    |
| np          | 65536       | dseq       |          |
| sw          | 29996.3     | dres       | 1.0      |
| fb          | not used    | homo       | n        |
| bs          | 32          | temp       | 25.0     |
| tpwr        | 55          | DEC2       |          |
| pw          | 4.2         | dfrq2      | 0        |
| d1          | 0           | dn2        |          |
| tof         | 2000.0      | dpwr2      | 1        |
| nt          | 99999       | dof2       | 0        |
| ct          | 1792        | dm2        | n        |
| alock       | n           | dmm2       | c        |
| gain        | not used    | dmf2       | 10000    |
| FLAGS       |             |            |          |
| il          | n           | dseq2      | 1.0      |
| in          | n           | dres2      | n        |
| dp          | y           | homo2      | DEC3     |
| hs          | nn          | dfrq3      | 0        |
| DISPLAY     |             |            |          |
| sp          | -1086.9     | dn3        |          |
| wp          | 29995.3     | dpwr3      | 1        |
| vs          | 27          | dof3       | 0        |
| sc          | 0           | dm3        | n        |
| wc          | 250         | dmm3       | c        |
| hzmm        | 119.98      | dmf3       | 10000    |
| is          | 500.00      | dseq3      |          |
| rfl         | 10766.2     | dres3      | 1.0      |
| rffp        | 9678.3      | homo3      | n        |
| th          | 2           | PROCESSING |          |
| ins         | 100.000     | lb         | 1.00     |
| nm          | cdc ph      | wtfile     | t        |
|             |             | proc       | ft       |
|             |             | fn         | not used |
|             |             | math       | f        |
|             |             | werr       |          |
|             |             | wexp       |          |
|             |             | wbs        |          |
|             |             | wnt        |          |

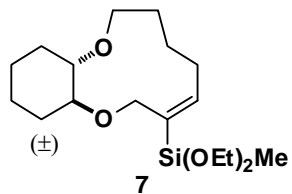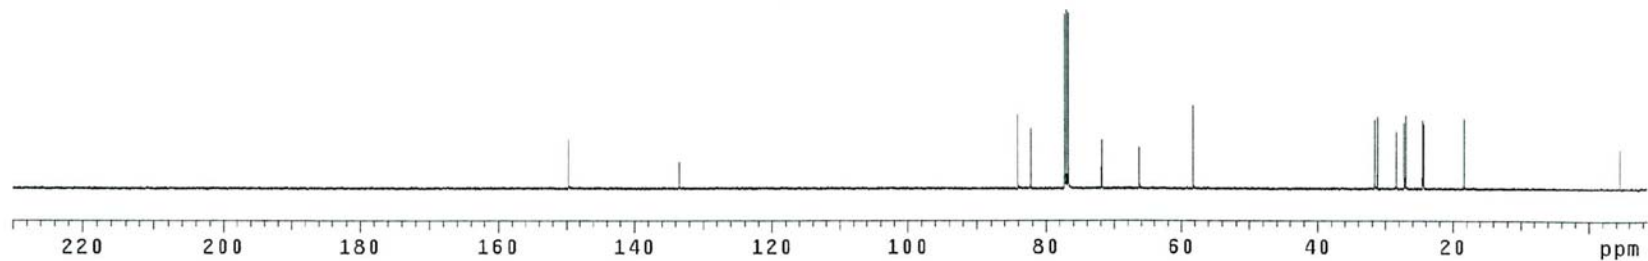

WYKELN19024\_1H

exp3 s2pu1

```
SAMPLE          DEC. & VT
date    Apr 30 2011  dfrq      499.874
solvent  CDC13      dn        H1
file    /export/home/~  dpwr      30
ds2/vnmrsys/data/~  dof        0
500c/schreiber/WAN~  dm         nnn
G/Pub1/WYKELN19024~  dmm        c
1H.fid  dmf        200

ACQUISITION
sfrq    499.875  dres      1.0
tn      H1      homo      n
at      2.184   temp     25.0
np      32768
sw      7501.2  lb        1.10
fb      not used  wtfile
bs      4       proc      ft
ss      2       fn        32768
tpwr    62      math      f
pw      12.0
d1      0       werr
tof     800.0  wexp
nt      16     wbs
ct      0     wnt      wft
alock   n
gain    not used

FLAGS
il      n
in      n
dp      y
hs      nn

DISPLAY
sp      -250.2
wp      4998.6
vs      57
sc      0
wc      250
hzmm    19.99
is      198.78
rfl     460.8
rfp     0
th      4
ins     1.000
nm      ph
```

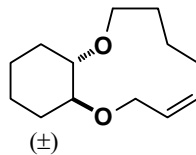

7b

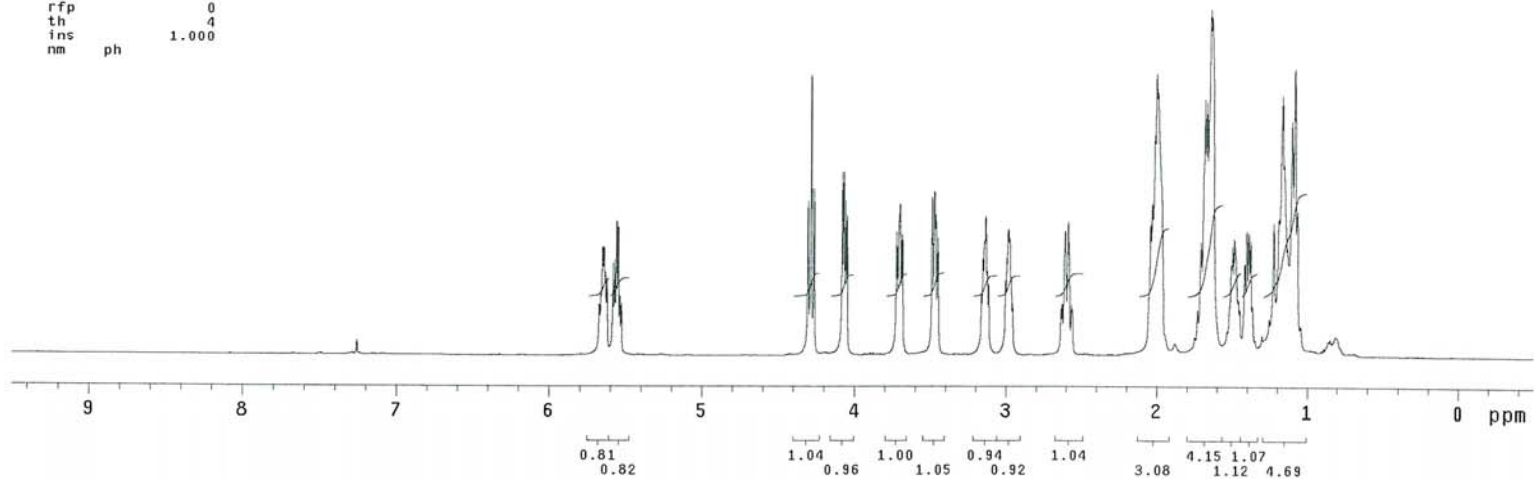

WYKELN19024\_13C

exp3 s2pu1

```
SAMPLE          DEC. & VT
date Apr 30 2011 dfrq      499.874
solvent CDC13     dn       H1
file /export/home/~ dpwr    48
ds2/vnmrsys/data/i~ dof     0
500c/schreiber/WAN~ dm      yyY
G/Pub1/WYKELN19024~ dmm     w
_13C.fid         dmf      8929
ACQUISITION     dseq
sfrq 125.707     dres    1.0
in C13          homo    n
at 1.092        temp    25.0
np 65536        PROCESSING
sw 29996.3      lb      1.00
fb not used     wtfile
bs 16          PROC    ft
tpwr 55        fn      not used
pw 4.8        math    f
d1 0
tof 2000.0     werr
nt 9999       wexp
ct 0          wbs
alock n        wnt
gain not used
FLAGS
il n
in n
dp y
hs nn
DISPLAY
sp -1092.4
wp 29995.3
vs 50
sc 0
wc 250
hzmm 119.98
is 500.00
rfl 10771.7
rfp 9678.3
th 9
ins 100.000
nm cdc ph
```

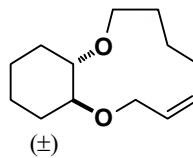

7b

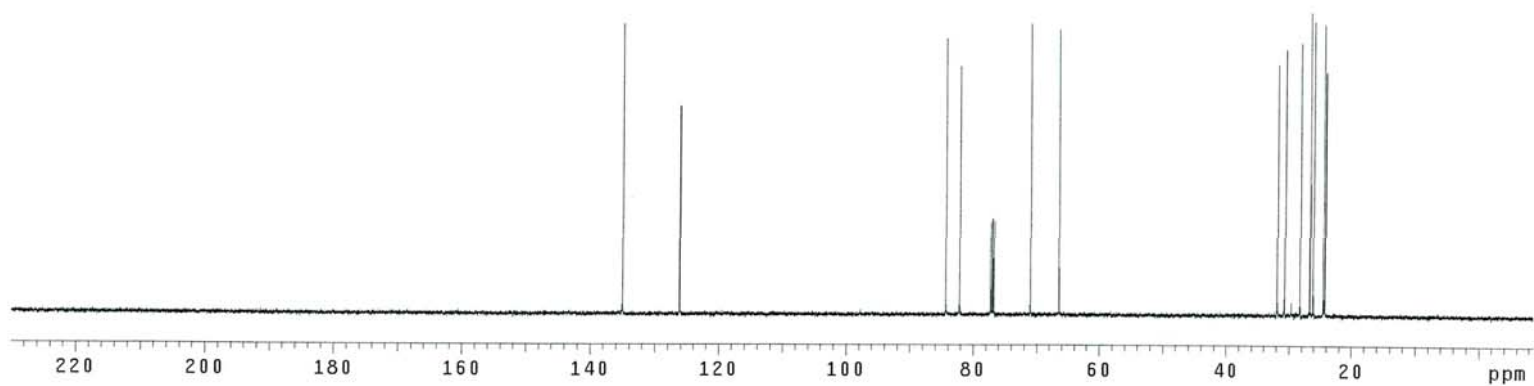

S100

WYKELN8085\_1H

exp1 s2pu1

```
SAMPLE          DEC. & VT
date Apr 28 2010 dfrq      499.874
solvent CDC13      dn       H1
file /export/home/~ dpwr    30
ds2/vnmrsys/data/i~ dof     0
500C/schreiber/WAN~ dm      nnn
G/Pub1/WYKELN8085_~ dmm     C
1H.fid          dmf      200
ACQUISITION     dseq
sfrq      499.875 dres    1.0
tn         H1      homo    n
at         2.184   temp    25.0
np         32768
sw         7501.2   lb      1.10
fb         not used wtfile
bs         4       proc     ft
ss         2       fn      32768
tpwr       62     math     f
pw         12.0
d1         0       werr
tof        800.0  wexp
nt         32     wbs
ct         32     wnt
aLOCK      n
gain       not used
FLAGS
il         n
in         n
dp         y
hs         nn
DISPLAY
sp        -250.2
wp        4998.6
vs         151
sc         0
wc         250
hzmm      19.99
is         848.42
rf1       4090.8
rfp       3629.1
th         7
ins       1.000
nm        ph
```

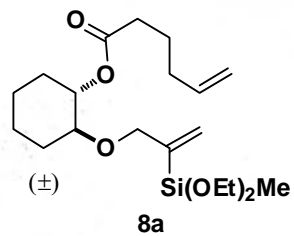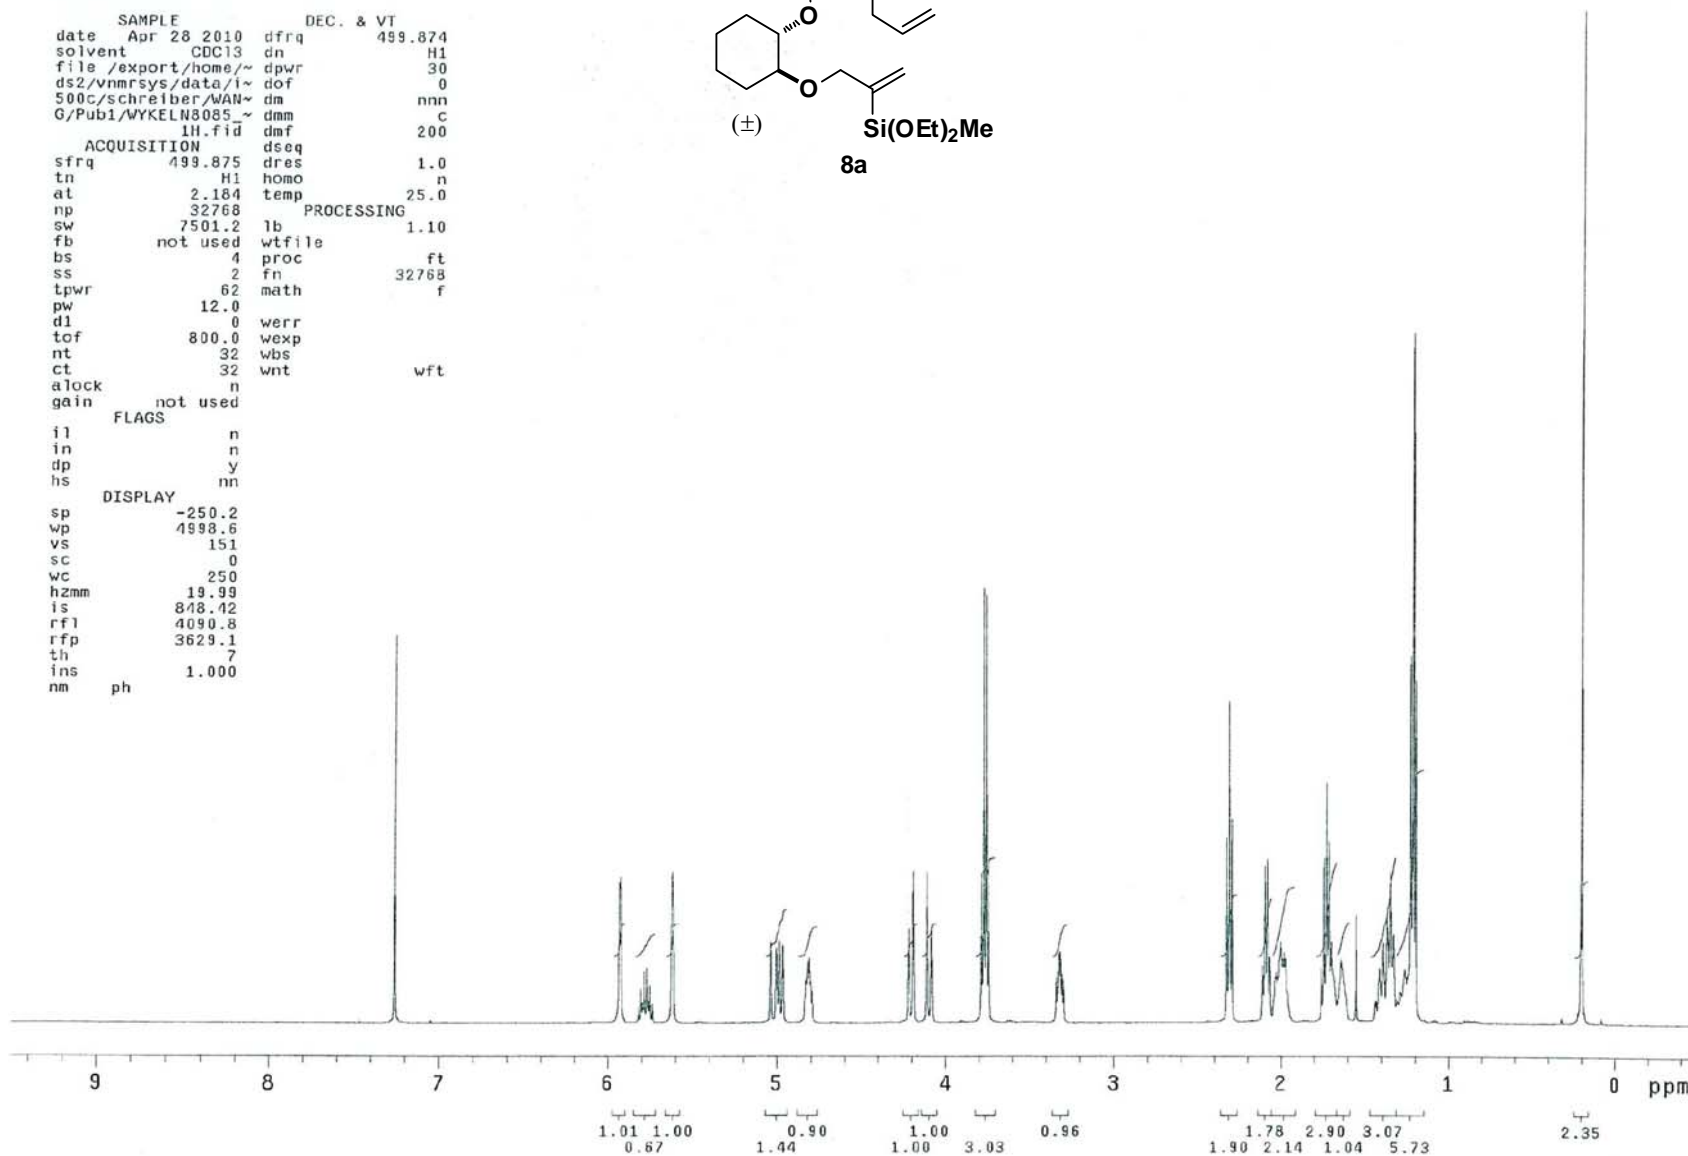

S101

WYKELN8085\_13C

exp3 s2pu1

| SAMPLE      |             | DEC. & VT |          |
|-------------|-------------|-----------|----------|
| date        | Apr 28 2010 | dfrq      | 499.874  |
| solvent     | CDC13       | dn        | H1       |
| file        | exp         | dpwr      | 48       |
| ACQUISITION |             |           |          |
| sfrq        | 125.707     | dm        | yyy      |
| tn          | C13         | dmm       | w        |
| at          | 1.092       | dmf       | 10000    |
| np          | 65536       | dseq      |          |
| sw          | 29996.3     | dres      | 1.0      |
| fb          | not used    | homo      | n        |
| bs          | 32          | temp      | 25.0     |
| tpwr        | 55          | DEC2      |          |
| pw          | 4.2         | dfrq2     | 0        |
| d1          | 0           | dn2       |          |
| tof         | 2000.0      | dpwr2     | 1        |
| nt          | 99999       | dof2      | 0        |
| ct          | 1024        | dm2       | n        |
| alock       | not used    | dmm2      | c        |
| gain        | not used    | dmf2      | 10000    |
| FLAGS       |             |           |          |
| il          | n           | dseq2     |          |
| in          | n           | dres2     | 1.0      |
| dp          | y           | homo2     | n        |
| hs          | nn          | DEC3      |          |
| DISPLAY     |             |           |          |
| sp          | -1087.8     | dfrq3     | 0        |
| wp          | 29995.3     | dn3       |          |
| vs          | 21          | dpwr3     | 1        |
| sc          | 0           | dof3      | 0        |
| wc          | 250         | dm3       | n        |
| h2mm        | 119.98      | dmm3      | c        |
| ls          | 500.00      | dmf3      | 10000    |
| rfl         | 10767.1     | dseq3     |          |
| rfp         | 9678.3      | dres3     | 1.0      |
| th          | 3           | homo3     | n        |
| PROCESSING  |             |           |          |
| ins         | 100.000     | lb        | 1.00     |
| nm          | cdc ph      | wtfile    |          |
|             |             | proc      | ft       |
|             |             | fn        | not used |
|             |             | math      | f        |
|             |             | werr      |          |
|             |             | wexp      |          |
|             |             | wbs       |          |
|             |             | wnt       |          |

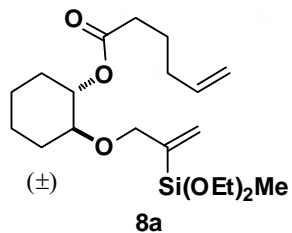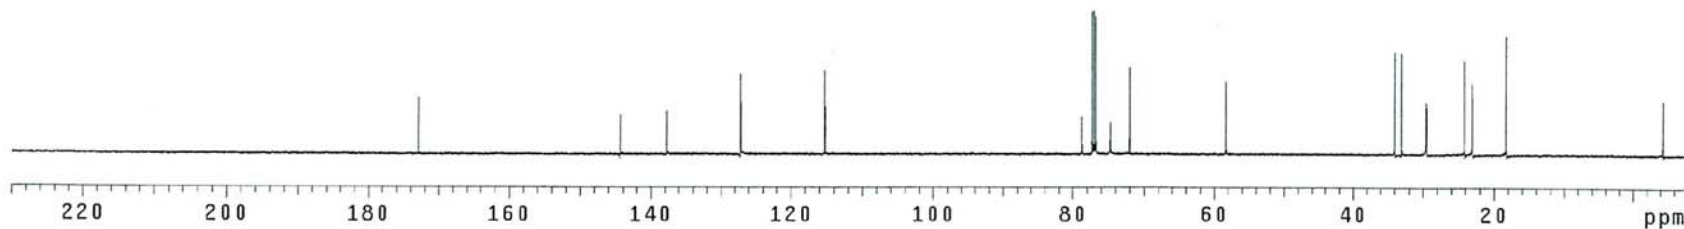

S102

WYKELN10028\_1H

exp1 s2pu1

```
SAMPLE          DEC. & VT
date Apr 28 2010 dfrq      499.874
solvent CDC13      dn       H1
file /export/home/~ dpwr     30
ds2/vnmrSYS/data/i~ dof     0
500c/schreiber/WAN~ dm      nnn
G/Pub1/WYKELN10028~ dmm     c
1H.fid          dmf      200

ACQUISITION
sfrq      499.875 dseq     1.0
tn        H1      homo     n
at        2.184  temp    25.0
np        32768
sw        7501.2 lb       1.10
fb        not used wtfile
bs        4       PROC     ft
ss        2       fn       32768
tpwr      62     math     f
pw        12.0
d1        0       werr
tof       800.0  wexp
nt        32     wbs
ct        32     wnt
alock     n
gain      not used

FLAGS
il        n
in        n
dp        y
hs        nn

DISPLAY
sp        -250.2
wp        4998.6
vs        113
sc        0
wc        250
hZmm     19.99
is       412.87
rf1      4090.3
rfp      3629.1
ch        4
ins      1.000
nm        ph
```

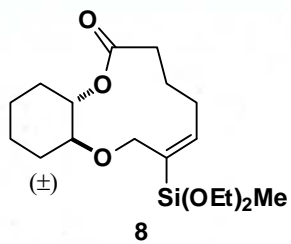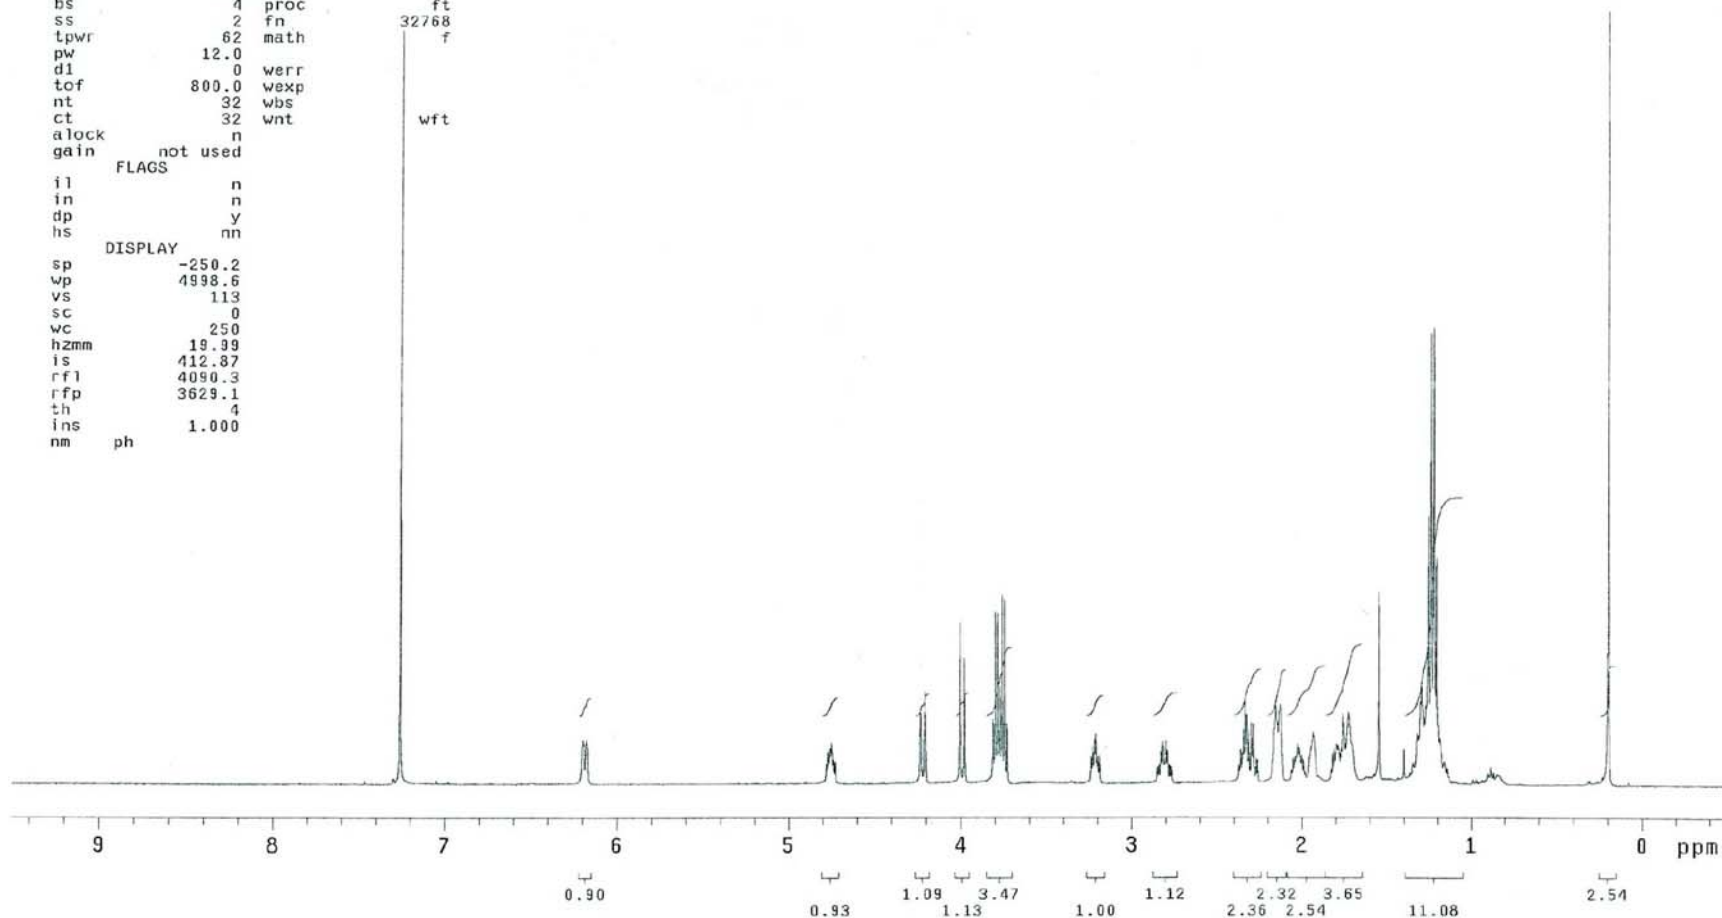

S103

WYKELN10028\_13C

exp3 s2pu1

| SAMPLE      |             | DEC. & VT  |          |
|-------------|-------------|------------|----------|
| date        | Apr 28 2010 | dfrq       | 499.874  |
| solvent     | CDC13       | dn         | H1       |
| file        | exp         | dpwr       | 48       |
| ACQUISITION |             |            |          |
| sfrq        | 125.707     | dm         | yyy      |
| tn          | C13         | dmm        | w        |
| at          | 1.092       | dmf        | 10000    |
| np          | 65536       | dseq       |          |
| sw          | 29396.3     | dres       | 1.0      |
| fb          | not used    | homo       | n        |
| bs          | 32          | temp       | 25.0     |
| tpwr        | 55          | DEC2       |          |
| pw          | 4.2         | dfrq2      | 0        |
| d1          | 0           | dn2        |          |
| tof         | 2000.0      | dpwr2      | 1        |
| nt          | 99999       | dof2       | 0        |
| ct          | 1088        | dm2        | n        |
| alock       | not used    | dmm2       | c        |
| gain        | not used    | dff2       | 10000    |
| FLAGS       |             |            |          |
| i1          | n           | dres2      | 1.0      |
| in          | n           | homo2      | n        |
| dp          | y           | DEC3       |          |
| hs          | nn          | dfrq3      | 0        |
| DISPLAY     |             |            |          |
| sp          | -1087.8     | dn3        |          |
| wp          | 29395.3     | dpwr3      | 1        |
| vs          | 21          | dof3       | 0        |
| sc          | 0           | dm3        | n        |
| wc          | 250         | dmm3       | c        |
| hzmm        | 119.98      | dff3       | 10000    |
| is          | 500.00      | dseq3      |          |
| rfl         | 10767.1     | dres3      | 1.0      |
| rff         | 9678.3      | homo3      | n        |
| th          | 5           | PROCESSING |          |
| ins         | 100.000     | lb         | 1.00     |
| nm          | cdc ph      | wfile      |          |
|             |             | proc       | ft       |
|             |             | fn         | not used |
|             |             | math       | f        |
|             |             | werr       |          |
|             |             | wexp       |          |
|             |             | wbs        |          |
|             |             | wnt        |          |

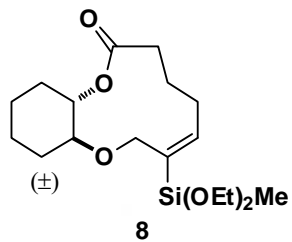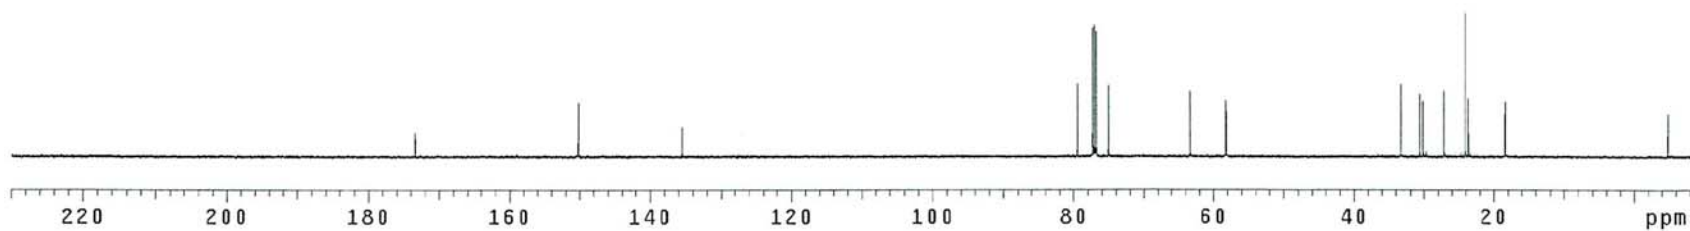

S104



WYKELN19028\_1H

expl s2pu1

| SAMPLE      |             | DEC. & VT |         |
|-------------|-------------|-----------|---------|
| date        | Apr 30 2011 | dfrq      | 499.874 |
| solvent     | CDC13       | dn        | H1      |
| file        | exp         | dpwr      | 30      |
| ACQUISITION |             |           |         |
| sfrq        | 499.875     | dm        | nnn     |
| tn          | H1          | dmm       | c       |
| at          | 2.184       | dmf       | 200     |
| np          | 32768       | dseq      |         |
| sw          | 7501.2      | dres      | 1.0     |
| fb          | not used    | homo      | n       |
| bs          | 4           | temp      | 25.0    |
| ss          | 2           |           |         |
| tpwr        | 62          | dfrq2     | DEC2 0  |
| pw          | 12.0        | dn2       |         |
| d1          | 0           | dpwr2     | 1       |
| tof         | 800.0       | dof2      | 0       |
| nt          | 16          | dm2       | n       |
| ct          | 0           | dmm2      | c       |
| alock       | n           | dmf2      | 200     |
| gain        | not used    | dseq2     |         |
| FLAGS       |             |           |         |
| il          | n           | dres2     | 1.0     |
| in          | n           | homo2     | n       |
| dp          | y           | dfrq3     | DEC3 0  |
| hs          | nn          | dn3       |         |
| DISPLAY     |             |           |         |
| sp          | -250.2      | dpwr3     | 1       |
| wp          | 4998.6      | dof3      | 0       |
| vs          | 77          | dm3       | n       |
| sc          | 0           | dmm3      | c       |
| wc          | 250         | dmf3      | 200     |
| hzmm        | 19.99       | dseq3     |         |
| is          | 316.85      | dres3     | 1.0     |
| rfl         | 4089.8      | homo3     | n       |
| PROCESSING  |             |           |         |
| rfrp        | 3629.1      | lb        | 1.10    |
| th          | 2           | wtfile    |         |
| ins         | 1.000       | proc      | ft      |
| nm          | ph          | fn        | 32768   |
|             |             | math      | f       |
|             |             | werr      |         |
|             |             | wexp      |         |
|             |             | wbs       |         |
|             |             | wnt       | wft     |

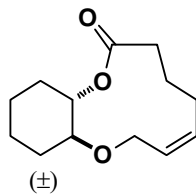

8b

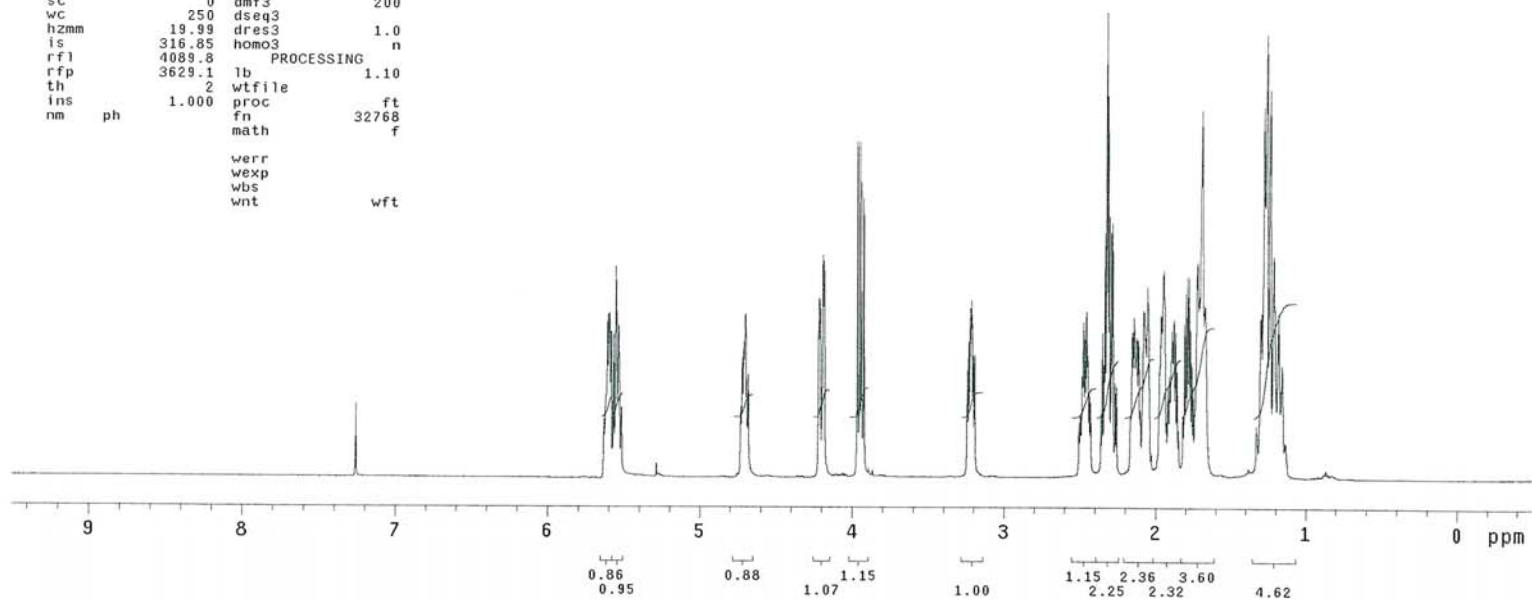

WYKELN19028\_13C

exp2 s2pu1

|             |             |           |            |
|-------------|-------------|-----------|------------|
| SAMPLE      |             | DEC. & VT |            |
| date        | Apr 30 2011 | dfrq      | 499.874    |
| solvent     | CDC13       | dn        | H1         |
| file        | exp         | dpwr      | 48         |
| ACQUISITION |             | dof       | 0          |
| sfrq        | 125.707     | dm        | yyy        |
| tn          | C13         | dmm       | w          |
| at          | 1.092       | dmf       | 8929       |
| np          | 65536       | dseq      |            |
| sw          | 29995.3     | dres      | 1.0        |
| fb          | not used    | homo      | n          |
| bs          | 16          | temp      | 25.0       |
| tpwr        | 55          |           | DEC2       |
| pw          | 4.8         | dfrq2     | 0          |
| d1          | 0           | dn2       |            |
| tof         | 2000.0      | dpwr2     | 1          |
| nt          | 9999        | dof2      | 0          |
| ct          | 0           | dm2       | n          |
| alock       | n           | dmm2      | c          |
| gain        | not used    | dmf2      | 10000      |
| FLAGS       |             | dseq2     |            |
| il          | n           | dres2     | 1.0        |
| in          | n           | homo2     | n          |
| dp          | y           |           | DEC3       |
| hs          | nn          | dfrq3     | 0          |
| DISPLAY     |             | dn3       |            |
| sp          | -1094.2     | dpwr3     | 1          |
| wp          | 29995.3     | dof3      | 0          |
| vs          | 30          | dm3       | n          |
| sc          | 0           | dmm3      | c          |
| wc          | 250         | dmf3      | 10000      |
| hzmm        | 119.98      | dseq3     |            |
| is          | 500.00      | dres3     | 1.0        |
| rfl         | 10773.5     | homo3     | n          |
| rfp         | 9678.3      |           | PROCESSING |
| th          | 6           | lb        | 1.00       |
| ins         | 100.000     | wtfile    |            |
| nm          | cdc ph      | proc      | ft         |
|             |             | fn        | not used   |
|             |             | math      | f          |
|             |             | werr      |            |
|             |             | wexp      |            |
|             |             | wbs       |            |
|             |             | wnt       |            |

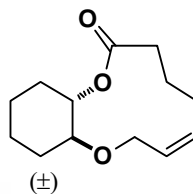

8b

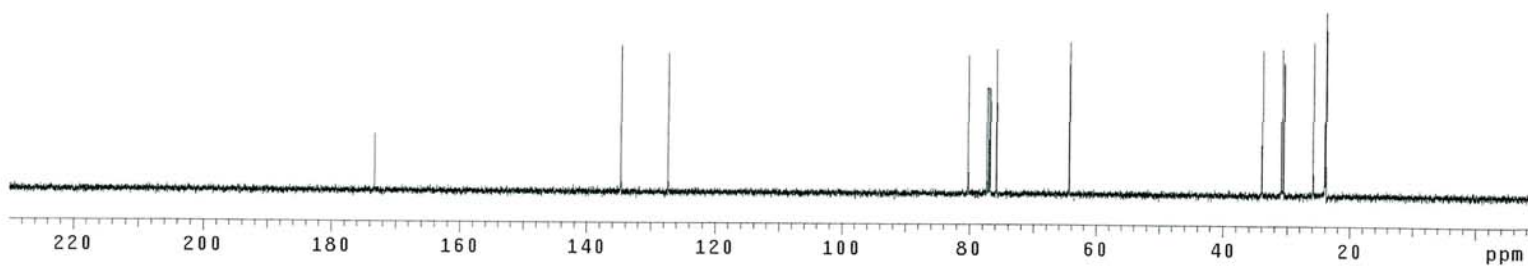

S106

WYKELN8086\_1H

exp1 s2pu1

```
SAMPLE          DEC. & VT
date Apr 28 2010 dfrq      499.874
solvent CDC13      dn       H1
file /export/home/~ dpwr     30
ds2/vnmr/sys/data/1~ dof      0
500c/schreiber/WAN~ dm       nnn
G/Pub1/WYKELN8086_~ dmm      c
1H.fid          dmf       200

ACQUISITION
sfrq      499.875 dres     1.0
tn        H1 homo      n
at        2.184 temp     25.0
np        32768
sw        7501.2 lb       1.10
fb        not used wtfile
bs        4 proc        ft
ss        2 fn         32768
tpwr     62 math       f
pw        12.0
d1        0 werr
tof       800.0 wexp
nt        32 wbs
cl        32 wnt       wft
alock     n
gain      not used

FLAGS
fl        n
in        n
dp        y
hs        nn

DISPLAY
sp        -250.2
wp        4998.6
vs        151
sc        0
wc        250
hzmm     19.99
ls        428.73
rf1      4090.3
rfp      3629.1
th        2
ins       2.000
nm        ph
```

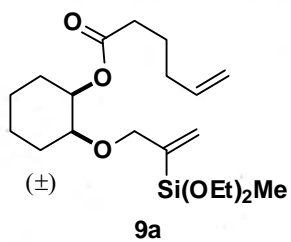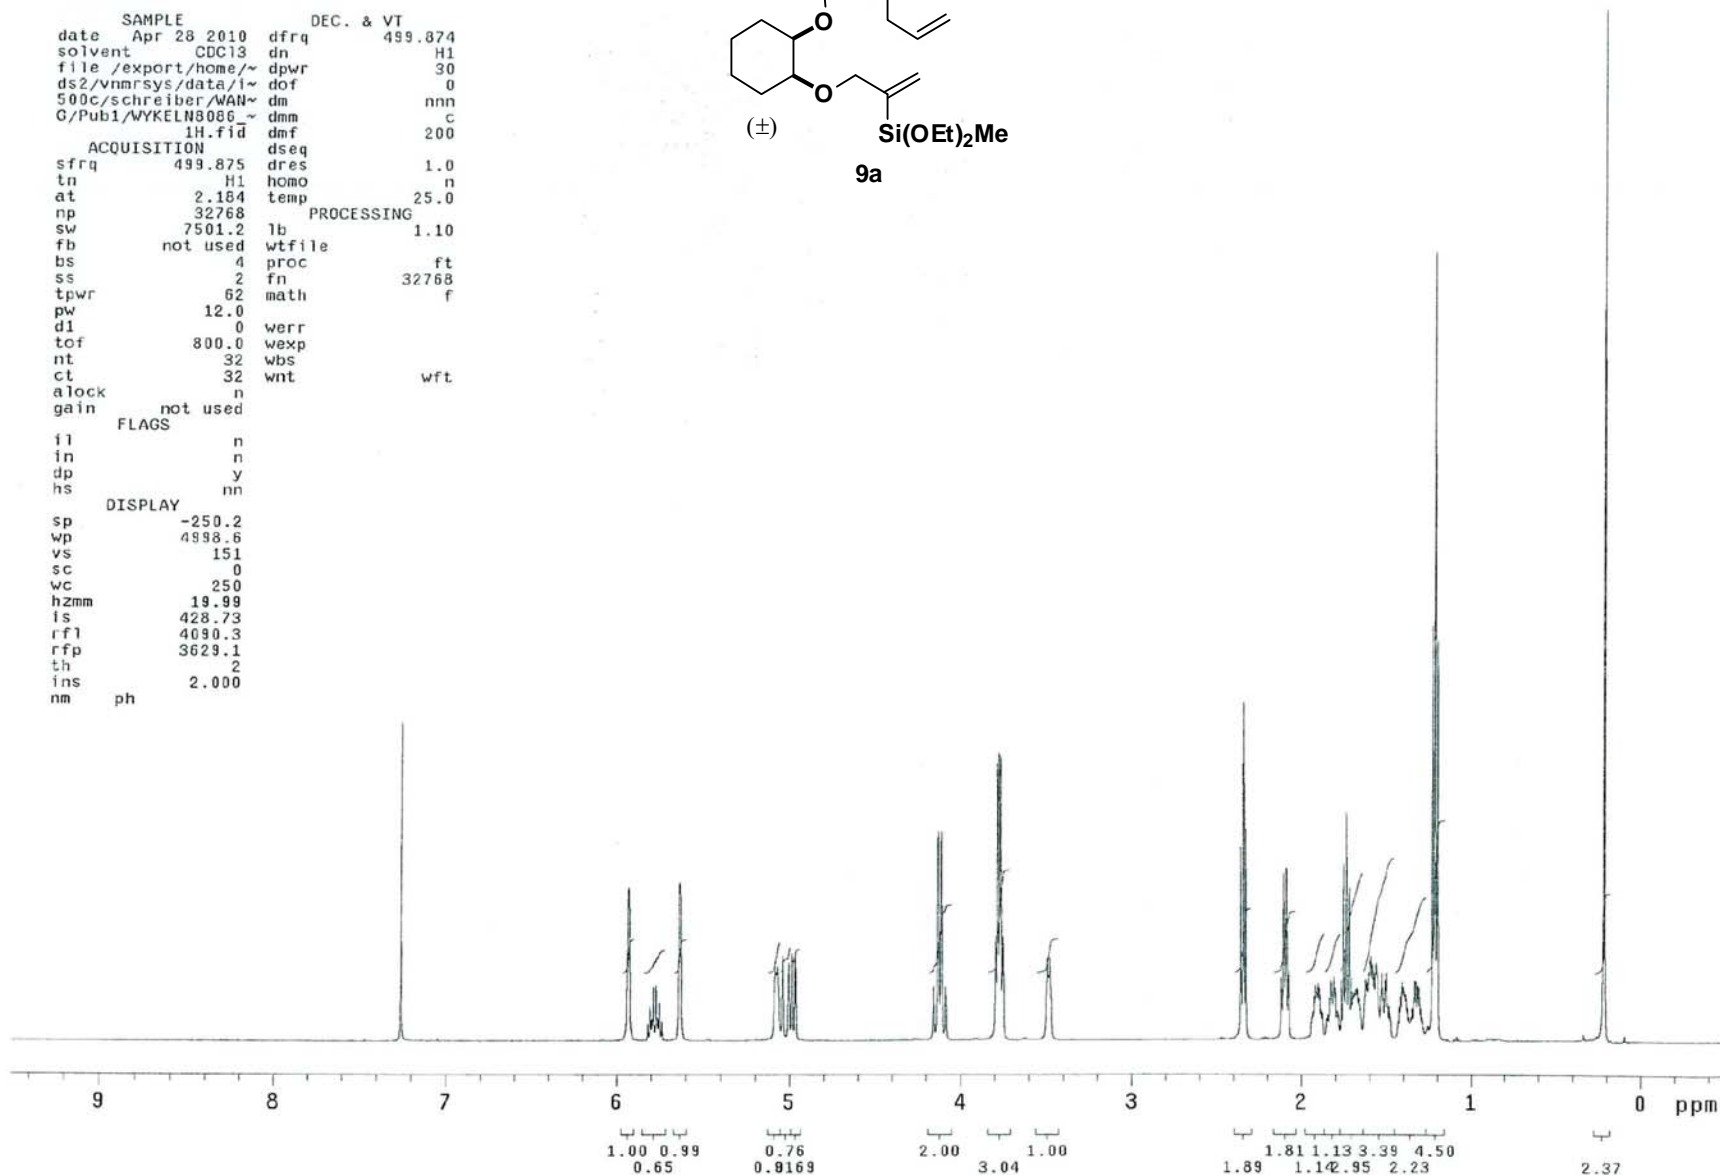

S107

WYKELN8086\_13C

exp3 s2pu1

| SAMPLE      |             | DEC. & VT |          |
|-------------|-------------|-----------|----------|
| date        | Apr 28 2010 | dfrq      | 499.874  |
| solvent     | CDCl3       | dn        | H1       |
| file        | exp         | dpwr      | 48       |
| ACQUISITION |             |           |          |
| sfrq        | 125.707     | dm        | yyy      |
| tn          | C13         | dmm       | w        |
| at          | 1.092       | dmf       | 10000    |
| np          | 65536       | dseq      |          |
| sw          | 29996.3     | dres      | 1.0      |
| fb          | not used    | homo      | n        |
| bs          | 32          | temp      | 25.0     |
| tpwr        | 55          | DEC2      |          |
| pw          | 4.2         | dfrq2     | 0        |
| d1          | 0           | dn2       |          |
| tof         | 2000.0      | dpwr2     | 1        |
| nt          | 99999       | dof2      | 0        |
| ct          | 896         | dm2       | n        |
| alock       | not used    | dmm2      | c        |
| gain        | not used    | dmf2      | 10000    |
| FLAGS       |             |           |          |
| il          | n           | dres2     | 1.0      |
| in          | n           | homo2     | n        |
| dp          | y           | DEC3      |          |
| hs          | nn          | dfrq3     | 0        |
| DISPLAY     |             |           |          |
| sp          | -1087.8     | dn3       |          |
| wp          | 29995.3     | dpwr3     | 1        |
| vs          | 39          | dof3      | 0        |
| sc          | 0           | dm3       | n        |
| wc          | 250         | dmm3      | c        |
| hzmm        | 119.98      | dmf3      | 10000    |
| is          | 500.00      | dseq3     |          |
| rfl         | 1088.7      | dres3     | 1.0      |
| rfl         | 0           | homo3     | n        |
| PROCESSING  |             |           |          |
| th          | 4           | lb        | 1.00     |
| ins         | 100.000     | wfile     |          |
| nm          | cdc ph      | proc      | ft       |
|             |             | fn        | not used |
|             |             | math      | f        |
|             |             | werr      |          |
|             |             | wexp      |          |
|             |             | wbs       |          |
|             |             | wnt       |          |

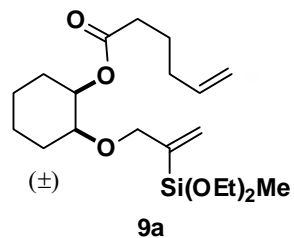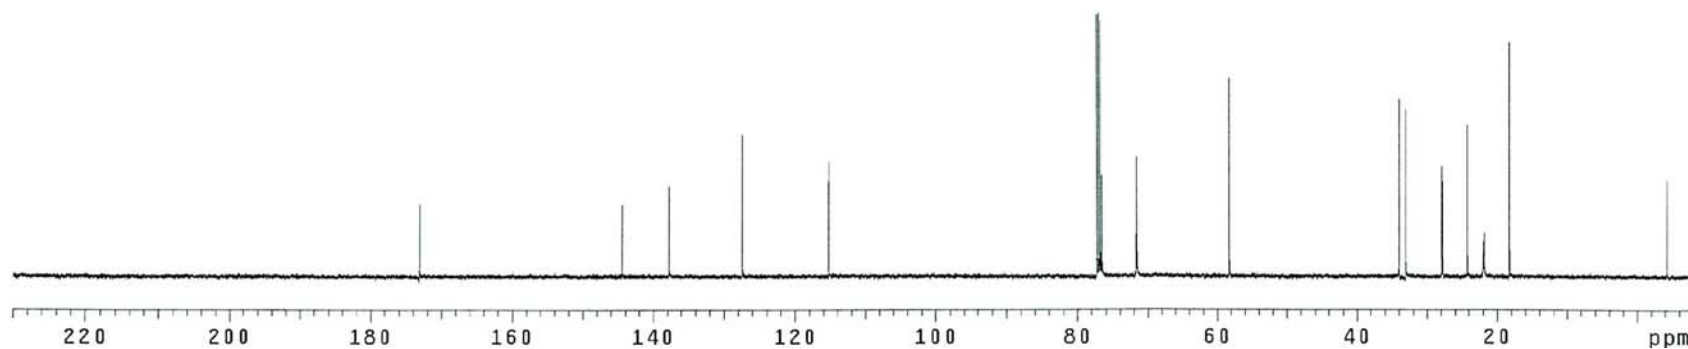

S108

WYKELN10029\_1H

exp1 s2pu1

SAMPLE DEC. & VT  
date Apr 28 2010 dfrq 499.874  
solvent CDC13 dn H1  
file /export/home/~ dpwr 30  
ds2/vnmrsys/data/i~ dof 0  
500c/schreiber/WAN~ dm nnn  
G/Pub1/WYKELN10029~ dmm c  
\_1H.fid dmf 200

ACQUISITION  
sfrq 499.875 dseq  
tn H1 dres 1.0  
at 2.184 homo n  
np 32768 temp 25.0

PROCESSING  
sw 7501.2 lb 1.10  
fb not used wtfile  
bs 4 proc ft  
ss 2 fn 32768  
tpwr 62 math f  
pw 12.0  
d1 0 werr  
tof 800.0 wexp  
nt 32 wbs  
ct 32 wnt wft  
alock n  
gain not used

FLAGS  
il n  
in n  
dp y  
hs nn

DISPLAY  
sp -250.2  
wp 4998.6  
vs 109  
sc 0  
wc 250  
hzmm 19.99  
is 362.42  
rfl 4090.3  
rfp 3629.1  
th 1  
ins 1.000  
nm ph

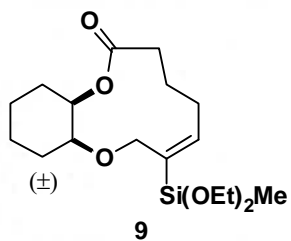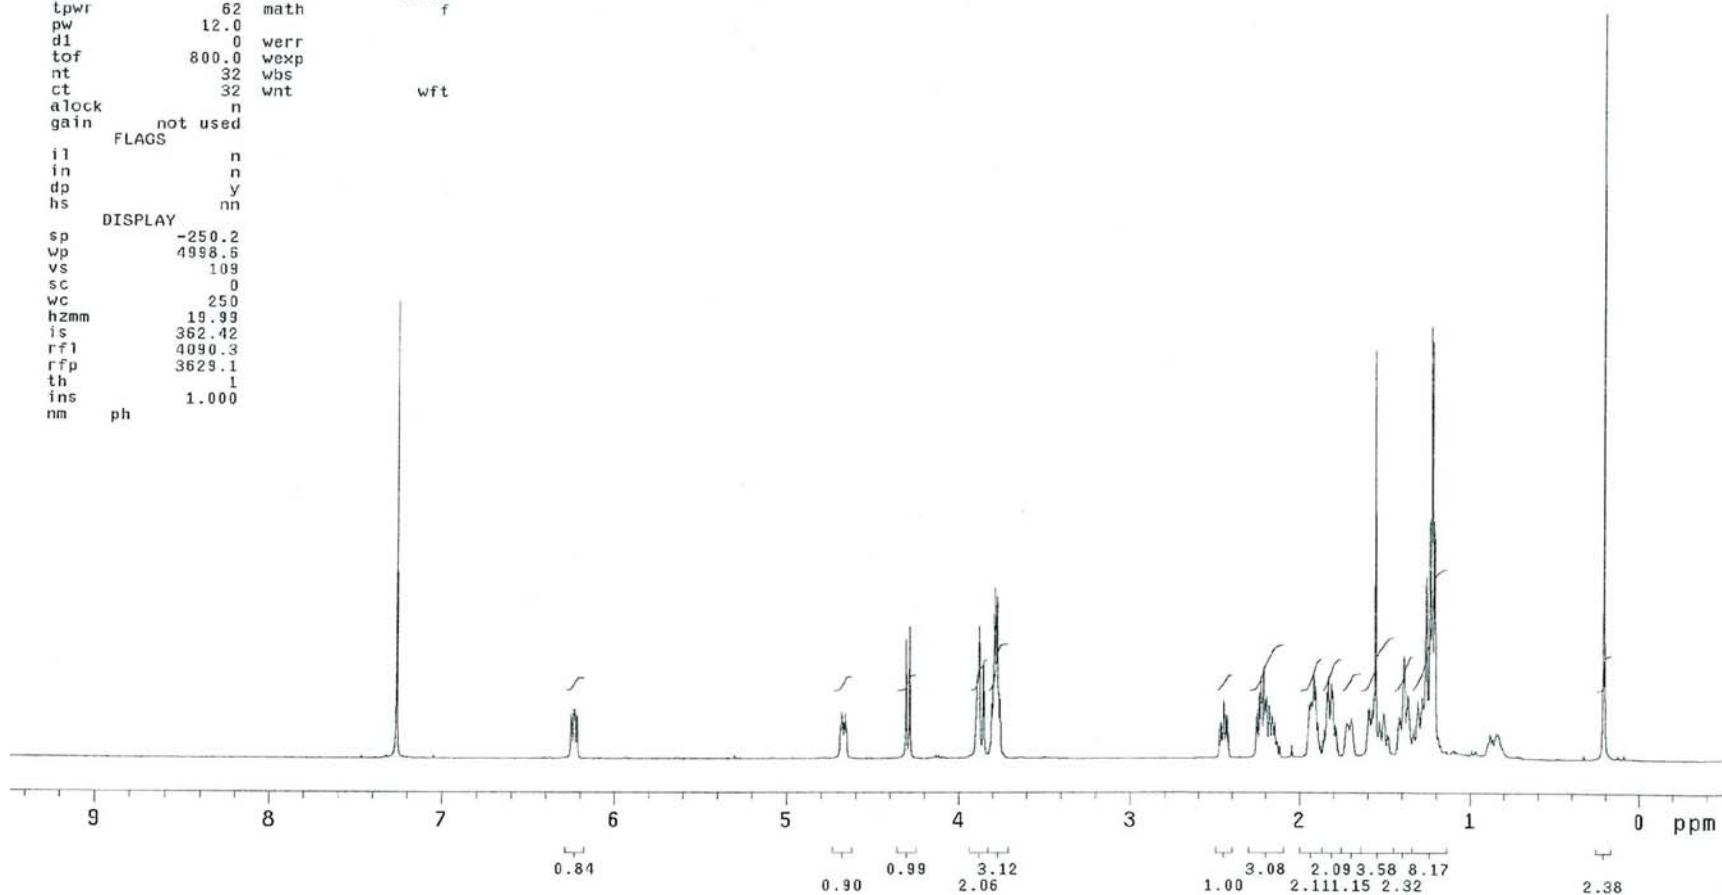

S109

WYKELN10029\_13C

exp2 s2pu1

| SAMPLE      |             | DEC. & VT |            |
|-------------|-------------|-----------|------------|
| date        | Apr 28 2010 | dfrq      | 499.874    |
| solvent     | CDC13       | dn        | H1         |
| file        | exp         | dpwr      | 48         |
| ACQUISITION |             |           |            |
| sfrq        | 125.707     | dm        | YY         |
| tn          | C13         | dmm       | w          |
| at          | 1.092       | dmf       | 10000      |
| np          | 65536       | dseq      |            |
| sw          | 29996.3     | dres      | 1.0        |
| fb          | not used    | homo      | n          |
| bs          | 32          | temp      | 25.0       |
| tpwr        | 55          |           | DEC2       |
| pw          | 4.2         | dfrq2     | 0          |
| d1          | 0           | dn2       |            |
| tof         | 2000.0      | dpwr2     | 1          |
| nt          | 99999       | dof2      | 0          |
| ct          | 4224        | dm2       | n          |
| alock       | not used    | dmm2      | n          |
| gain        | not used    | dmf2      | 10000      |
| FLAGS       |             |           |            |
| i1          | n           | dres2     | 1.0        |
| i2          | n           | homo2     | n          |
| dp          | y           |           | DEC3       |
| hs          | nn          | dfrq3     | 0          |
| DISPLAY     |             |           |            |
| sp          | -1086.9     | dn3       |            |
| wp          | 29995.3     | dpwr3     | 1          |
| vs          | 256         | dof3      | 0          |
| sc          | 0           | dm3       | n          |
| wc          | 250         | dmm3      | c          |
| hzmm        | 119.98      | dmf3      | 10000      |
| is          | 500.00      | dseq3     |            |
| rfl         | 10766.2     | dres3     | 1.0        |
| rfl         | 10766.2     | homo3     | n          |
| rfl         | 9678.3      |           | PROCESSING |
| th          | 4           | lb        | 1.00       |
| ins         | 100.000     | wtfile    |            |
| nm          | cdc ph      | proc      | ft         |
|             |             | fn        | not used   |
|             |             | math      | f          |
|             |             | werr      |            |
|             |             | wexp      |            |
|             |             | wbs       |            |
|             |             | wnt       |            |

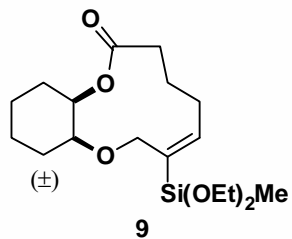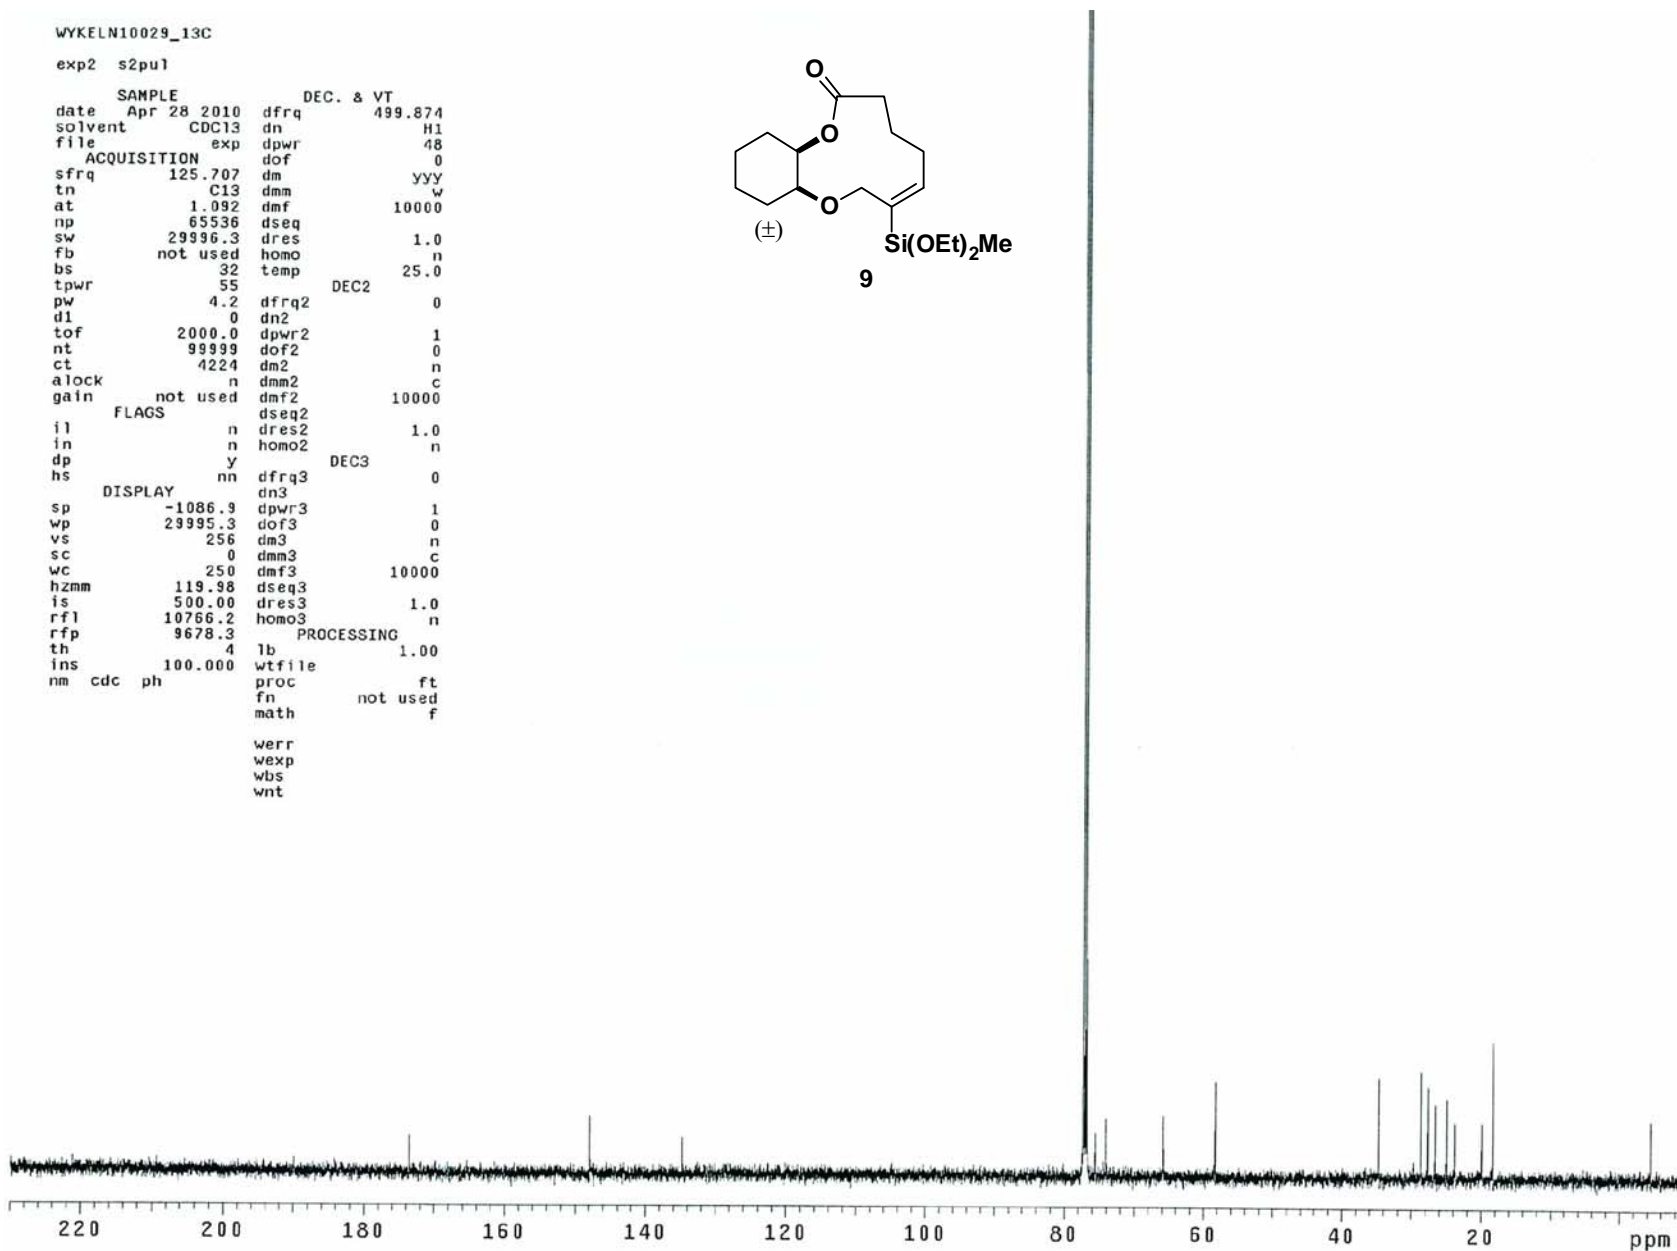

S110

WYKELN19029\_1H

exp1 s2pu1

|             |             |            |         |
|-------------|-------------|------------|---------|
| date        | SAMPLE      | DEC. & VT  |         |
| Apr 30 2011 |             | dfrq       | 499.874 |
| solvent     | CDCl3       | dn         | H1      |
| file        | exp         | dpwr       | 30      |
|             | ACQUISITION | dof        | 0       |
| sfrq        | 499.875     | dm         | nnn     |
| tn          | H1          | dmm        | c       |
| at          | 2.184       | dmf        | 200     |
| np          | 32768       | dseq       |         |
| sw          | 7501.2      | dres       | 1.0     |
| fb          | not used    | homo       | n       |
| bs          | 4           | temp       | 25.0    |
| ss          | 2           |            |         |
| tpwr        | 62          | DEC2       | 0       |
| pw          | 12.0        | dn2        |         |
| d1          | 0           | dpwr2      | 1       |
| tof         | 800.0       | dof2       | 0       |
| nt          | 16          | dm2        | n       |
| ct          | 16          | dmm2       | c       |
| alock       | n           | dmf2       | 200     |
| gain        | not used    | dseq2      |         |
|             | FLAGS       | dres2      | 1.0     |
| il          | n           | homo2      | n       |
| in          | n           |            |         |
| dp          | y           | DEC3       | 0       |
| hs          | nn          | dfrq3      |         |
|             | DISPLAY     | dn3        |         |
| sp          | -250.2      | dpwr3      | 1       |
| wp          | 4998.6      | dof3       | 0       |
| vs          | 76          | dm3        | n       |
| sc          | 0           | dmm3       | c       |
| wc          | 250         | dmf3       | 200     |
| h2mm        | 19.99       | dseq3      |         |
| is          | 307.76      | dres3      | 1.0     |
| rfl         | 4089.4      | homo3      | n       |
| rfp         | 3629.1      |            |         |
| th          | 7           | PROCESSING |         |
| ins         | 1.000       | lb         | 1.10    |
| nm          | ph          | wtfile     |         |
|             |             | proc       | ft      |
|             |             | fn         | 32768   |
|             |             | math       | f       |
|             |             | werr       |         |
|             |             | wexp       |         |
|             |             | wbs        |         |
|             |             | wnt        | wft     |

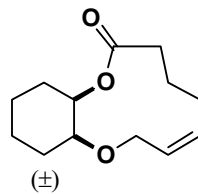

9b

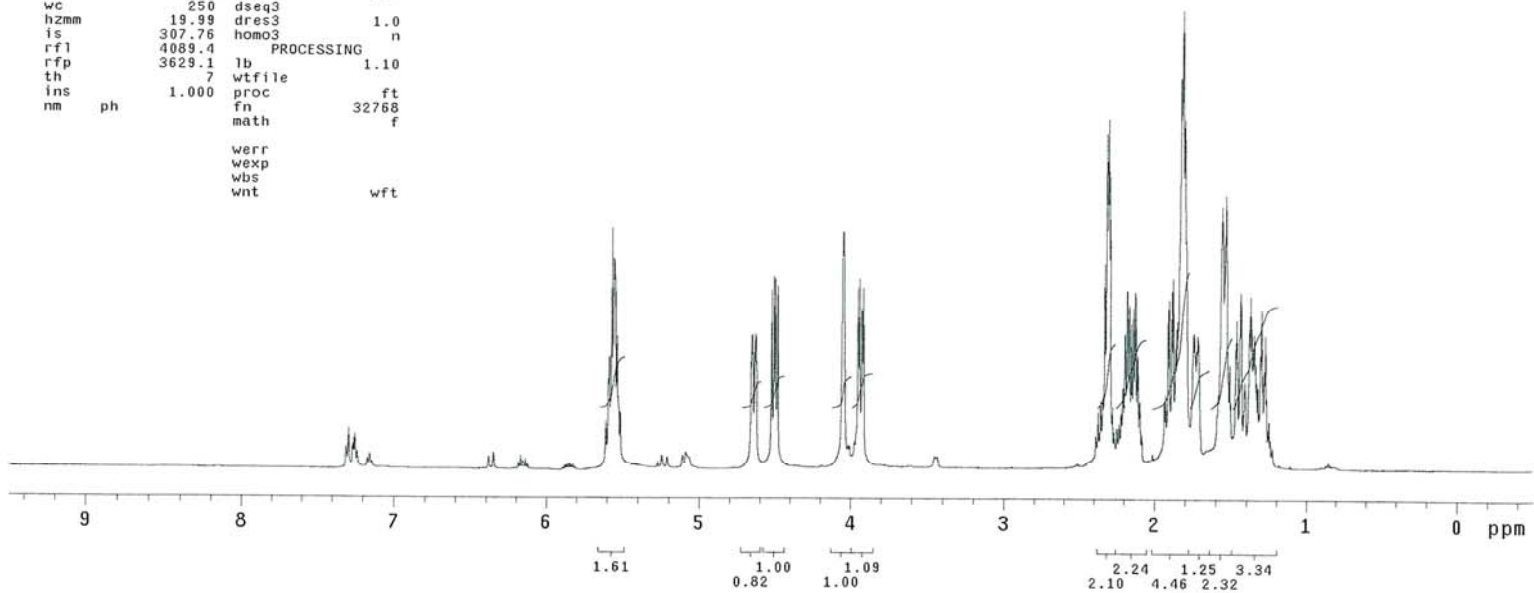

WYKELN19029\_13C

exp2 s2pu1

|             |             |        |           |          |
|-------------|-------------|--------|-----------|----------|
| date        | Apr 30 2011 | dfrq   | DEC. & VT | 499.874  |
| solvent     | CDC13       | dn     |           | H1       |
| file        | exp         | dpwr   |           | 48       |
| ACQUISITION |             |        |           |          |
| sfrq        | 125.707     | dm     |           | yyy      |
| tn          | C13         | dmm    |           | w        |
| at          | 1.092       | dmf    |           | 8929     |
| np          | 65536       | dseq   |           |          |
| sw          | 29996.3     | dres   |           | 1.0      |
| fb          | not used    | homo   |           | n        |
| bs          | 16          | temp   |           | 25.0     |
| tpwr        | 55          |        | DEC2      |          |
| pw          | 4.8         | dfrq2  |           | 0        |
| d1          | 0           | dn2    |           |          |
| tof         | 2000.0      | dpwr2  |           | 1        |
| nt          | 9999        | dof2   |           | 0        |
| ct          | 400         | dm2    |           | n        |
| alock       | n           | dmm2   |           | c        |
| gain        | not used    | dmf2   |           | 10000    |
| FLAGS       |             |        |           |          |
| ll          | n           | dseq2  |           | 1.0      |
| in          | n           | dres2  |           | n        |
| dp          | y           | homo2  | DEC3      |          |
| hs          | nn          | dfrq3  |           | 0        |
| DISPLAY     |             |        |           |          |
| sp          | -1094.2     | dn3    |           |          |
| wp          | 29995.3     | dpwr3  |           | 1        |
| vs          | 30          | dof3   |           | 0        |
| sc          | 0           | dm3    |           | n        |
| wc          | 250         | dmm3   |           | c        |
| hzmm        | 119.98      | dmf3   |           | 10000    |
| is          | 500.00      | dseq3  |           | 1.0      |
| rfl         | 10773.5     | dres3  |           | n        |
| rff         | 9678.3      | homo3  |           |          |
| PROCESSING  |             |        |           |          |
| th          | 6           | lb     |           | 1.00     |
| ins         | 100.000     | wtfile |           |          |
| nm          | cdc ph      | proc   |           | ft       |
|             |             | fn     |           | not used |
|             |             | math   |           | f        |
|             |             | werr   |           |          |
|             |             | wexp   |           |          |
|             |             | wbs    |           |          |
|             |             | wnt    |           |          |

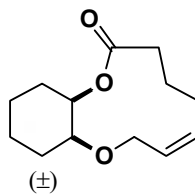

9b

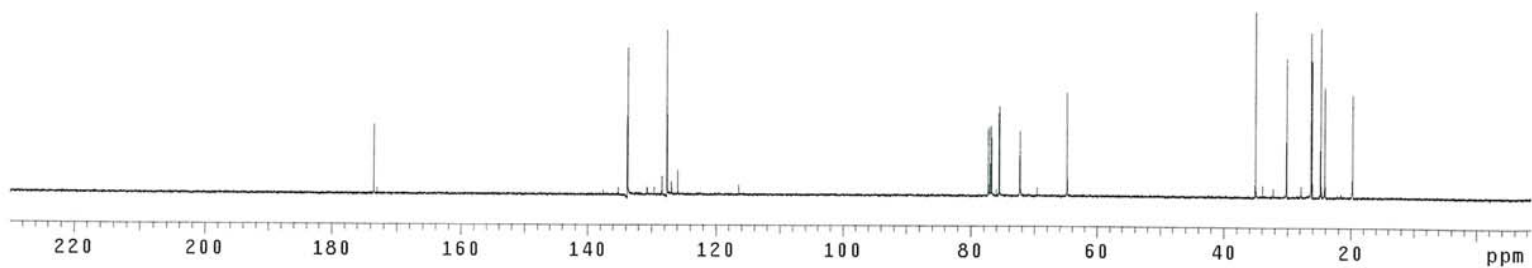

S112



WYKELN9044\_1H

exp1 s2pu1

```
SAMPLE          DEC. & VT
date  May 21 2010  dfrq  499.874
solvent  CDC13    dn     H1
file  /export/home/~ dpwr   30
ds2/vnmrsys/data/i~ dof    0
500c/schreiber/WAN~ dm     nnn
G/Pub1/WYKELN9044_~ dmm    c
1H.fid  dmf     200
ACQUISITION
sfrq  499.875    dres   1.0
tn     H1        homo   n
at     2.184     temp  24.0
np     32768
sw     7501.2    tb     1.10
fb     not used  wtfile
bs     4         proc   ft
ss     2         fn     32768
tpwr   62       math   f
pw     12.0
d1     0         verr
tof    800.0    wexp
nt     32       wbs
ct     32       wnt
alock  n
gain   not used
      FLAGS
fl     n
in     n
dp     y
hs     nn
DISPLAY
sp     -250.2
wp     4998.6
vs     154
sc     0
wc     250
hzm    19.99
is     246.60
rfl    4089.8
rfp    3629.1
th     7
ins    2.000
nm     ph
```

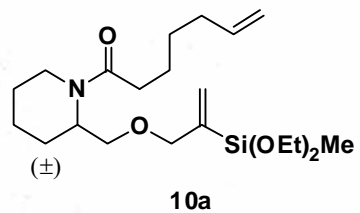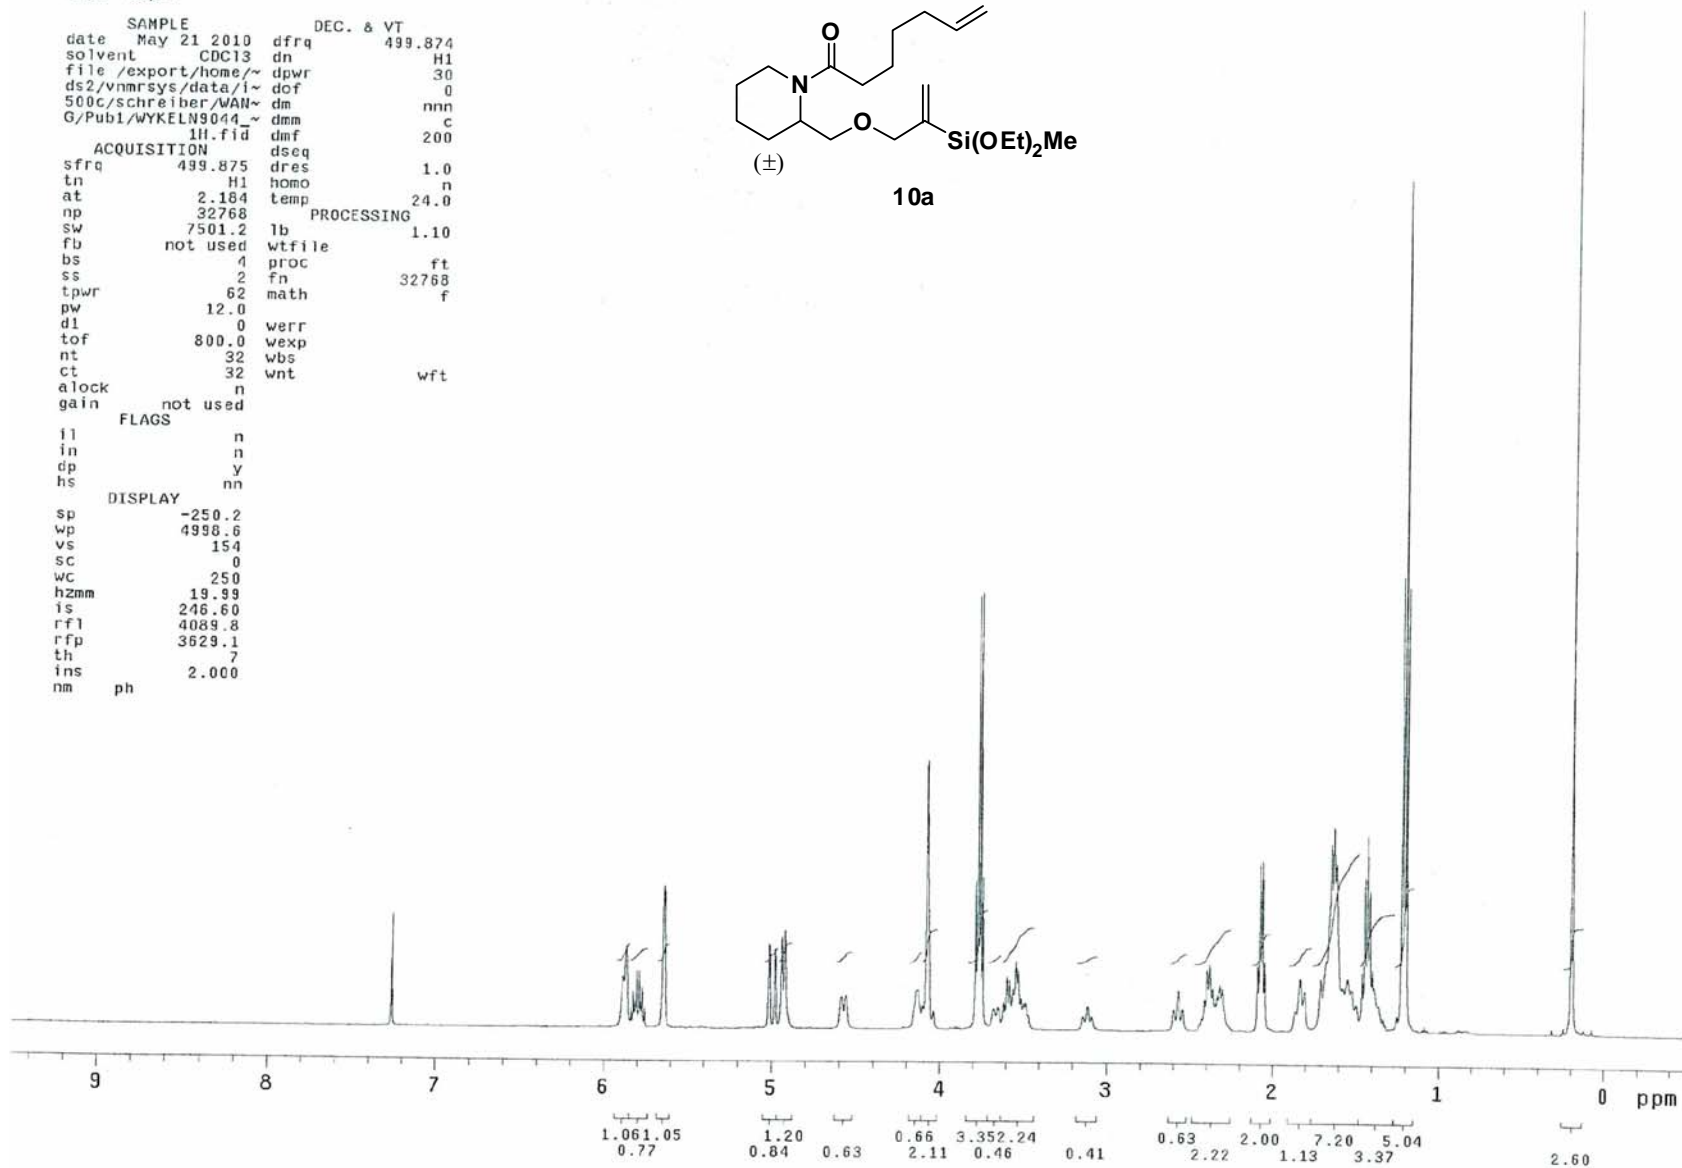

S113

WYKELN9044\_13C\_2

exp1 s2pu1

| SAMPLE  |             | DEC. & VT |            |
|---------|-------------|-----------|------------|
| date    | May 21 2010 | dfrq      | 499.874    |
| solvent | CDC13       | dn        | H1         |
| file    | exp         | dpwr      | 48         |
|         | ACQUISITION | dof       | 0          |
| sfrq    | 125.707     | dm        | yyy        |
| tn      | C13         | dmm       | w          |
| at      | 1.092       | dmf       | 10000      |
| np      | 65536       | dseq      |            |
| sw      | 29996.3     | dres      | 1.0        |
| fb      | not used    | homo      | n          |
| bs      | 32          | temp      | 24.0       |
| tpwr    | 55          |           | DEC2       |
| pw      | 4.2         | dfrq2     | 0          |
| d1      | 0           | dn2       |            |
| tof     | 2000.0      | dpwr2     | 1          |
| nt      | 99999       | dof2      | 0          |
| ct      | 1408        | dm2       | n          |
| alock   | n           | dmm2      | c          |
| gain    | not used    | dmf2      | 10000      |
|         | FLAGS       | dseq2     |            |
| il      | n           | dres2     | 1.0        |
| in      | n           | homo2     | n          |
| dp      | y           |           | DEC3       |
| hs      | nn          | dfrq3     | 0          |
|         | DISPLAY     | dn3       |            |
| sp      | -1091.5     | dpwr3     | 1          |
| wp      | 29995.3     | dof3      | 0          |
| vs      | 72          | dm3       | n          |
| sc      | 0           | dmm3      | c          |
| wc      | 250         | dmf3      | 10000      |
| hzmm    | 119.98      | dseq3     |            |
| is      | 500.00      | dres3     | 1.0        |
| rfl     | 10770.7     | homo3     | n          |
| rfp     | 9678.3      |           | PROCESSING |
| th      | 3           | lb        | 1.00       |
| ins     | 100.000     | wfile     |            |
| nm      | cdc ph      | proc      | ft         |
|         |             | fn        | not used   |
|         |             | math      | f          |
|         |             | werr      |            |
|         |             | wexp      |            |
|         |             | wbs       |            |
|         |             | wnt       |            |

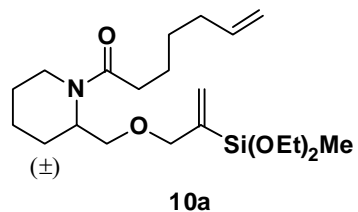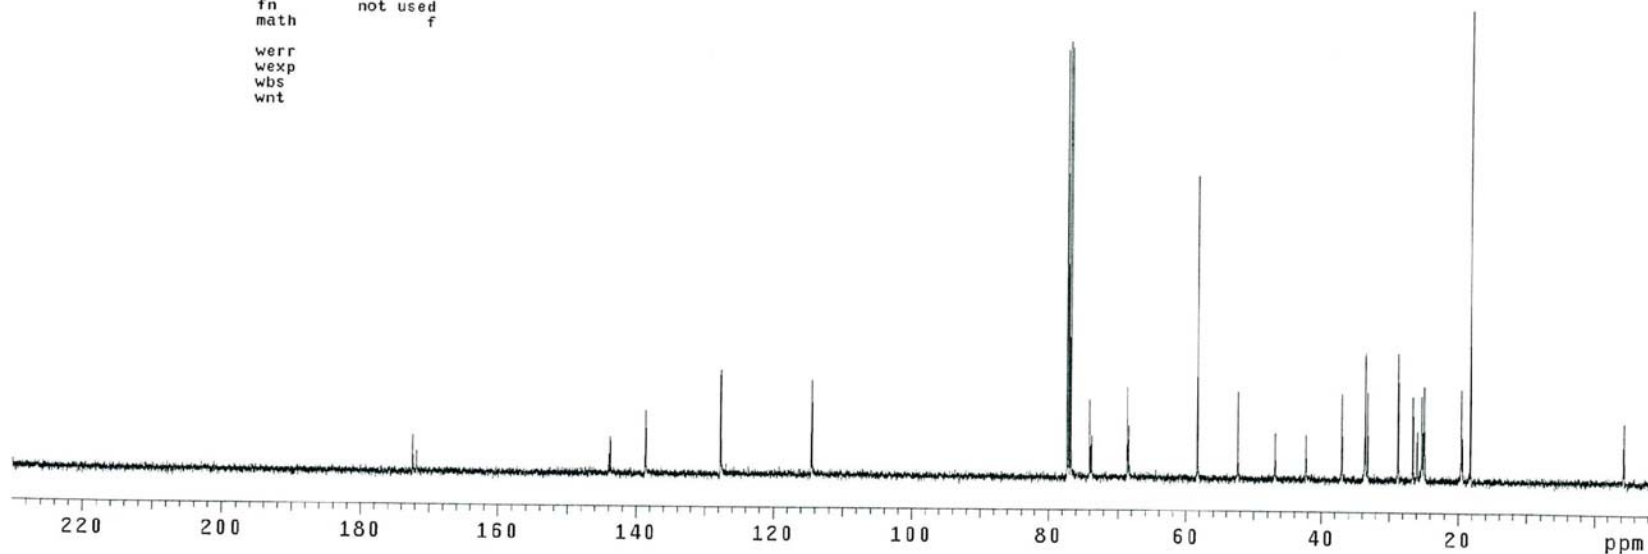

S114

WYKELN10035\_1H

expl s2pu1

```
SAMPLE          DEC. & VT
date    May 22 2010    dfrq    499.874
solvent  CDC13         dn        H1
file    /export/home/~ ds2/vnmrsys/data/i- dpwr    30
500c/schreiber/WAN-   dof      0
G/Pub1/WYKELN10035~  dm       nnn
1H.fid      dmm      c
ACQUISITION      dmf    200
sfrq    499.875     dseq
tn       H1         dres    1.0
at       2.184     homo   n
np       32768     temp   24.0
sw       7501.2    lb      1.10
fb       not used  wtfile
bs       4         proc    ft
ss       2         fn      32768
tpwr    52        math    f
pw       12.0
d1       0         werr
tof      800.0     wexp
nt       32       wbs
ct       32       wnt
alock    n
gain     not used
        FLAGS
il       n
in       n
dp       y
hs       nn
        DISPLAY
sp       -250.2
wp       4998.6
vs       151
sc       0
wc       250
hzmm    19.99
is       268.16
rfl     4089.8
rfp     3629.1
th       7
ins     1.000
nm      ph
```

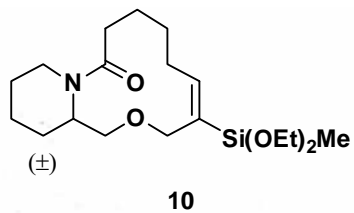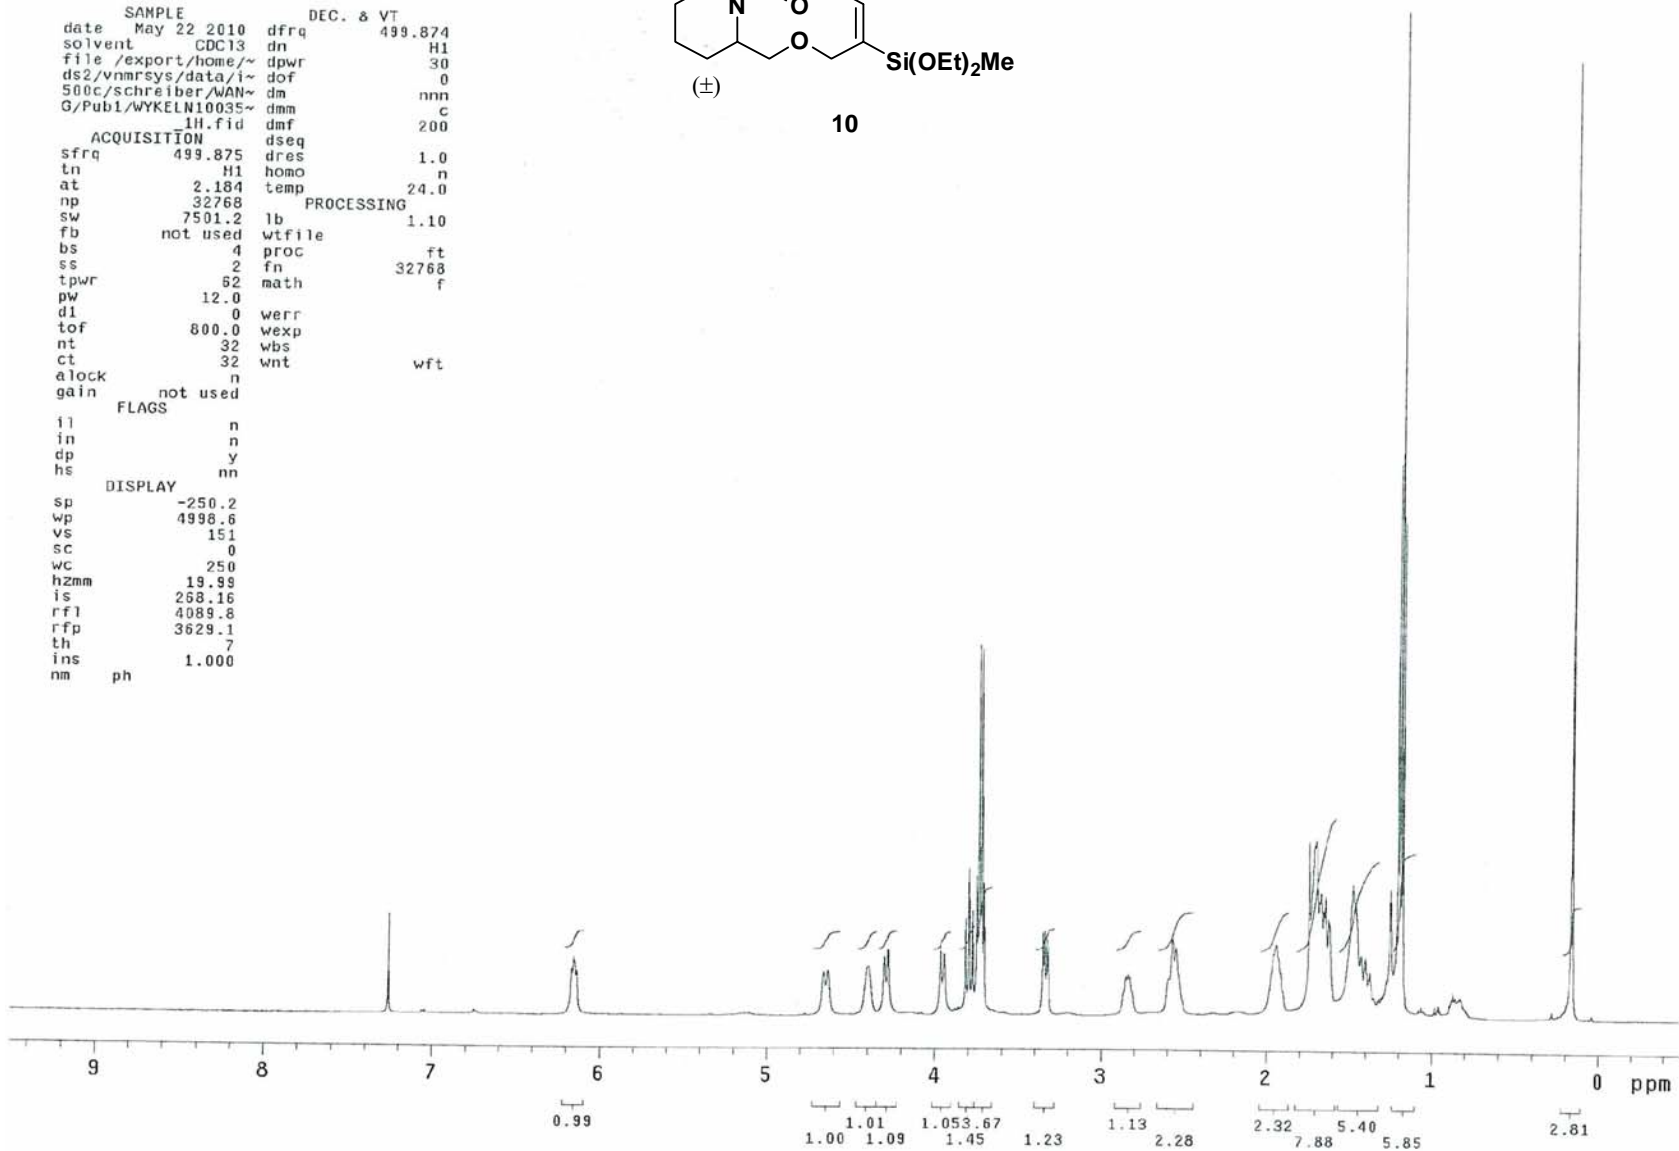

S115

WYKELN10035\_13C

exp3 s2pu1

| SAMPLE      |             | DEC. & VT |            |
|-------------|-------------|-----------|------------|
| date        | May 22 2010 | dfrq      | 499.874    |
| solvent     | CDC13       | dn        | H1         |
| file        | exp         | dpwr      | 48         |
| ACQUISITION |             | dof       | 0          |
| sfrq        | 125.707     | dm        | yyv        |
| tn          | C13         | dmm       | w          |
| at          | 1.092       | dmf       | 10000      |
| np          | 65536       | dseq      |            |
| sw          | 29996.3     | dres      | 1.0        |
| fb          | not used    | homo      | n          |
| bs          | 32          | temp      | 24.0       |
| tpwr        | 55          |           | DEC2       |
| pw          | 4.2         | dfrq2     | 0          |
| d1          | 0           | dn2       |            |
| tof         | 2000.0      | dpwr2     | 1          |
| nt          | 99999       | dof2      | 0          |
| ct          | 3200        | dm2       | n          |
| alock       | not used    | dmm2      | c          |
| gain        | not used    | dmf2      | 10000      |
| FLAGS       |             | dseq2     |            |
| il          | n           | dres2     | 1.0        |
| in          | n           | homo2     | n          |
| dp          | y           |           | DEC3       |
| hs          | nn          | dfrq3     | 0          |
| DISPLAY     |             | dn3       |            |
| sp          | -1088.7     | dpwr3     | 1          |
| wp          | 29995.3     | dof3      | 0          |
| vs          | 95          | dm3       | n          |
| sc          | 0           | dmm3      | c          |
| wc          | 250         | dmf3      | 10000      |
| hzmm        | 119.98      | dseq3     |            |
| is          | 500.00      | dres3     | 1.0        |
| rfl         | 10768.0     | homo3     | n          |
| rfp         | 9678.3      |           | PROCESSING |
| th          | 3           | lb        | 1.00       |
| ins         | 100.000     | wfile     |            |
| nm          | cdc ph      | proc      | ft         |
|             |             | fn        | not used   |
|             |             | math      | f          |
|             |             | werr      |            |
|             |             | wexp      |            |
|             |             | wbs       |            |
|             |             | wnt       |            |

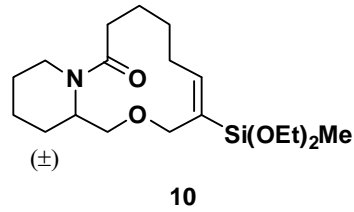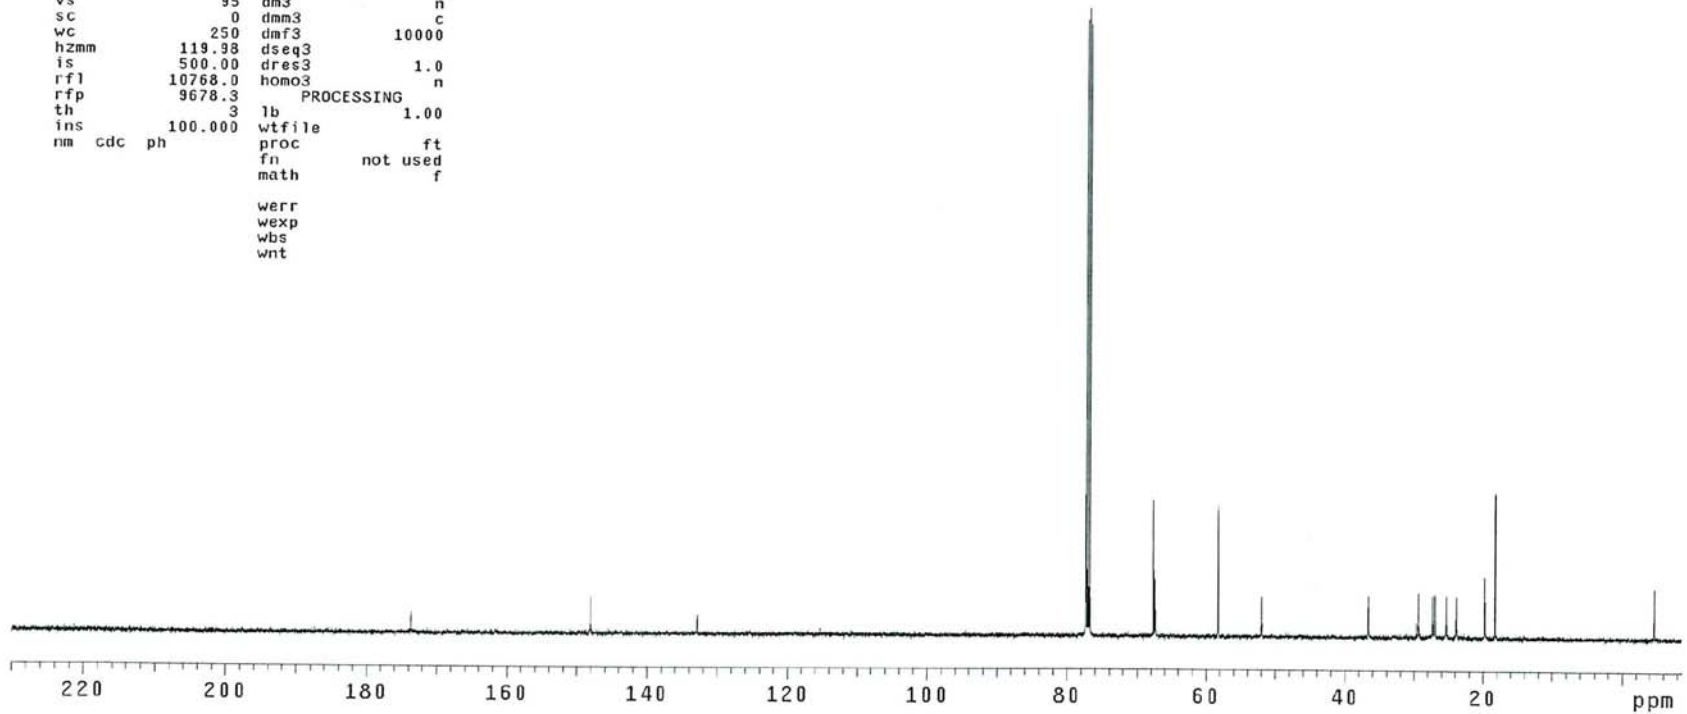

S116

WYKELN19035\_1H

exp1 s2pul

```

SAMPLE
date Apr 30 2011 dfrq DEC. & VT 499.874
solvent CDC13 dn H1
file exp dpwr 30
ACQUISITION dof 0
sfrq 499.875 dm nnn
tn H1 dmm c
at 2.184 dmf 200
np 32768 dseq
sw 7501.2 dres 1.0
fb not used homo n
bs 4 temp 25.0
ss 2 DEC2
tpwr 62 dfrq2 0
pw 12.0 dn2 1
d1 0 dpwr2 1
tof 800.0 dof2 0
nt 16 dm2 n
ct 0 dmm2 c
alock n dmf2 200
gain not used dseq2
FLAGS n dres2 1.0
il n homo2 n
in n DEC3
dp y dfrq3 0
hs nn dn3
DISPLAY dpwr3 1
sp -250.2 dof3 0
wp 4998.6 dm3 n
vs 62 dmm3 c
sc 0 dmf3 200
wc 250 dseq3
hzmm 19.99 dres3 1.0
is 230.66 homo3 n
rf1 4089.4 PROCESSING
rfp 3629.1 lb 1.10
th 5 wtfile
ins 1.000 proc ft
nm ph fn 32768
math f

werr
wexp
wbs
wnt wft
```

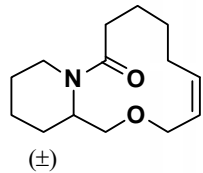

10b

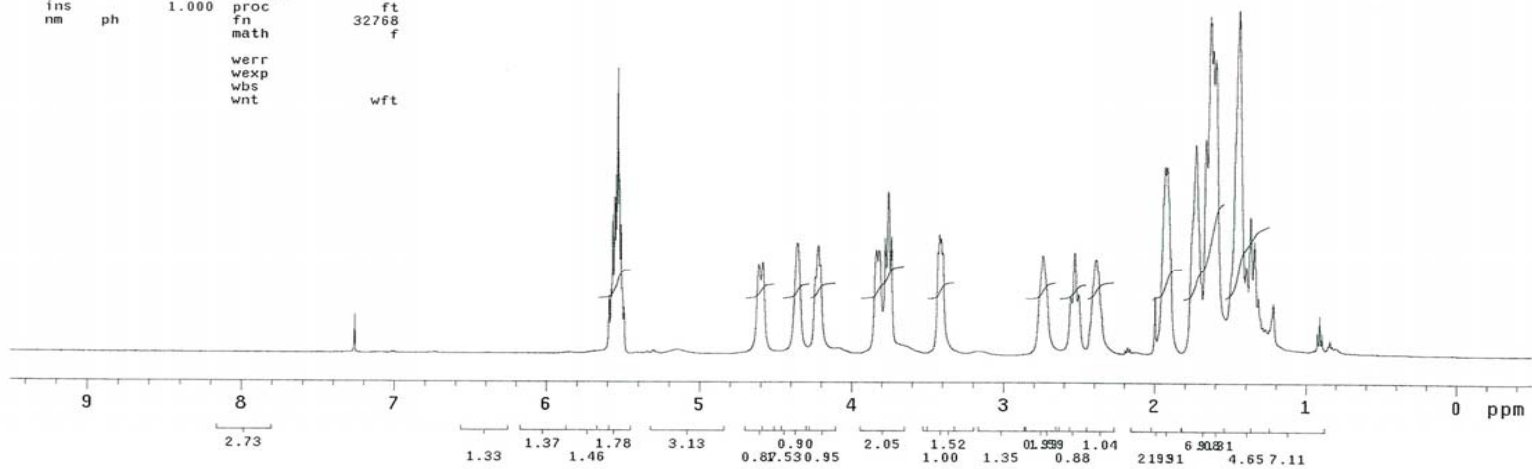

S117

WYKELN19035\_13C

exp2 s2pu1

| SAMPLE      |             | DEC. & VT  |          |
|-------------|-------------|------------|----------|
| date        | Apr 30 2011 | dfrq       | 499.874  |
| solvent     | CDC13       | dn         | H1       |
| file        | exp         | dpwr       | 48       |
| ACQUISITION |             | dof        | 0        |
| sfrq        | 125.707     | dm         | yyy      |
| tn          | C13         | dmm        | w        |
| at          | 1.092       | dmf        | 8929     |
| np          | 65536       | dseq       |          |
| sw          | 29996.3     | dres       | 1.0      |
| fb          | not used    | homo       | n        |
| bs          | 16          | temp       | 25.0     |
| tpwr        | 55          | DEC2       | 0        |
| pw          | 4.8         | dfrq2      | 0        |
| d1          | 0           | dn2        |          |
| tof         | 2000.0      | dpwr2      | 1        |
| nt          | 9999        | dof2       | 0        |
| ct          | 0           | dm2        | n        |
| alock       | n           | dmm2       | c        |
| gain        | not used    | dmf2       | 10000    |
| FLAGS       |             | dseq2      |          |
| il          | n           | dres2      | 1.0      |
| in          | n           | homo2      | n        |
| dp          | y           | DEC3       | 0        |
| hs          | nn          | dfrq3      | 0        |
| DISPLAY     |             | dn3        |          |
| sp          | -1097.0     | dpwr3      | 1        |
| wp          | 29995.3     | dof3       | 0        |
| vs          | 57          | dm3        | n        |
| sc          | 0           | dmm3       | c        |
| wc          | 250         | dmf3       | 10000    |
| hzmm        | 119.98      | dseq3      |          |
| is          | 500.00      | dres3      | 1.0      |
| rfl         | 10776.2     | homo3      | n        |
| rff         | 9678.3      | PROCESSING |          |
| th          | 5           | lb         | 1.00     |
| ins         | 100.000     | wfile      |          |
| nm          | cdc ph      | proc       | ft       |
|             |             | fn         | not used |
|             |             | math       | f        |
|             |             | werr       |          |
|             |             | wexp       |          |
|             |             | wbs        |          |
|             |             | wnt        |          |

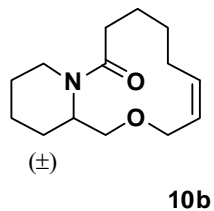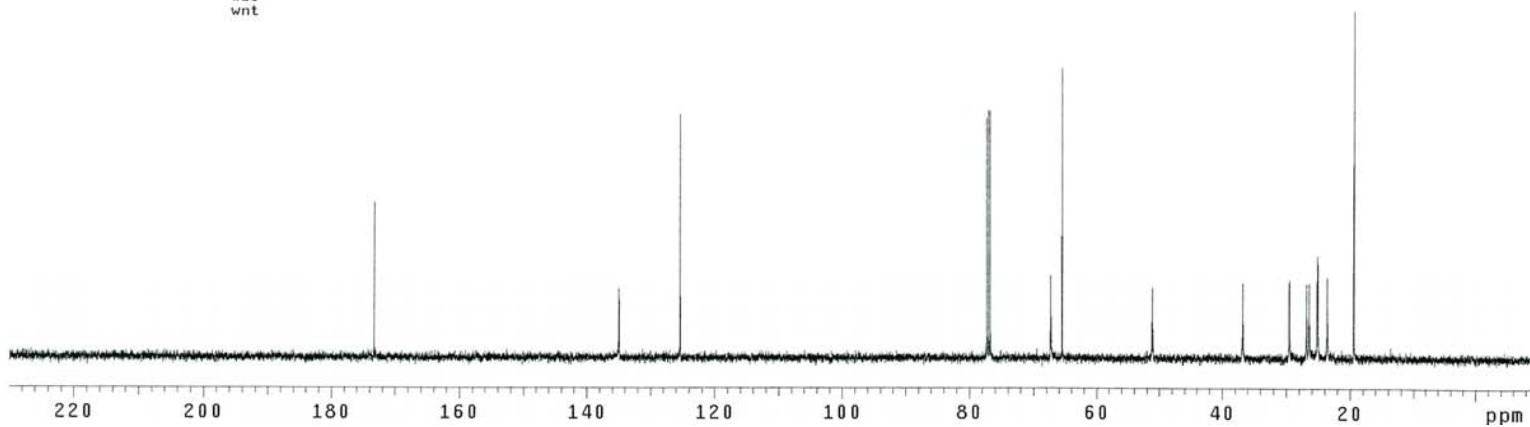

S118

WYKELN8082\_1H

exp1 s2pu1

```
SAMPLE          DEC. & VT
date Apr 24 2010 dfrq      500.176
solvent CDC13      dn       H1
file /export/home/~ dpwr    32
ds2/vnmrsys/data/i~ dof     0
500b/schreiber/VAN~ dm      nnn
G/Pub1/WYKELN8082~ dmm     c
1H.fid          dmf      3770
ACQUISITION
sfrq      500.176 dseq
tn         H1 dres      1.0
at         2.048 homo     n
np         32768 temp    25.0
sw         8000.0 lb      0.10
fb         4000 wtfile
bs         4 proc      ft
ss         2 fn        not used
tpwr      58 math      f
pw         5.0
d1         0 werr
tof        0 wexp
nt         32 wbs
ct         0 wnt      wft
alock      n
gain       not used
FLAGS
il         n
in         n
dp         y
hs        nn
DISPLAY
sp        -250.1
wp        5001.5
vs        128
sc         0
wc         250
hzmm      20.01
is        264.53
rf1       1500.1
rfp        0
th         3
ins       2.000
nm        ph
```

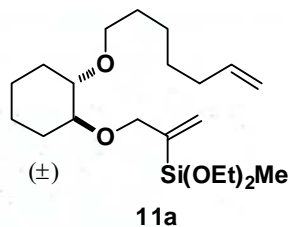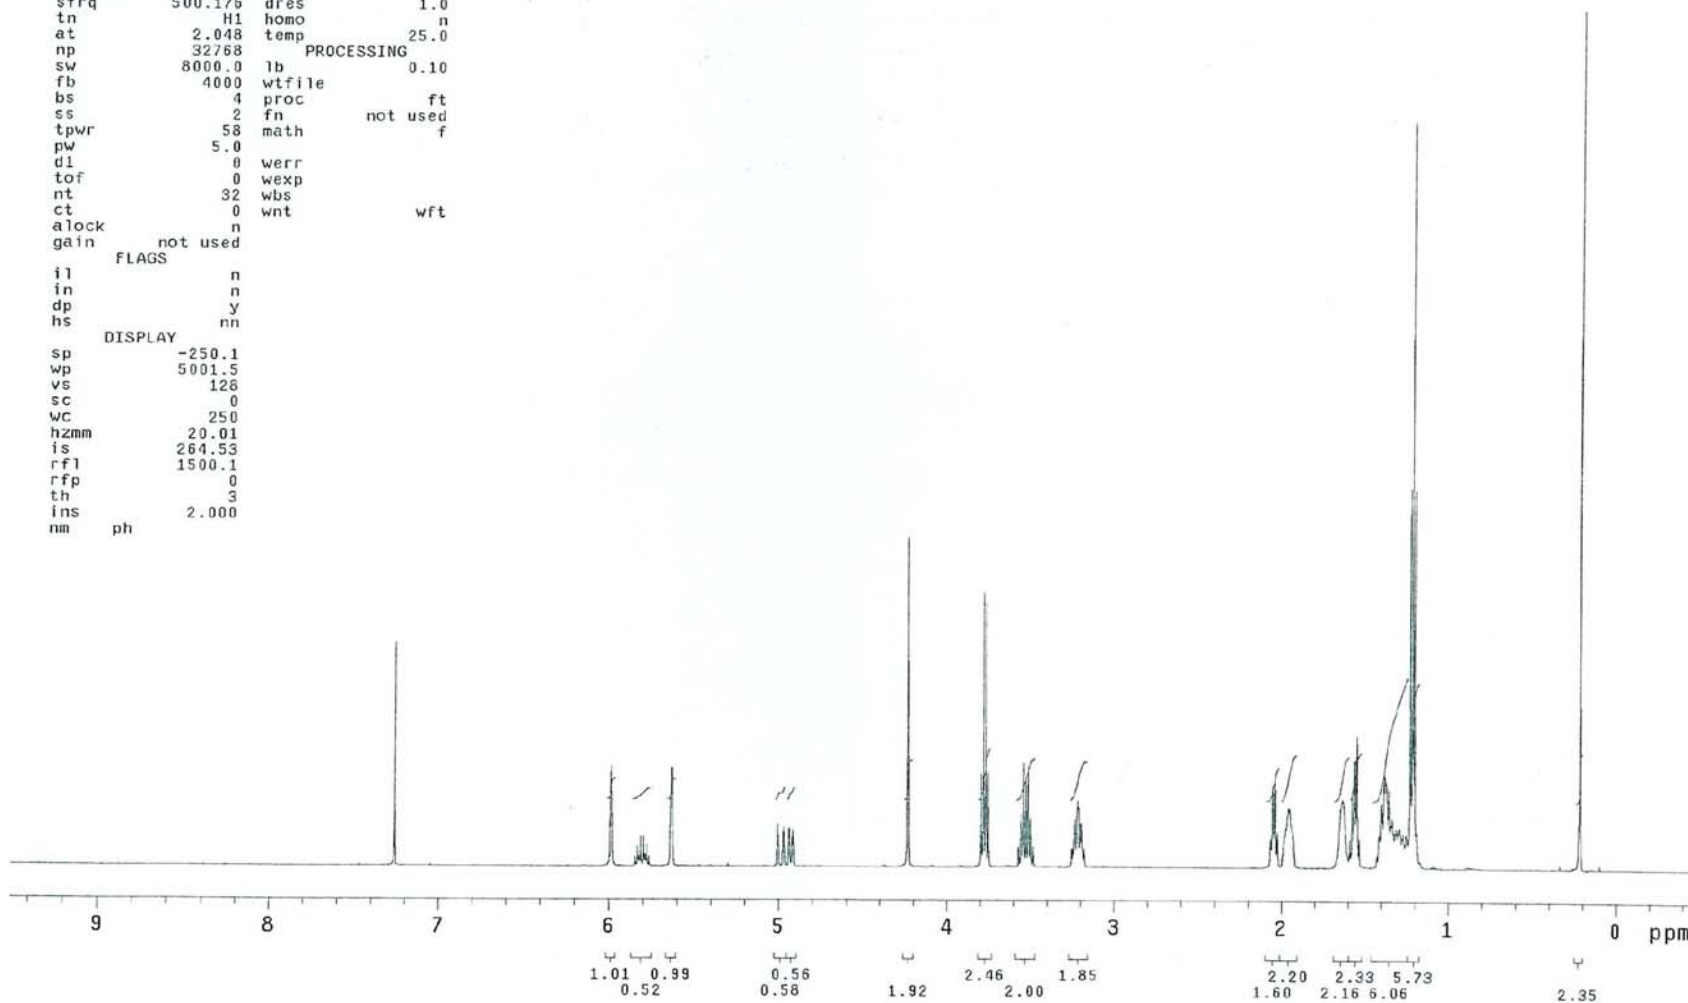

S119

WYKELN8082\_13C

exp2 s2pu1

| SAMPLE      |             | DEC. & VT  |          |
|-------------|-------------|------------|----------|
| date        | Apr 25 2010 | dfrq       | 499.874  |
| solvent     | CDC13       | dn         | H1       |
| file        | exp         | dpwr       | 48       |
| ACQUISITION |             | dof        | 0        |
| sfrq        | 125.707     | dm         | yyy      |
| tn          | C13         | dmm        | w        |
| at          | 1.092       | dmf        | 10000    |
| np          | 65536       | dseq       |          |
| sw          | 29996.3     | dres       | 1.0      |
| fb          | not used    | homo       | n        |
| bs          | 15          | temp       | 25.0     |
| tpwr        | 55          | DEC2       |          |
| pw          | 2.0         | dfrq2      | 0        |
| d1          | 0           | dn2        |          |
| tof         | 2000.0      | dpwr2      | 1        |
| nt          | 9999        | dof2       | 0        |
| ct          | 1056        | dm2        | n        |
| alock       | not used    | dmm2       | c        |
| gain        | not used    | dmf2       | 10000    |
| FLAGS       |             | dseq2      |          |
| il          | n           | dres2      | 1.0      |
| in          | n           | homo2      | n        |
| dp          | y           | DEC3       |          |
| hs          | nn          | dfrq3      | 0        |
| DISPLAY     |             | dn3        |          |
| sp          | -1087.8     | dpwr3      | 1        |
| wp          | 29995.3     | dof3       | 0        |
| vs          | 67          | dm3        | n        |
| sc          | 0           | dmm3       | c        |
| wc          | 250         | dmf3       | 10000    |
| hzmm        | 119.98      | dseq3      |          |
| is          | 500.00      | dres3      | 1.0      |
| rfl         | 1088.7      | homo3      | n        |
| rff         | 0           | PROCESSING |          |
| th          | 4           | lb         | 1.00     |
| ins         | 100.000     | wtfile     |          |
| nm          | cdc ph      | proc       | ft       |
|             |             | fn         | not used |
|             |             | math       | f        |

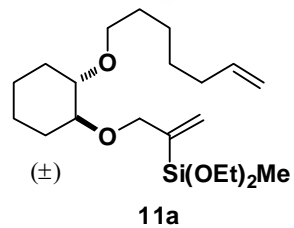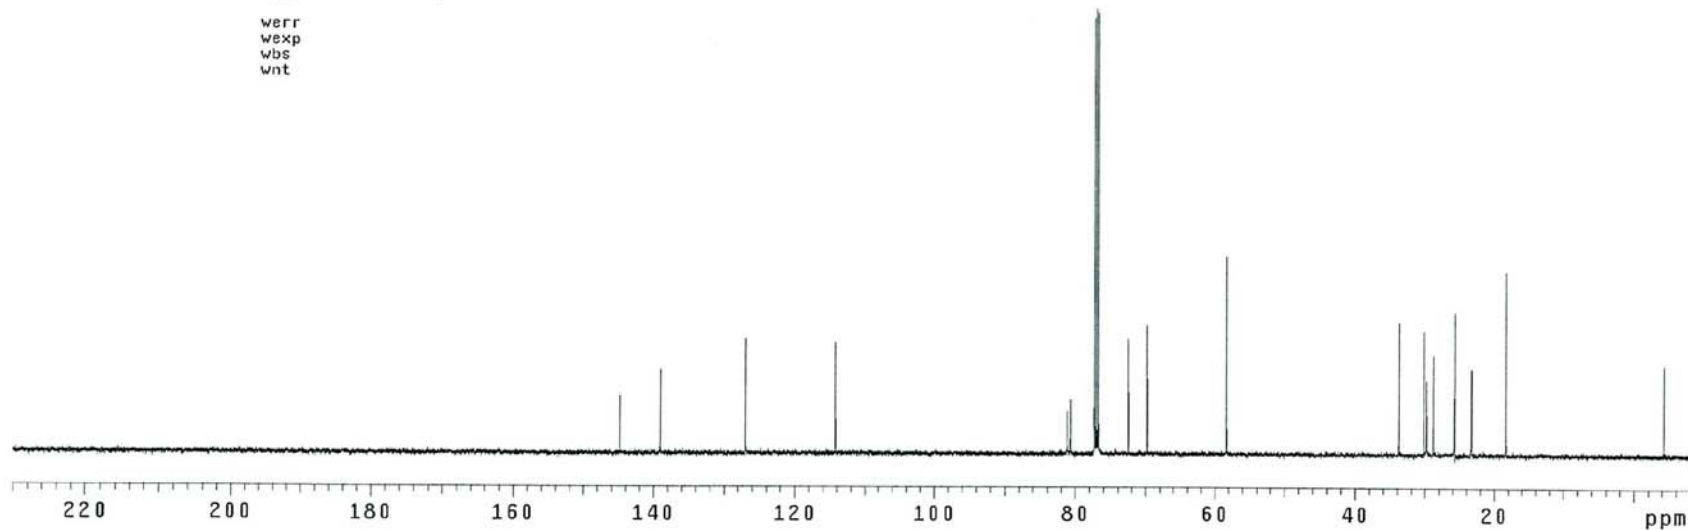

S120



WYKELN10025\_1H

exp1 s2pu1

| SAMPLE               |                | DEC. & VT  |         |
|----------------------|----------------|------------|---------|
| date                 | Apr 26 2010    | dfrq       | 499.874 |
| solvent              | CDC13          | dn         | H1      |
| file                 | /export/home/~ | dpwr       | 30      |
| ds2/vnmr/sys/data/i~ |                | dof        | 0       |
| 500c/schreiber/WAN~  |                | dm         | nnn     |
| G/Pub1/WYKELN10025~  |                | dmm        | c       |
|                      | 1H.fid         | dmf        | 200     |
| ACQUISITION          |                | PROCESSING |         |
| sfrq                 | 499.875        | dres       | 1.0     |
| tn                   | H1             | homo       | n       |
| at                   | 2.184          | temp       | 25.0    |
| np                   | 32768          |            |         |
| sw                   | 7501.2         | lb         | 1.10    |
| fb                   | not used       | wtfile     |         |
| bs                   | 4              | proc       | ft      |
| ss                   | 2              | fn         | 32768   |
| tpwr                 | 62             | math       | f       |
| pw                   | 12.0           |            |         |
| d1                   | 0              | werr       |         |
| tof                  | 800.0          | wexp       |         |
| nt                   | 32             | wbs        |         |
| ct                   | 32             | wnt        | wft     |
| alock                | n              |            |         |
| gain                 | not used       |            |         |
| FLAGS                |                |            |         |
| il                   | n              |            |         |
| in                   | n              |            |         |
| dp                   | y              |            |         |
| hs                   | nn             |            |         |
| DISPLAY              |                |            |         |
| sp                   | -250.2         |            |         |
| wp                   | 4998.6         |            |         |
| vs                   | 125            |            |         |
| sc                   | 0              |            |         |
| wc                   | 250            |            |         |
| hzmm                 | 19.99          |            |         |
| is                   | 292.42         |            |         |
| rfl                  | 4090.8         |            |         |
| rfp                  | 3629.1         |            |         |
| th                   | 2              |            |         |
| ins                  | 1.000          |            |         |
| nm                   | ph             |            |         |

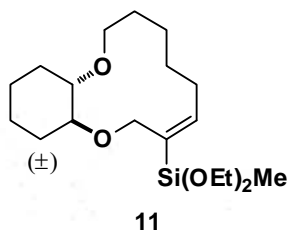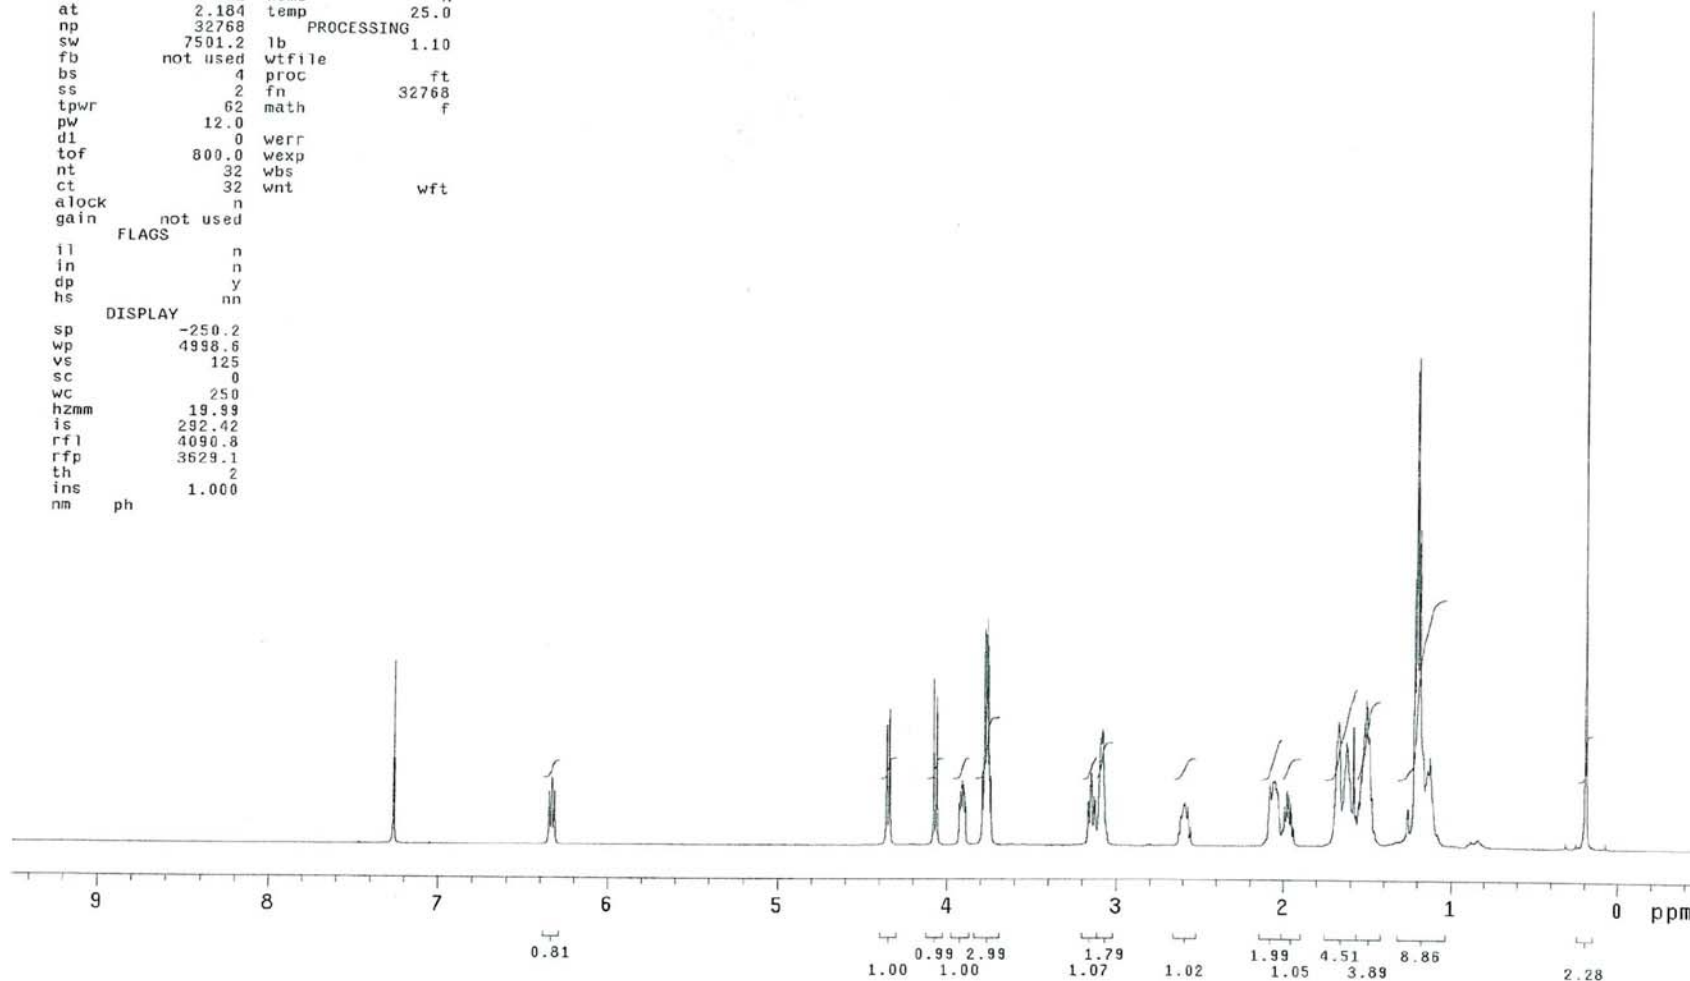

S121

WYKELN10025\_13C

exp1 s2pu1

| SAMPLE      |             | DEC. & VT  |          |
|-------------|-------------|------------|----------|
| date        | Apr 26 2010 | dfrq       | 499.874  |
| solvent     | CDC13       | dn         | H1       |
| file        | exp         | dpwr       | 48       |
| ACQUISITION |             |            |          |
| sfrq        | 125.707     | dm         | yyy      |
| tn          | C13         | dmm        | w        |
| at          | 1.092       | dmf        | 10000    |
| np          | 65536       | dseq       |          |
| sw          | 29996.3     | dres       | 1.0      |
| fb          | not used    | homo       | n        |
| bs          | 32          | temp       | 25.0     |
| tpwr        | 55          | DEC2       |          |
| pw          | 4.2         | dfrq2      | 0        |
| d1          | 0           | dn2        |          |
| tof         | 2000.0      | dpwr2      | 1        |
| nt          | 99999       | dof2       | 0        |
| ct          | 2016        | dm2        | n        |
| alock       | n           | dmm2       | c        |
| gain        | not used    | dmf2       | 10000    |
| FLAGS       |             |            |          |
| il          | n           | dseq2      |          |
| in          | n           | dres2      | 1.0      |
| dp          | n           | homo2      | n        |
| hs          | y           | DEC3       |          |
| DISPLAY     |             |            |          |
| sp          | -1086.9     | dn3        |          |
| wp          | 29995.3     | dpwr3      | 1        |
| vs          | 47          | dof3       | 0        |
| sc          | 0           | dm3        | n        |
| wc          | 250         | dmm3       | c        |
| hzmm        | 119.98      | dmf3       | 10000    |
| is          | 500.00      | dseq3      |          |
| rfl         | 10766.2     | dres3      | 1.0      |
| rfp         | 9678.3      | homo3      | n        |
| th          | 3           | PROCESSING |          |
| ins         | 100.000     | 1b         | 1.00     |
| nm          | cdc ph      | wtfile     |          |
|             |             | proc       | ft       |
|             |             | fn         | not used |
|             |             | math       | f        |
|             |             | werr       |          |
|             |             | wexp       |          |
|             |             | wbs        |          |
|             |             | wnt        |          |

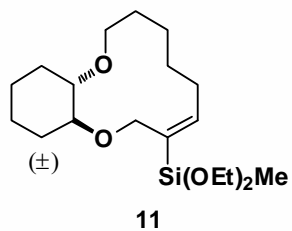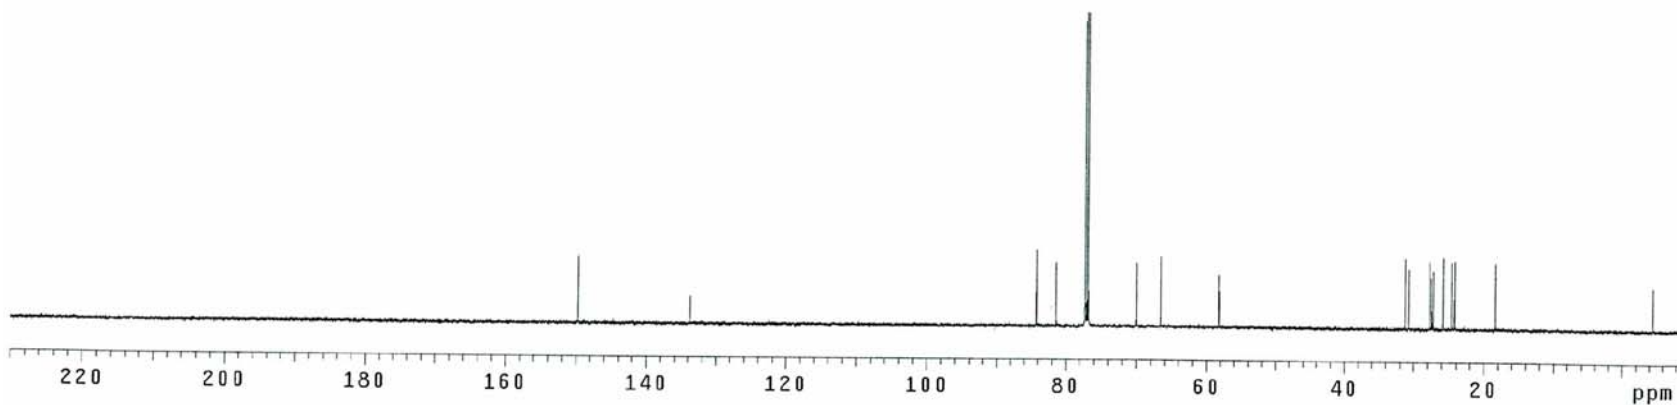

S122

WYKELN19025\_1H

exp1 s2pu1

```
SAMPLE          DEC. & VT
date Apr 30 2011 dfrq 499.874
solvent CDC13    dn H1
file exp dpwr 30
ACQUISITION    dof 9
sfrq 499.875   dm nnn
tn H1          dmm c
at 2.184       dmf 200
np 32768       dseq
sw 7501.2      dres 1.0
fb not used    homo n
bs 4           temp 25.0
ss 2           DEC2
tpwr 62        dfrq2 0
pw 12.0        dn2
dl 0           dpwr2 1
tof 800.0      dof2 0
nt 32          dm2 n
ct 0           dmm2 c
alock n        dmf2 200
gain not used  dseq2
FLAGS          dres2 1.0
il n           homo2 n
in n           DEC3
dp y           dfrq3 0
hs nn         dn3
DISPLAY        dpwr3 1
sp -250.2      dof3 0
wp 4998.6     dm3 n
vs 151        dmm3 c
sc 0          dmf3 200
wc 250        dseq3
hzmm 19.99    dres3 1.0
is 225.53     homo3 n
rf1 460.8     PROCESSING
rfp 0         lb 1.10
th 4          wtfile
ins 1.000     proc ft
nm ph        fn 32768
              math f
              werr
              wexp
              wbs
              wnt
              wft
```

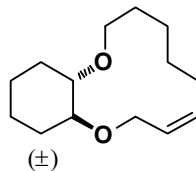

11b

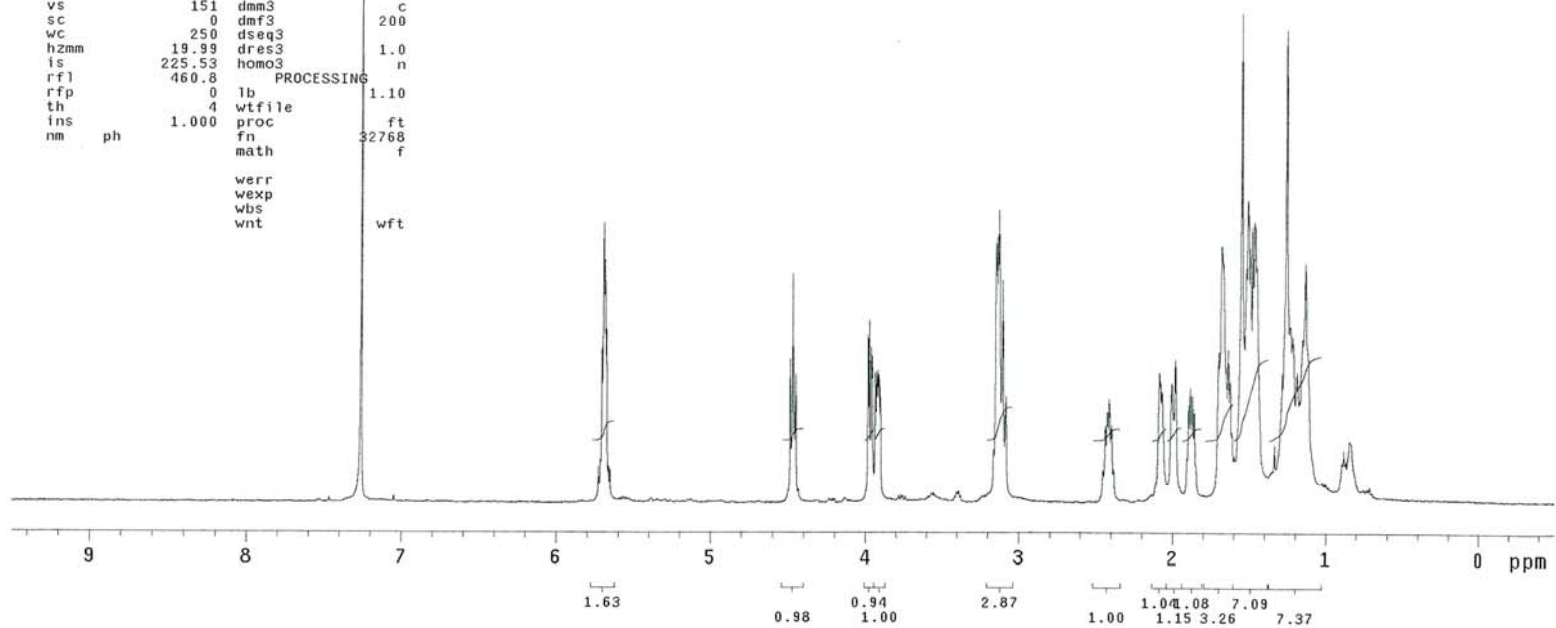

S123

WYKELN19025\_13C

exp2 s2pu1

```
SAMPLE          DEC. & VT
date Apr 30 2011 dfrq          499.874
solvent CDC13      dn          H1
file          exp  dpwr         48
ACQUISITION      dof          0
sfrq          125.707 dm          yy
tn            C13  dmm          w
at            1.092 dmf         8929
np            65536 dseq
sw            29996.3 dres        1.0
fb            not used homo       n
bs            16   temp        25.0
tpwr          55
pw            4.8  dfrq2       DEC2  0
d1            0   dn2
tof           2000.0 dpwr2       1
nt            9999  dof2
ct            0   dm2          n
alock         not used n dmm2     c
gain          not used dmf2     10000
FLAGS
il            n   dres2       1.0
in            n   homo2
dp            y   DEC3
hs            nn  dfrq3       0
DISPLAY
sp           -1095.1 dpwr3       1
wp           29995.3 dof3
vs            27   dm3          n
sc            0   dmm3         c
wc            250  dmf3         10000
hzmm         119.90 dseq3
fs            500.00 dres3     1.0
rf1           10774.4 homo3     n
rfp           9678.3 PROCESSING
th            10   lb          1.00
ins           100.000 wtfile
nm cdc ph     proc          ft
                  fn        not used
                  math       f
werr
wexp
wbs
wnt
```

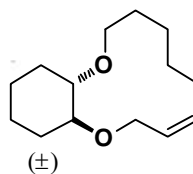

11b

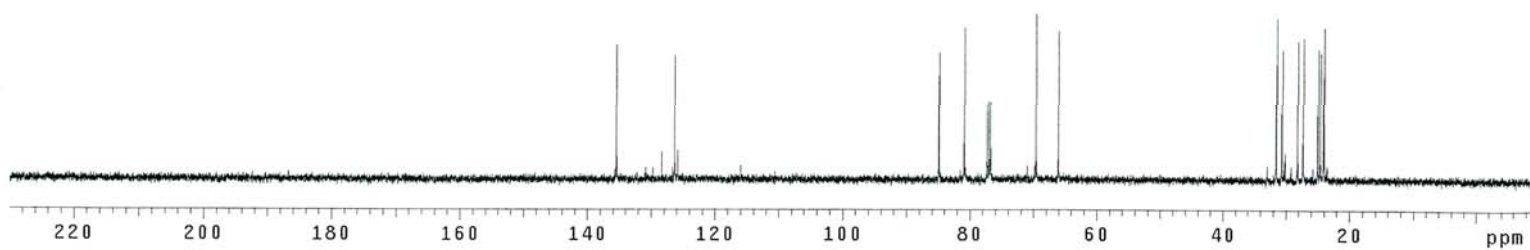

S124

WYKELN8090\_1H

expl s2pu1

```
SAMPLE          DEC. & VT
date Apr 29 2010 dfrq      499.874
solvent CDC13      dn       H1
file /export/home/~ dpwr    30
ds2/vnmrsys/data/i~ dof     0
500c/schreiber/WAN~ dm      nnn
G/Pub1/WYKELN8090_~ dmm     c
1H.fid          dmf      200
ACQUISITION     dseq
sfrq      499.875 dres    1.0
tn         H1      homo   n
at         2.184  temp   25.0
np         32768
sw         7501.2  lb     1.10
fb         not used wtfile
bs         4      proc    ft
ss         2      fn     32768
tpwr       62    math    f
pw         12.0
d1         0      werr
tof        800.0 wexp
nt         32    wbs
ct         32    wnt
alock      n
gain       not used
          FLAGS
il         n
in         n
dp         y
hs         nn
DISPLAY
sp        -250.2
wp        4998.6
vs         114
sc         0
wc         250
hzmm      19.99
is        1012.81
rfl       4089.8
rfp       3629.1
th         1
ins       1.000
nm        ph
```

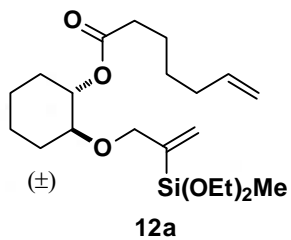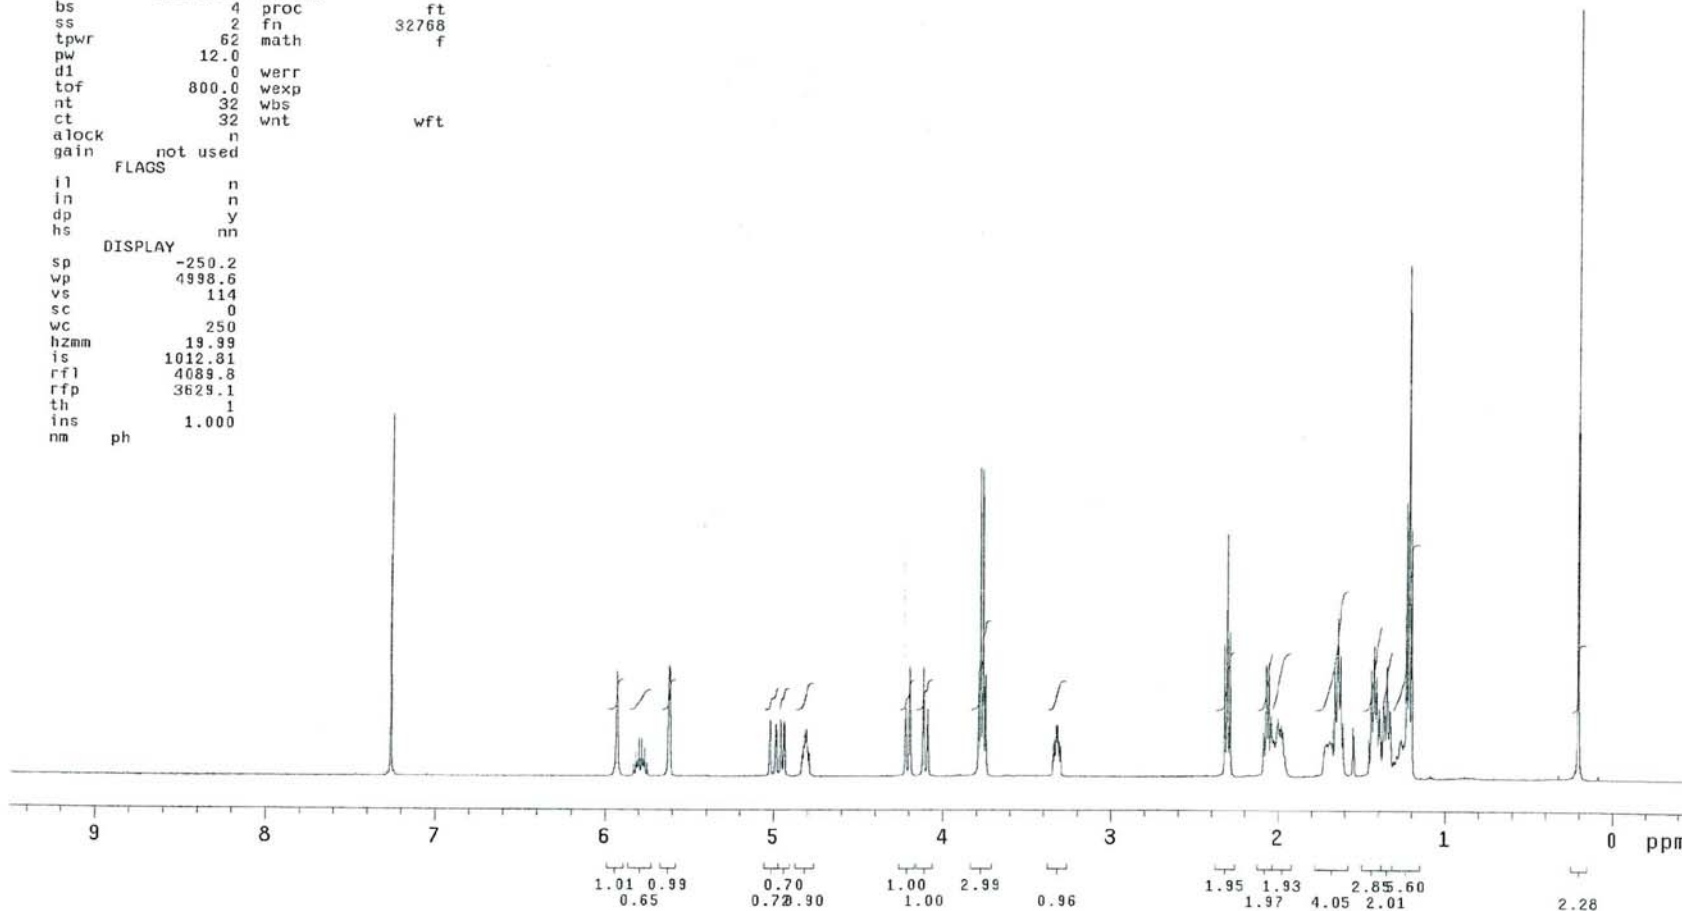

S125

WYKELN8090\_13C

exp2 s2pu1

| SAMPLE      |             | DEC. & VT |          |
|-------------|-------------|-----------|----------|
| date        | Apr 29 2010 | dfrq      | 499.874  |
| solvent     | CDC13       | dn        | H1       |
| file        | exp         | dpwr      | 48       |
|             |             | dof       | 0        |
| ACQUISITION |             |           |          |
| sfrq        | 125.707     | dm        | YYY      |
| tn          | C13         | dmm       | w        |
| at          | 1.092       | dmf       | 10000    |
| np          | 65536       | dseq      |          |
| sw          | 29996.3     | dres      | 1.0      |
| fb          | not used    | homo      | n        |
| bs          | 32          | temp      | 25.0     |
| tpwr        | 55          |           | DEC2     |
| pw          | 4.2         | dfrq2     | 0        |
| d1          | 0           | dn2       |          |
| tof         | 2000.0      | dpwr2     | 1        |
| nt          | 99999       | dof2      | 0        |
| ct          | 1280        | dm2       | n        |
| alock       | n           | dmm2      | c        |
| gain        | not used    | dmf2      | 10000    |
| FLAGS       |             |           |          |
| il          | n           | dseq2     |          |
| in          | n           | dres2     | 1.0      |
| dp          | y           | homo2     | n        |
| hs          | nn          |           | DEC3     |
|             |             | dfrq3     | 0        |
| DISPLAY     |             |           |          |
| sp          | -1087.8     | dn3       |          |
| wp          | 29995.3     | dpwr3     | 1        |
| vs          | 27          | dof3      | 0        |
| sc          | 0           | dm3       | n        |
| wc          | 250         | dmm3      | c        |
| hzmm        | 119.98      | dmf3      | 10000    |
| is          | 500.00      | dseq3     |          |
| rfl         | 10767.1     | dres3     | 1.0      |
| rfp         | 9678.3      | homo3     | n        |
| PROCESSING  |             |           |          |
| th          | 3           | lb        | 1.00     |
| ins         | 100.000     | wfile     |          |
| nm          | cdc ph      | proc      | ft       |
|             |             | fn        | not used |
|             |             | math      | f        |
|             |             | werr      |          |
|             |             | wexp      |          |
|             |             | wbs       |          |
|             |             | wnt       |          |

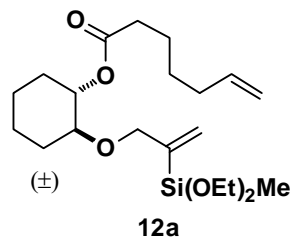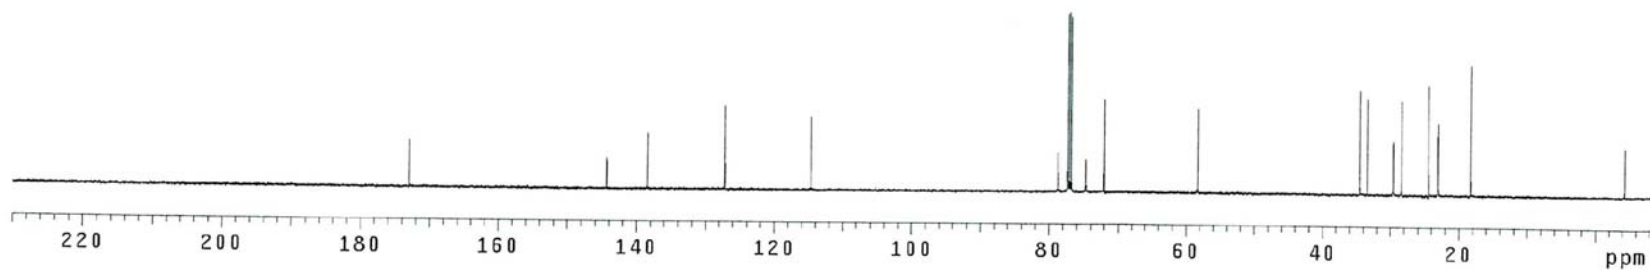

S126

WYKELN10033\_1H

exp1 s2pu1

```
SAMPLE          DEC. & VT
date   Apr 30 2010  dfrq   499.874
solvent CDC13      dn      H1
file   /export/home/~ dpwr   30
ds2/vnmrsys/data/i~ dof    0
500c/schreiber/WAN~ dm     nnn
G/Pub1/WYKELN10033~ dmm    c
              _1H.fid  dmf   200
ACQUISITION
sfrq   499.875  dseq   1.0
tn     H1      homo   n
at     2.184   temp   25.0
np     32768
sw     7501.2  lb      1.10
fb     not used wtfile
bs     4      proc   ft
ss     2      fn     32768
tpwr   62    math   f
pw     12.0
d1     0     werr
tof    800.0 wexp
nt     32    wbs
ct     32    wnt
alock  n
gain   not used wft
      FLAGS
il     n
in     n
dp     y
hs     nn
DISPLAY
sp     -250.2
wp     4998.6
vs     151
sc     0
wc     250
hzmm   19.99
is     299.18
rfl    4089.8
rfp    3629.1
lh     3
ins    1.000
nm     ph
```

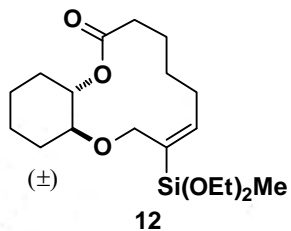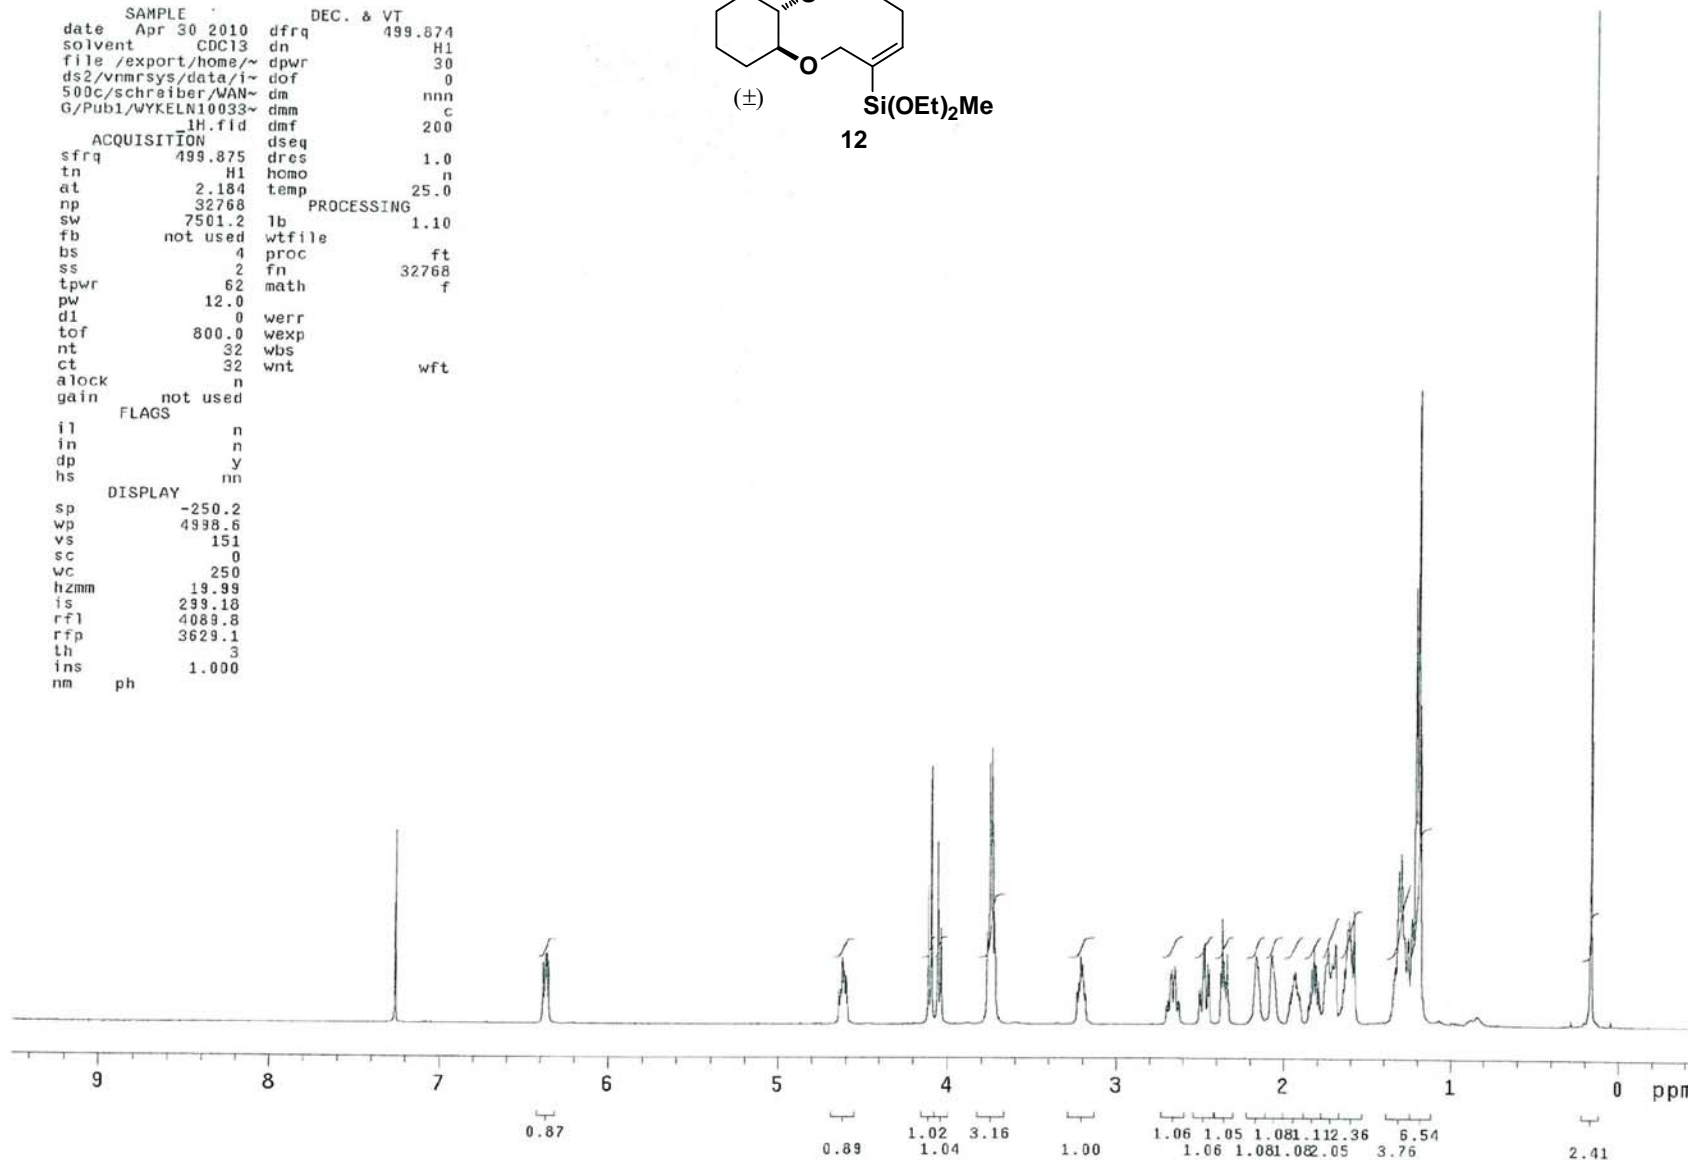

S127

WYKELN10033\_13C

exp3 s2pu1

| SAMPLE      |             | DEC. & VT  |          |
|-------------|-------------|------------|----------|
| date        | Apr 30 2010 | dfrq       | 499.874  |
| solvent     | CDC13       | dn         | H1       |
| file        | exp         | dpwr       | 48       |
| ACQUISITION |             |            |          |
| sfrq        | 125.707     | dm         | yyy      |
| tn          | C13         | dmm        | w        |
| at          | 1.092       | dmf        | 10000    |
| np          | 65536       | dseq       |          |
| sw          | 29996.3     | dres       | 1.0      |
| fb          | not used    | homo       | n        |
| bs          | 32          | temp       | 25.0     |
| tpwr        | 55          | DEC2       |          |
| pw          | 4.2         | dfrq2      | 0        |
| d1          | 0           | dn2        |          |
| tof         | 2000.0      | dpwr2      | 1        |
| nt          | 99999       | dof2       | 0        |
| ct          | 800         | dm2        | n        |
| alock       | not used    | dmm2       | c        |
| gain        | not used    | dmf2       | 10000    |
| FLAGS       |             |            |          |
| il          | n           | dres2      | 1.0      |
| in          | n           | homo2      | n        |
| dp          | y           | DEC3       |          |
| hs          | nn          | dfrq3      | 0        |
| DISPLAY     |             |            |          |
| sp          | -1087.8     | dn3        |          |
| wp          | 29995.3     | dpwr3      | 1        |
| vs          | 25          | dof3       | 0        |
| sc          | 0           | dm3        | n        |
| wc          | 250         | dmm3       | c        |
| hzmm        | 119.98      | dmf3       | 10000    |
| is          | 500.00      | dseq3      |          |
| rfl         | 10767.1     | dres3      | 1.0      |
| rff         | 9678.3      | homo3      | n        |
| th          | 3           | PROCESSING |          |
| ins         | 100.000     | lb         | 1.00     |
| nm          | cdc ph      | wfile      |          |
|             |             | proc       | ft       |
|             |             | fn         | not used |
|             |             | math       | f        |
|             |             | werr       |          |
|             |             | wexp       |          |
|             |             | wbs        |          |
|             |             | wnt        |          |

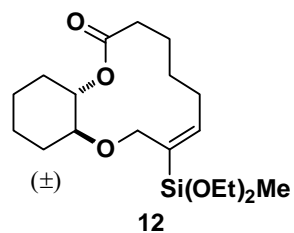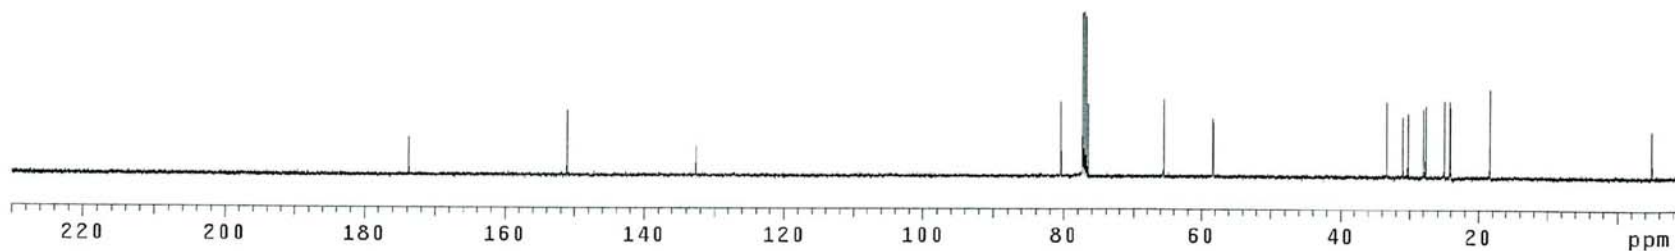

S128



WYKELN19033\_1H

exp1 s2pu1

| SAMPLE      |             | DEC. & VT  |         |
|-------------|-------------|------------|---------|
| date        | Apr 30 2011 | dfrq       | 499.874 |
| solvent     | CDC13       | dn         | H1      |
| file        | exp         | dpwr       | 30      |
| ACQUISITION |             | dof        | 0       |
| sfrq        | 499.875     | dm         | nmn     |
| tn          | H1          | dmm        | c       |
| at          | 2.184       | dmf        | 200     |
| np          | 32768       | dseq       |         |
| sw          | 7501.2      | dres       | 1.0     |
| fb          | not used    | homo       | n       |
| bs          | 4           | temp       | 25.0    |
| ss          | 2           |            |         |
| tpwr        | 62          | DEC2       | 0       |
| pw          | 12.0        | dn2        |         |
| d1          | 0           | dpwr2      | 1       |
| tof         | 800.0       | dof2       | 0       |
| nt          | 16          | dm2        | n       |
| ct          | 0           | dmm2       | c       |
| alock       | n           | dmf2       | 200     |
| gain        | not used    | dseq2      |         |
|             | FLAGS       | dres2      | 1.0     |
| il          | n           | homo2      | n       |
| in          | n           |            |         |
| dp          | y           | DEC3       | 0       |
| hs          | nn          | dfrq3      |         |
|             |             | dn3        |         |
|             | DISPLAY     | dpwr3      | 1       |
| sp          | -250.2      | dof3       | 0       |
| wp          | 4998.6      | dm3        | n       |
| vs          | 151         | dmm3       | c       |
| sc          | 0           | dmf3       | 200     |
| wc          | 250         | dseq3      |         |
| hzmm        | 19.99       | dres3      | 1.0     |
| is          | 239.65      | homo3      | n       |
| rf1         | 460.8       |            |         |
| rpf         | 0           | PROCESSING | 1.10    |
| th          | 2           | lb         |         |
| ins         | 1.000       | wfile      |         |
| nm          | ph          | proc       | ft      |
|             |             | fn         | 32768   |
|             |             | math       | f       |
|             |             | werr       |         |
|             |             | wexp       |         |
|             |             | wbs        |         |
|             |             | wnt        | wft     |

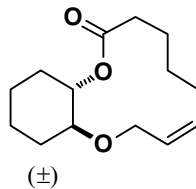

12b

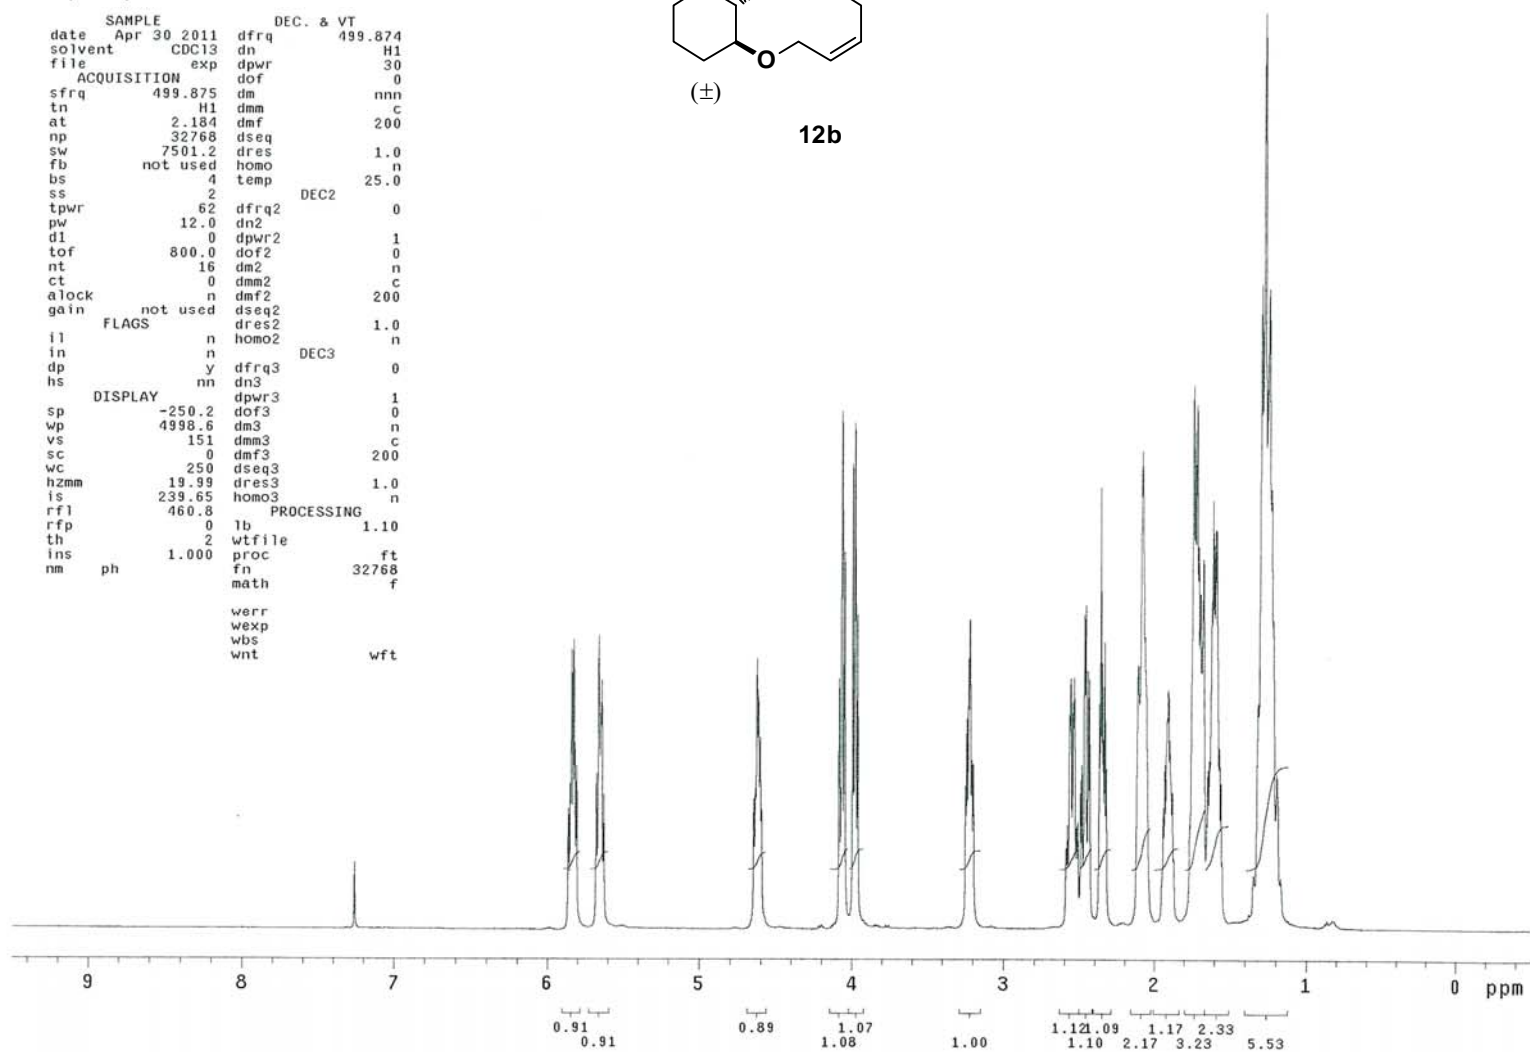

WYKELN19033\_13C

exp2 s2pu1

```

SAMPLE          DEC. & VT
date   Apr 30 2011  dfrq          499.874
solvent CDC13      dn           H1
file    exp       dpwr          48
ACQUISITION    dof           0
sfrq     125.707  dm            yyy
tn       C13      dmm           w
at       1.092   dmf          8929
np       65536   dseq
sw       29996.3 dres          1.0
fb       not used homo         n
bs       16     temp          25.0
tpwr     55     DEC2
pw       4.8    dfrq2         0
d1       0     dn2
tof     2000.0  dpwr2         1
nt     9999    dof2         0
ct       0     dm2           n
alock   not used dmm2         c
gain    not used dmf2        10000
        FLAGS   dseq2
i1      n      dres2         1.0
in      n      homo2         n
dp      y      DEC3
hs      nn     dfrq3         0
        DISPLAY dn3
sp     -1092.4  dpwr3         1
wp     29995.3 dof3         0
vs     27     dm3           n
sc     0     dmm3         c
wc     250    dmf3        10000
hzmm   119.98 dseq3
ts     500.00 dres3         1.0
rfl    10771.7 homo3         n
rfp    9678.3  PROCESSING
th     4     lb           1.00
ins    100.000 wfile
nm cdc ph   proc          ft
           fn          not used
           math         f
           werr
           wexp
           wbs
           wnt

```

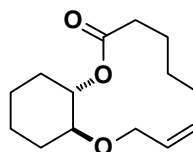

(±)

12b

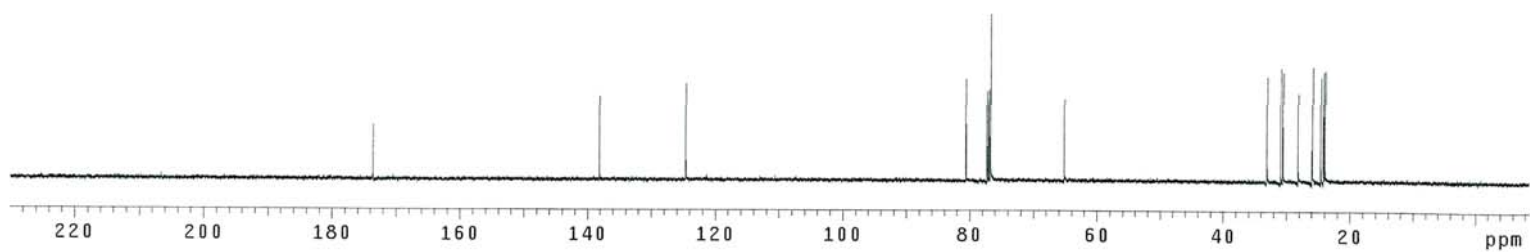

S130

WYKELN8088\_1H

exp1 s2pu1

```
SAMPLE          DEC. & VT
date Apr 28 2010 dfrq      499.874
solvent CDC13     dn        H1
file /export/home/~ dpwr      30
ds2/vnmrsys/data/i~ dof       0
500c/schreiber/WAN~ dm        nnn
G/Pub1/WYKELN8088_~ dmm       c
1H.fid          dmf       200
ACQUISITION
sfrq      499.875 dres      1.0
tn         H1     homo      n
at         2.184  temp     25.0
np         32768
sw         7501.2  lb       1.10
fb         not used wfile
bs         4      proc      ft
ss         2      fn       32768
tpwr      62     math      f
pw         12.0
d1         0     verr
tof        800.0 wexp
nt         32   wbs
ct         32   wnt
alock      n
gain       not used
FLAGS
il         n
in         n
dp         y
hs         nn
DISPLAY
sp         -250.2
wp         4998.6
vs         151
sc         0
wc         250
hzmm      19.99
is         368.14
rfl       4090.8
rfp       3629.1
th         3
ins       2.000
nm        ph
```

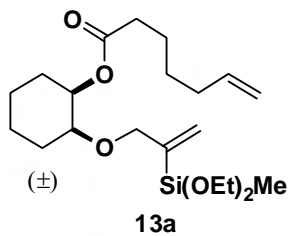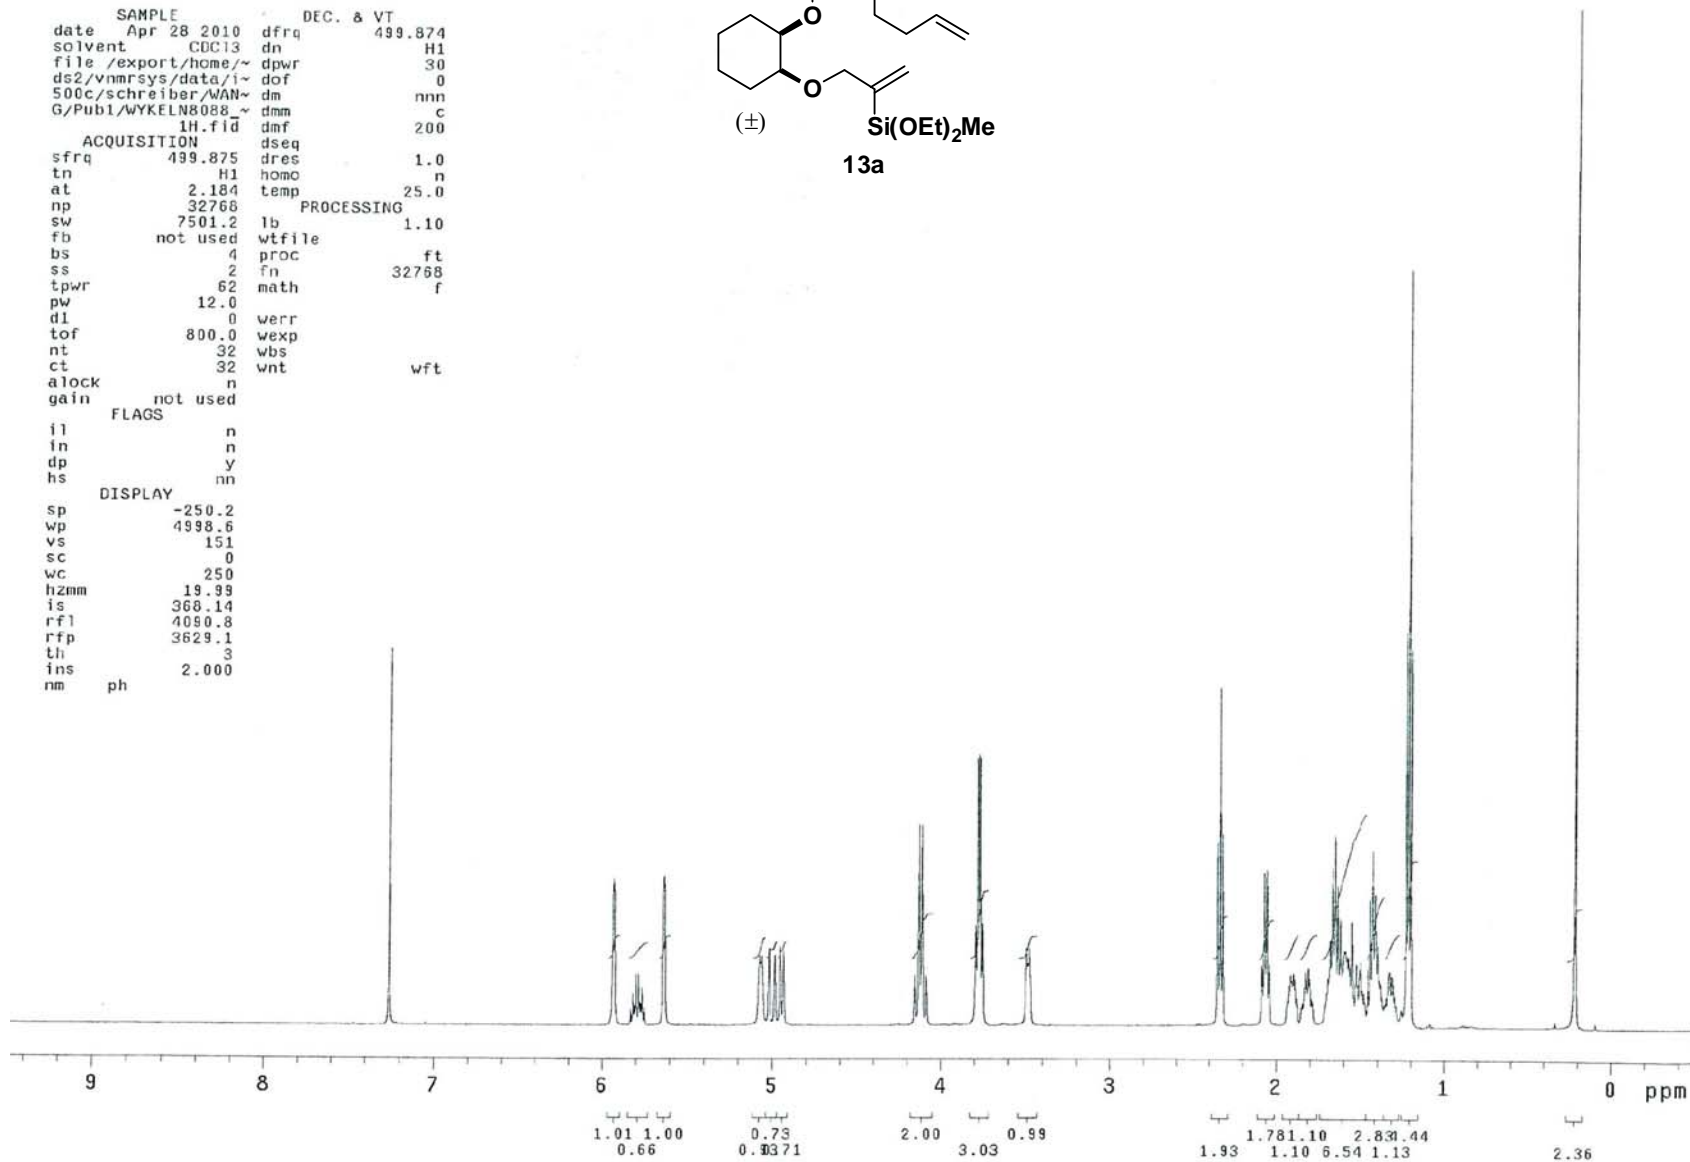

S131

WYKELN8088\_13C

exp3 s2pu1

| SAMPLE      |             | DEC. & VT  |          |
|-------------|-------------|------------|----------|
| date        | Apr 28 2010 | dfrq       | 499.874  |
| solvent     | CDC13       | dn         | H1       |
| file        | exp         | dpwr       | 48       |
| ACQUISITION |             |            |          |
| sfrq        | 125.707     | dm         | YYY      |
| tn          | C13         | dmm        | w        |
| at          | 1.092       | dmf        | 10000    |
| np          | 65536       | dseq       |          |
| sw          | 29996.3     | dres       | 1.0      |
| fb          | not used    | homo       | n        |
| bs          | 32          | temp       | 25.0     |
| tpwr        | 55          | DEC2       |          |
| pw          | 4.2         | dfrq2      | 0        |
| d1          | 0           | dn2        |          |
| tof         | 2000.0      | dpwr2      | 1        |
| nt          | 99999       | dof2       | 0        |
| ct          | 736         | dm2        | n        |
| alock       | n           | dmm2       | c        |
| gain        | not used    | dmf2       | 10000    |
| FLAGS       |             |            |          |
| fl          | n           | dseq2      |          |
| in          | n           | dres2      | 1.0      |
| dp          | y           | homo2      | n        |
| hs          | nn          | DEC3       |          |
| DISPLAY     |             |            |          |
| sp          | -1087.8     | dfrq3      | 0        |
| wp          | 29995.3     | dn3        |          |
| vs          | 37          | dpwr3      | 1        |
| sc          | 0           | dof3       | 0        |
| wc          | 250         | dm3        | n        |
| hzmm        | 119.98      | dmm3       | c        |
| is          | 500.00      | dmf3       | 10000    |
| rfl         | 1088.7      | dseq3      |          |
| rff         | 0           | dres3      | 1.0      |
| th          | 2           | homo3      | n        |
| ins         | 100.000     | PROCESSING |          |
| nm          | cdc ph      | 1b         | 1.00     |
|             |             | wfile      |          |
|             |             | proc       | ft       |
|             |             | fn         | not used |
|             |             | math       | f        |
|             |             | werr       |          |
|             |             | wexp       |          |
|             |             | wbs        |          |
|             |             | wnt        |          |

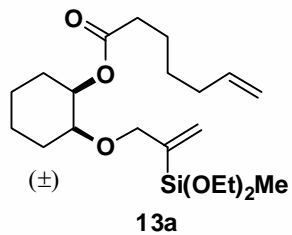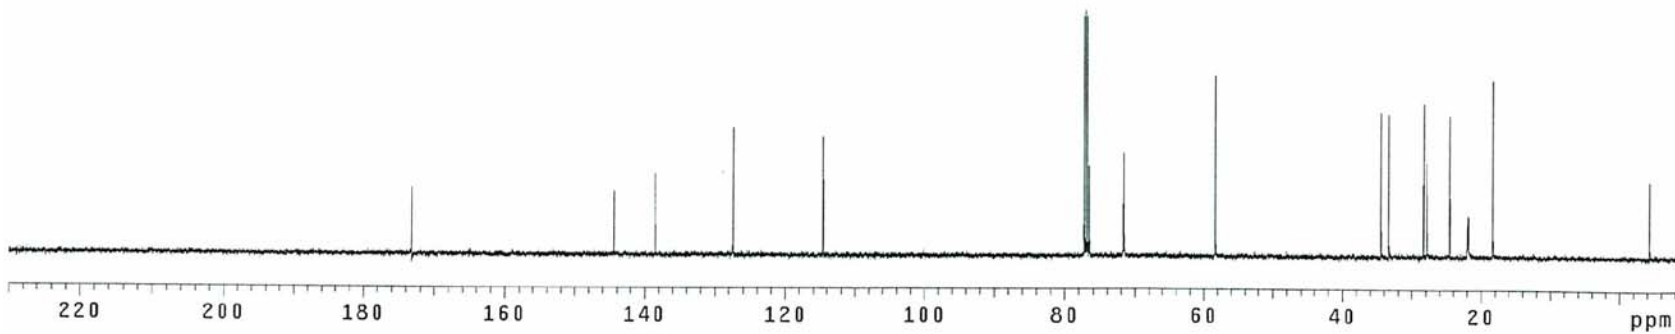

S132

WYKELN10031\_1H

expl s2pu1

```
SAMPLE          DEC. & VT
date Apr 30 2010 dfrq      499.874
solvent CDC13      dn       H1
file /export/home/~ dpwr     30
ds2/vnmrcys/data/1~ dof      0
500c/schreiber/WAN~ dm       nnn
G/Pub1/WYKELN10031~ dmm      c
                    1H.fid    dmf     200
ACQUISITION      dseq
sfrq      499.875 dres     1.0
tn         H1      homo     n
at         2.184   temp     25.0
np         32768
sw         7501.2 lb       1.10
fb         not used wfile
bs         4       proc     ft
ss         2       fn       32768
tpwr      62      math     f
pw         12.0
d1         0       werr
tof        800.0 wexp
nt         32     wbs
ct         32     wnt
alock      n
gain       not used
          FLAGS
il         n
in         n
dp         y
hs         nn
          DISPLAY
sp         -250.2
wp         4998.6
vs         130
sc         0
wc         250
hzmm      19.99
is         434.36
rfl       4088.8
rfp       3629.1
th         7
ins       100.000
nm        ph
```

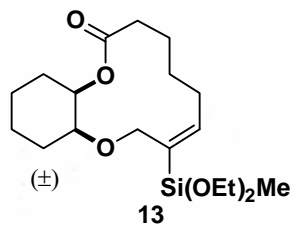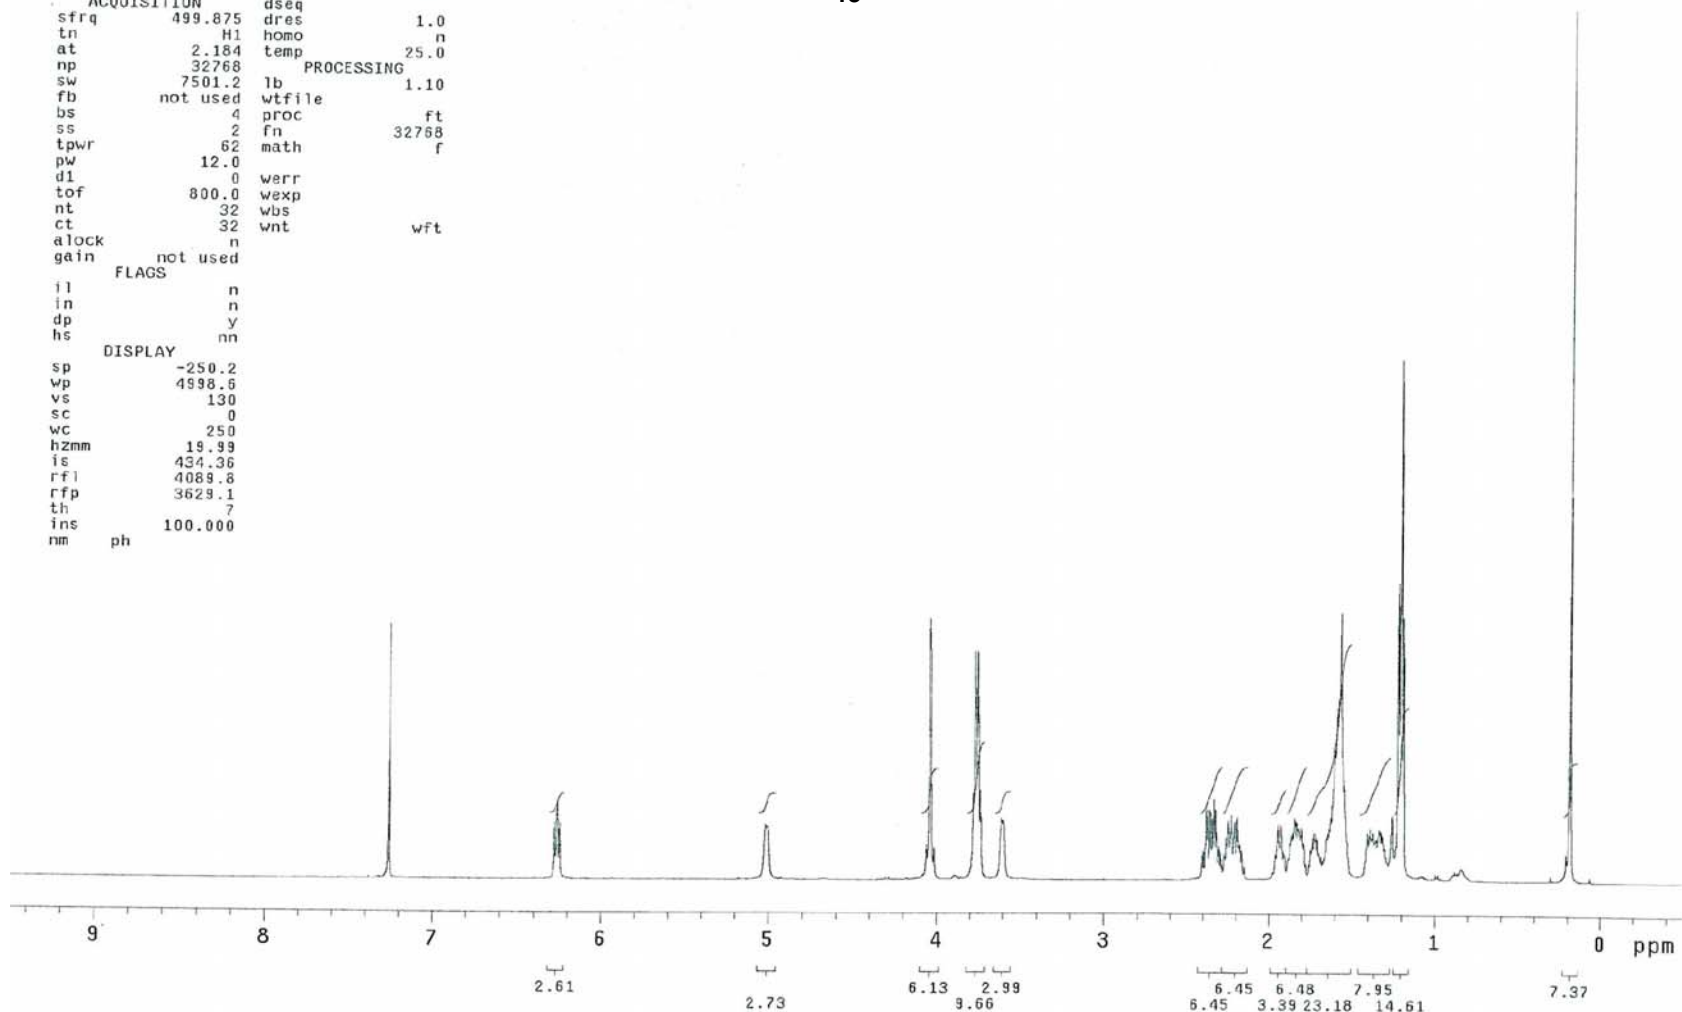

S133

WYKELN10031\_13C

exp3 s2pu1

| SAMPLE      |             | DEC. & VT  |          |
|-------------|-------------|------------|----------|
| date        | Apr 30 2010 | dfrq       | 499.874  |
| solvent     | CDC13       | dn         | H1       |
| file        | exp         | dpwr       | 48       |
| ACQUISITION |             | dof        | 0        |
| sfrq        | 125.707     | dm         | YY       |
| tn          | C13         | dmm        | w        |
| at          | 1.092       | dmf        | 10000    |
| np          | 65536       | dseq       |          |
| sw          | 29996.3     | dres       | 1.0      |
| fb          | not used    | homo       | n        |
| bs          | 32          | temp       | 25.0     |
| tpwr        | 55          | DEC2       |          |
| pw          | 4.2         | dfrq2      | 0        |
| d1          | 0           | dn2        |          |
| tof         | 2000.0      | dpwr2      | 1        |
| nt          | 99999       | dof2       | 0        |
| ct          | 1856        | dm2        | n        |
| alock       | not used    | dmm2       | c        |
| gain        | not used    | dmf2       | 10000    |
| FLAGS       |             | dseq2      |          |
| il          | n           | dres2      | 1.0      |
| in          | n           | homo2      | n        |
| dp          | y           | DEC3       |          |
| hs          | nn          | dfrq3      | 0        |
| DISPLAY     |             | dn3        |          |
| sp          | -1086.9     | dpwr3      | 1        |
| wp          | 29995.3     | dof3       | 0        |
| vs          | 60          | dm3        | n        |
| sc          | 0           | dmm3       | c        |
| wc          | 250         | dmf3       | 10000    |
| hzmm        | 119.98      | dseq3      |          |
| is          | 500.00      | dres3      | 1.0      |
| rfl         | 1087.8      | homo3      | n        |
| rff         | 0           | PROCESSING |          |
| th          | 2           | lb         | 1.00     |
| ins         | 100.000     | wtfile     |          |
| nm          | cdc ph      | proc       | ft       |
|             |             | fn         | not used |
|             |             | math       | f        |
|             |             | werr       |          |
|             |             | wexp       |          |
|             |             | wbs        |          |
|             |             | wnt        |          |

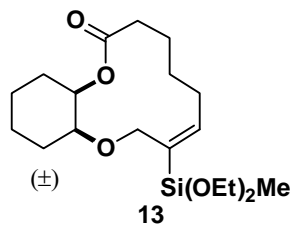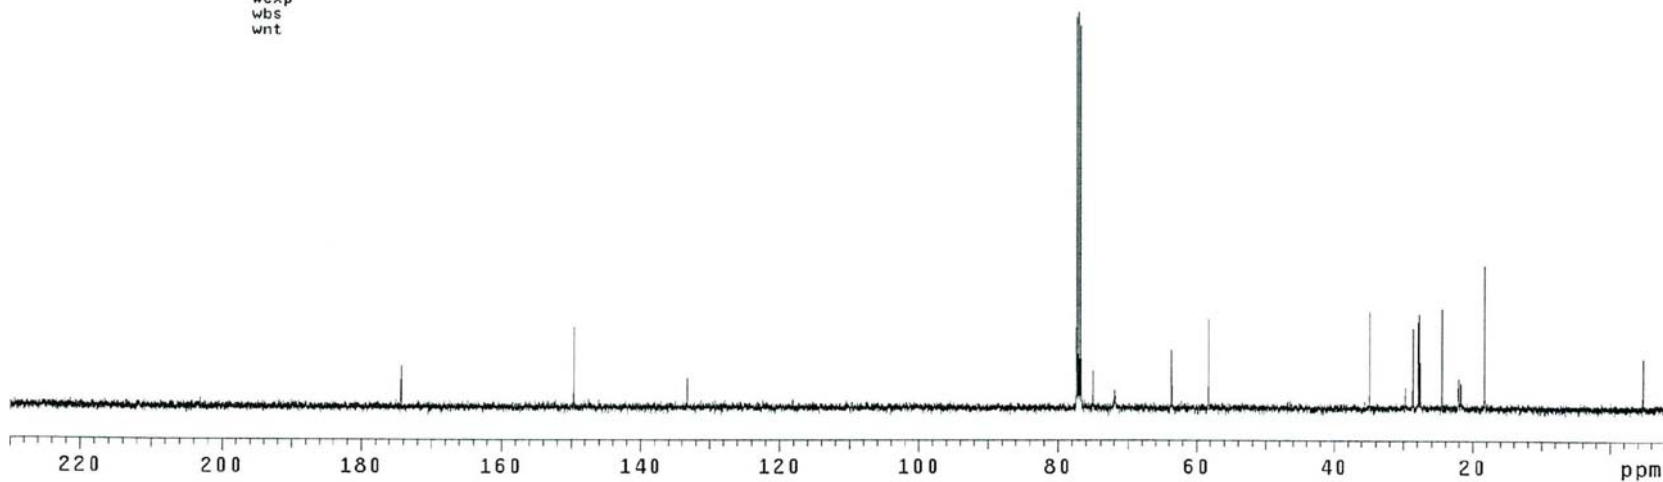

S134

WYKELN19030\_1H

expl s2pul

```
SAMPLE          DEC. & VT
date Apr 30 2011 dfrq          499.874
solvent CDC13      dn          H1
file      exp      dpwr         30
ACQUISITION     dof          0
sfrq 499.875      dm          nnn
tn    H1          dmm          c
at    2.184       dmf          200
np    32768       dseq          1.0
sw    7501.2      dres          n
fb    not used    homo          n
bs    4           temp         25.0
ss    2           DEC2          0
tpwr  62          dfrq2         0
pw    12.0        dn2           1
d1    0           dpwr2         0
tof   800.0       dof2          0
nt    16          dm2           n
ct    0           dmm2          c
alock n           dmf2          200
gain  not used    dseq2         1.0
FLAGS n          dres2         n
il    n           homo2         0
in    n           DEC3          0
dp    y           dfrq3         0
hs    nn          dn3           1
DISPLAY          dpwr3         1
sp    -250.2      dof3          0
wp    4998.6      dm3           n
vs    105         dmm3          c
sc    0           dmf3          200
wc    250         dseq3         1.0
hzmm  19.99      dres3         n
is    706.01     homo3         n
rfl   460.8      PROCESSING
rfp   0          lb           1.10
th    5          wtfile
ins   1.000      proc         ft
nm    ph         fn           32768
                        math          f
                        werr
                        wexp
                        wbs
                        wnt
                        wft
```

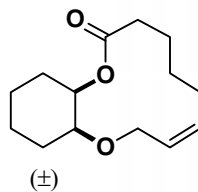

13b

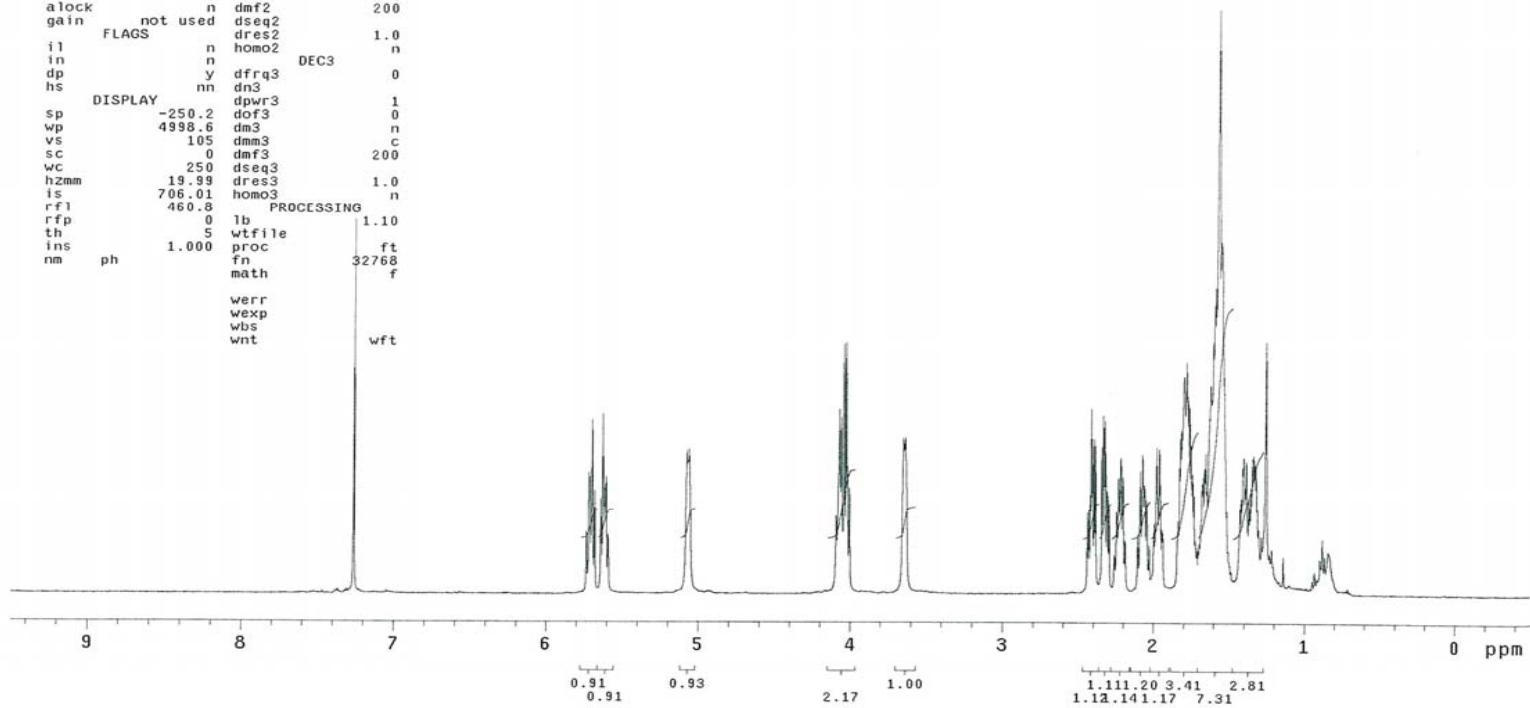

WYKELN19030\_13C

exp2 s2pu1

```
SAMPLE          DEC. & VT
date Apr 30 2011 dfrq          499.874
solvent CDC13    dn            H1
file exp        dpwr          48
ACQUISITION    dof            0
sfrq 125.707    dm            YY
tn C13          dmm           W
at 1.092        dmf           8929
np 65536        dseq
sw 29996.3      dres           1.0
fb not used     homo
bs 16          temp           25.0
tpwr 55        DEC2
pw 4.8         dfrq2          0
d1 0           dn2
tof 2000.0     dpwr2          1
nt 9999        dof2           0
ct 0           dm2            n
alock not used  dmm2           c
gain not used  dmf2           10000
FLAGS          dseq2
il n           dres2          1.0
in n           homo2         n
dp y           DEC3
hs nn          dfrq3          0
DISPLAY        dn3
sp -1086.9     dpwr3          1
wp 29995.3    dof3           0
vs 294        dm3            n
sc 0          dmm3           c
wc 250        dmf3           10000
hzmm 119.98   dseq3
is 500.00     dres3          1.0
rfl 10766.2   homo3          n
rfp 9678.3    PROCESSING
th 6          lb            1.00
ins 100.000   wtfile
nm cdc ph    proc          ft
              fn          not used
              math         f
              werr
              wexp
              wbs
              wnt
```

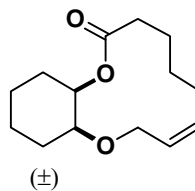

13b

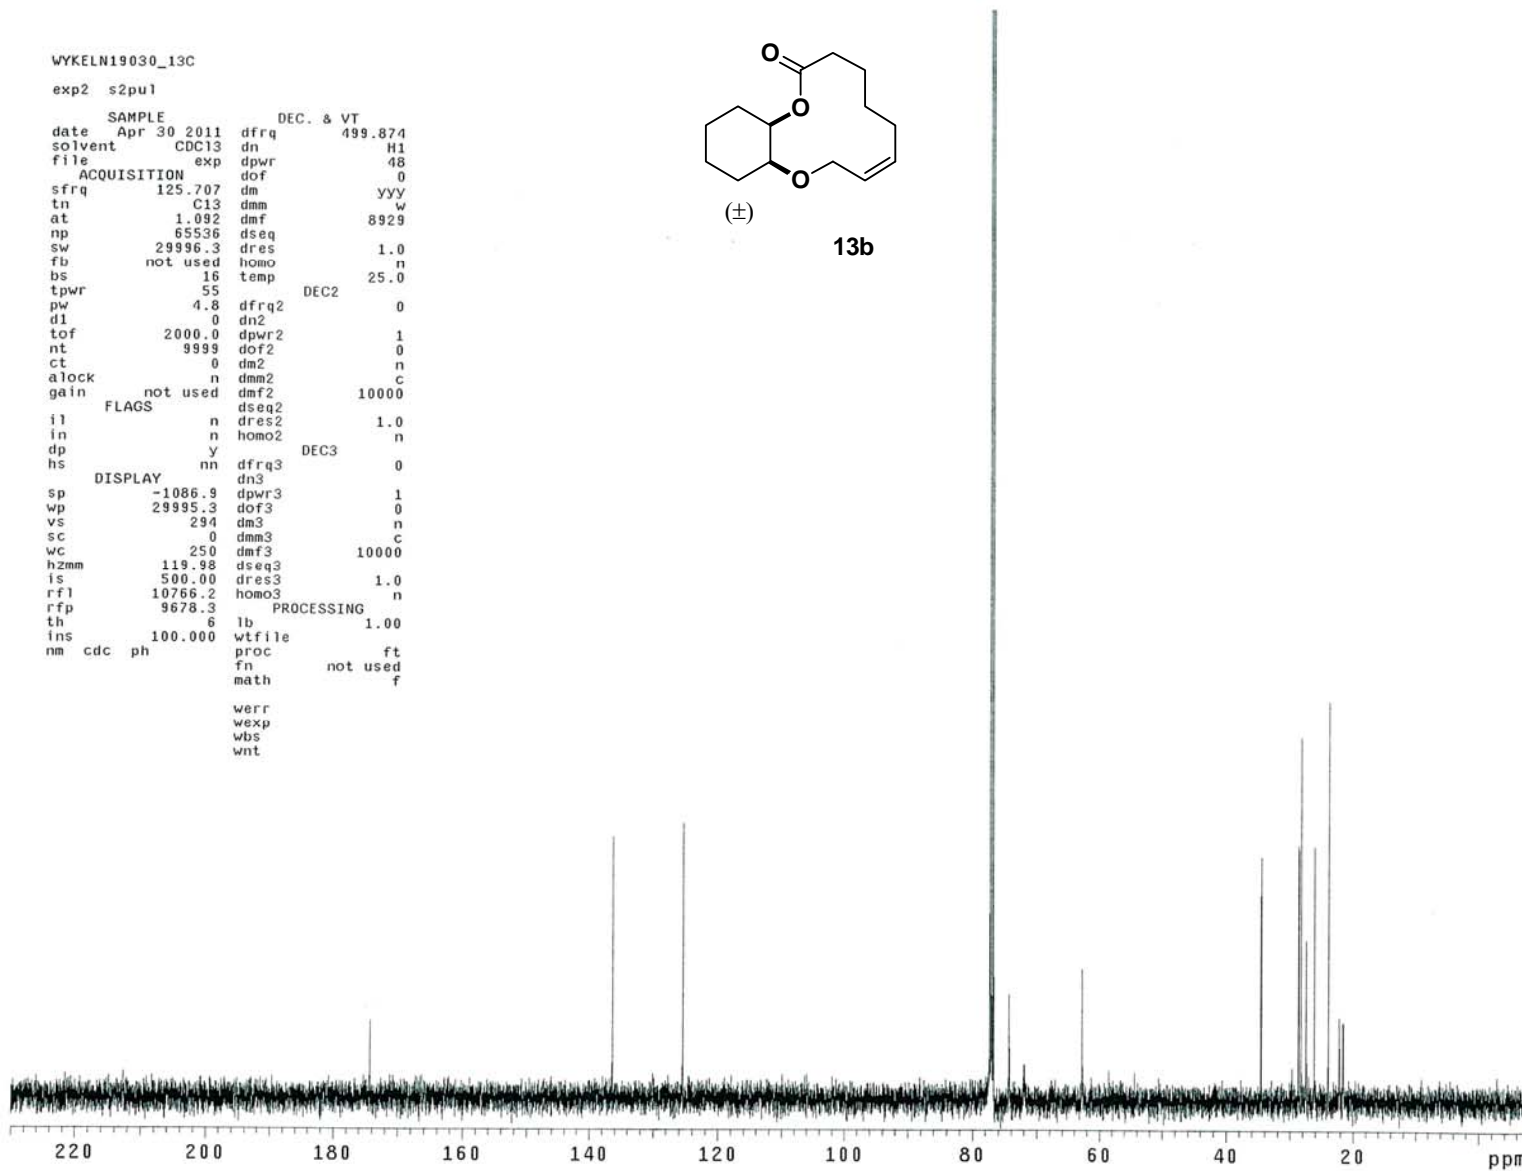

S136



WYKELN8089\_1H

exp1 s2pul

```
SAMPLE          DEC. & VT
date Apr 29 2010 dfrq 499.874
solvent CDC13    dn      H1
file /export/home/~ dpwr 30
ds2/vnmrsys/data/i~ dof 0
500c/schreiber/WAN~ dm   nnn
G/Pub1/WYKELN8089_~ dmm  c
1H.fid          dmf  200
ACQUISITION     dseq
sfrq 499.875    dres 1.0
tn    H1        homo  n
at    2.184     temp 25.0
np    32768
sw    7501.2    lb    1.10
fb    not used  wtfile
bs    4         proc  ft
ss    2         fn    32768
tpwr  62       math  f
pw    12.0
d1    0         werr
tof   800.0    wexp
nt    32       wbs
ct    32       wnt
alock n
gain  not used wft
FLAGS
il    n
in    n
dp    y
hs    nn
DISPLAY
sp    -250.2
wp    4998.6
vs    102
sc    0
wc    250
hzmm  19.99
is    741.30
rfl   4089.8
rfp   3629.1
th    1
ins   1.000
nm    ph
```

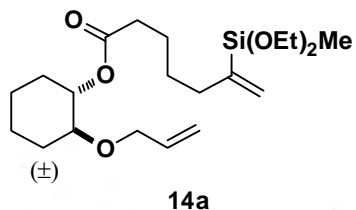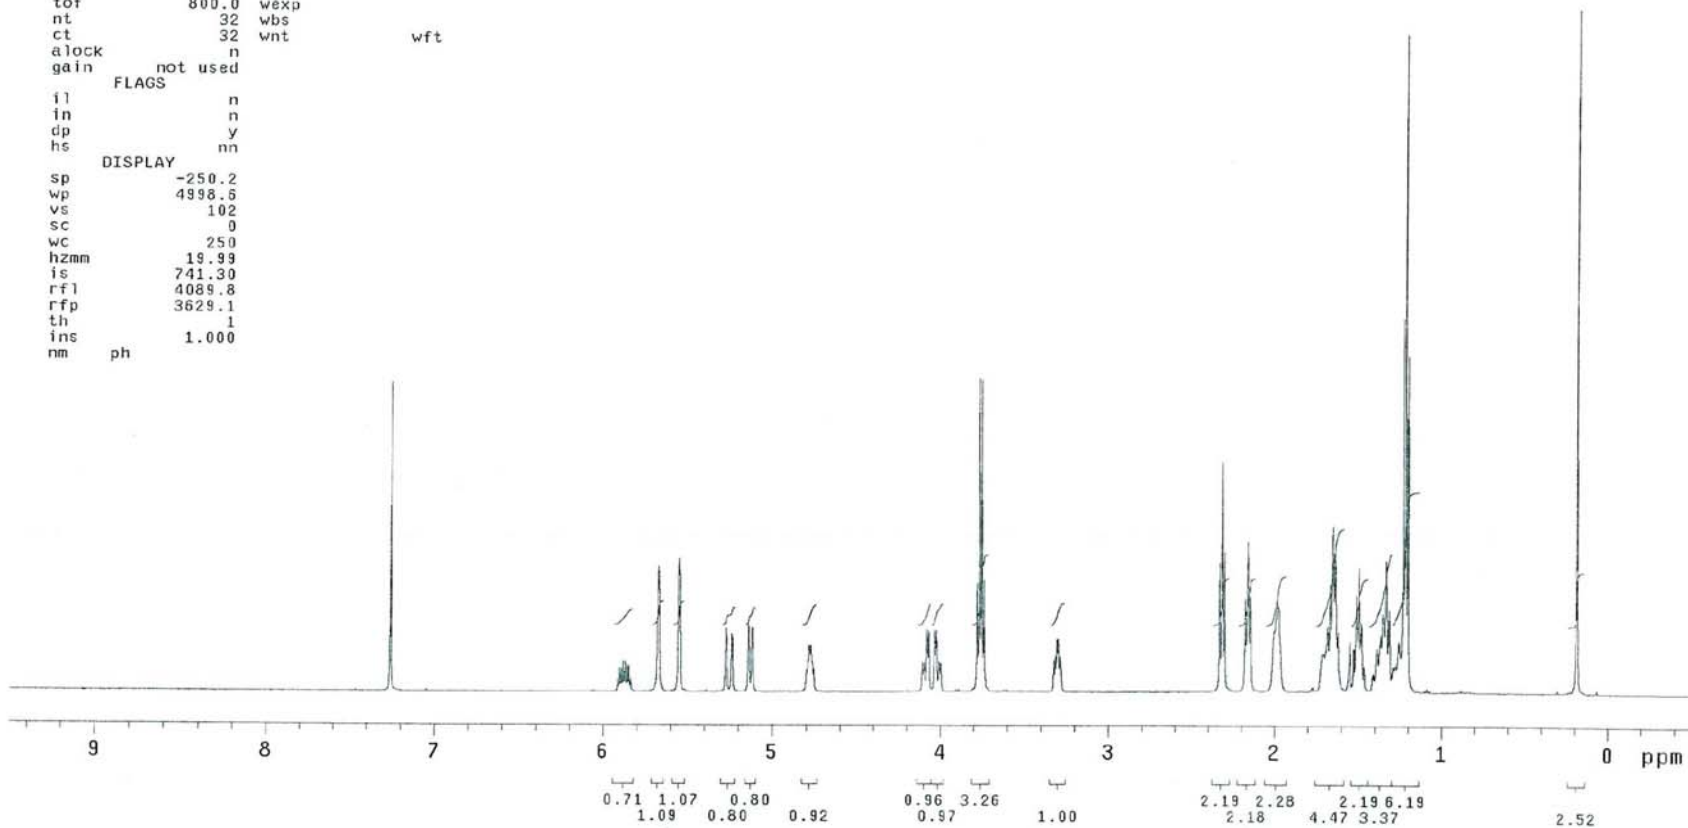

S137

WYKELN8089\_13C

exp2 s2pu1

|                  |              |
|------------------|--------------|
| SAMPLE           | DEC. & VT    |
| date Apr 29 2010 | dfrq 499.874 |
| solvent CDC13    | dn H1        |
| file exp         | dpwr 48      |
| ACQUISITION      | dof 0        |
| sfrq 125.707     | dm yyy       |
| tn C13           | dmm w        |
| at 1.092         | dmf 10000    |
| np 65536         | dseq         |
| sw 29996.3       | dres 1.0     |
| fb not used      | homo n       |
| bs 32            | temp 25.0    |
| lpwr 55          | DEC2         |
| pw 4.2           | dfrq2 0      |
| d1 0             | dn2          |
| tof 2000.0       | dpwr2 1      |
| nt 99999         | dof2 0       |
| ct 928           | dm2 n        |
| alock not used   | dmm2 c       |
| gain not used    | dmf2 10000   |
| FLAGS            | dseq2        |
| il n             | dres2 1.0    |
| in n             | homo2 n      |
| dp y             | DEC3         |
| hs nn            | dfrq3 0      |
| DISPLAY          | dn3          |
| sp -1087.8       | dpwr3 1      |
| wp 29995.3       | dof3 0       |
| vs 49            | dm3 n        |
| sc 0             | dmm3 c       |
| wc 250           | dmf3 10000   |
| hzmm 119.88      | dseq3        |
| is 500.00        | dres3 1.0    |
| rfl 10767.1      | homo3 n      |
| rfp 9678.3       | PROCESSING   |
| th 4             | lb 1.00      |
| ins 100.000      | wf file      |
| nm cdc ph        | proc ft      |
|                  | fn not used  |
|                  | math f       |
|                  | werr         |
|                  | wexp         |
|                  | wbs          |
|                  | wnt          |

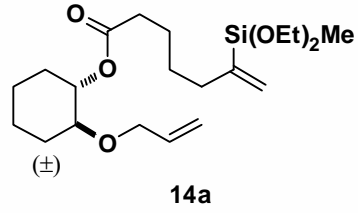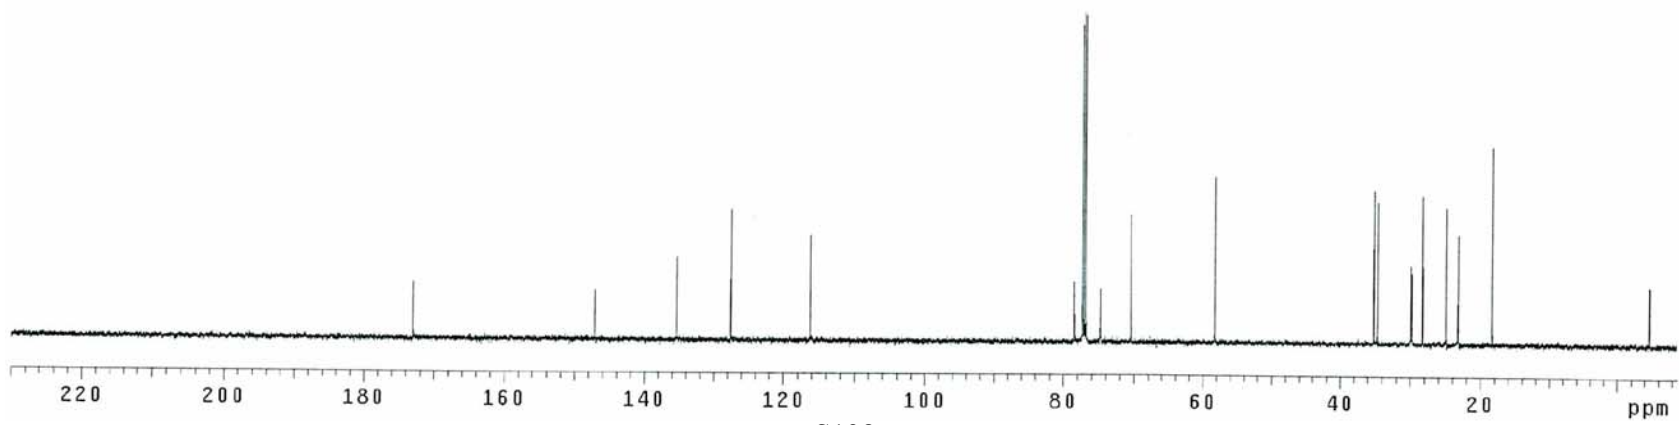

S138

WYKELN10032\_1H

exp1 s2pu1

```
SAMPLE          DEC. & VT
date Apr 30 2010 dfrq      499.874
solvent CDC13      dn      H1
file /export/home/~ dpwr    30
ds2/vnmrsys/data/~ dof     0
500c/schreiber/wAN~ dm     nnn
G/Pub1/WYKELN10032~ dmm    c
1H.fid          dmf      200
ACQUISITION     dseq
sfrq      499.875 dres    1.0
tn        H1      homa    n
at        2.184  temp    25.0
np        32768
sw        7501.2  lb      1.10
fb        not used wtfile
bs        4      proc     ft
ss        2      fn      32768
tpwr     52     math     f
pw        12.0
d1        0      werr
tof       800.0 wexp
nt        32     wbs
ct        32     wnt
alock     n
gain      not used
FLAGS
fl        n
in        n
dp        y
hs        nn
DISPLAY
sp        -250.2
wp        4998.6
vs        100
sc        0
wc        250
hzmm     19.99
is        598.03
rfl      4089.8
rfp      3529.1
th        1
ins      1.000
nm        ph
```

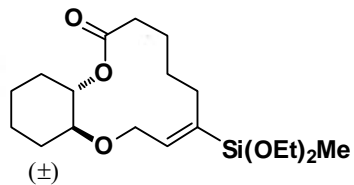

14

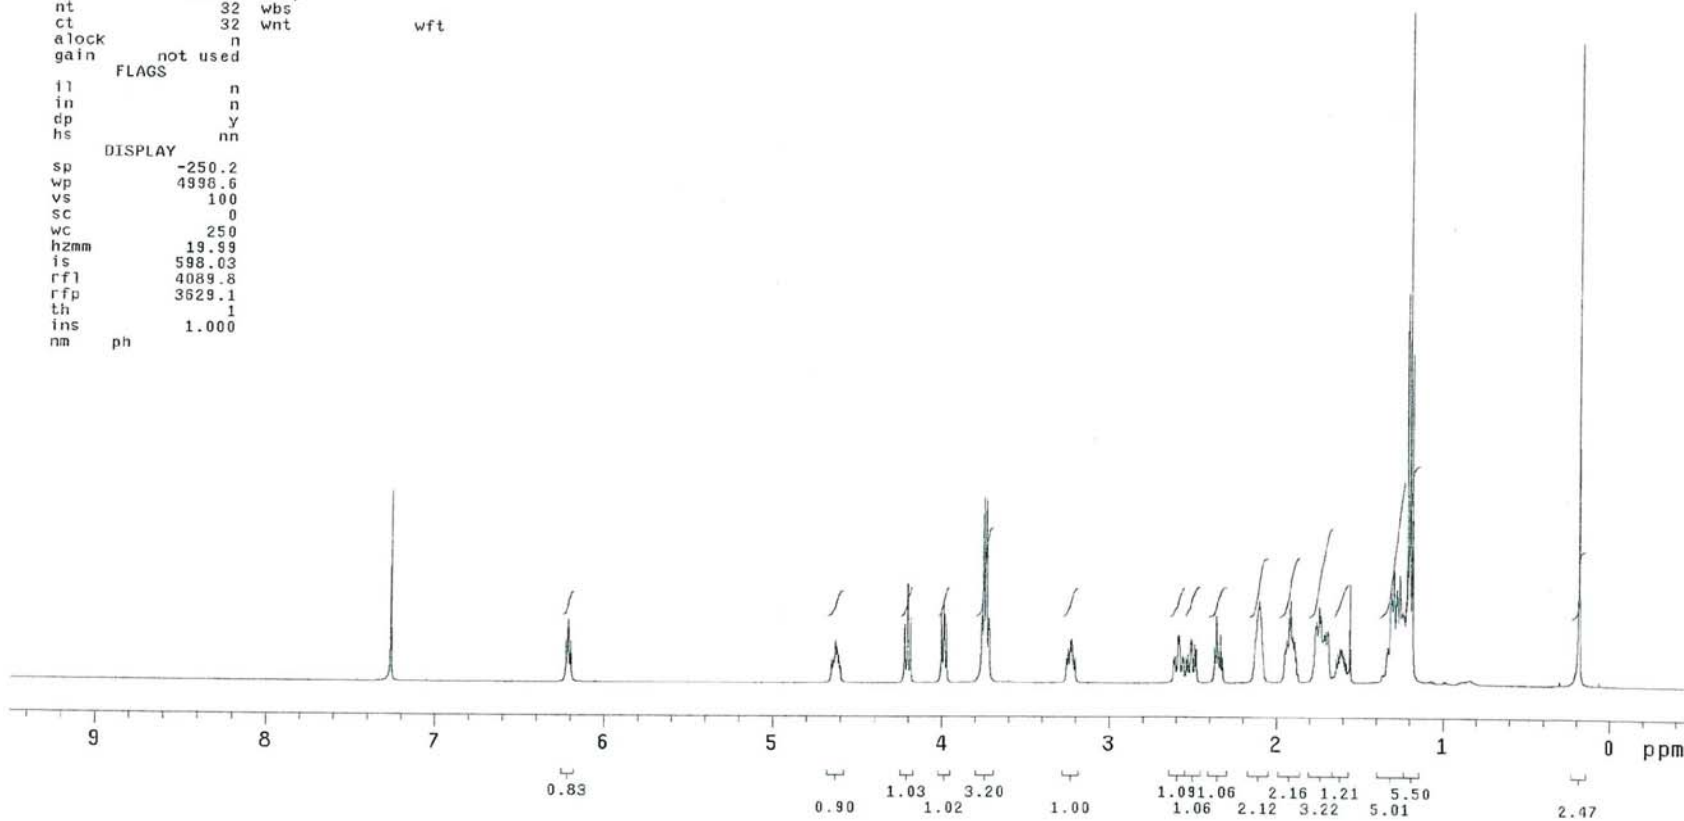

S139

WYKELN10032\_13C

exp3 s2pu1

| SAMPLE      |             | DEC. & VT  |          |
|-------------|-------------|------------|----------|
| date        | Apr 30 2010 | dfrq       | 499.874  |
| solvent     | CDC13       | dn         | H1       |
| file        | exp         | dpwr       | 48       |
| ACQUISITION |             | dof        | 0        |
| sfrq        | 125.707     | dm         | yyy      |
| tn          | C13         | dmm        | w        |
| at          | 1.092       | dmf        | 10000    |
| np          | 65536       | dseq       |          |
| sw          | 29996.3     | dres       | 1.0      |
| fb          | not used    | homo       | n        |
| bs          | 32          | temp       | 25.0     |
| tpwr        | 55          | DEC2       |          |
| pw          | 4.2         | dfrq2      | 0        |
| d1          | 0           | dn2        |          |
| tof         | 2000.0      | dpwr2      | 1        |
| nt          | 99999       | dof2       | 0        |
| ct          | 1216        | dm2        | n        |
| alock       | not used    | dmm2       | c        |
| gain        | not used    | dmf2       | 10000    |
| FLAGS       |             | dseq2      |          |
| il          | n           | dres2      | 1.0      |
| in          | n           | homo2      | n        |
| dp          | y           | DEC3       |          |
| hs          | nn          | dfrq3      | 0        |
| DISPLAY     |             | dn3        |          |
| sp          | -1090.6     | dpwr3      | 1        |
| wp          | 29995.3     | dof3       | 0        |
| vs          | 18          | dm3        | n        |
| sc          | 0           | dmm3       | c        |
| wc          | 250         | dmf3       | 10000    |
| hzmm        | 119.98      | dseq3      |          |
| is          | 500.00      | dres3      | 1.0      |
| rfl         | 10769.8     | homo3      | n        |
| rffp        | 9678.3      | PROCESSING |          |
| th          | 4           | lb         | 1.00     |
| ins         | 100.000     | wffile     |          |
| nm          | cdc ph      | proc       | ft       |
|             |             | fn         | not used |
|             |             | math       | f        |
|             |             | werr       |          |
|             |             | wexp       |          |
|             |             | wbs        |          |
|             |             | wnt        |          |

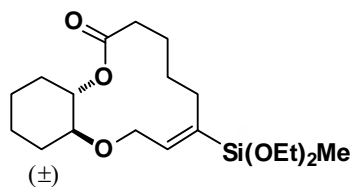

14

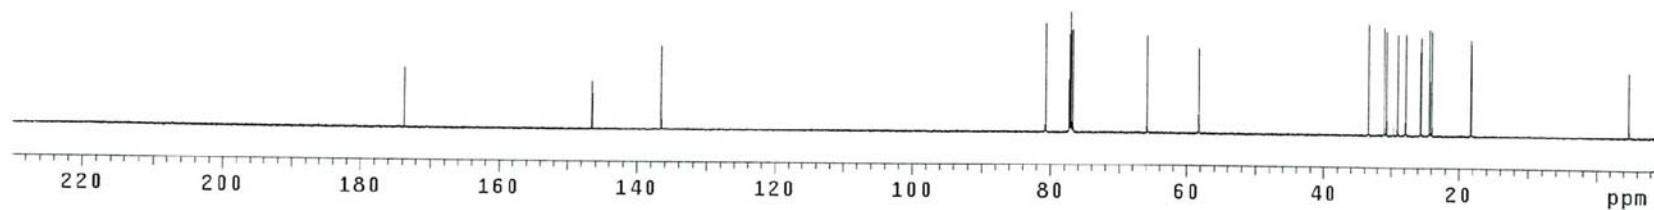

S140

WYKELN8087\_1H

expl s2pu1

```
SAMPLE          DEC. & VT
date Apr 28 2010 dfrq 499.874
solvent CDC13    dn      H1
file /export/home/~ dpwr 30
ds2/vnmrsys/data/~ dof  0
500c/schreiber/WAN~ dm   nnn
G/Pub1/WYKELN8087_~ dmm  c
1H.fid          dmf   200
ACQUISITION
sfrq 499.875    dres  1.0
tn    H1        homo  n
at    2.184     temp  25.0
np    32768
sw    7501.2    lb     1.10
fb    not used  wtfile
bs    4         proc   ft
ss    2         fn     32768
tpwr  62       math   f
pw    12.0
d1    0         werr
tof   800.0    wexp
nt    32       wbs
ct    32       wnt
alock n
gain  not used
FLAGS
il    n
in    n
dp    y
hs    nn
DISPLAY
sp    -250.2
wp    4998.6
vs    97
sc    0
wc    250
hzmm  19.99
is    529.59
rfl   4090.8
rfp   3629.1
th    4
ins   1.000
nm    ph
```

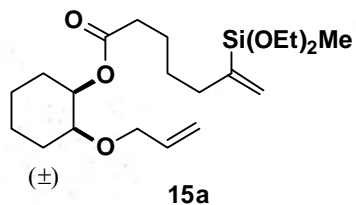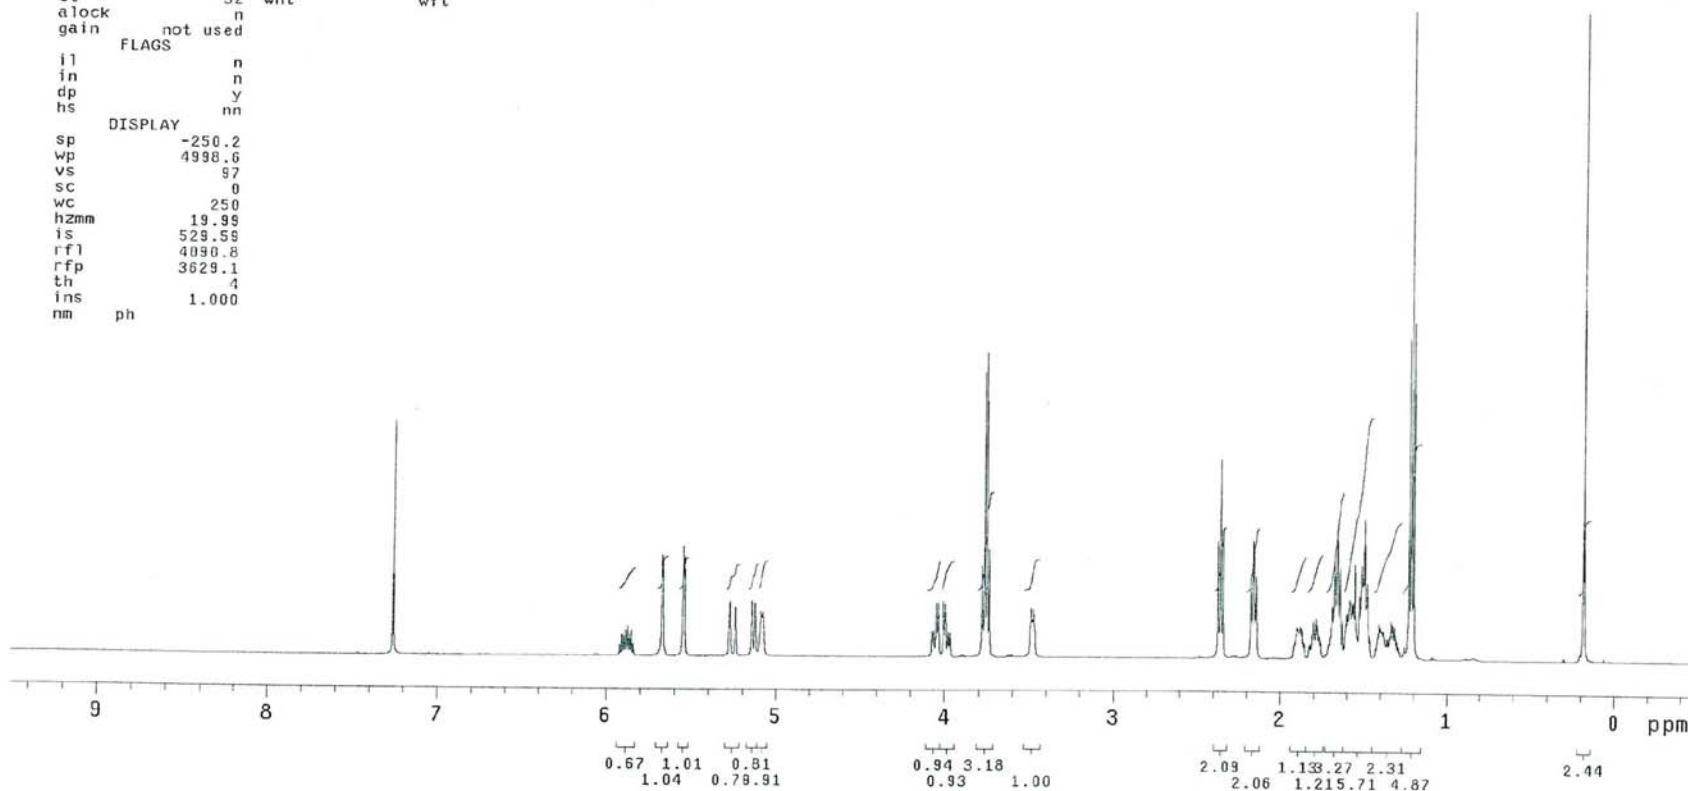

S141

WYKELN8087\_13C

exp3 s2pu1

| SAMPLE      |             | DEC. & VT  |          |
|-------------|-------------|------------|----------|
| date        | Apr 28 2010 | dfrq       | 499.874  |
| solvent     | CDC13       | dn         | H1       |
| file        | exp         | dpwr       | 48       |
| ACQUISITION |             |            |          |
| sfrq        | 125.707     | dm         | YYY      |
| tn          | C13         | dmm        | w        |
| at          | 1.092       | dmf        | 10000    |
| np          | 65536       | dseq       |          |
| sw          | 29996.3     | dres       | 1.0      |
| fb          | not used    | homo       | n        |
| bs          | 32          | temp       | 25.0     |
| tpwr        | 55          | DEC2       |          |
| pw          | 4.2         | dfrq2      | 0        |
| d1          | 0           | dn2        |          |
| tof         | 2000.0      | dpwr2      | 1        |
| nt          | 99999       | dof2       | 0        |
| ct          | 896         | dm2        | n        |
| alock       | n           | dmm2       | c        |
| gain        | not used    | dmf2       | 10000    |
| FLAGS       |             |            |          |
| i1          | n           | dres2      | 1.0      |
| i2          | n           | homo2      | n        |
| dp          | y           | DEC3       |          |
| hs          | nn          | dfrq3      | 0        |
| DISPLAY     |             |            |          |
| sp          | -1087.8     | dn3        |          |
| wp          | 29995.3     | dpwr3      | 1        |
| vs          | 37          | dof3       | 0        |
| sc          | 0           | dm3        | n        |
| vc          | 250         | dmm3       | c        |
| hzmm        | 119.98      | dmf3       | 10000    |
| ls          | 500.00      | dseq3      |          |
| rfl         | 1088.7      | dres3      | 1.0      |
| rffp        | 0           | homo3      | n        |
| th          | 2           | PROCESSING |          |
| ins         | 100.000     | 1b         | 1.00     |
| nm          | cdc ph      | wfile      |          |
|             |             | proc       | ft       |
|             |             | fn         | not used |
|             |             | math       | f        |
|             |             | werr       |          |
|             |             | wexp       |          |
|             |             | wbs        |          |
|             |             | wnt        |          |

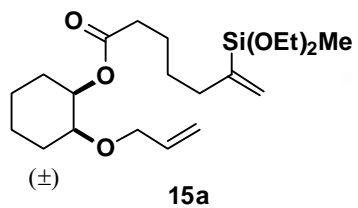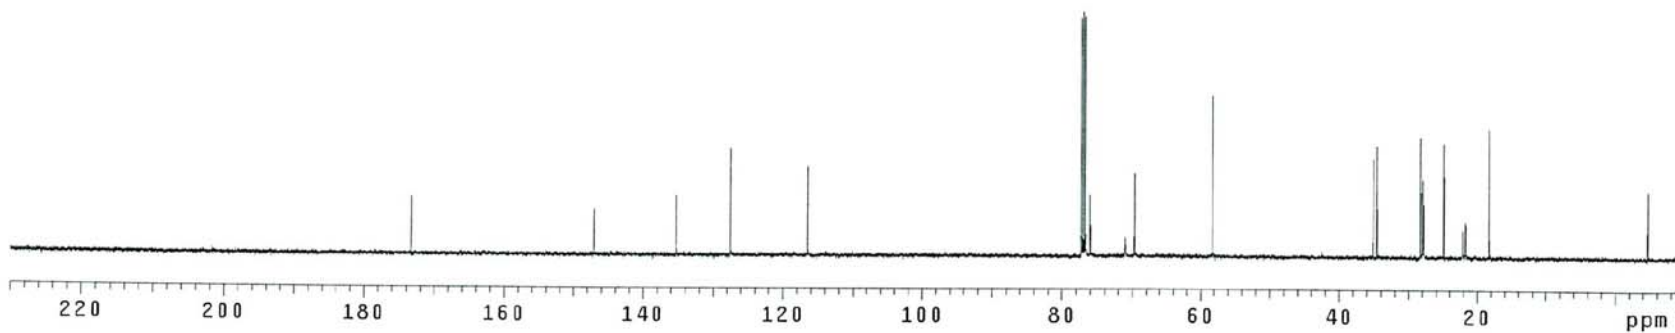

S142

WYKELN10030\_1H

exp1 s2pu1

```
SAMPLE          DEC. & VT
date   Apr 30 2010   dfrq   499.874
solvent CDC13       dn      H1
file   /export/home/~ ds2/vnmrsys/data/i~ dpwr   30
500c/schreiber/WAN~ dm      nnn
G/Pub1/WYKELN10030~ dmm     c
_1H.fid          dmf     200
ACQUISITION
sfrq   499.875     dres   1.0
tn      H1         homo   n
at      2.184     temp  25.0
np      32768
sw      7501.2    lb      1.10
fb      not used  wtfile
bs      4         proc   ft
ss      2         fn      32768
tpwr    62       math   f
pw      12.0
d1      0        werr
tof     800.0    wexp
nt      32      wbs
ct      32      wnt
alock   n
gain    not used
        FLAGS
il      n
in      n
dp      y
hs      nn
DISPLAY
sp      -250.2
wp      4998.6
vs      75
sc      0
wc      250
hzmm    19.99
ls      359.36
rf1     4089.8
rfp     3629.1
th      1
ins     1.000
nm      ph
```

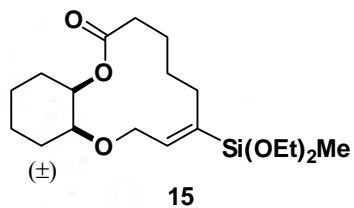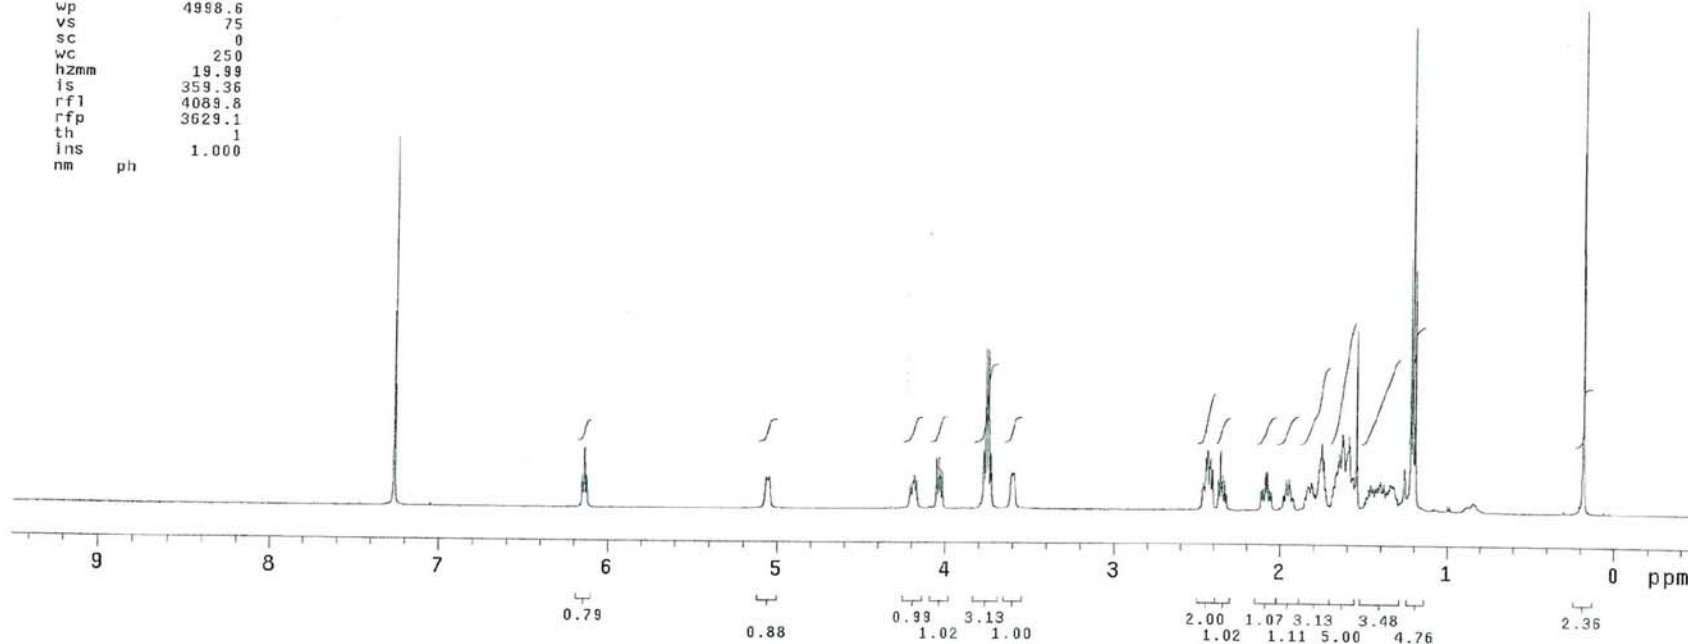

S143

WYKELN10030\_13C

exp3 s2pu1

| SAMPLE      |             | DEC. & VT  |          |
|-------------|-------------|------------|----------|
| date        | Apr 30 2010 | dfrq       | 499.874  |
| solvent     | CDC13       | dn         | H1       |
| file        | exp         | dpwr       | 48       |
| ACQUISITION |             |            |          |
| sfrq        | 125.707     | dm         | yyy      |
| tn          | C13         | dmm        | w        |
| at          | 1.092       | dmf        | 10000    |
| np          | 65536       | dseq       |          |
| sw          | 29996.3     | dres       | 1.0      |
| fb          | not used    | homo       | n        |
| bs          | 32          | temp       | 25.0     |
| tpwr        | 55          | DEC2       |          |
| pw          | 4.2         | dfrq2      | 0        |
| d1          | 0           | dn2        |          |
| tof         | 2000.0      | dpwr2      | 1        |
| nt          | 99999       | dof2       | 0        |
| ct          | 1632        | dm2        | n        |
| alock       | not used    | dmm2       | c        |
| gain        | not used    | dmf2       | 10000    |
| FLAGS       |             |            |          |
| il          | n           | dres2      | 1.0      |
| in          | n           | homo2      | n        |
| dp          | y           | DEC3       |          |
| hs          | nn          | dfrq3      | 0        |
| DISPLAY     |             |            |          |
| sp          | -1086.9     | dn3        |          |
| wp          | 29995.3     | dpwr3      | 1        |
| vs          | 97          | dof3       | 0        |
| sc          | 0           | dm3        | n        |
| wc          | 250         | dmm3       | c        |
| hzmm        | 119.98      | dmf3       | 10000    |
| is          | 500.00      | dseq3      |          |
| rf1         | 10766.2     | dres3      | 1.0      |
| rfp         | 9678.3      | homo3      | n        |
| th          | 2           | PROCESSING |          |
| ins         | 100.000     | lb         | 1.00     |
| nm          | cdc ph      | wtfile     |          |
|             |             | proc       | ft       |
|             |             | fn         | not used |
|             |             | math       | f        |
|             |             | werr       |          |
|             |             | wexp       |          |
|             |             | wbs        |          |
|             |             | wnt        |          |

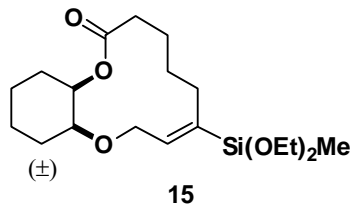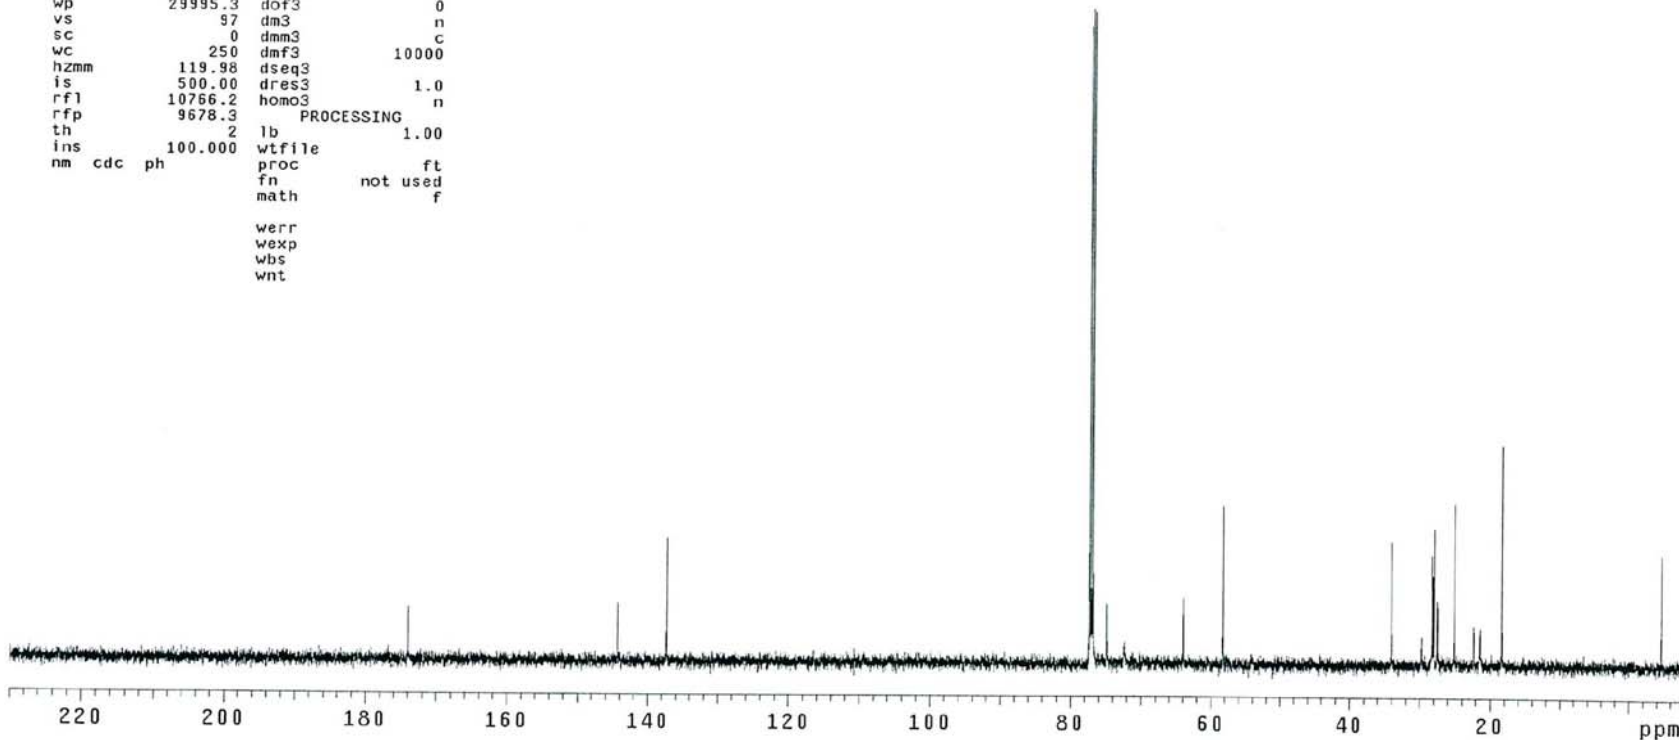

S144



WYKELN8083\_1H

expl s2pu1

```
SAMPLE          DEC. & VT
date    Apr 25 2010    dfrq      499.874
solvent  CDC13         dn          H1
file    /export/home/~ ds2/vnmrsys/data/i- dpwr       30
500C/Schreiber/WAN~  dm          0
G/Pub1/WYKELN8083_~  dmm       nnn
1H.fid         dmf       c
ACQUISITION      dseq      200
sfrq      499.875    dres      1.0
tn         H1        homo      n
at         2.184     temp      25.0
np         32768
sw         7501.2    lb         1.10
fb         not used  wtfile
bs         4        proc       ft
ss         2        fn         32768
tpwr       52      math       f
pw         12.0
d1         0        werr
tof        800.0    wexp
nt         32      wbs
ct         32      wnt
alock      n
gain       not used  wft
FLAGS
fl         n
in         n
dp         y
hs         nn
DISPLAY
sp         -250.2
wp         4998.6
vs         115
sc         0
wc         250
hzmm       19.99
is         717.25
rfl        4090.3
rfp        3529.1
th         3
ins        2.000
nm         ph
```

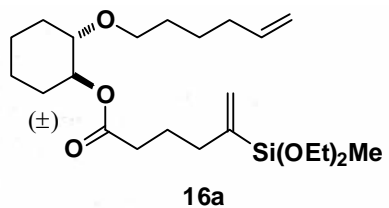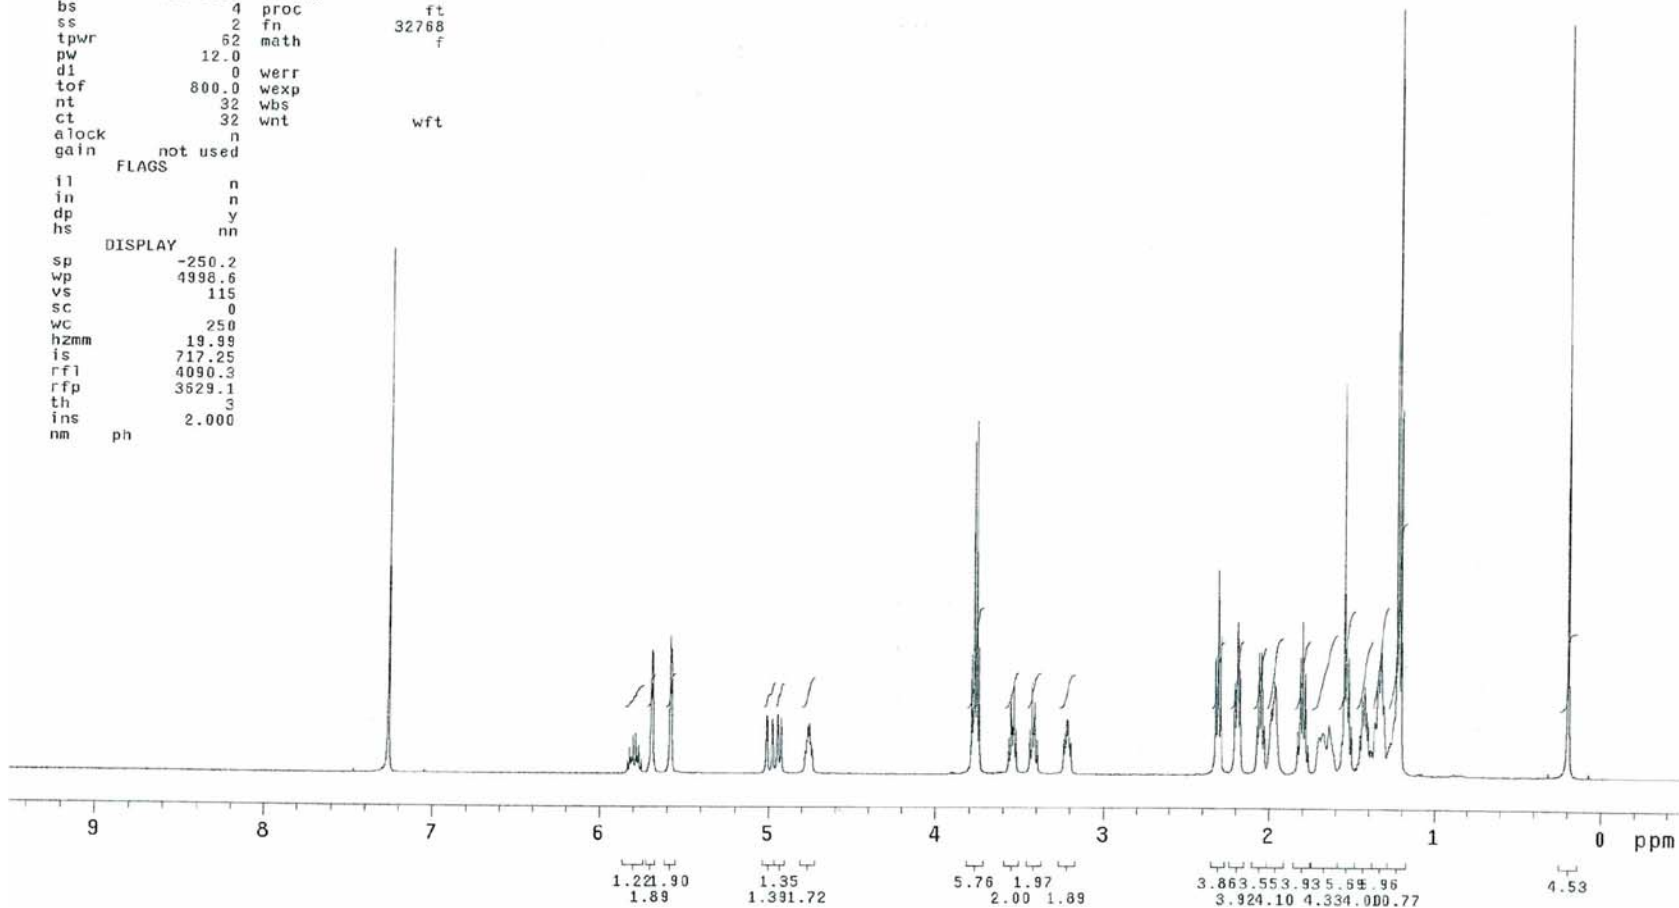

S145

WYKELN8083\_13C

exp2 s2pu1

| SAMPLE      |             | DEC. & VT  |          |
|-------------|-------------|------------|----------|
| date        | Apr 25 2010 | dfrq       | 499.874  |
| solvent     | CDC13       | dn         | H1       |
| file        | exp         | dpwr       | 48       |
| ACQUISITION |             | dof        | 0        |
| sfrq        | 125.707     | dm         | yyy      |
| tn          | C13         | dmm        | w        |
| at          | 1.092       | dmf        | 10000    |
| np          | 65536       | dseq       |          |
| sw          | 29996.3     | dres       | 1.0      |
| fb          | not used    | homo       | n        |
| bs          | 16          | temp       | 25.0     |
| tpwr        | 55          | DEC2       |          |
| pw          | 2.0         | dfrq2      | 0        |
| d1          | 0           | dn2        |          |
| tof         | 2000.0      | dpwr2      | 1        |
| nt          | 9999        | dof2       | 0        |
| ct          | 2848        | dm2        | n        |
| alock       | n           | dmm2       | c        |
| gain        | not used    | dmf2       | 10000    |
| FLAGS       |             | dseq2      |          |
| il          | n           | dres2      | 1.0      |
| in          | n           | homo2      | n        |
| dp          | y           | DEC3       |          |
| hs          | nn          | dfrq3      | 0        |
| DISPLAY     |             | dn3        |          |
| sp          | -1087.8     | dpwr3      | 1        |
| wp          | 29995.3     | dof3       | 0        |
| vs          | 65          | dm3        | n        |
| sc          | 0           | dmm3       | c        |
| wc          | 250         | dmf3       | 10000    |
| hzmm        | 119.98      | dseq3      |          |
| is          | 500.00      | dres3      | 1.0      |
| rfl         | 10767.1     | homo3      | n        |
| rfp         | 9678.3      | PROCESSING |          |
| th          | 2           | lb         | 1.00     |
| ins         | 100.000     | wtfile     |          |
| nm          | cdc ph      | proc       | ft       |
|             |             | fn         | not used |
|             |             | math       | f        |
|             |             | werr       |          |
|             |             | wexp       |          |
|             |             | wbs        |          |
|             |             | wnt        |          |

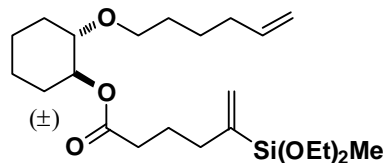

16a

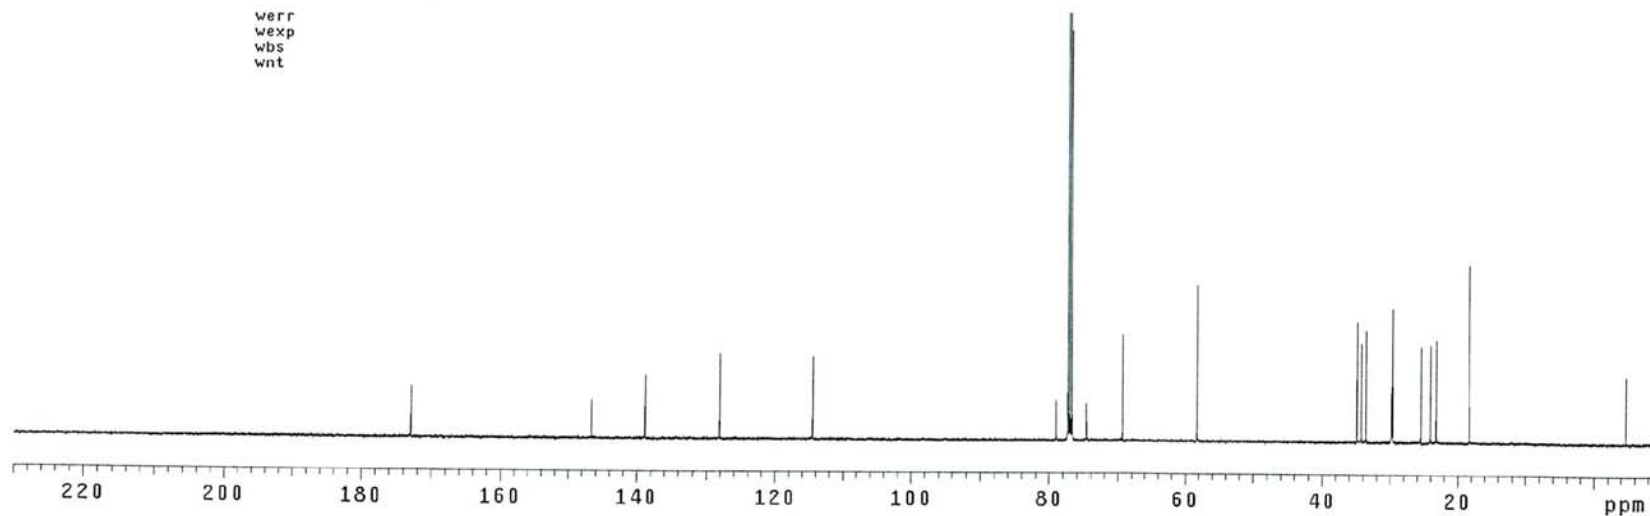

S146

WYKELN10026\_1H

expl s2pu1

SAMPLE DEC. & VT  
date Apr 29 2010 dfrq 499.874  
solvent CDCl3 dn H1  
file /export/home/~ dpwr 30  
ds2/vnmrsys/data/i~ dof 0  
500c/schreiber/WAN~ dm nnn  
G/Pub1/WYKELN10026~ dmm c  
1H.fid dmf 200

ACQUISITION  
sfrq 499.875 dres 1.0  
tn H1 homo n  
at 2.184 temp 25.0  
np 32768  
sw 7501.2 lb 1.10  
fb not used wtfile  
bs 4 proc ft  
ss 2 fn 32768  
tpwr 62 math f  
pw 12.0  
d1 0 verr  
tof 800.0 wexp  
nt 32 wbs  
ct 32 wnt wft  
alock n  
gain not used

FLAGS  
il n  
in n  
dp y  
hs nn

DISPLAY  
sp -250.2  
wp 4998.6  
vs 151  
sc 0  
wc 250  
hzmm 19.99  
fs 910.49  
rf1 4090.3  
rfp 3629.1  
th 7  
ins 2.000  
nm ph

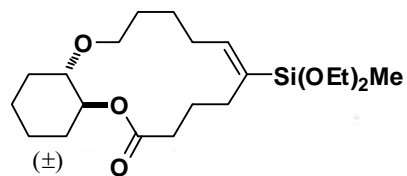

16

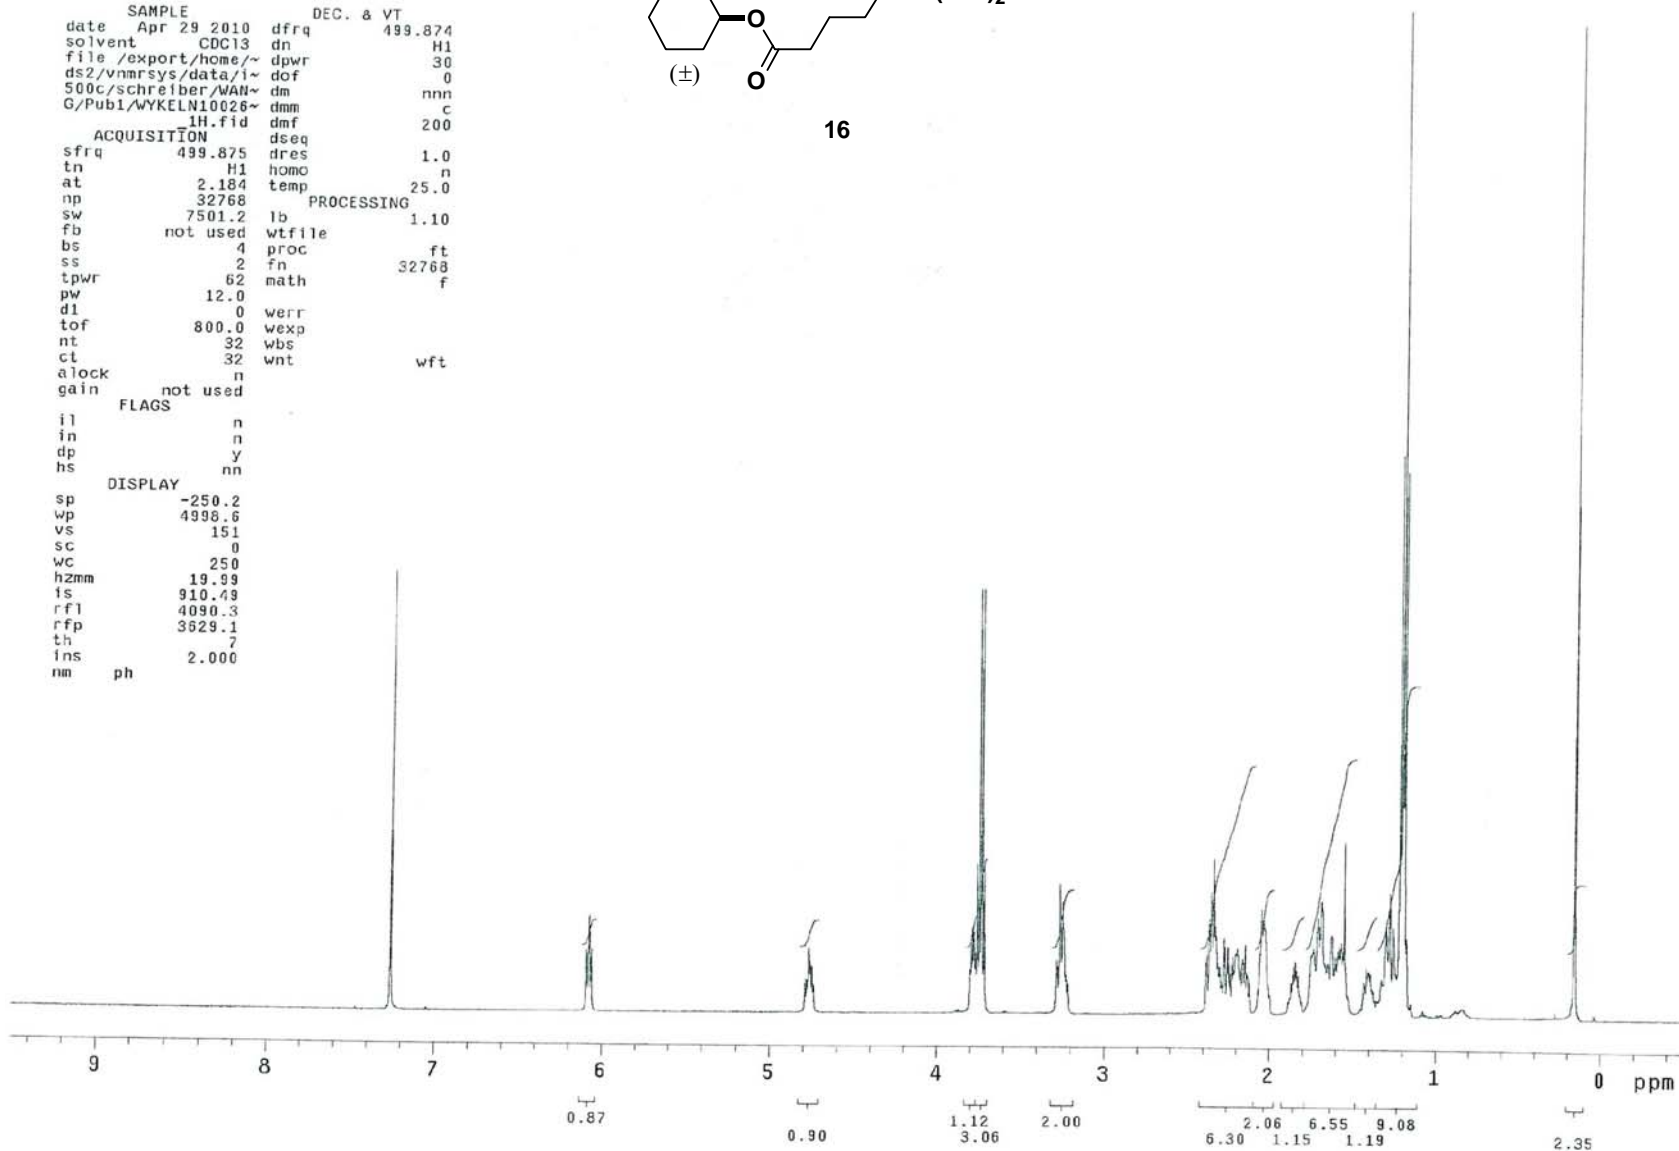

S147

WYKELN10026\_13C

exp2 s2pu1

| SAMPLE      |             | DEC. & VT  |          |
|-------------|-------------|------------|----------|
| date        | Apr 29 2010 | dfrq       | 499.874  |
| solvent     | CDC13       | dn         | H1       |
| file        | exp         | dpwr       | 48       |
| ACQUISITION |             | dof        | 0        |
| sfrq        | 125.707     | dm         | yyy      |
| tn          | C13         | dmm        | w        |
| at          | 1.092       | dmf        | 10000    |
| np          | 65536       | dseq       |          |
| sw          | 29995.3     | dres       | 1.0      |
| fb          | not used    | homo       | n        |
| bs          | 32          | temp       | 25.0     |
| tpwr        | 55          | DEC2       |          |
| pw          | 4.2         | dfrq2      | 0        |
| d1          | 0           | dn2        |          |
| tof         | 2000.0      | dpwr2      | 1        |
| nt          | 99999       | dof2       | 0        |
| ct          | 256         | dm2        | n        |
| alock       | n           | dmm2       | c        |
| gain        | not used    | dmf2       | 10000    |
| FLAGS       |             | dseq2      |          |
| i1          | n           | dres2      | 1.0      |
| i2          | n           | homo2      | n        |
| dp          | y           | DEC3       |          |
| hs          | nn          | dfrq3      | 0        |
| DISPLAY     |             | dn3        |          |
| sp          | -1089.7     | dpwr3      | 1        |
| wp          | 29995.3     | dof3       | 0        |
| vs          | 23          | dm3        | n        |
| sc          | 0           | dmm3       | c        |
| wc          | 250         | dmf3       | 10000    |
| hzmm        | 119.98      | dseq3      |          |
| is          | 500.00      | dres3      | 1.0      |
| rfl         | 10768.9     | homo3      | n        |
| rffp        | 9678.3      | PROCESSING |          |
| th          | 5           | lb         | 1.00     |
| ins         | 100.000     | wtfile     |          |
| nm cdc ph   |             | proc       | ft       |
|             |             | fn         | not used |
|             |             | math       | f        |
|             |             | werr       |          |
|             |             | wexp       |          |
|             |             | wbs        |          |
|             |             | wnt        |          |

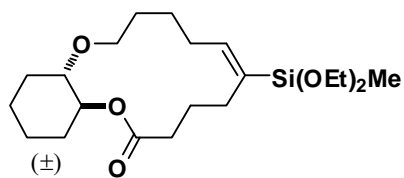

16

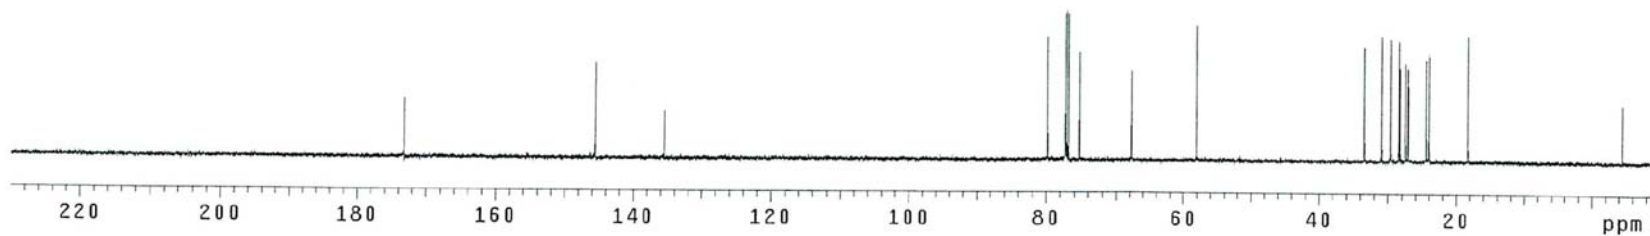

S148

WYKELN19026\_1H

exp1 s2pu1

```
SAMPLE          DEC. & VT
date Apr 30 2011 dfrq          499.874
solvent CDC13      dn          H1
file          exp  dpwr         30
ACQUISITION    dof          0
sfrq          499.875 dm         nnn
tn            H1  dmm          c
at            2.184 dmf         200
np            32768 dseq        1.0
sw            7501.2 dres        1.0
fb            not used homo      n
bs            4     temp        25.0
ss            2     DEC2
tpwr          62    dfrq2       0
pw            12.0 dn2          1
d1            0     dpwr2       0
tof           800.0 dof2        n
nt            16    dm2         c
ct            0     dmm2        200
alock         n     dmf2        1.0
gain          not used dseq2     1.0
FLAGS         n     homo2      n
il            n     DEC3
in            y     dfrq3       0
dp            nn    dn3         1
hs            nn    dpwr3       0
DISPLAY       dof3        n
sp            -250.2 dm3         c
wp            4998.6 dmf3        200
vs            84    dseq3       1.0
sc            0     dres3       n
wc            250   homo3       1.0
hzmm          19.99 dres3       n
is            335.28 homo3       n
rfl           460.8 PROCESSING
rfp            0     lb          1.10
th            5     wtfile
ins           1.000 proc         ft
nm            ph    fn          32768
                    math         f
                    werr
                    wexp
                    wbs
                    wnt          wft
```

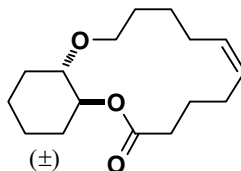

16b

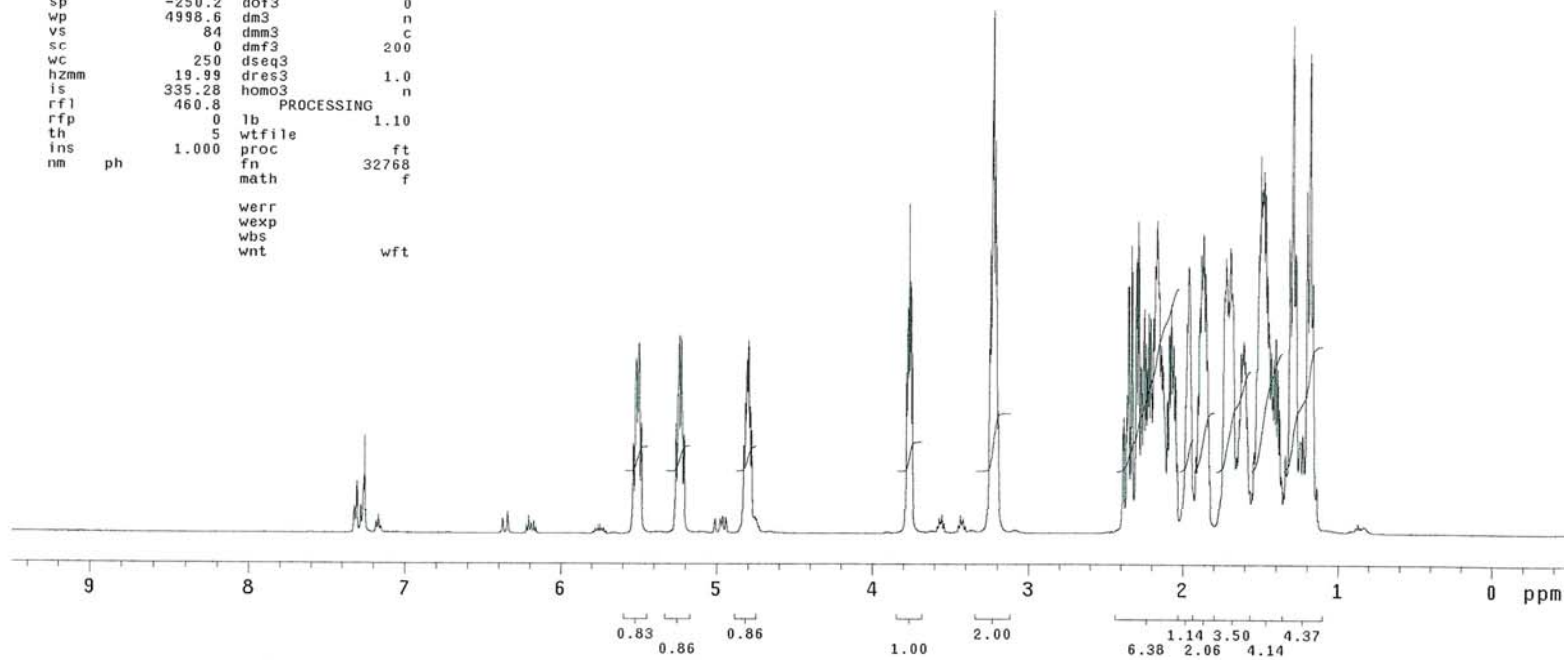

S149

WYKELN19026\_13C

exp2 s2pu1

```

SAMPLE          DEC. & VT
date Apr 30 2011 dfrq          499.874
solvent CDC13    dn           H1
file exp        dpwr         48
ACQUISITION    dof           0
sfrq 125.707    dm           yyy
tn C13          dmm          w
at 1.092       dmf          8929
np 65536       dseq
sw 29996.3     dres          1.0
fb not used    homo          n
bs 16         temp          25.0
tpwr 55        DEC2
pw 4.8        dfrq2         0
d1 0          dn2
tof 2000.0    dpwr2         1
nt 9999      dof2          0
ct 0         dm2          n
alock not used dm2          10000
gain not used dm2          10000
FLAGS
il n          dseq2
in n          dres2          1.0
dp y          homo2          n
hs nn        dfrq3         0
DISPLAY
sp -1090.6    dn3
wp 29995.3   dpwr3         1
vs 57        dof3          0
sc 0         dm3          n
wc 250       dmm3          c
hzmm 119.98  dm3          10000
is 500.00    dseq3
rfl 10769.8  dres3          1.0
rfp 9678.3   homo3          n
th 15        PROCESSING
ins 100.000  lb           1.00
nm cdc ph   wtfile
proc ft
fn not used
math f

werr
wexp
wbs
wnt
```

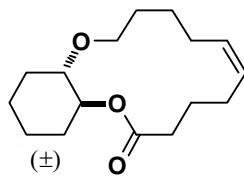

16b

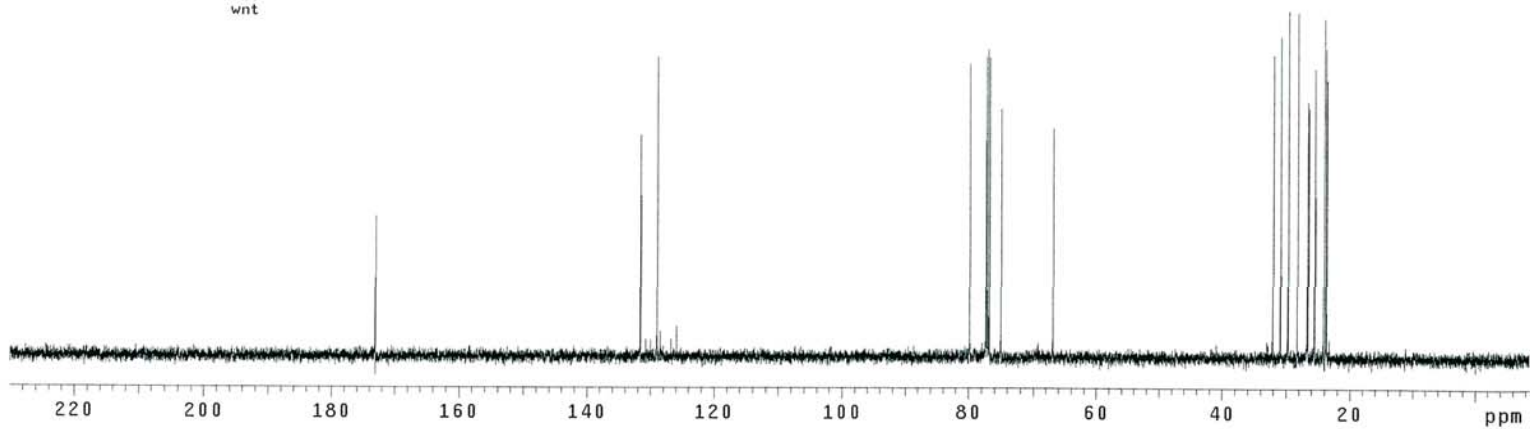

S150

WYKELN8084\_1H

exp1 s2pu1

```
SAMPLE          DEC. & VT
date Apr 25 2010 dfrq      499.874
solvent CDC13      dn       H1
file /export/home/~ dpwr    30
ds2/vnmrSYS/data/i~ dof    0
500c/schreiber/WAN~ dm     nnn
G/Pub1/WYKELN8084_~ dmm    c
1H.fid          dmf      200
ACQUISITION
sfrq      499.875 dseq
tn         H1      dres    1.0
at         2.184   homo    n
np         32768   temp    25.0
sw         7501.2 lb
fb         not used wtfile
bs         4       proc
ss         2       fn      32768
tpwr       62     math
pw         12.0   werr
dl         0      wexp
tof        800.0 wbs
nt         32    wnt
ct         32
alock      n
gain       not used wft
FLAGS
il         n
in         n
dp         y
hs         nn
DISPLAY
sp         -250.2
wp         4998.6
vs         107
sc         0
wc         250
hzmm       19.99
is         569.82
rfl        4090.3
rfp        3629.1
th         1
ins        1.000
nm         ph
```

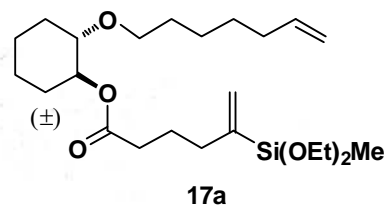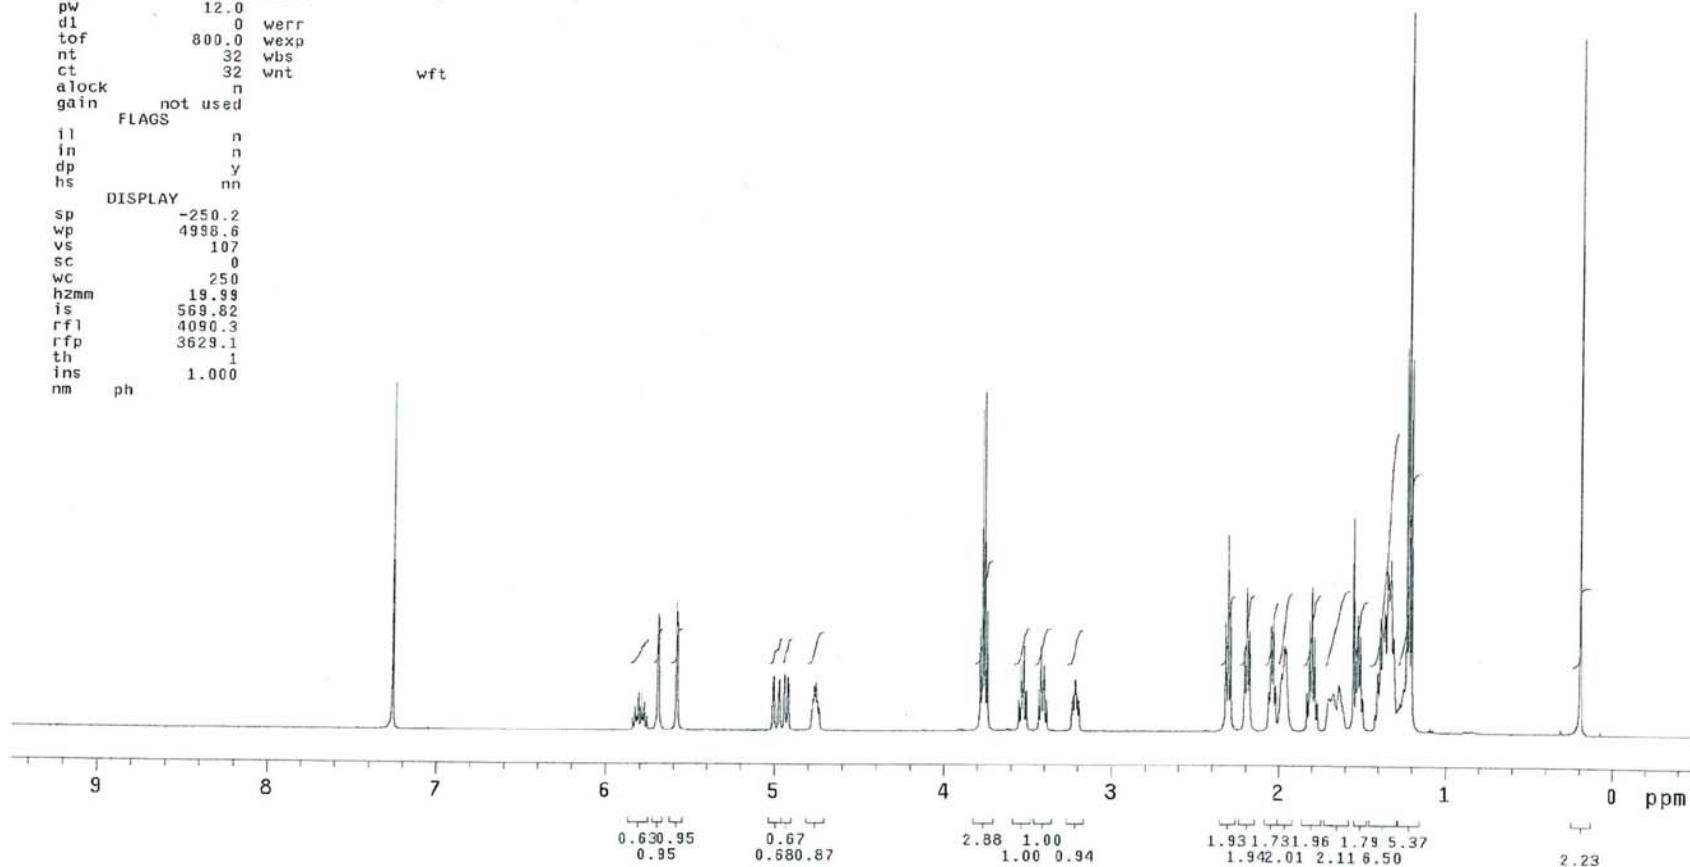

S151

WYKELN8081\_13C

exp2 s2pu1

| SAMPLE      |             | DEC. & VT |          |
|-------------|-------------|-----------|----------|
| date        | Apr 25 2010 | dfrq      | 499.874  |
| solvent     | CDC13       | dn        | H1       |
| file        | exp         | dpwr      | 48       |
| ACQUISITION |             |           |          |
| sfrq        | 125.707     | dm        | yyy      |
| tn          | C13         | dmm       | w        |
| at          | 1.092       | dmf       | 10000    |
| np          | 65536       | dseq      |          |
| sw          | 29996.3     | dres      | 1.0      |
| fb          | not used    | homo      | n        |
| bs          | 16          | temp      | 25.0     |
| tpwr        | 55          | DEC2      |          |
| pw          | 2.0         | dfrq2     | 0        |
| d1          | 0           | dn2       |          |
| tof         | 2000.0      | dpwr2     | 1        |
| nt          | 9999        | dof2      | 0        |
| ct          | 7248        | dm2       | n        |
| alock       | not used    | dmm2      | c        |
| gain        | not used    | dmf2      | 10000    |
| FLAGS       |             |           |          |
| il          | n           | dseq2     |          |
| in          | n           | dres2     | 1.0      |
| dp          | y           | homo2     | n        |
| hs          | nn          | DEC3      |          |
| DISPLAY     |             |           |          |
| sp          | -1087.8     | dfrq3     | 0        |
| wp          | 29995.3     | dn3       |          |
| vs          | 64          | dpwr3     | 1        |
| sc          | 0           | dof3      | 0        |
| wc          | 250         | dm3       | n        |
| hzmm        | 119.98      | dmm3      | c        |
| is          | 500.00      | dmf3      | 10000    |
| rfl         | 1088.7      | dseq3     |          |
| rfp         | 0           | dres3     | 1.0      |
| th          | 4           | homo3     | n        |
| PROCESSING  |             |           |          |
| ins         | 100.000     | lb        | 1.00     |
| nm          | cdc ph      | wtfile    |          |
|             |             | proc      | ft       |
|             |             | fn        | not used |
|             |             | math      | f        |
|             |             | werr      |          |
|             |             | wexp      |          |
|             |             | wbs       |          |
|             |             | wnt       |          |

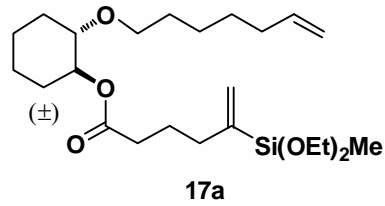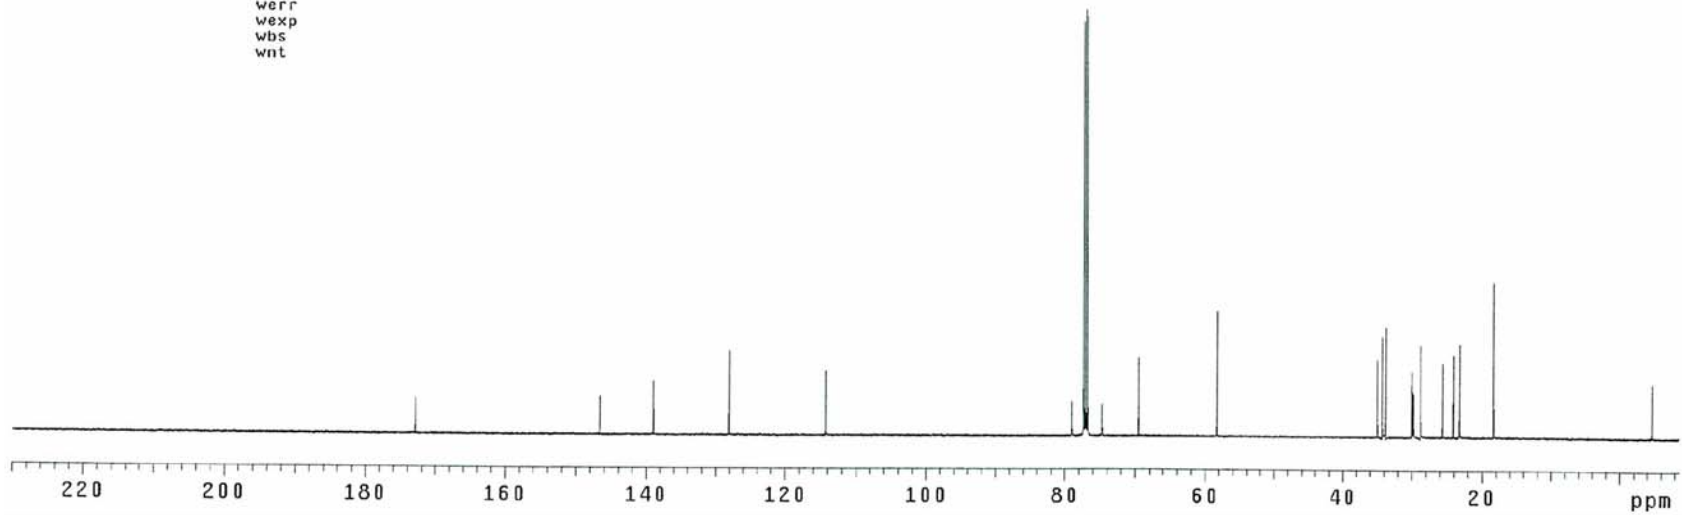

S152



WYKELN10027\_1H

exp1 s2pu1

| SAMPLE              |                | DEC. & VT  |         |
|---------------------|----------------|------------|---------|
| date                | Apr 28 2010    | dfrq       | 499.874 |
| solvent             | CDCl3          | dn         | H1      |
| file                | /export/home/~ | dpwr       | 30      |
| ds2/vnmrSYS/data/i~ |                | dof        | 0       |
| 500c/schreiber/WAN~ |                | dm         | nnn     |
| G/Pub1/WYKELN10027~ |                | dmm        | c       |
| 1H.fid              |                | dmf        | 200     |
| ACQUISITION         |                | PROCESSING |         |
| sfrq                | 499.875        | dseq       |         |
| tn                  | H1             | dres       | 1.0     |
| at                  | 2.184          | homo       | n       |
| np                  | 32768          | temp       | 25.0    |
| sw                  | 7501.2         | lb         | 1.10    |
| fb                  | not used       | wtfile     |         |
| bs                  | 4              | proc       | ft      |
| ss                  | 2              | fn         | 32768   |
| tpwr                | 62             | math       | f       |
| pw                  | 12.0           |            |         |
| d1                  | 0              | werr       |         |
| tof                 | 800.0          | wexp       |         |
| nt                  | 32             | wbs        |         |
| ct                  | 32             | wnt        | wft     |
| alock               | n              |            |         |
| gain                | not used       |            |         |
| FLAGS               |                |            |         |
| il                  | n              |            |         |
| in                  | n              |            |         |
| dp                  | y              |            |         |
| hs                  | nn             |            |         |
| DISPLAY             |                |            |         |
| sp                  | -250.2         |            |         |
| wp                  | 4998.6         |            |         |
| vs                  | 95             |            |         |
| sc                  | 0              |            |         |
| wc                  | 250            |            |         |
| hzmm                | 19.99          |            |         |
| is                  | 518.20         |            |         |
| rfl                 | 4090.3         |            |         |
| rfp                 | 3629.1         |            |         |
| th                  | 1              |            |         |
| ins                 | 1.000          |            |         |
| nm                  | ph             |            |         |

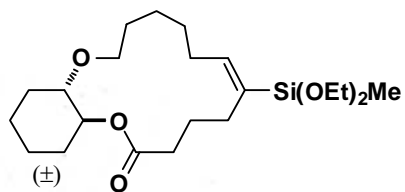

17

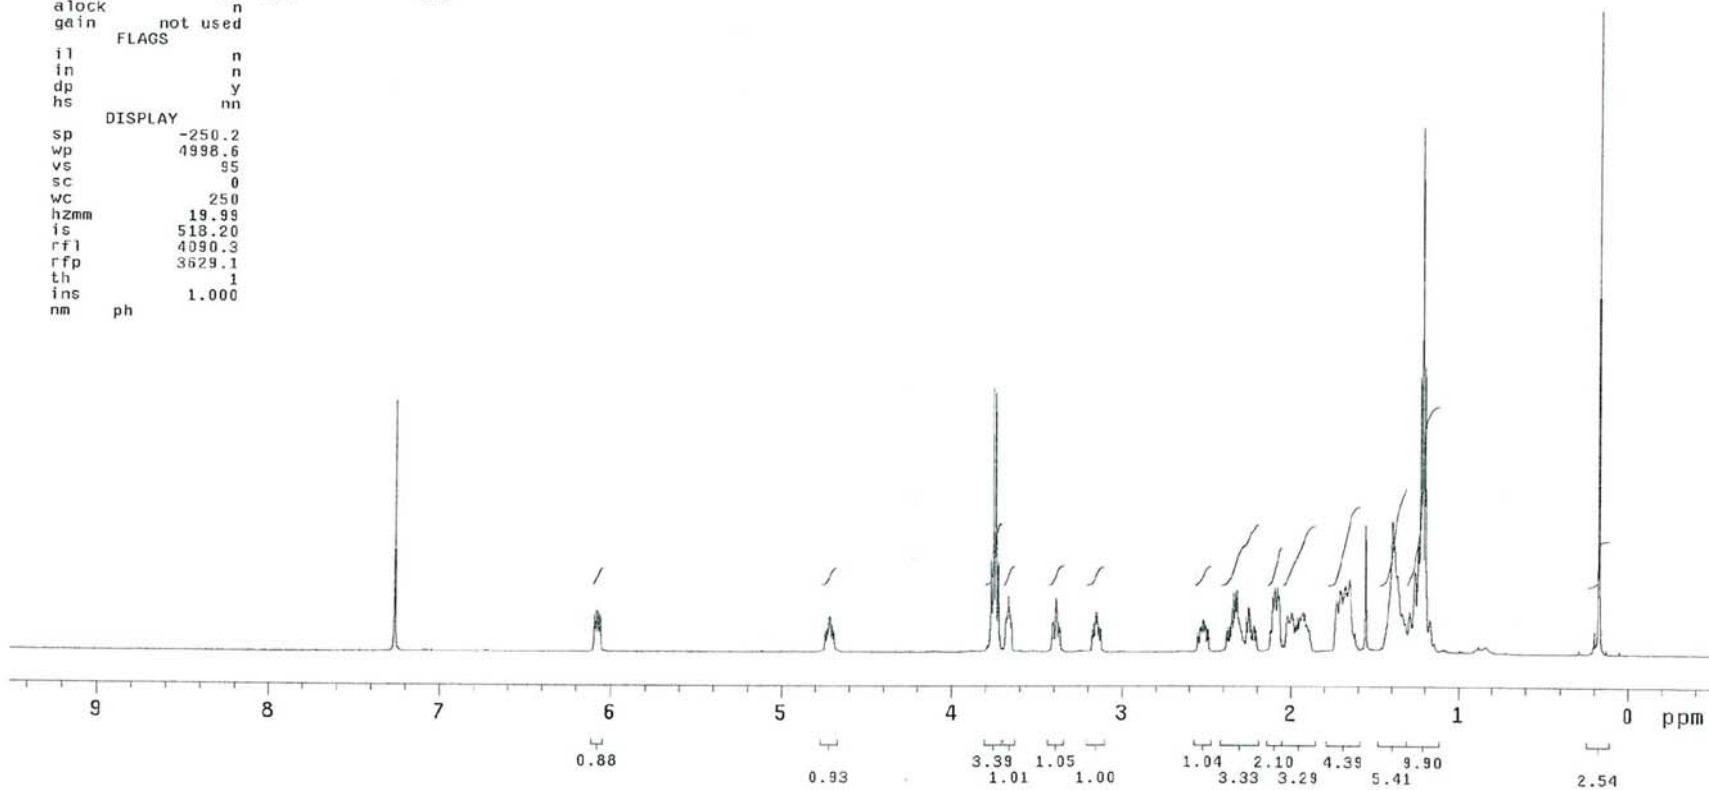

S153

WYKELN10027\_13C

exp3 s2pu1

| SAMPLE      |             | DEC. & VT |          |
|-------------|-------------|-----------|----------|
| date        | Apr 28 2010 | dfrq      | 499.874  |
| solvent     | CDC13       | dn        | H1       |
| file        | exp         | dpwr      | 48       |
| ACQUISITION |             |           |          |
| sfrq        | 125.707     | dm        | yyy      |
| tn          | C13         | dmm       | w        |
| at          | 1.092       | dmf       | 10000    |
| np          | 65536       | dseq      |          |
| sw          | 29996.3     | dres      | 1.0      |
| fb          | not used    | homo      | n        |
| bs          | 32          | temp      | 25.0     |
| tpwr        | 55          | DEC2      |          |
| pw          | 4.2         | dfrq2     | 0        |
| d1          | 0           | dn2       |          |
| tof         | 2000.0      | dpwr2     | 1        |
| nt          | 99999       | dof2      | 0        |
| ct          | 928         | dm2       | n        |
| alock       | n           | dmm2      | c        |
| gain        | not used    | dmf2      | 10000    |
| FLAGS       |             |           |          |
| il          | n           | dseq2     |          |
| in          | n           | dres2     | 1.0      |
| dp          | y           | homo2     | n        |
| hs          | nn          | DEC3      |          |
| DISPLAY     |             |           |          |
| sp          | -1086.9     | dfrq3     | 0        |
| wp          | 29995.3     | dn3       |          |
| vs          | 58          | dpwr3     | 1        |
| sc          | 0           | dof3      | 0        |
| wc          | 250         | dm3       | n        |
| h2mm        | 119.98      | dmm3      | c        |
| is          | 500.00      | dmf3      | 10000    |
| rfl         | 10766.2     | dseq3     |          |
| rfp         | 9678.3      | dres3     | 1.0      |
| th          | 5           | homo3     | n        |
| PROCESSING  |             |           |          |
| ins         | 100.000     | lb        | 1.00     |
| nm          | cdc ph      | wfile     |          |
|             |             | proc      | ft       |
|             |             | fn        | not used |
|             |             | math      | f        |
|             |             | werr      |          |
|             |             | wexp      |          |
|             |             | wbs       |          |
|             |             | wnt       |          |

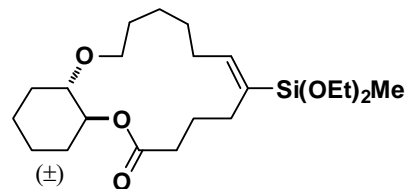

17

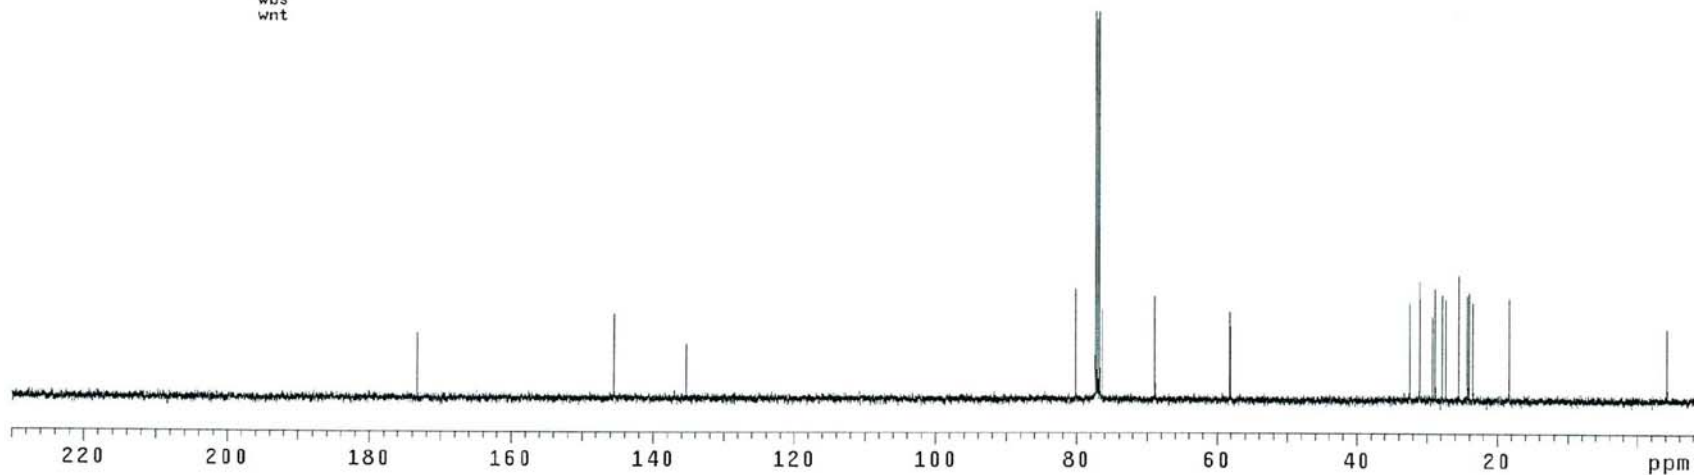

S154

WYKELN11014\_1H

exp2 s2pu1

```
SAMPLE          DEC. & VT
date   Oct 26 2010  dfrq      500.176
solvent CDC13      dn        H1
file   /export/home/~ dpwr      32
ds4/vnmrsys/data/i~ dof       0
500b/schreiber/wAN~ dm       nnn
G/Pub1/WYKELN11014~ dmm       c
_1H_secondrun.fid  dmf      8770
ACQUISITION
sfrq     500.176  dres      1.0
tn       H1      homo      n
at       2.048   temp     25.0
np       32768   PROCESSING
sw       8000.0  lb        0.10
fb       4000   wtfile
bs       16     proc      ft
ss       2      fn       not used
tpwr     58    math      f
pw       5.0
d1       0     werr
tof      0     wexp
nt      1024  wbs
ct       96   wnt
a1ock   n
gain   not used
FLAGS
il      n
in      n
dp      y
hs      nn
DISPLAY
sp      -250.1
wp      5001.5
vs      151
sc      0
wc      250
h2mm    20.01
is      126.77
rfl     5130.9
rfp     3631.3
th      1
ins     2.000
nm      ph
```

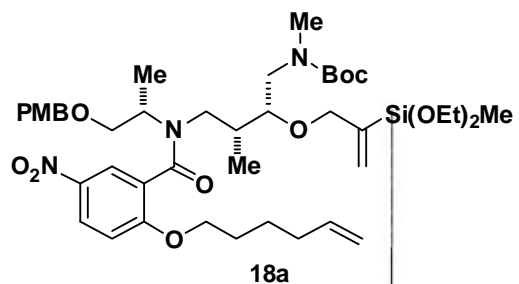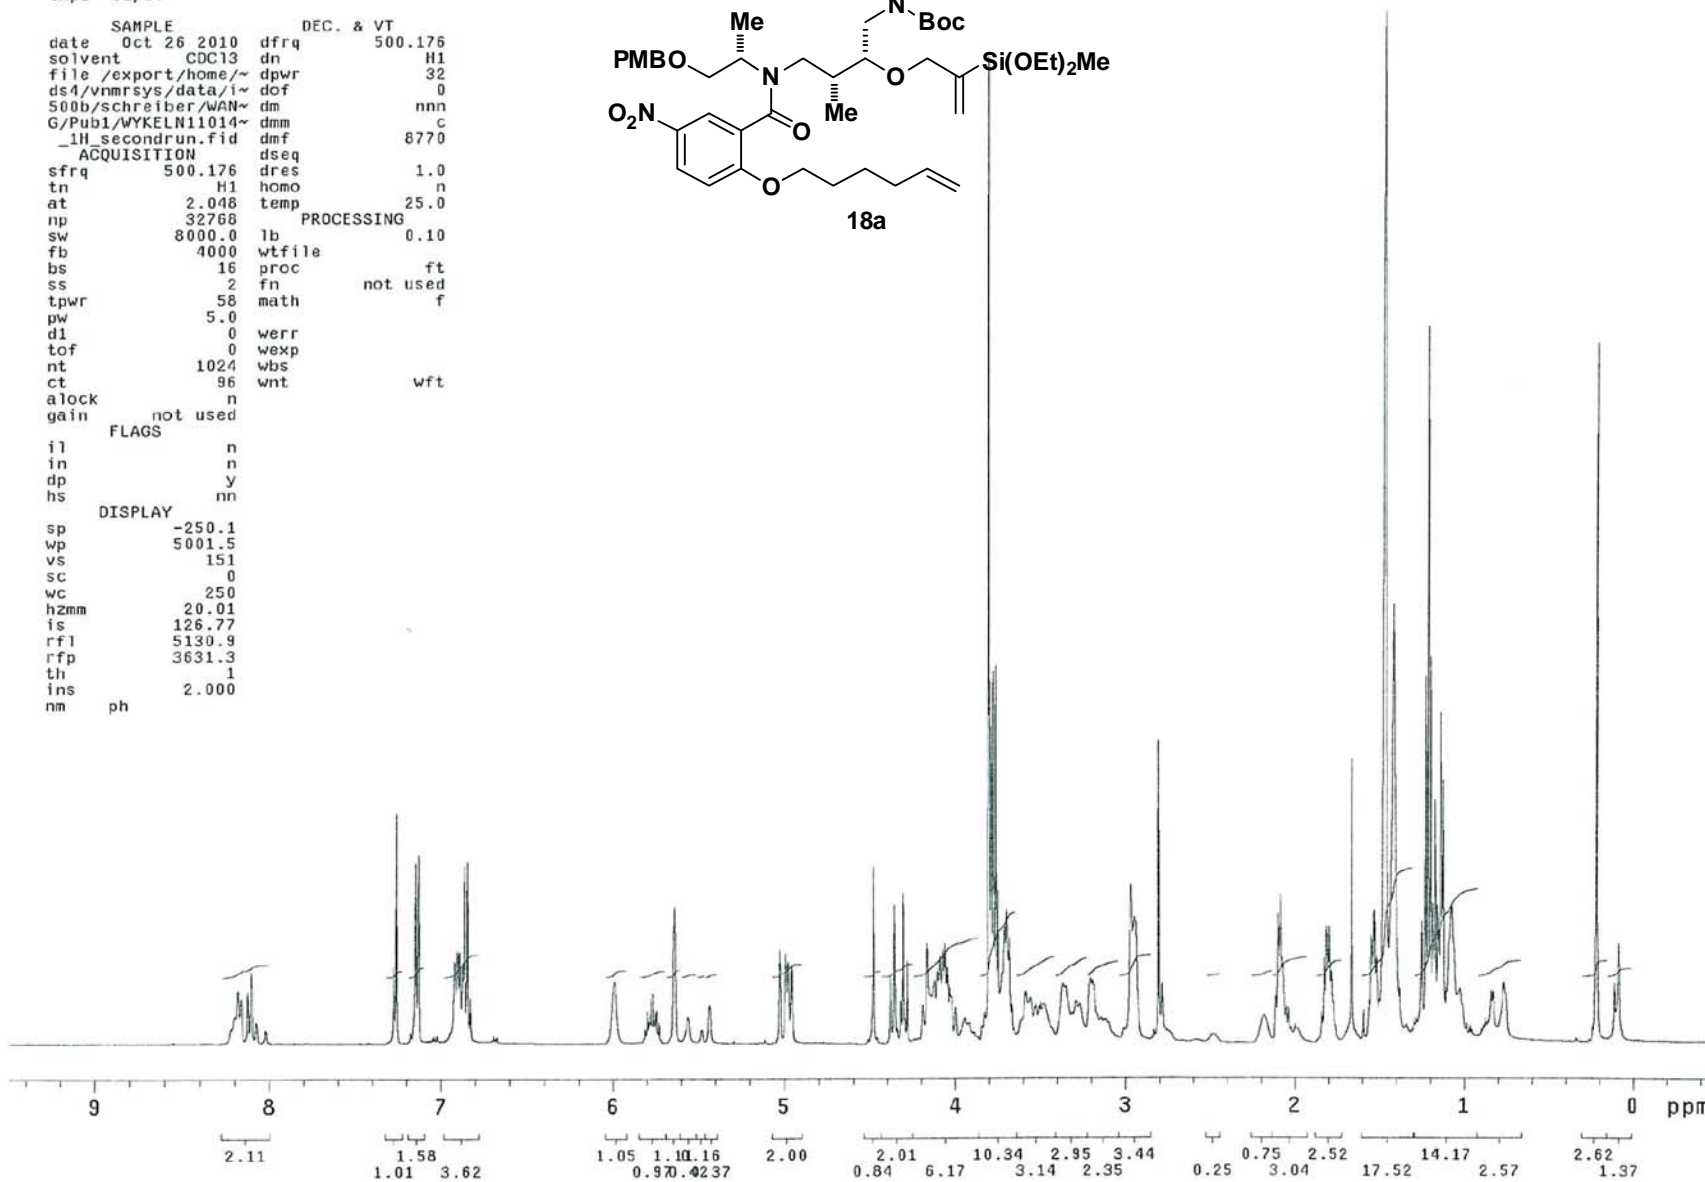

S155

WYKELN11014\_13C

exp2 s2pu1

| SAMPLE      |            | DEC. & VT  |          |
|-------------|------------|------------|----------|
| date        | Aug 3 2010 | dfrq       | 499.874  |
| solvent     | CDC13      | dn         | H1       |
| file        | exp        | dpwr       | 48       |
|             |            | dof        | 0        |
| ACQUISITION |            |            |          |
| sfrq        | 125.707    | dm         | yyy      |
| tn          | C13        | dmm        | w        |
| at          | 1.092      | dof        | 10000    |
| np          | 65536      | dseq       |          |
| sw          | 29996.3    | dres       | 1.0      |
| fb          | not used   | homo       | n        |
| bs          | 16         | temp       | 25.0     |
| tpwr        | 55         |            |          |
|             |            | DEC2       |          |
| pw          | 4.2        | dfrq2      | 0        |
| d1          | 0          | dn2        |          |
| tof         | 2000.0     | dpwr2      | 1        |
| nt          | 99999      | dof2       | 0        |
| ct          | 4400       | dm2        | n        |
| alock       | n          | dmm2       | c        |
| gain        | not used   | dmf2       | 10000    |
|             |            | DEC3       |          |
| il          | n          | dres2      | 1.0      |
| in          | n          | homo2      | n        |
| dp          | y          |            |          |
| hs          | nn         | dfrq3      | 0        |
|             |            | DEC3       |          |
| DISPLAY     |            |            |          |
| sp          | -1089.7    | dn3        | 1        |
| wp          | 29995.3    | dpwr3      | 0        |
| vs          | 166        | dof3       | n        |
| sc          | 0          | dm3        | c        |
| wc          | 250        | dmm3       | 10000    |
| hzmm        | 119.98     | dmf3       |          |
| is          | 500.00     | dseq3      | 1.0      |
| rfl         | 10768.9    | dres3      | n        |
| rfl         | 9678.3     | homo3      | n        |
| th          | 2          |            |          |
| ins         | 100.000    | PROCESSING |          |
| nm          | cdc ph     | lb         | 1.00     |
|             |            | wfile      |          |
|             |            | proc       | ft       |
|             |            | fn         | not used |
|             |            | math       | f        |
|             |            | werr       |          |
|             |            | wexp       |          |
|             |            | wbs        |          |
|             |            | wnt        |          |

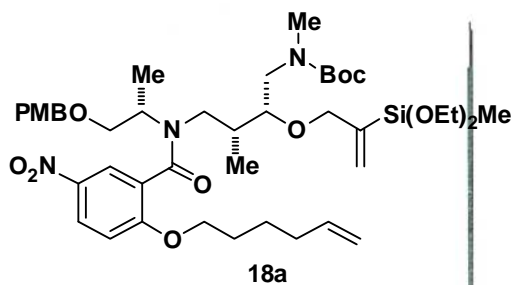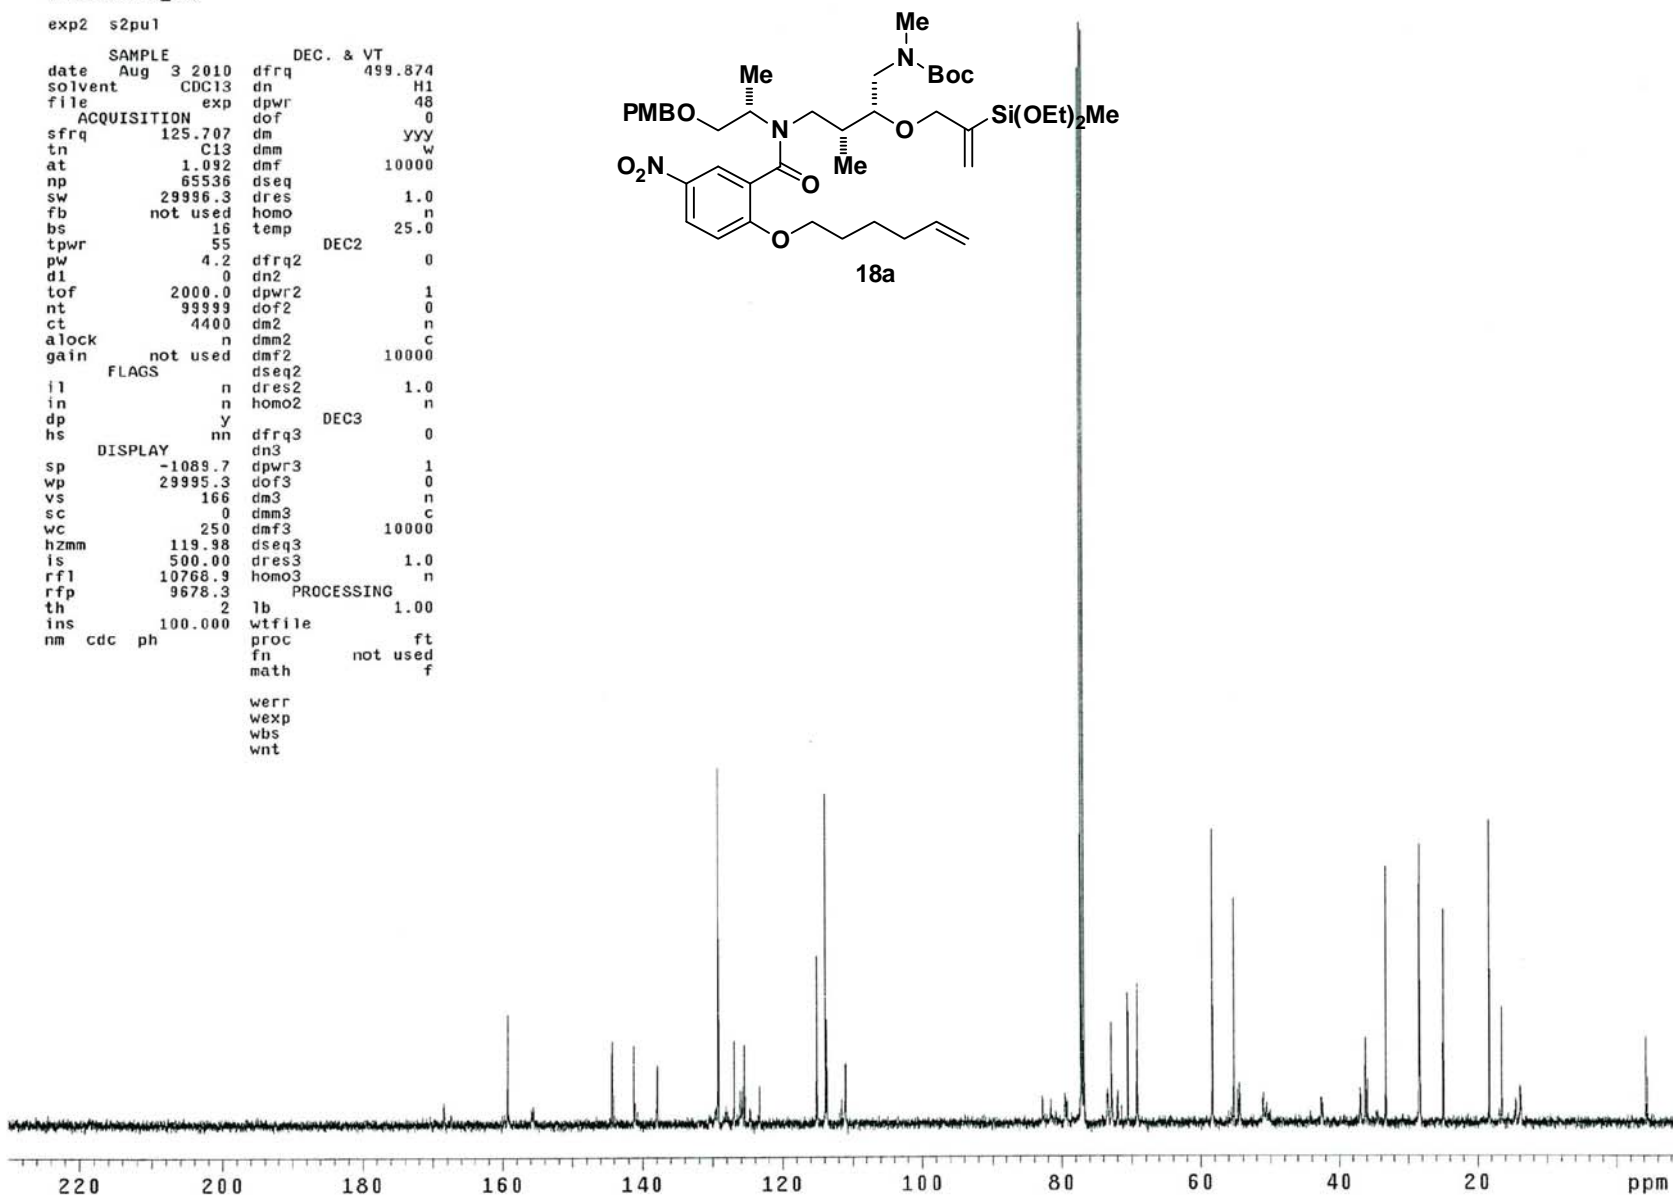

S156

WYKELN11017\_1H

exp5 s2pu1

SAMPLE DEC. & VT  
date Oct 27 2010 dfrq 500.176  
solvent CDC13 dn H1  
file exp dpwr 32  
ACQUISITION dof 0  
sfrq 500.176 dm nnn  
tn H1 dmm c  
at 2.048 dmf 8770  
np 32768 dseq  
sw 8000.0 dres 1.0  
fb 4000 homo n  
bs 4 temp 25.0  
ss 2 PROCESSING  
tpwr 58 lb 0.10  
pw 5.0 wtfile  
d1 0 proc ft  
tof 0 fn not used  
nt 32 math f  
ct 32  
alock n werr  
gain not used wexp  
FLAGS n wbs  
i1 n wnt  
in n  
dp y  
hs nn  
DISPLAY  
sp -250.1  
wp 5001.5  
vs 151  
sc 0  
wc 250  
hzmm 20.01  
ls 133.90  
rfl 1499.6  
rfp 0  
th 1  
ins 3.000  
nm ph

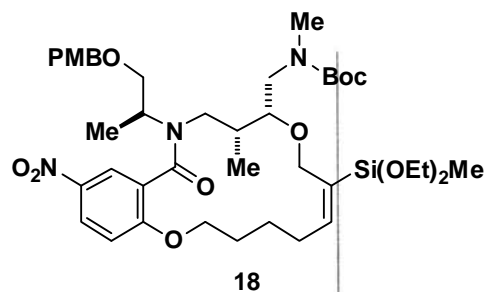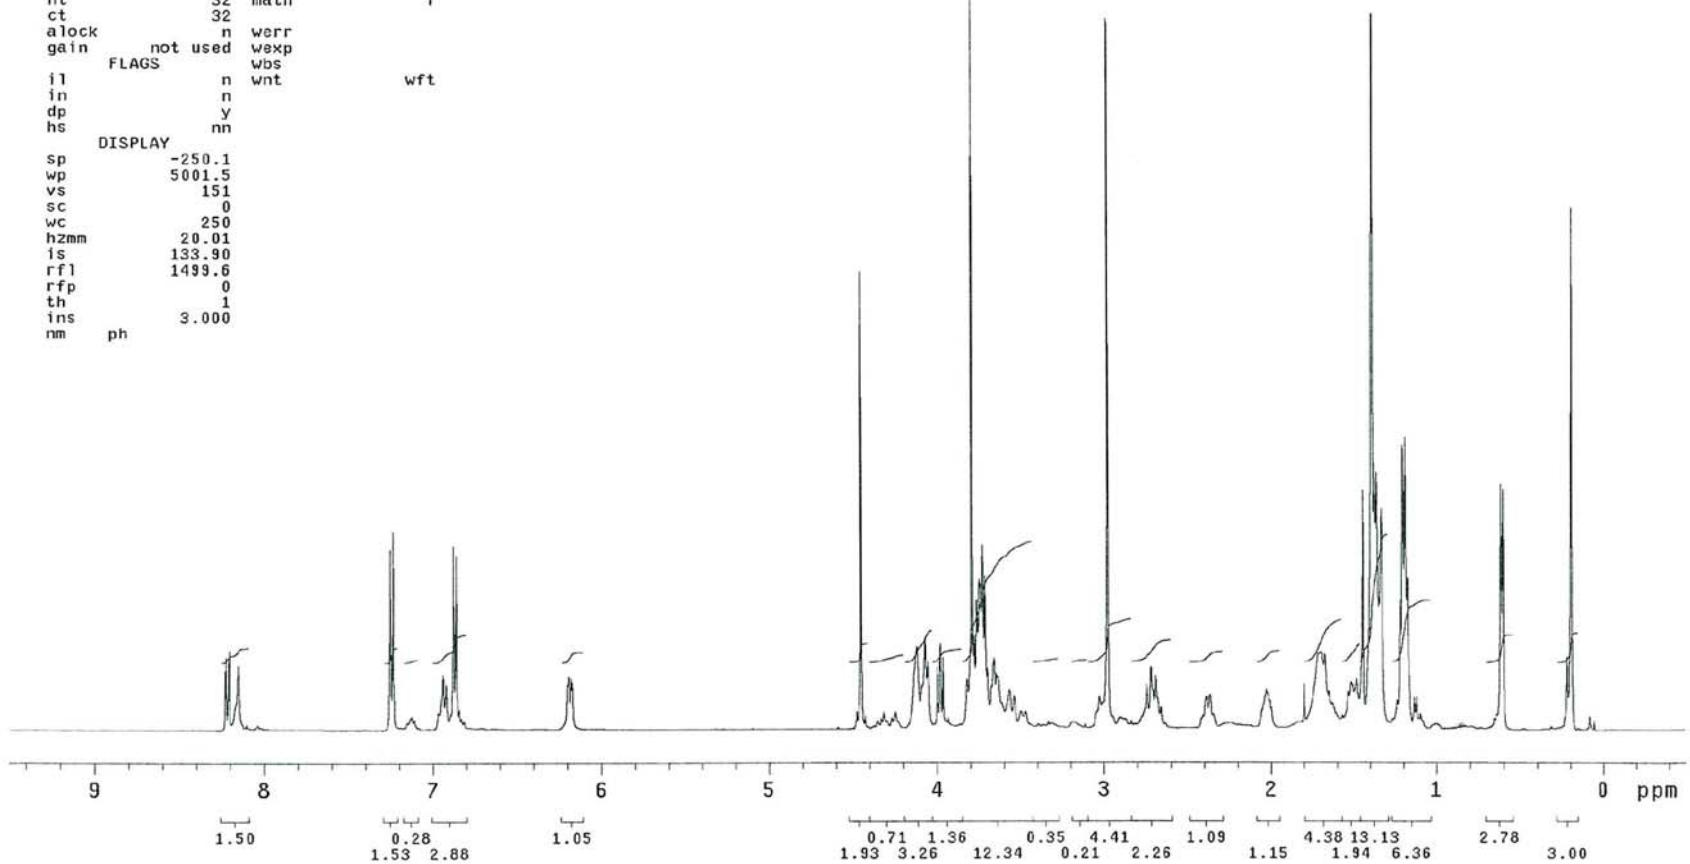

S157

WYKELN11017\_13C

exp1 s2pul

```
SAMPLE          DEC. & VT
date   Oct 28 2010  dfrq   499.874
solvent CDC13      dn      H1
file   /export/home/~ dpwr   48
ds2/vnmrsys/data/i~ dof    0
500c/schreiber/WAN~ dm     yy
G/Pub1/WYKELN11017~ dmm    w
          13C.fid  dmf     9180
ACQUISITION
sfrq   125.707  dseq    1.0
tn      C13     homo    n
at      1.092   temp    25.0
np      65536   PROCES
sw     29996.3  lb      1.00
fb      not used wtfile
bs      16      proc    ft
tpwr    55      fn     not used
pw      4.8     math    f
d1      0
tof     2000.0  werr
nt      99999  wexp
ct      2720   wbs
alock   not used wnt
gain    not used
        FLAGS
il      n
in      n
dp      y
hs      nn
        DISPLAY
sp     -1094.2
wp     29995.3
vs     118
sc      0
wc     250
hzmm   119.98
is     500.00
rf1    10773.5
rfp    9678.3
th      4
ins    100.000
nm   cdc  ph
```

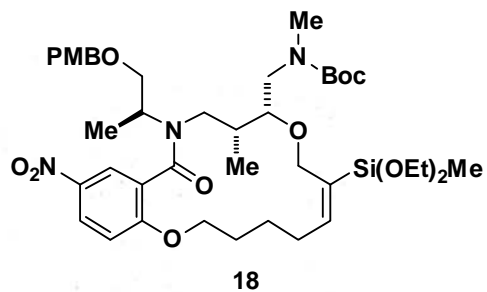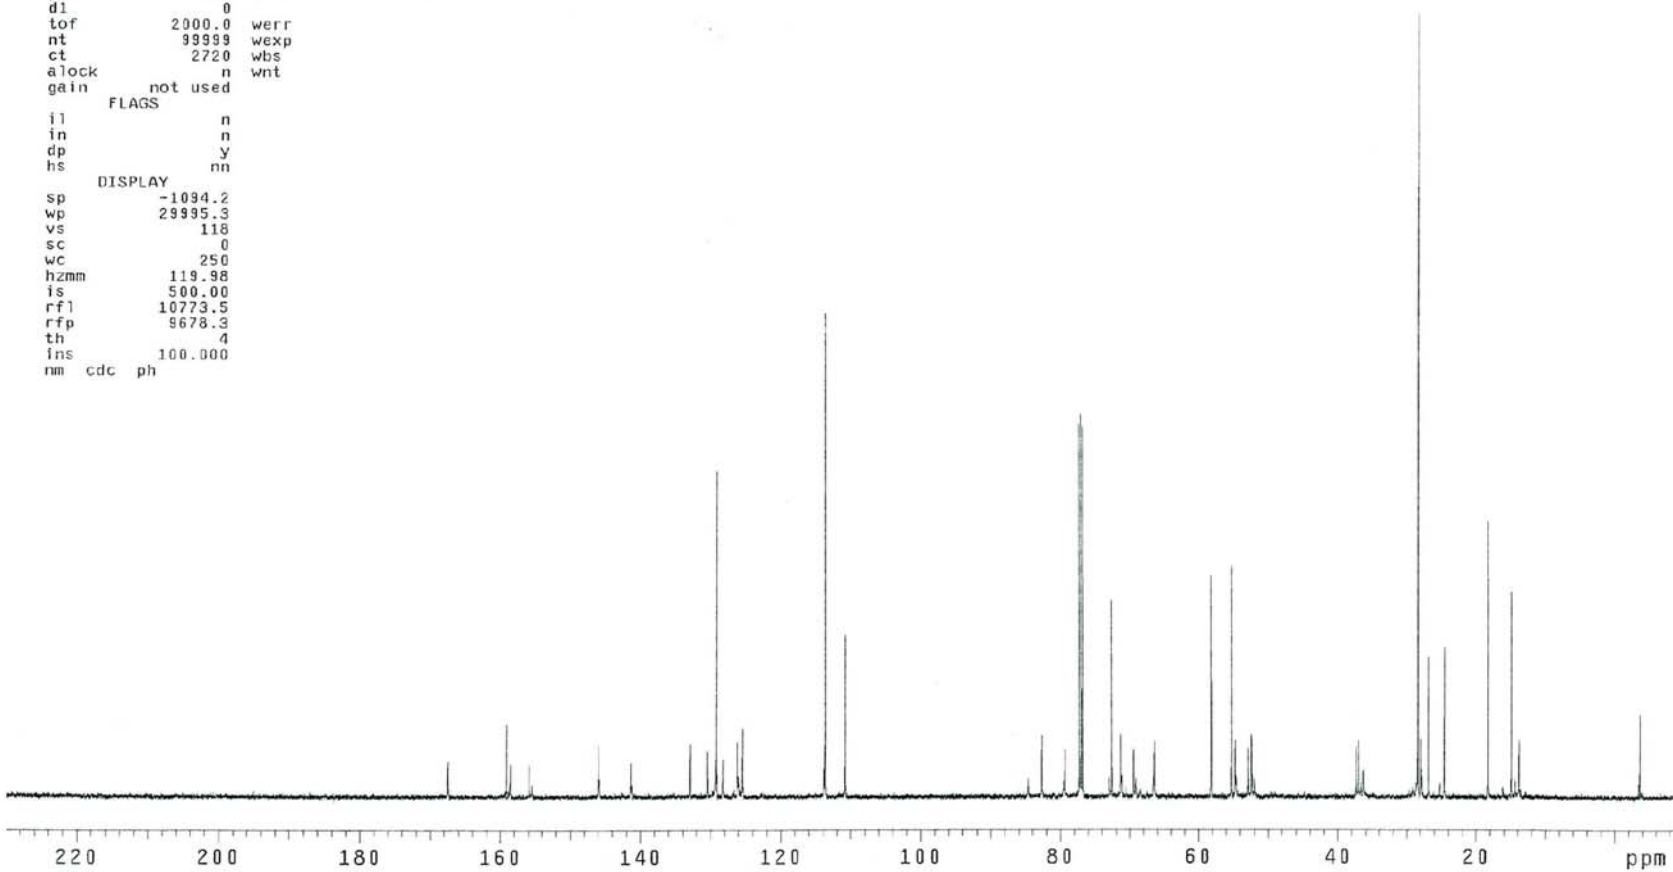

S158

VYKELN11028\_1H\_Benzene

exp1 s2pu1

SAMPLE DEC. & VT  
date Aug 6 2010 dfrq 499.874  
solvent Benzene dn H1  
file /export/home/~ dpwr 30  
ds2/vnmrsys/data/i~ dof 0  
500c/schreiber/WAN~ dm nnn  
G/Pub1/WYKELN11028~ dmm c  
1H.fid dmf 200  
ACQUISITION  
sfrq 499.875 dres 1.0  
tn H1 homo n  
at 2.184 temp 25.0  
np 32768  
sw 7501.2 lb PROCESSING 1.10  
fb not used wtfile  
bs 4 proc ft  
ss 2 fn 32768  
tpwr 62 math f  
pw 12.0  
d1 0 werr  
tof 800.0 wexp  
nt 32 wbs  
ct 16 wnt wft  
alock n  
gain not used  
FLAGS  
il n  
in n  
dp y  
hs nn  
DISPLAY  
sp -250.2  
wp 4998.6  
vs 89  
sc 0  
wc 250  
hzmm 19.99  
is 675.19  
rfl 4018.4  
rfp 3574.1  
th 7  
ins 1.000  
nm ph

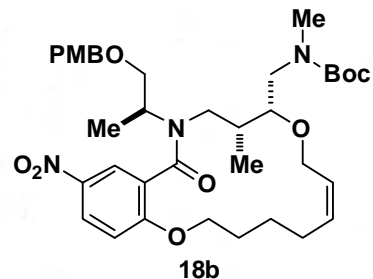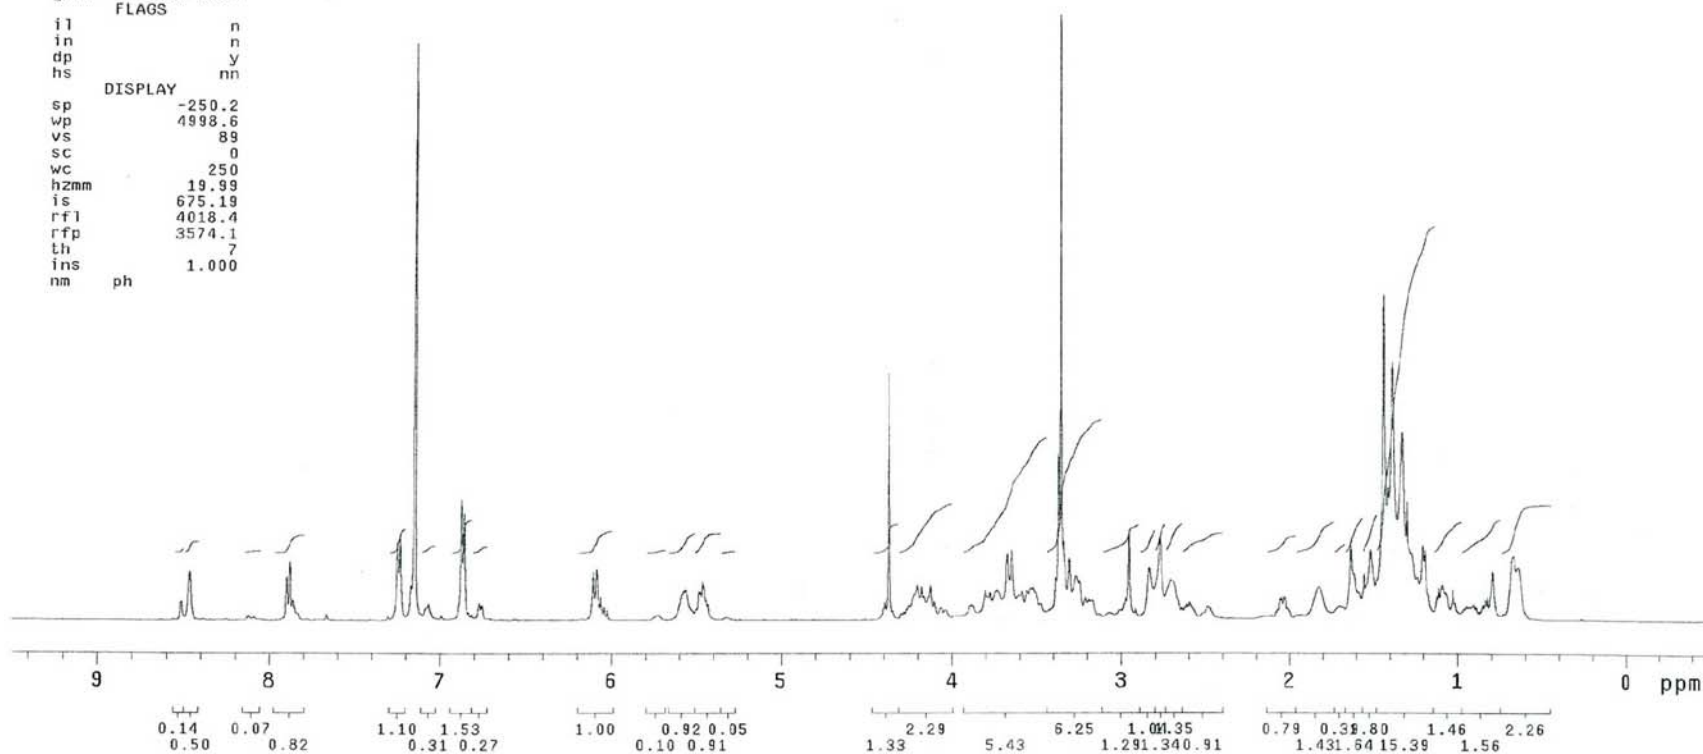

S159

WYKELN11028\_1H\_C6D6\_80C

exp1 s2pu1

| SAMPLE             |                | DEC. & VT  |          |
|--------------------|----------------|------------|----------|
| date               | Oct 30 2010    | dfrq       | 500.176  |
| solvent            | Benzene        | dn         | H1       |
| file               | /export/home/~ | dpwr       | 32       |
| ds2/vnmr           | sys/data/i~    | dof        | 0        |
| 500b/schreiber     | WAN~           | dm         | nnn      |
| G/Pub1/WYKELN11028 | ~              | dmm        | c        |
| fromdesilylation   | ~              | dmf        | 8770     |
| IH_benzene_80C.fid |                | dseq       |          |
| ACQUISITION        |                | dres       | 1.0      |
| sfrq               | 500.176        | homo       | n        |
| tn                 | H1             | temp       | 80.0     |
| at                 | 2.048          | PROCESSING |          |
| np                 | 32768          | lb         | 0.10     |
| sw                 | 8000.0         | wtfile     |          |
| fb                 | 4000           | proc       | ft       |
| bs                 | 4              | fn         | not used |
| ss                 | 2              | math       | f        |
| tpwr               | 58             |            |          |
| pw                 | 5.0            | werr       |          |
| d1                 | 0              | wexp       |          |
| tof                | 0              | wbs        |          |
| nt                 | 64             | wnt        | wft      |
| ct                 | 64             |            |          |
| alock              | n              |            |          |
| gain               | not used       |            |          |
| FLAGS              |                |            |          |
| il                 | n              |            |          |
| in                 | n              |            |          |
| dp                 | y              |            |          |
| hs                 | nn             |            |          |
| DISPLAY            |                |            |          |
| sp                 | -250.5         |            |          |
| wp                 | 5001.5         |            |          |
| vs                 | 95             |            |          |
| sc                 | 0              |            |          |
| wc                 | 250            |            |          |
| hzmm               | 20.01          |            |          |
| is                 | 363.36         |            |          |
| rfl                | 1499.0         |            |          |
| rfp                | 0              |            |          |
| th                 | 7              |            |          |
| ins                | 3.000          |            |          |
| nm                 | ph             |            |          |

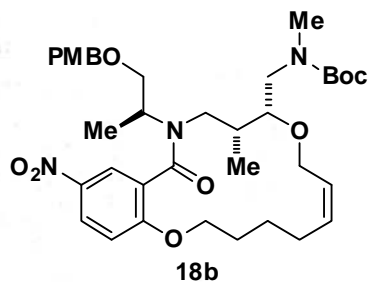

at 80 °C in C<sub>6</sub>D<sub>6</sub>

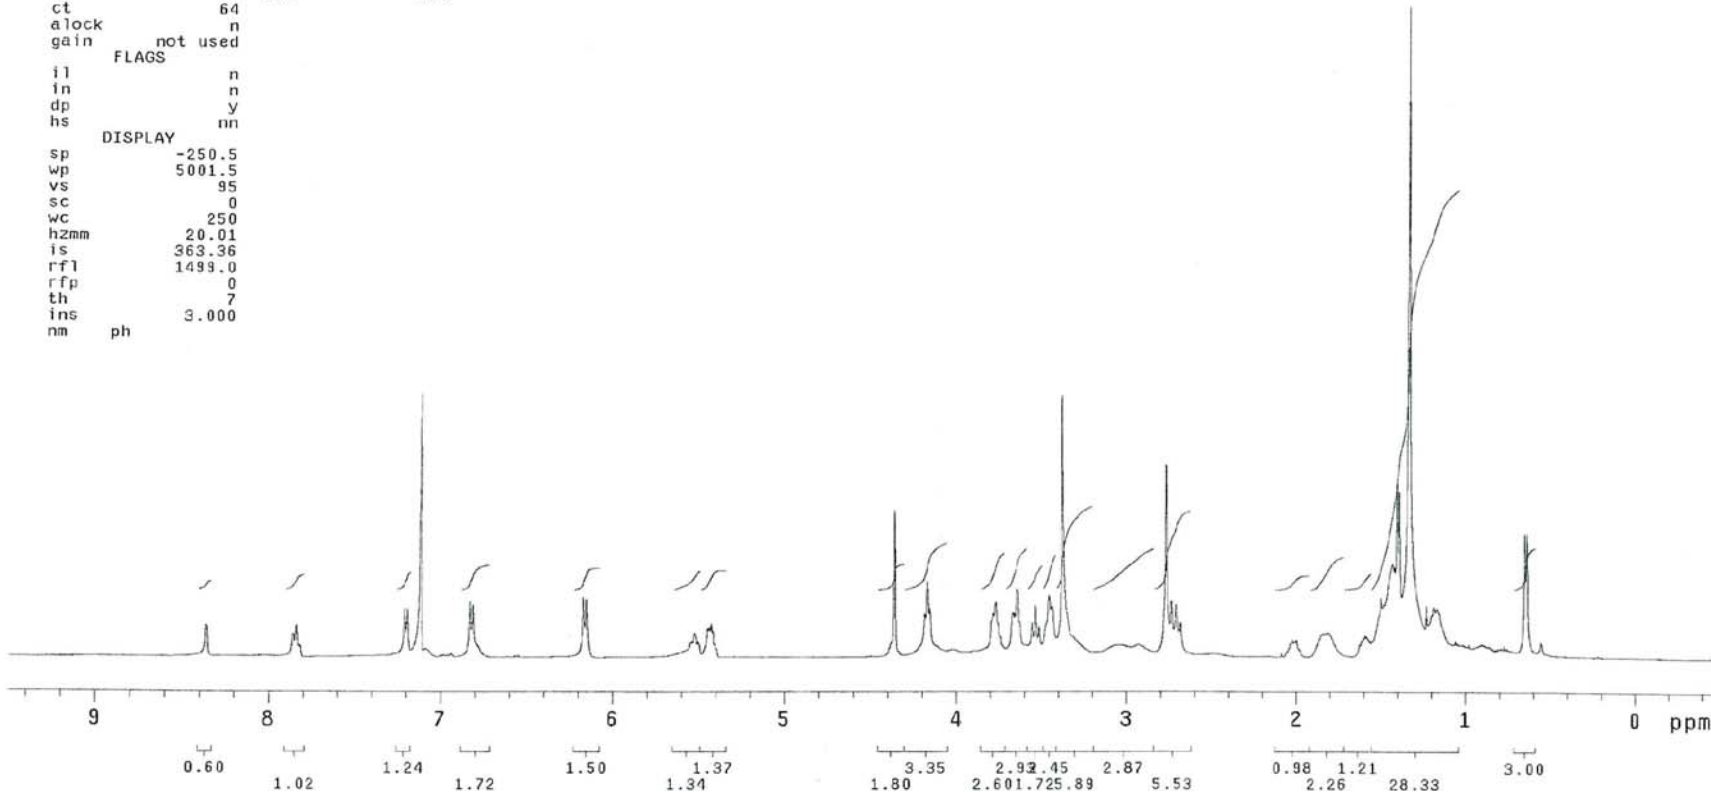

S160



WYKELN11028\_13C\_benzene

exp1 s2pu1

|                    |                |            |          |
|--------------------|----------------|------------|----------|
| SAMPLE             |                | DEC. & VT  |          |
| date               | Nov 2 2010     | dfrq       | 499.874  |
| solvent            | Benzene        | dn         | H1       |
| file               | /export/home/~ | dpwr       | 48       |
| ds2/vnmr           | sys/data/i~    | dof        | 0        |
| 500c/schreiber     | /WAN~          | dm         | yyy      |
| G/Pub1/WYKELN11028 | ~              | dmm        | w        |
| _13C_benzene.fid   |                | dmf        | 9180     |
| ACQUISITION        |                |            |          |
| sfrq               | 125.707        | dres       | 1.0      |
| tn                 | C13            | homo       | n        |
| at                 | 1.092          | temp       | 25.0     |
| np                 | 65536          | PROCESSING |          |
| sw                 | 29996.3        | lb         | 1.00     |
| fb                 | not used       | wtfile     |          |
| bs                 | 16             | proc       | ft       |
| tpwr               | 55             | fn         | not used |
| pw                 | 4.8            | math       | f        |
| d1                 | 0              |            |          |
| tof                | 2000.0         | werr       |          |
| nt                 | 99999          | wexp       |          |
| ct                 | 33552          | wbs        |          |
| alock              | n              | wnt        |          |
| gain               | not used       |            |          |
| FLAGS              |                |            |          |
| fl                 | n              |            |          |
| in                 | n              |            |          |
| dp                 | y              |            |          |
| hs                 | nn             |            |          |
| DISPLAY            |                |            |          |
| sp                 | -1044.2        |            |          |
| wp                 | 29995.3        |            |          |
| vs                 | 1545           |            |          |
| sc                 | 0              |            |          |
| wc                 | 250            |            |          |
| hzmm               | 3.98           |            |          |
| is                 | 500.00         |            |          |
| rfl                | 17133.8        |            |          |
| rfp                | 16088.7        |            |          |
| th                 | 5              |            |          |
| ins                | 100.000        |            |          |
| nm                 | cdc ph         |            |          |

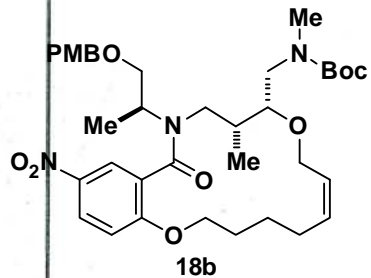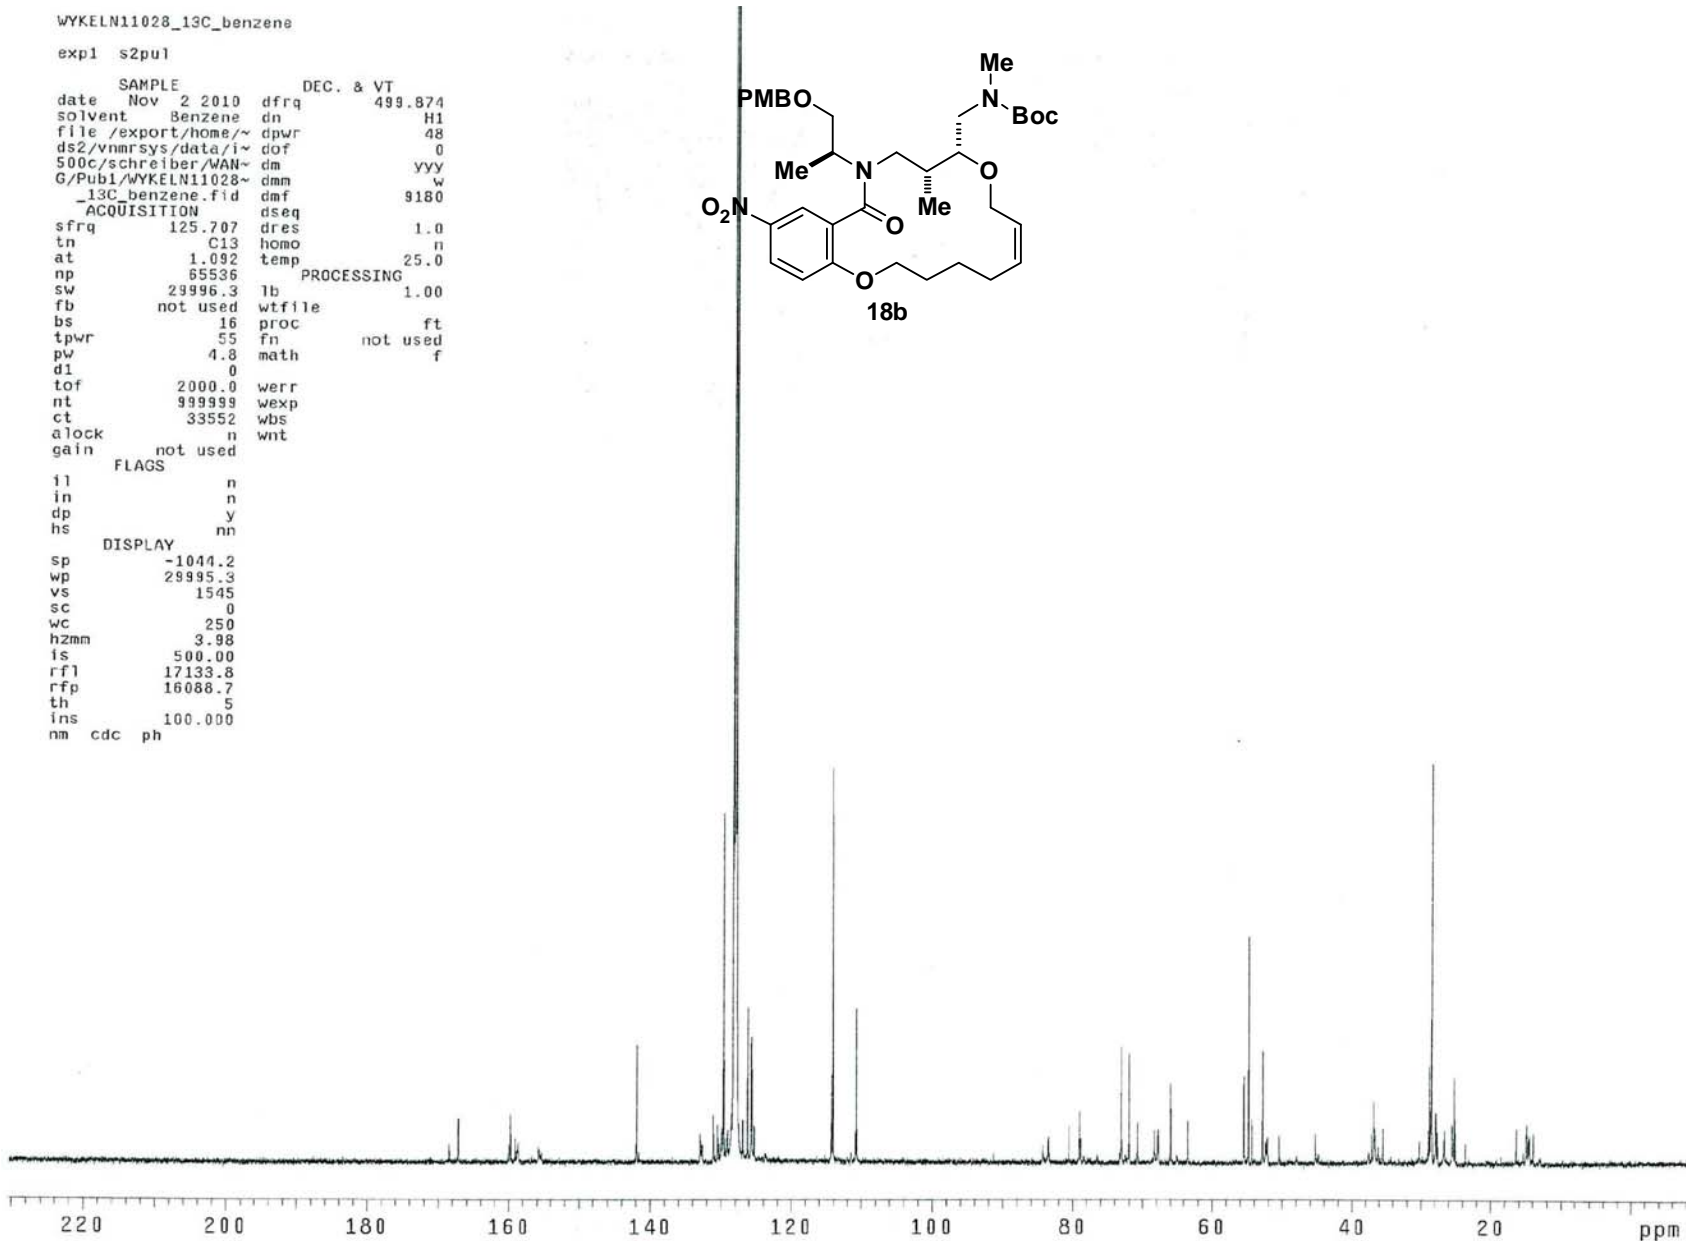

S161

WYKELN10039\_1H

expl s2pu1

| SAMPLE      |             | DEC. & VT  |          |
|-------------|-------------|------------|----------|
| date        | Nov 17 2010 | dfrq       | 500.176  |
| solvent     | CDC13       | dn         | H1       |
| file        | exp         | dpwr       | 32       |
| ACQUISITION |             |            |          |
| sfrq        | 500.176     | dm         | nnn      |
| tn          | H1          | dmm        | c        |
| at          | 2.048       | dmf        | 8770     |
| np          | 32768       | dseq       |          |
| sw          | 8000.0      | dres       | 1.0      |
| fb          | 4000        | homo       | n        |
| bs          | 4           | temp       | 24.0     |
| ss          | 2           | PROCESSING |          |
| tpwr        | 58          | lb         | 0.10     |
| pw          | 5.0         | wtfile     |          |
| d1          | 0           | proc       | ft       |
| tof         | 0           | fn         | not used |
| nt          | 32          | math       | f        |
| ct          | 32          |            |          |
| alock       | n           | werr       |          |
| gain        | not used    | wexp       |          |
| FLAGS       |             |            |          |
| il          | n           | wbs        |          |
| in          | n           | wnt        | wft      |
| dp          | y           |            |          |
| hs          | nn          |            |          |
| DISPLAY     |             |            |          |
| sp          | -250.1      |            |          |
| wp          | 5001.5      |            |          |
| vs          | 65          |            |          |
| sc          | 0           |            |          |
| wc          | 250         |            |          |
| hzmm        | 20.01       |            |          |
| is          | 220.05      |            |          |
| rfl         | 5127.4      |            |          |
| rfp         | 3631.3      |            |          |
| th          | 2           |            |          |
| ins         | 2.000       |            |          |
| nm          | ph          |            |          |

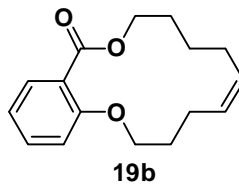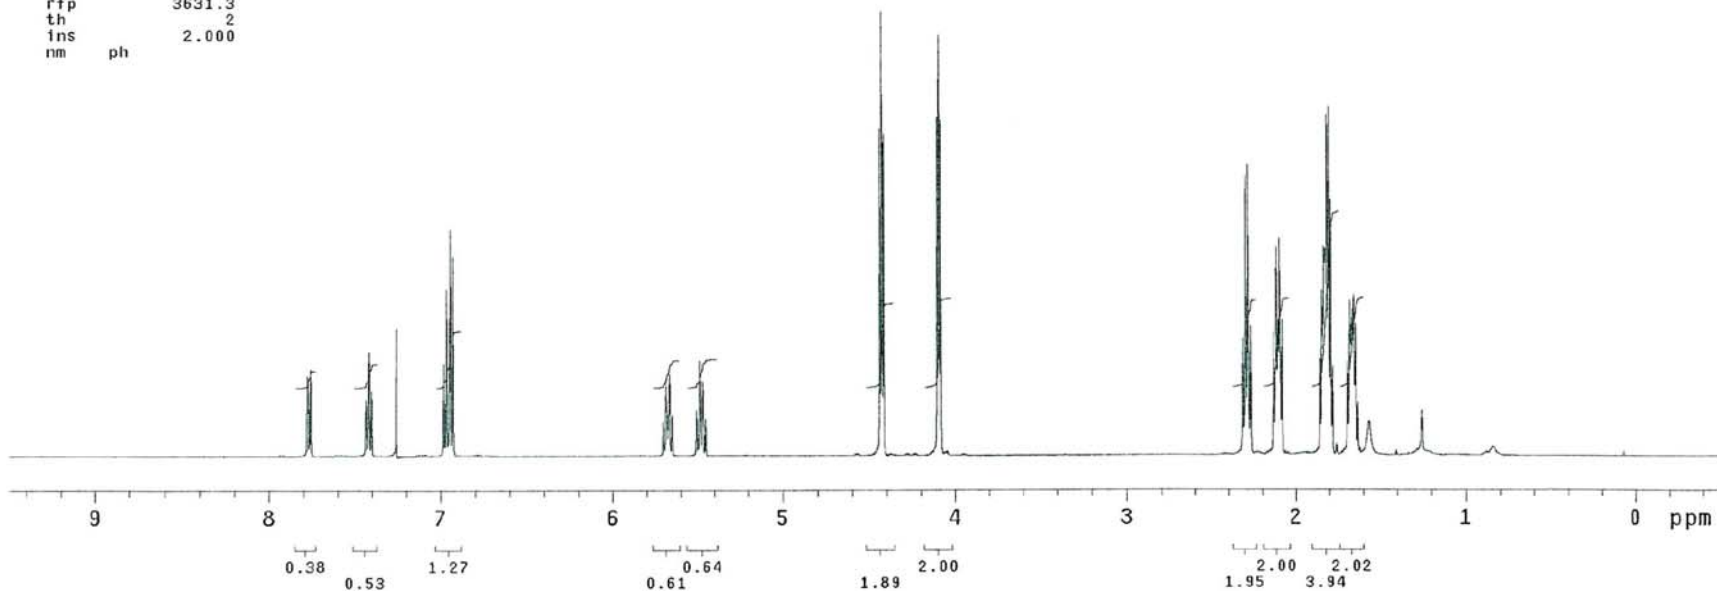

S162

WYKELN10039\_13C

exp4 s2pu1

| SAMPLE      |             | DEC. & VT |          |
|-------------|-------------|-----------|----------|
| date        | Nov 17 2010 | dfrq      | 499.874  |
| solvent     | CDC13       | dn        | H1       |
| file        | exp         | dpwr      | 48       |
| ACQUISITION |             |           |          |
| sfrq        | 125.707     | dm        | yyy      |
| tn          | C13         | dmm       | w        |
| at          | 1.092       | dmf       | 9180     |
| np          | 65536       | dseq      |          |
| sw          | 29996.3     | dres      | 1.0      |
| fb          | not used    | homo      | n        |
| bs          | 16          | temp      | 25.0     |
| tpwr        | 55          | DEC2      |          |
| pw          | 4.8         | dfrq2     | 0        |
| d1          | 0           | dn2       |          |
| tof         | 2000.0      | dpwr2     | 1        |
| nt          | 99999       | dof2      | 0        |
| ct          | 1104        | dm2       | n        |
| alock       | n           | dmm2      | c        |
| gain        | not used    | dmf2      | 10000    |
| FLAGS       |             |           |          |
| il          | n           | dseq2     |          |
| in          | n           | dres2     | 1.0      |
| dp          | y           | homo2     | n        |
| hs          | nn          | DEC3      |          |
| DISPLAY     |             |           |          |
| sp          | -1086.9     | dfrq3     | 0        |
| wp          | 29995.3     | dn3       |          |
| vs          | 54          | dpwr3     | 1        |
| sc          | 0           | dof3      | 0        |
| wc          | 250         | dm3       | n        |
| hzmm        | 5.10        | dmm3      | c        |
| is          | 500.00      | dmf3      | 10000    |
| rfl         | 10766.2     | dseq3     |          |
| rfp         | 9678.3      | dres3     | 1.0      |
| th          | 3           | homo3     | n        |
| PROCESSING  |             |           |          |
| ins         | 100.000     | lb        | 1.00     |
| nm          | cdc ph      | wtfile    |          |
|             |             | proc      | ft       |
|             |             | fn        | not used |
|             |             | math      | f        |
|             |             | werr      |          |
|             |             | wexp      |          |
|             |             | wbs       |          |
|             |             | wnt       |          |

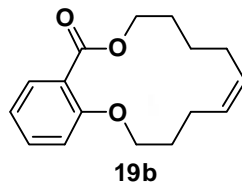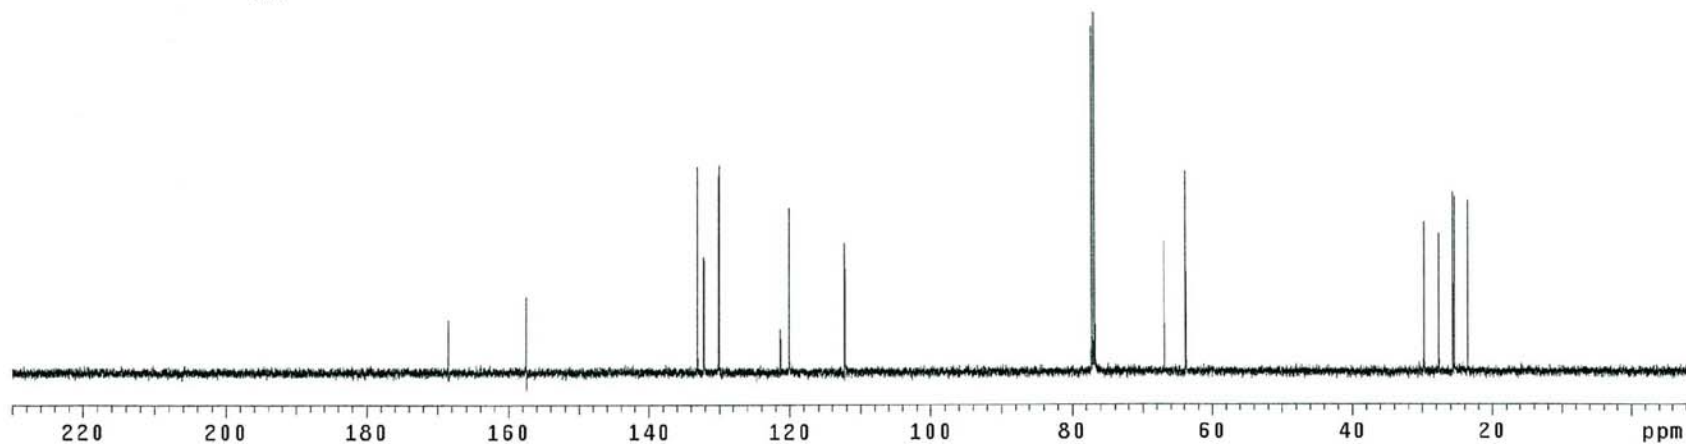

S163

WYKELN10002\_1H

exp1 s2pu1

```

SAMPLE
date Nov 17 2010 dfrq 500.176
solvent CDCl3 dn H1
file /export/home/~ dpwr 32
ds2/vnmrsys/data/i~ dof 0
500b/schreiber/WAN~ dm nnn
G/Pub1/WYKELN10002~ dmm c
1H.fid dmf 8770
ACQUISITION
sfrq 500.176 dres 1.0
tn H1 homo n
at 2.048 temp 24.0
np 32768
sw 8000.0 lb 0.10
fb 4000 wtfile
bs 4 proc ft
ss 2 fn not used
tpwr 58 math f
pw 5.0
dl 0 werr
tof 0 wexp
nt 32 wbs
ct 32 wnt wft
a lock n
gain not used
FLAGS
il n
in n
dp y
hs nn
DISPLAY
sp -250.1
wp 5001.5
vs 59
sc 0
wc 250
hzmm 20.01
is 173.80
rf1 5131.8
rfp 3631.3
th 5
ins 2.000
nm ph

```

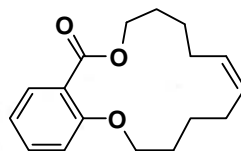

20b

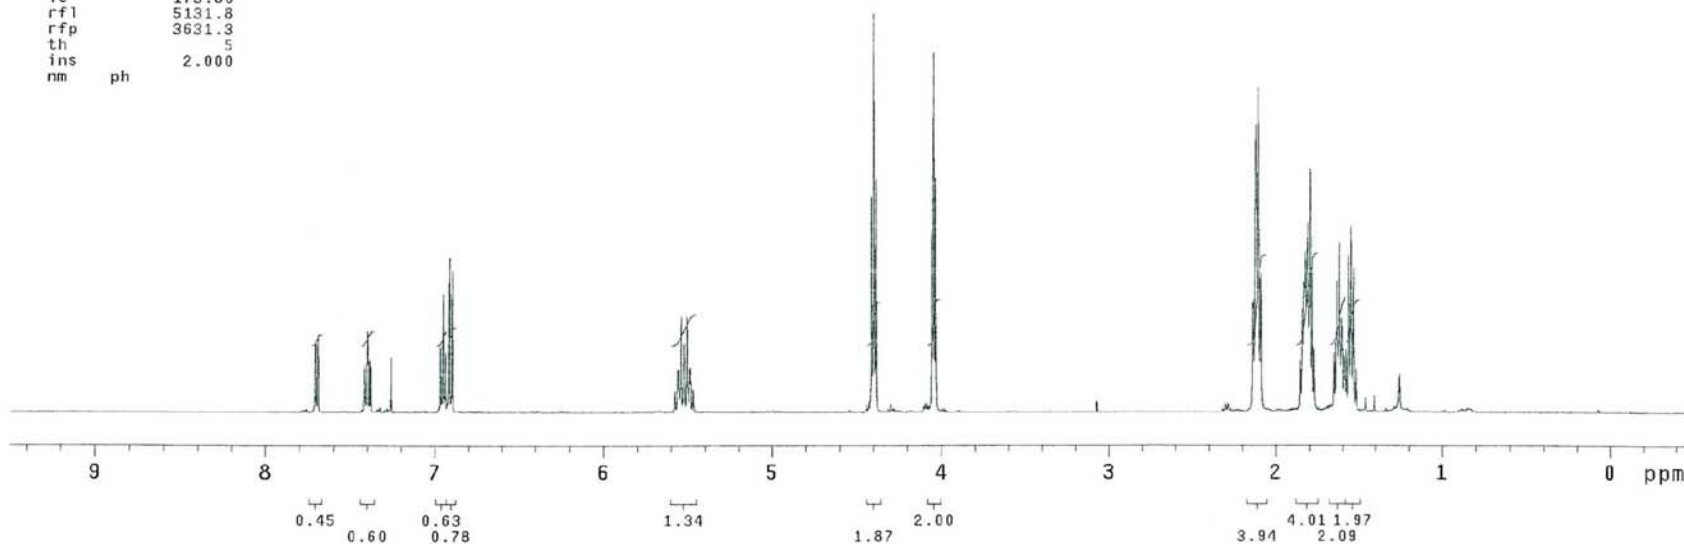

S164

WYKELN10002\_13C

exp3 s2pu1

```
SAMPLE          DEC. & VT
date Nov 17 2010 dfrq      499.874
solvent CDC13     dn        H1
file exp         dpwr      48
ACQUISITION     dof        0
sfrq 125.707    dm         yyy
tn C13          dmm        w
at 1.092        dmf        9180
np 65536        dseq
sw 29996.3     dres      1.0
fb not used    homo      n
bs 16          temp     25.0
tpwr 55        DEC2
pw 4.8         dfrq2     0
d1 0           dn2
tof 2000.0     dpwr2     1
nt 999999     dof2      0
ct 1440       dm2       n
alock not used dmm2      c
gain not used dmf2     10000
          dseq2
i1 n          dres2     1.0
in n          homo2    n
dp y          DEC3
hs nn         dfrq3     0
          dn3
DISPLAY      dpwr3     1
sp -1088.7     dof3      0
wp 29995.3    dm3       n
vs 27         dmm3      c
sc 0          dmf3     10000
wc 250        dseq3
h2mm 119.98   dres3     1.0
is 500.00    homo3    n
rfl 10768.0  PROCESSING
rfp 9678.3   lb        1.00
th 4         wtfile
ins 100.000  proc      ft
nm cdc ph   fn      not used
          math     f
          werr
          wexp
          wbs
          wnt
```

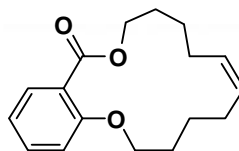

20b

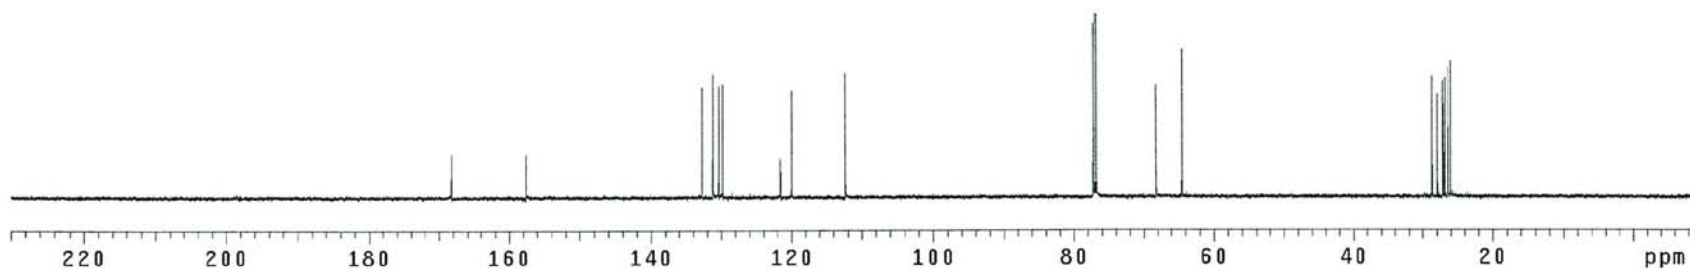

S165

WYKELN11015\_1H

exp3 s2pu1

|             |             |            |          |
|-------------|-------------|------------|----------|
| SAMPLE      |             | DEC. & VT  |          |
| date        | Oct 26 2010 | dfrq       | 500.176  |
| solvent     | CDC13       | dn         | H1       |
| file        | exp         | dpwr       | 32       |
| ACQUISITION |             |            |          |
| sfrq        | 500.176     | dm         | nnn      |
| tn          | H1          | dmm        | c        |
| at          | 2.048       | dmf        | 8770     |
| np          | 32768       | dseq       |          |
| sw          | 8000.0      | dres       | 1.0      |
| fb          | 4000        | homo       | n        |
| bs          | 16          | temp       | 25.0     |
| ss          | 2           | PROCESSING |          |
| tpwr        | 58          | lb         | 0.10     |
| pw          | 5.0         | wtfile     |          |
| d1          | 0           | proc       | ft       |
| tof         | 0           | fn         | not used |
| nt          | 1024        | math       | f        |
| ct          | 256         |            |          |
| alock       | n           | werr       |          |
| gain        | not used    | wexp       |          |
| FLAGS       |             |            |          |
| il          | n           | wbs        |          |
| in          | n           | wnt        | wft      |
| dp          | y           |            |          |
| hs          | nn          |            |          |
| DISPLAY     |             |            |          |
| sp          | -250.1      |            |          |
| wp          | 5001.5      |            |          |
| vs          | 151         |            |          |
| sc          | 0           |            |          |
| wc          | 250         |            |          |
| hzmm        | 20.01       |            |          |
| is          | 126.77      |            |          |
| rfl         | 5130.4      |            |          |
| rff         | 3631.3      |            |          |
| th          | 1           |            |          |
| ins         | 3.000       |            |          |
| nm          | ph          |            |          |

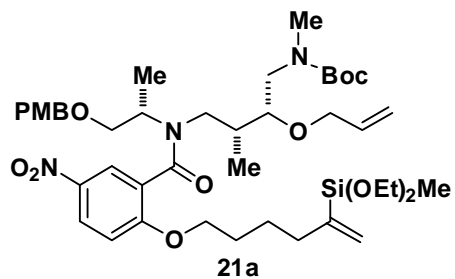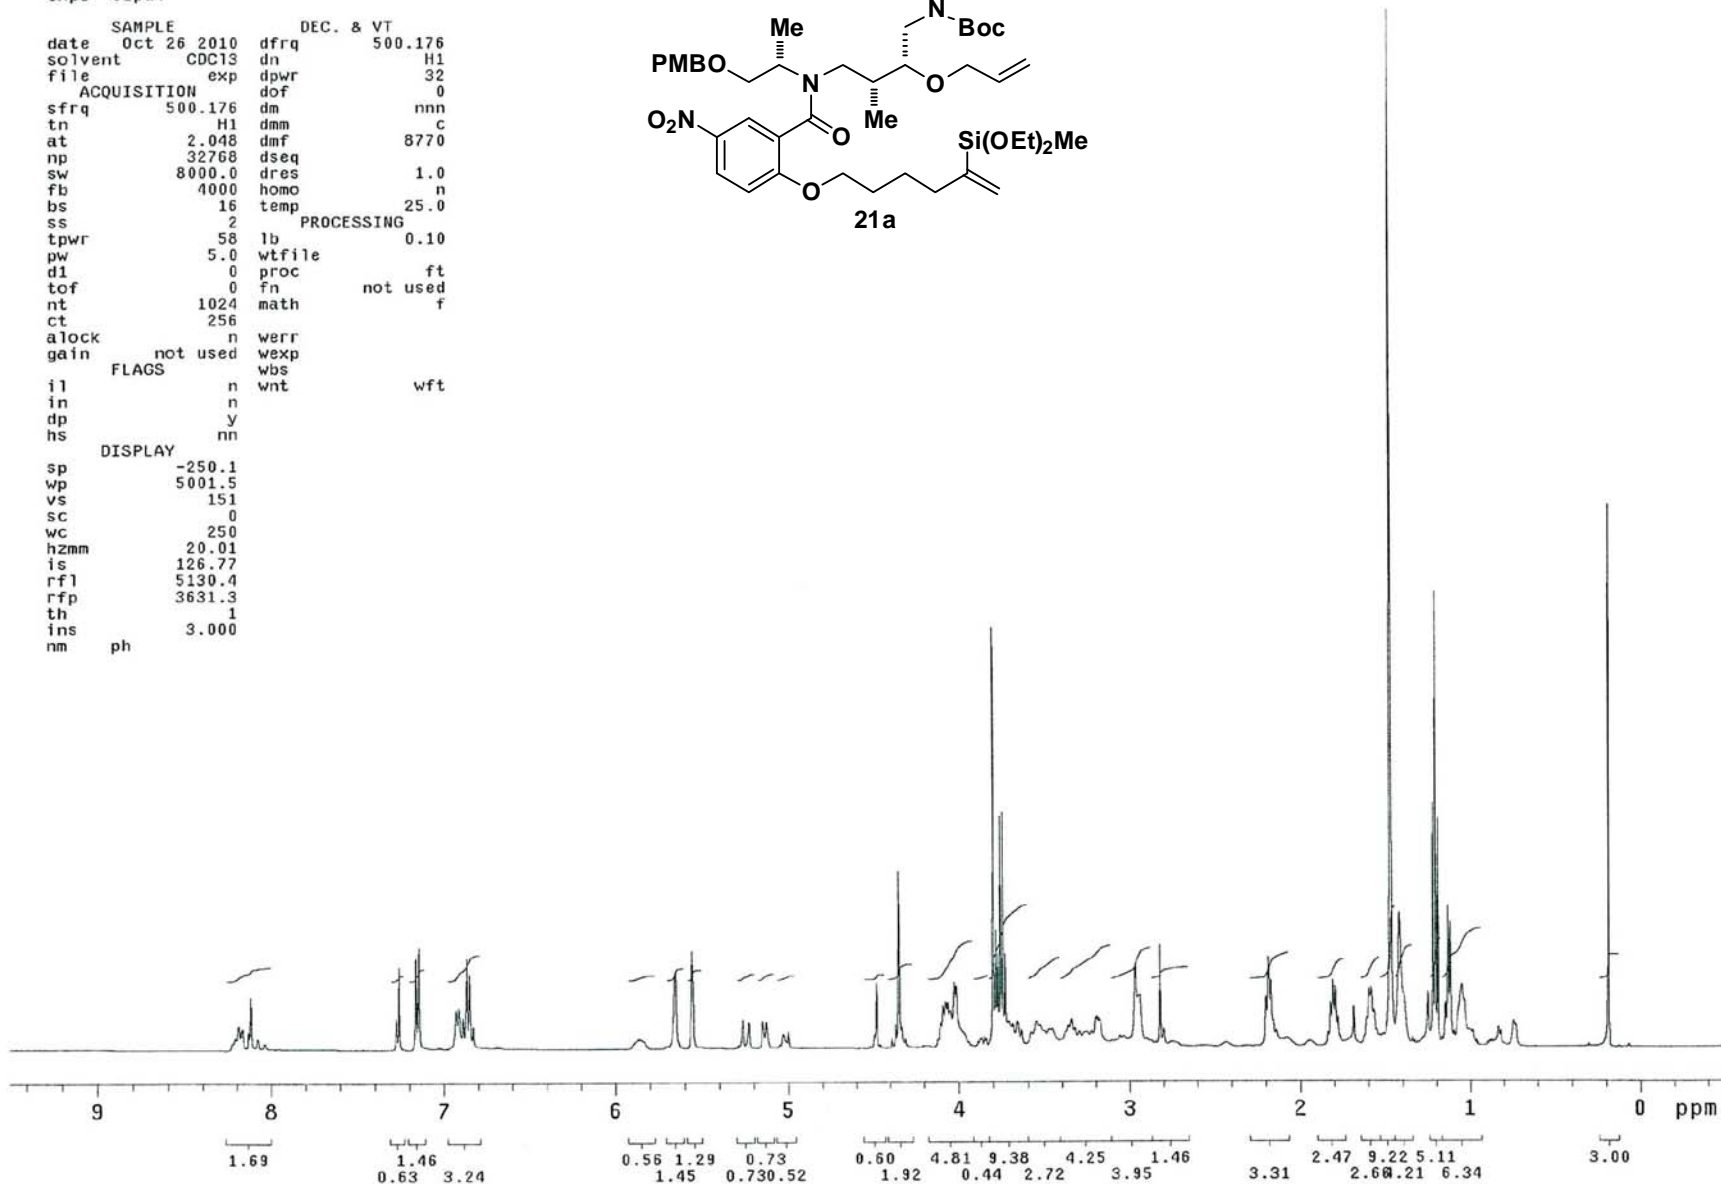

S166

WYKELN11015\_13C

expl s2pu1

```

SAMPLE          DEC. & VT
date   Oct 26 2010  dfrq   499.874
solvent CDC13      dn      H1
file   /export/home/~ dpwr   48
ds2/vnmrsys/data/~  dof    0
500C/schreiber/WAN~ dm     yyy
G/Pub1/WYKELN11015~ dmm    w
13C.fid          dmf     9180
ACQUISITION
sfrq    125.707  dres    1.0
tn      C13     homo    n
at      1.092   temp    25.0
np      65536   PROCES
sw      29996.3 lb      1.00
fb      not used wtfle
bs      16     proc    ft
tpwr    55     fn      not used
pw      4.8    math
d1      0
tof     2000.0 werr
nt     999999 wexp
ct     36144  wbs
alock   not used n wnt
gain    not used
        FLAGS
il      n
in      n
dp      y
hs      nn
        DISPLAY
sp      -1090.6
wp      29995.3
vs      52
sc      0
wc      250
hzmm    119.98
is      500.00
rfl     10769.8
rfp     9678.3
th      58
ins     100.000
nm      cdc  ph

```

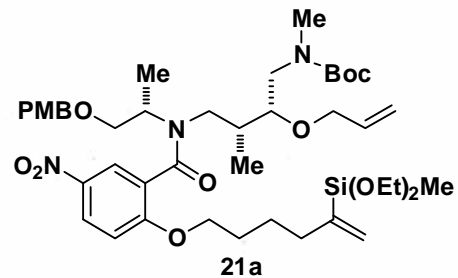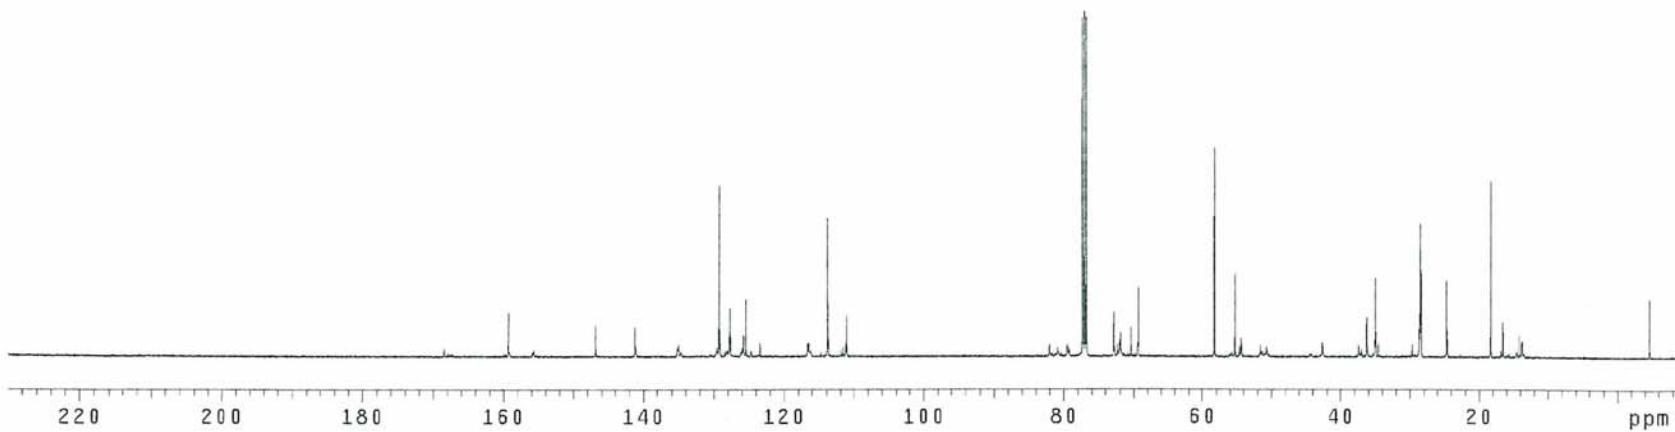

S167

WYKELN11018\_1H

exp1 s2pu1

```
SAMPLE          DEC. & VT
date    Oct 27 2010  dfrq    499.874
solvent  CDC13      dn      H1
file    /export/home/~ dpwr    30
ds2/vnmrsys/data/1~  dof     0
500c/schreiber/WAN~  dm     nnn
G/Pub1/WYKELN11018~  dmm    c
1H.fid      dmf     200
ACQUISITION
sfrq    499.875  dres    1.0
tn      H1      homo    n
at      2.184   temp    25.0
np      32768
sw      7501.2  lb      1.10
fb      not used
bs      8      proc    ft
ss      2      fn      32768
tpwr    62    math    f
pw      12.0
d1      0     werr
tof     800.0 wexp
nt      16   wbs
ct      16   wnt
alock   n
gain    not used
FLAGS
il      n
in      n
dp      y
hs      nn
DISPLAY
sp      -250.1
wp      4998.6
vs      96
sc      0
wc      250
hzmh    19.99
is      347.32
rfl     451.1
rfp     0
th      7
ins     1.000
nm      ph
```

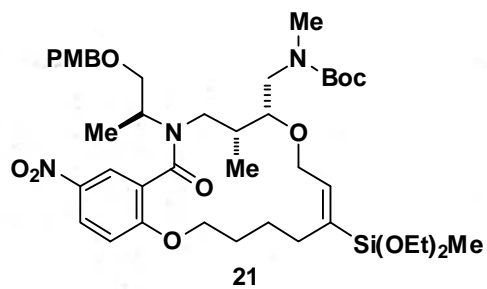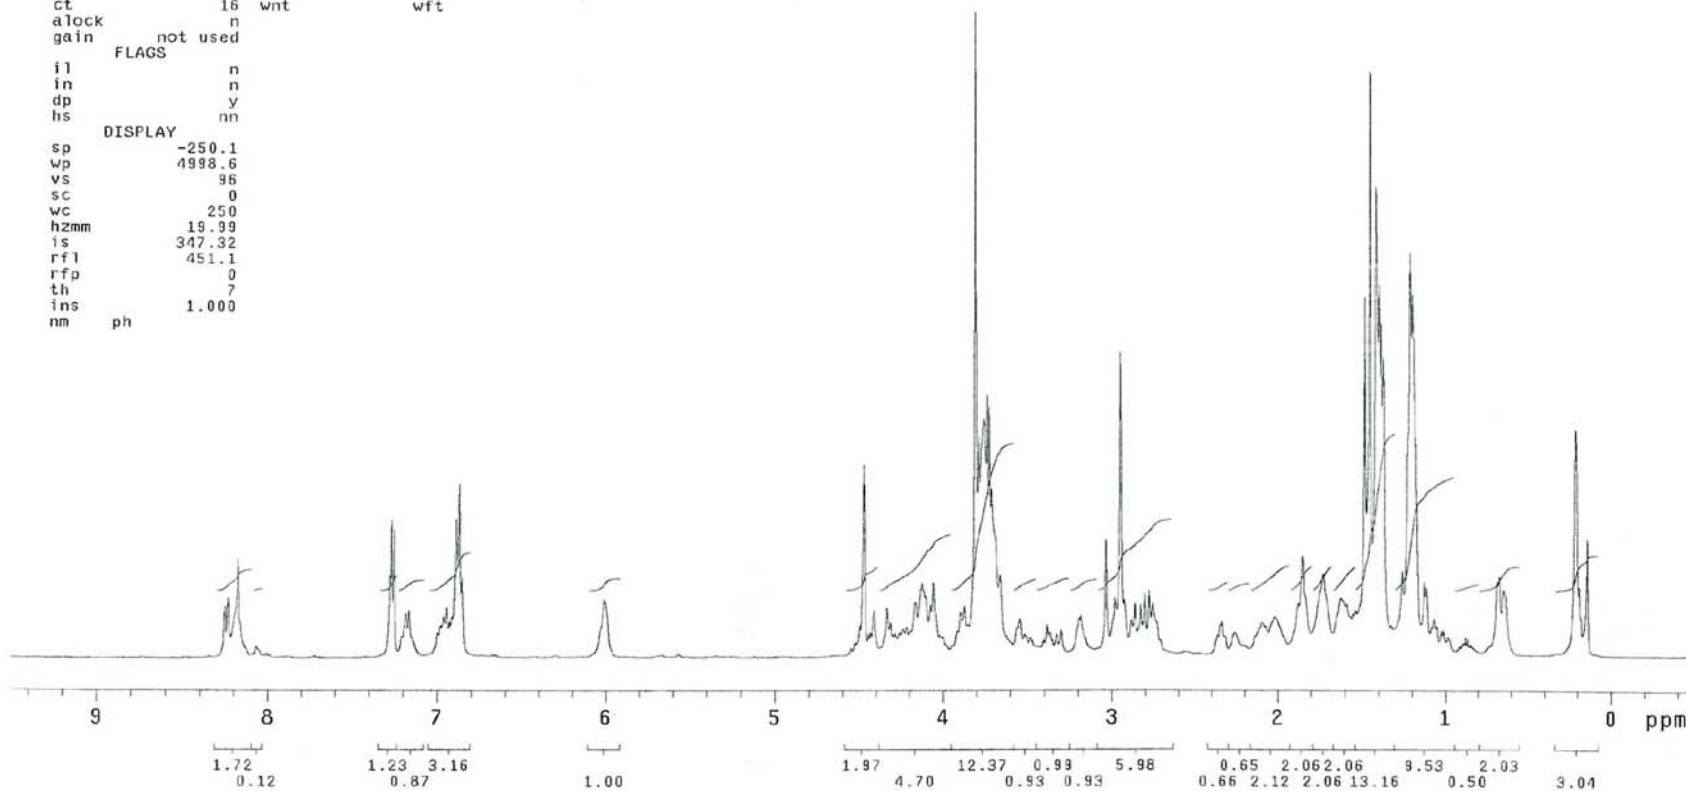

S168



WYKELN11018\_13C

exp1 s2pu1

| SAMPLE              |                | DEC. & VT |          |
|---------------------|----------------|-----------|----------|
| date                | Oct 27 2010    | dfrq      | 499.674  |
| solvent             | CDC13          | dn        | H1       |
| file                | /export/home/~ | dpwr      | 48       |
| ds2/vnmrsys/data/i~ |                | dof       | 0        |
| 500c/schreiber/wAN~ |                | dm        | yyy      |
| G/Pub1/WYKELN11018~ |                | dmm       | w        |
| 13C.fid             |                | dmf       | 9180     |
| ACQUISITION         |                |           |          |
| sfrq                | 125.707        | dseq      | 1.0      |
| tn                  | C13            | homo      | n        |
| at                  | 1.092          | temp      | 25.0     |
| PROCESSING          |                |           |          |
| np                  | 65536          | lb        | 1.00     |
| sw                  | 29936.3        | wtfile    |          |
| fb                  | not used       | proc      | ft       |
| bs                  | 16             | fn        | not used |
| tpwr                | 55             | math      | f        |
| pw                  | 4.8            |           |          |
| d1                  | 0              |           |          |
| tof                 | 2000.0         | werr      |          |
| nt                  | 99999          | wexp      |          |
| ct                  | 3104           | wbs       |          |
| alock               | n              | wnt       |          |
| gain                | not used       |           |          |
| FLAGS               |                |           |          |
| il                  | n              |           |          |
| in                  | n              |           |          |
| dp                  | y              |           |          |
| hs                  | nn             |           |          |
| DISPLAY             |                |           |          |
| sp                  | -1095.1        |           |          |
| wp                  | 29995.3        |           |          |
| vs                  | 104            |           |          |
| sc                  | 0              |           |          |
| wc                  | 250            |           |          |
| h2mm                | 119.98         |           |          |
| is                  | 500.00         |           |          |
| rfl                 | 10774.4        |           |          |
| rfp                 | 9678.3         |           |          |
| th                  | 2              |           |          |
| ins                 | 100.000        |           |          |
| nm                  | cdc            | ph        |          |

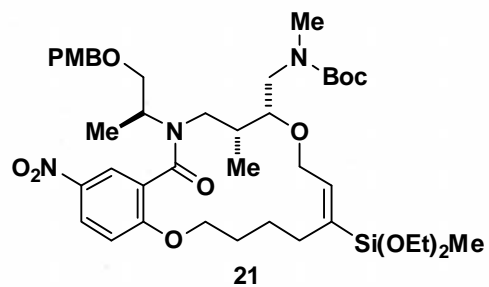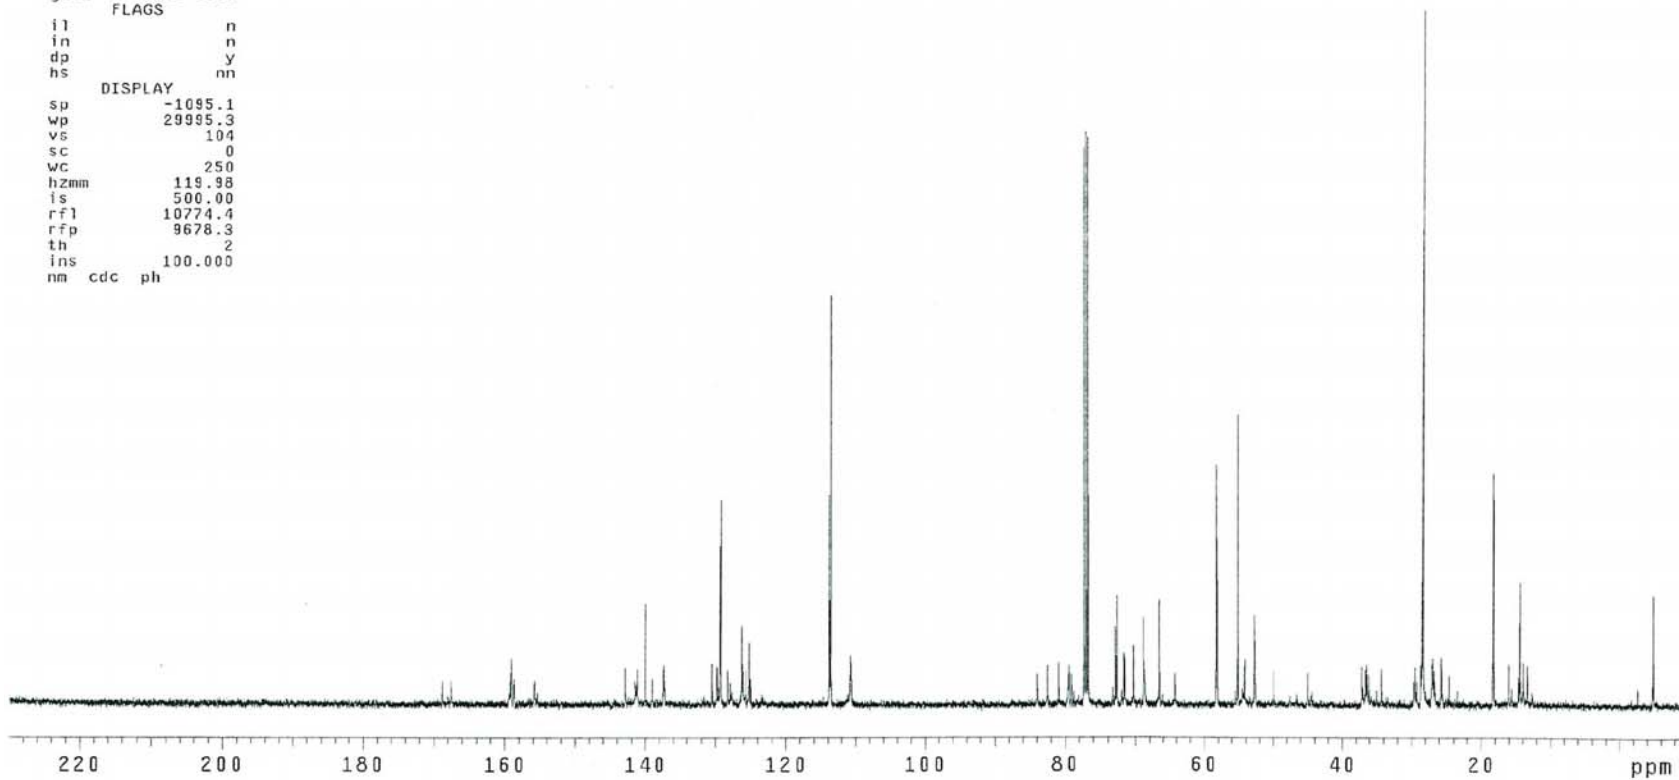

S169

WYKELN10048\_1H

exp1 s2pu1

```
SAMPLE          DEC. & VT
date Apr 23 2011 dfrq      499.874
solvent CDC13      dn       H1
file exp          dpwr     30
ACQUISITION     dof       0
sfrq 499.875     dm        mn
tn H1            dmm       c
at 2.184         dmf       200
np 32768         dseq
sw 7501.2        dres     1.0
fb not used      homo     n
bs 4             temp     25.0
ss 2             DEC2
tpwr 62          dfrq2    0
pw 12.0          dn2      1
dl 0            dpwr2    0
tof 800.0        dof2     0
nt 16           dm2     n
ct 16           dmm2    c
alock not used   dmf2    200
gain not used    dseq2
FLAGS           dres2    1.0
il n            homo2   n
in n            DEC3
dp y            dfrq3    0
hs nn          dn3
DISPLAY         dpwr3    1
sp -250.2       dof3     0
wp 4998.6       dm3     n
vs 151          dmm3    c
sc 0            dmf3    200
wc 250          dseq3
hzmm 19.99      dres3    1.0
is 388.58       homo3   n
rf1 460.8       PROCESSING
rff 0           lb       1.10
th 3            wtfile
ins 2.000       proc    ft
nm ph          fn     32768
               math    f
               werr
               wexp
               wbs
               wnt
               wft
```

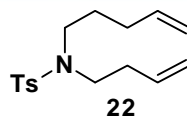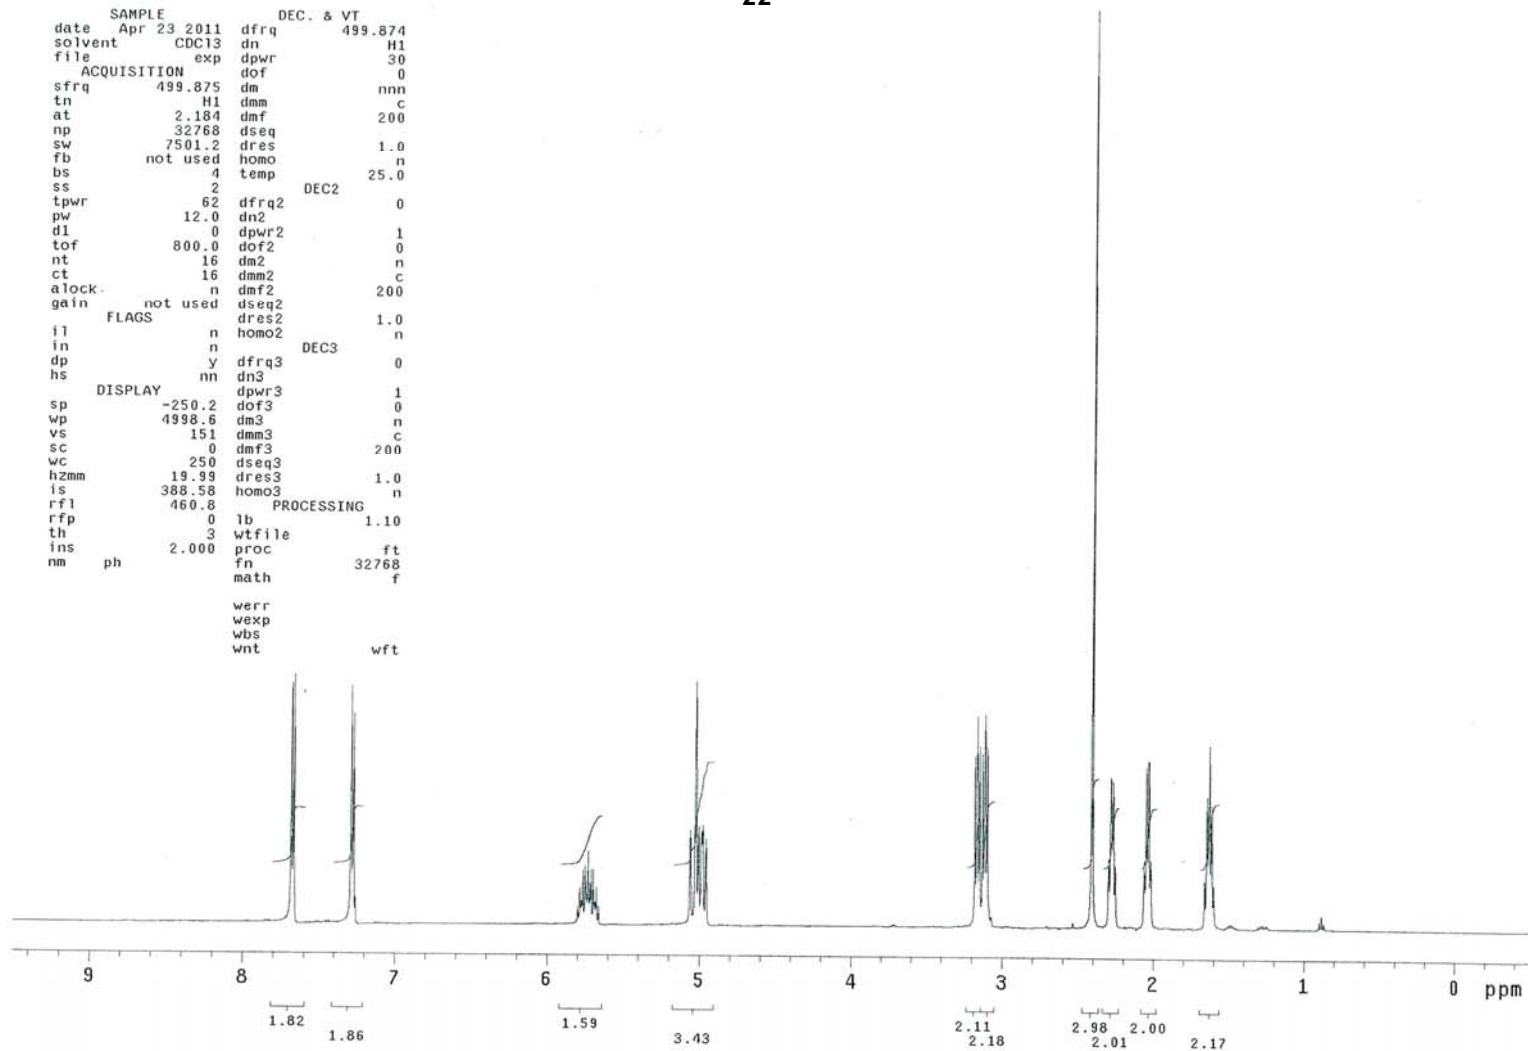

S170

WYKELN10048\_13C

exp2 s2pul

```
SAMPLE          DEC. & VT
date  Apr 23 2011  dfrq          499.874
solvent  CDC13    dn            H1
file     exp      dpwr          48
          ACQUISITION  dof            0
sfrq     125.707  dm            yyy
tn        C13     dmm            w
at        1.092   dmf            8929
np        85536   dseq           1.0
sw        29996.3 dres           n
fb        not used homo          25.0
bs         16    temp
tpwr       55    DEC2
pw         4.8   dfrq2          0
d1         0    dn2
tof        2000.0 dpwr2         1
nt         9999  dof2          0
ct         144   dm2          n
alock     n     dmm2          c
gain     not used dmf2        10000
          FLAGS
il        n     dres2         1.0
in        n     homo2        n
dp        y
hs        nn    dfrq3          0
          DISPLAY
sp       -1093.3 dpwr3         1
wp       29995.3 dof3          0
vs        84    dm3          n
sc         0    dmm3          c
wc         250  dmf3        10000
hzmm      119.98 dseq3         1.0
is        500.00 dres3         n
rfl       10772.6 homo3
rfp       9678.3 PROCESSING
th         8    lb            1.00
ins       100.000 wtfile
nm  cdc  ph    proc          ft
                   fn        not used
                   math       f
                   werr
                   wexp
                   wbs
                   wnt
```

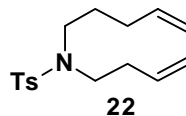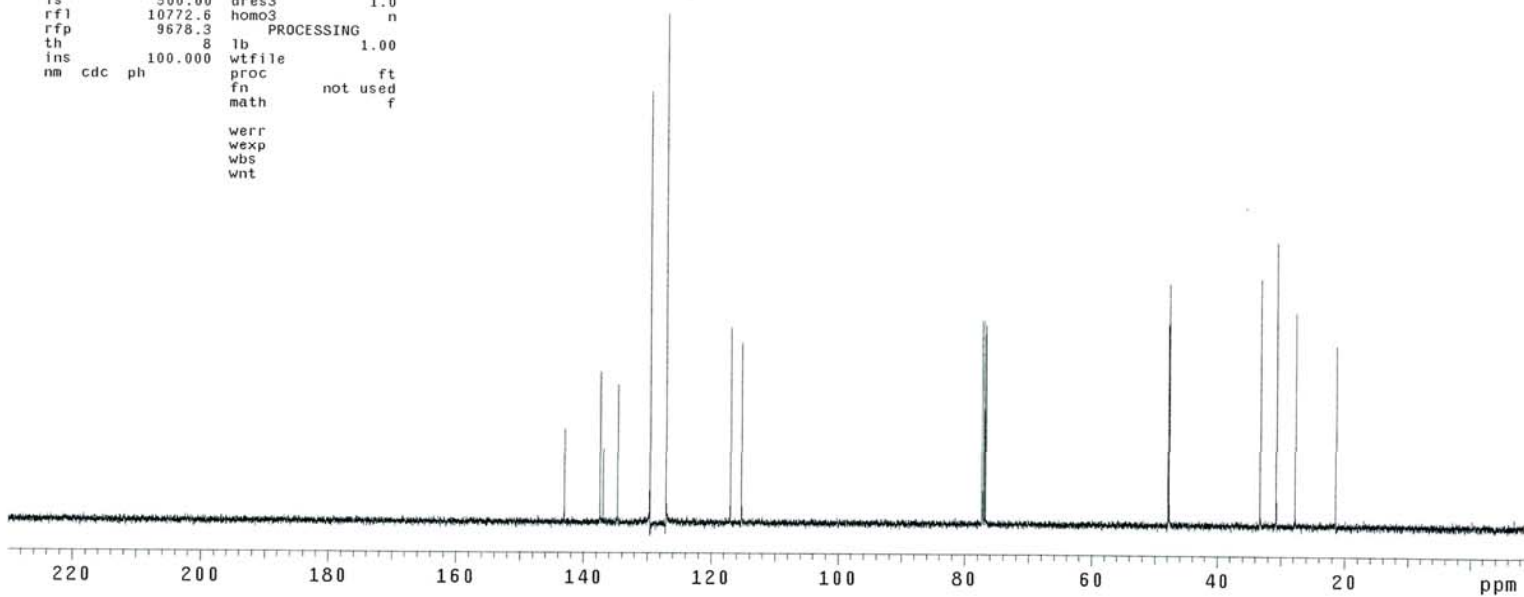

S171

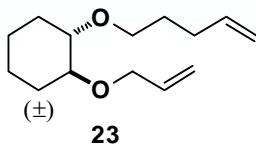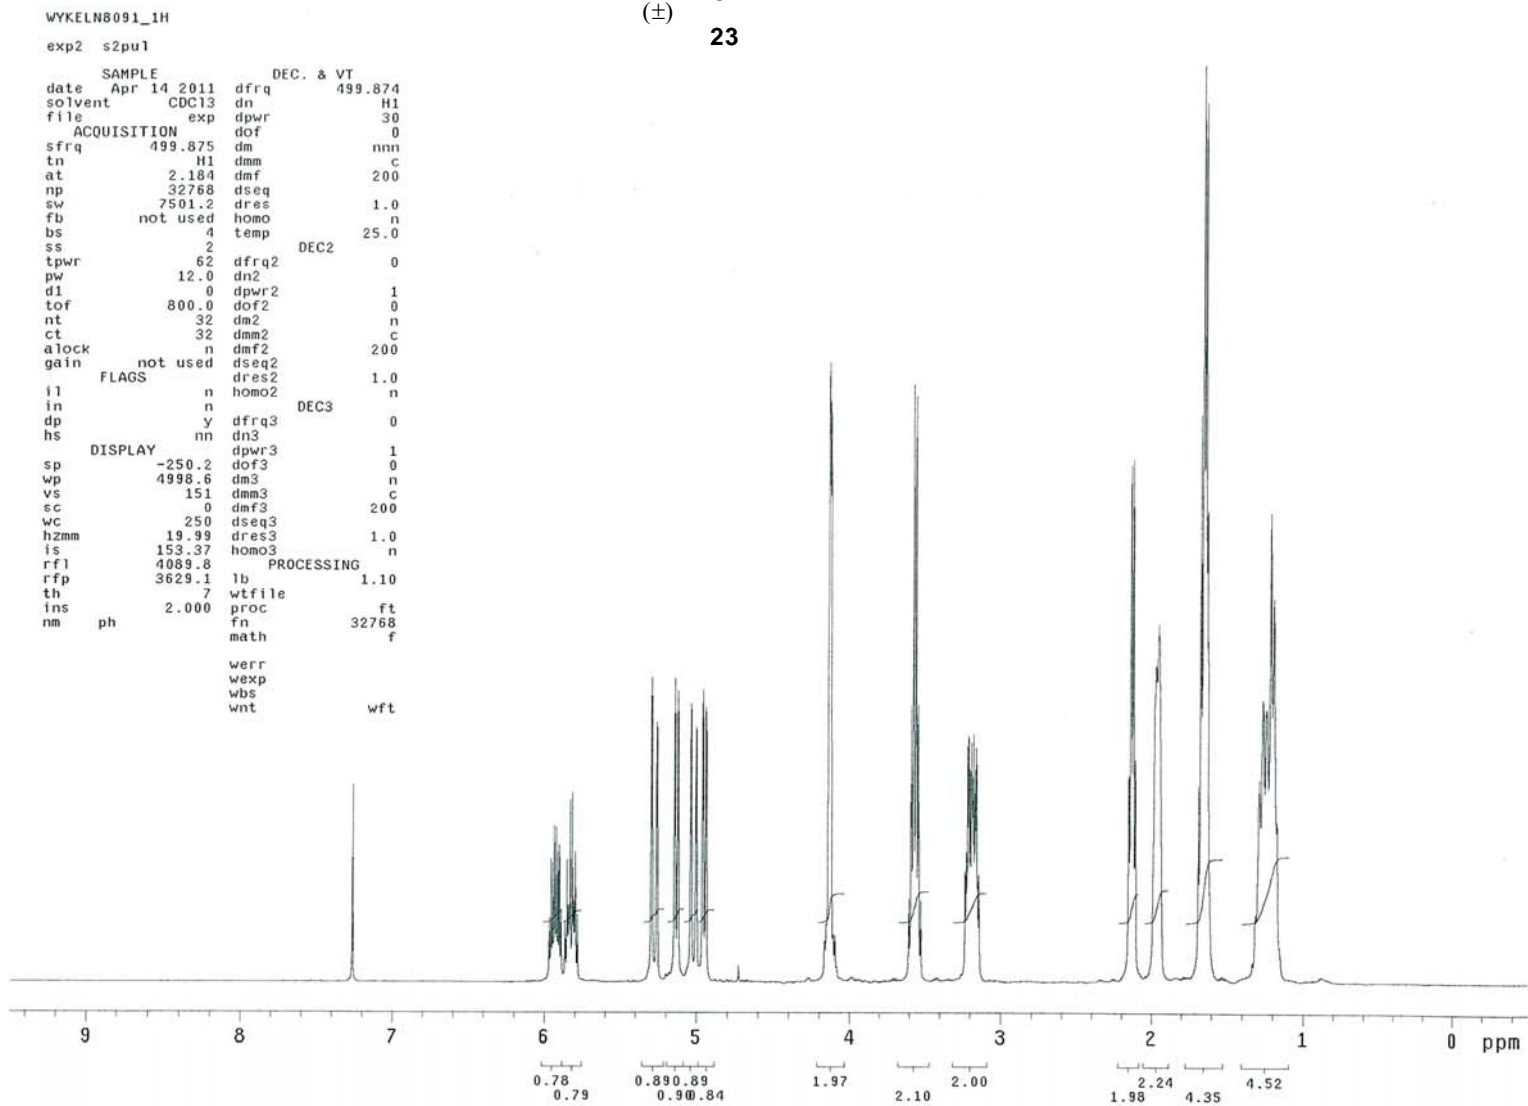

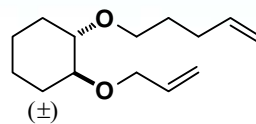

WYKELN8091\_13C

exp3 s2pu1

|             |             |            |          |
|-------------|-------------|------------|----------|
| SAMPLE      |             | DEC. & VT  |          |
| date        | Apr 14 2011 | dfrq       | 499.874  |
| solvent     | CDC13       | dn         | H1       |
| file        | exp         | dpwr       | 48       |
| ACQUISITION |             | dof        | 0        |
| sfrq        | 125.707     | dm         | yyy      |
| tn          | C13         | dmm        | w        |
| at          | 1.092       | dmf        | 8929     |
| np          | 65536       | dseq       |          |
| sw          | 29996.3     | dres       | 1.0      |
| fb          | not used    | homo       | n        |
| bs          | 16          | temp       | 25.0     |
| tpwr        | 55          | DEC2       |          |
| pw          | 4.8         | dfrq2      | 0        |
| d1          | 0           | dn2        |          |
| tof         | 2000.0      | dpwr2      | 1        |
| nt          | 9999        | dof2       | 0        |
| ct          | 208         | dm2        | n        |
| alock       | n           | dmm2       | c        |
| gain        | not used    | dmf2       | 10000    |
| FLAGS       |             | dseq2      |          |
| il          | n           | dres2      | 1.0      |
| in          | n           | homo2      | n        |
| dp          | y           | DEC3       |          |
| hs          | nn          | dfrq3      | 0        |
| DISPLAY     |             | dn3        |          |
| sp          | -1087.8     | dpwr3      | 1        |
| wp          | 29995.3     | dof3       | 0        |
| vs          | 54          | dm3        | n        |
| sc          | 0           | dmm3       | c        |
| wc          | 250         | dmf3       | 10000    |
| hzmm        | 119.98      | dseq3      |          |
| fs          | 500.00      | dres3      | 1.0      |
| rfl         | 10767.1     | homo3      | n        |
| rfp         | 9678.3      | PROCESSING |          |
| th          | 5           | lb         | 1.00     |
| ins         | 100.000     | wfile      |          |
| nm          | cdc ph      | proc       | ft       |
|             |             | fn         | not used |
|             |             | math       | f        |
|             |             | werr       |          |
|             |             | wexp       |          |
|             |             | wbs        |          |
|             |             | wnt        |          |

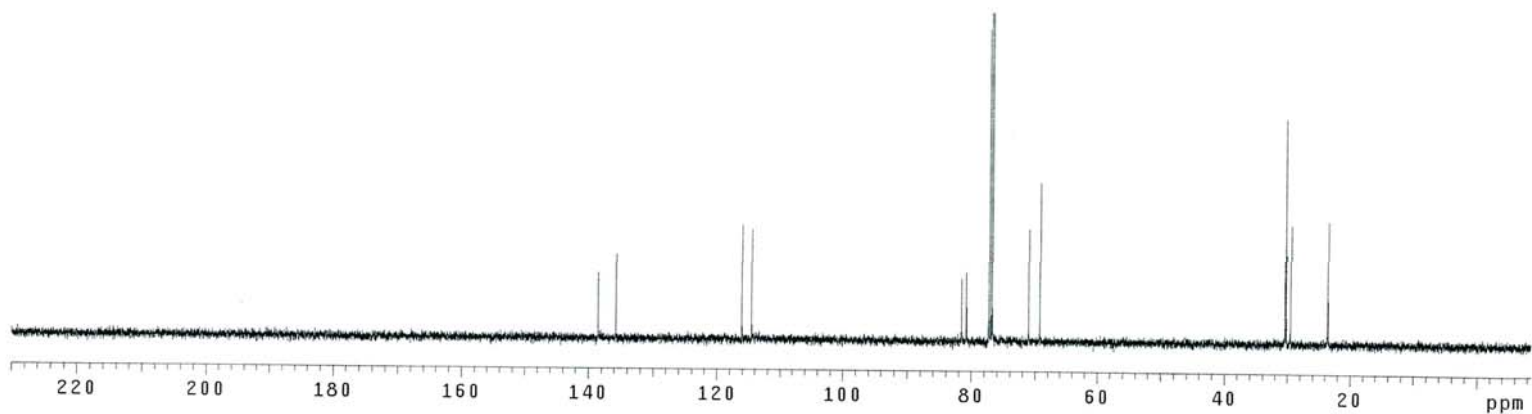

S173

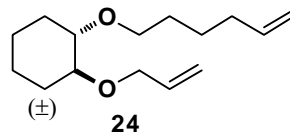

WYKELN8092\_1H  
exp2 s2pu1

|             |             |        |                 |
|-------------|-------------|--------|-----------------|
| date        | Apr 14 2011 | dfrq   | 499.874         |
| solvent     | CDC13       | dn     | H1              |
| file        |             | exp    | 30              |
| ACQUISITION |             | dof    | 0               |
| sfrq        | 499.875     | dm     | nnn             |
| tn          | H1          | dmm    | c               |
| at          | 2.184       | dmf    | 200             |
| np          | 32768       | dseq   |                 |
| sw          | 7501.2      | dres   | 1.0             |
| fb          | not used    | homo   | n               |
| bs          | 4           | temp   | 25.0            |
| ss          | 2           |        |                 |
| tpwr        | 62          | dfrq2  | DEC2 0          |
| pw          | 12.0        | dn2    |                 |
| d1          | 0           | dpwr2  | 1               |
| tof         | 800.0       | dof2   | 0               |
| nt          | 16          | dm2    | n               |
| ct          | 16          | dmm2   | c               |
| alock       | n           | dmf2   | 200             |
| gain        | not used    | dseq2  |                 |
| FLAGS       |             | dres2  | 1.0             |
| il          | n           | homo2  | n               |
| in          | n           |        | DEC3 0          |
| dp          | y           | dfrq3  |                 |
| hs          | nn          | dn3    |                 |
| DISPLAY     |             | dpwr3  | 1               |
| sp          | -250.2      | dof3   | 0               |
| wp          | 4998.6      | dm3    | n               |
| vs          | 58          | dmm3   | c               |
| sc          | 0           | dmf3   | 200             |
| wc          | 250         | dseq3  |                 |
| hzmm        | 19.99       | dres3  | 1.0             |
| is          | 153.37      | homo3  | n               |
| rfl         | 4090.3      |        |                 |
| rfp         | 3629.1      | lb     | PROCESSING 1.10 |
| th          | 5           | wtfile |                 |
| ins         | 2.000       | proc   | ft              |
| nm          | ph          | fn     | 32768           |
|             |             | math   | f               |
|             |             | werr   |                 |
|             |             | wexp   |                 |
|             |             | wbs    |                 |
|             |             | wnt    | wft             |

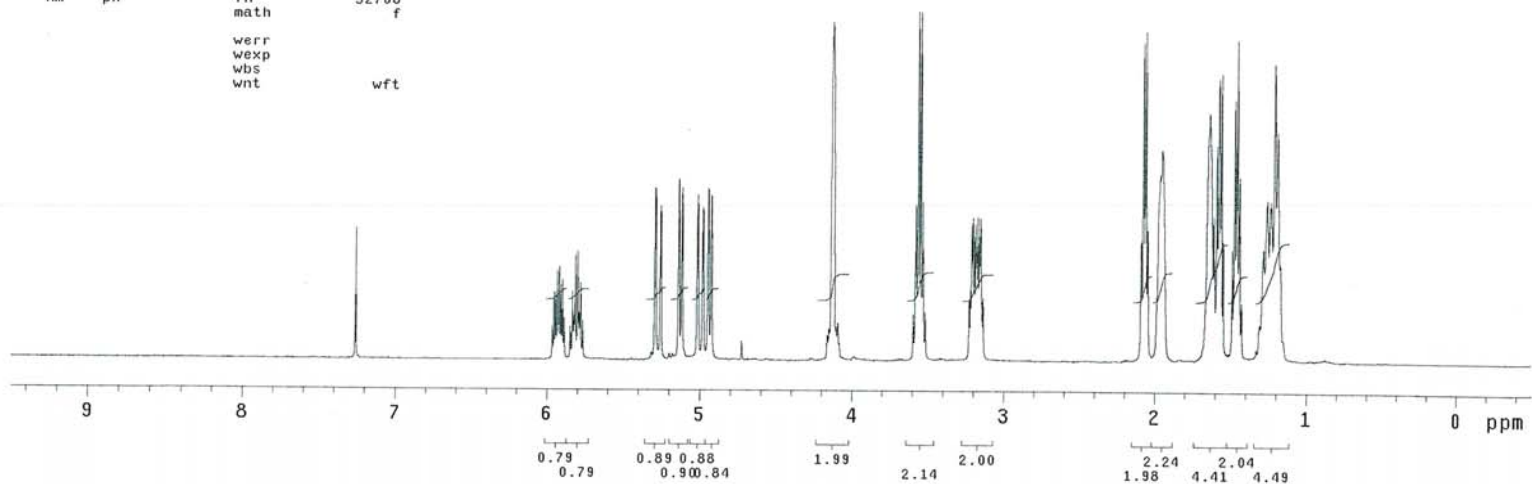

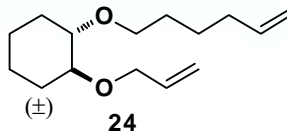

WYKLN8092\_13C

exp3 s2pu1

|             |             |           |            |
|-------------|-------------|-----------|------------|
| SAMPLE      |             | DEC. & VT |            |
| date        | Apr 14 2011 | dfrq      | 499.874    |
| solvent     | CDC13       | dn        | H1         |
| file        | exp         | dpwr      | 48         |
| ACQUISITION |             | dof       | 0          |
| sfrq        | 125.707     | dm        | YYY        |
| tn          | C13         | dmm       | w          |
| at          | 1.092       | dmf       | 8929       |
| np          | 65536       | dseq      |            |
| sw          | 29996.3     | dres      | 1.0        |
| fb          | not used    | homo      | n          |
| bs          | 16          | temp      | 25.0       |
| tpwr        | 55          |           | DEC2       |
| pw          | 4.8         | dfrq2     | 0          |
| d1          | 0           | dn2       |            |
| tof         | 2000.0      | dpwr2     | 1          |
| nt          | 9999        | dof2      | 0          |
| ct          | 320         | dm2       | n          |
| alock       | n           | dmm2      | n          |
| gain        | not used    | dmf2      | 10000      |
| FLAGS       |             | dseq2     |            |
| il          | n           | dres2     | 1.0        |
| in          | n           | homo2     | n          |
| dp          | y           |           | DEC3       |
| hs          | nn          | dfrq3     | 0          |
| DISPLAY     |             | dn3       |            |
| sp          | -1087.8     | dpwr3     | 1          |
| wp          | 29995.3     | dof3      | 0          |
| vs          | 54          | dm3       | n          |
| sc          | 0           | dmm3      | c          |
| wc          | 250         | dmf3      | 10000      |
| hzmm        | 119.98      | dseq3     |            |
| is          | 500.00      | dres3     | 1.0        |
| rfl         | 10767.1     | homo3     | n          |
| rfp         | 9678.3      |           | PROCESSING |
| th          | 5           | lb        | 1.00       |
| ins         | 100.000     | wfile     |            |
| nm          | cdc ph      | proc      | ft         |
|             |             | fn        | not used   |
|             |             | math      | f          |
|             |             | werr      |            |
|             |             | wexp      |            |
|             |             | wbs       |            |
|             |             | wnt       |            |

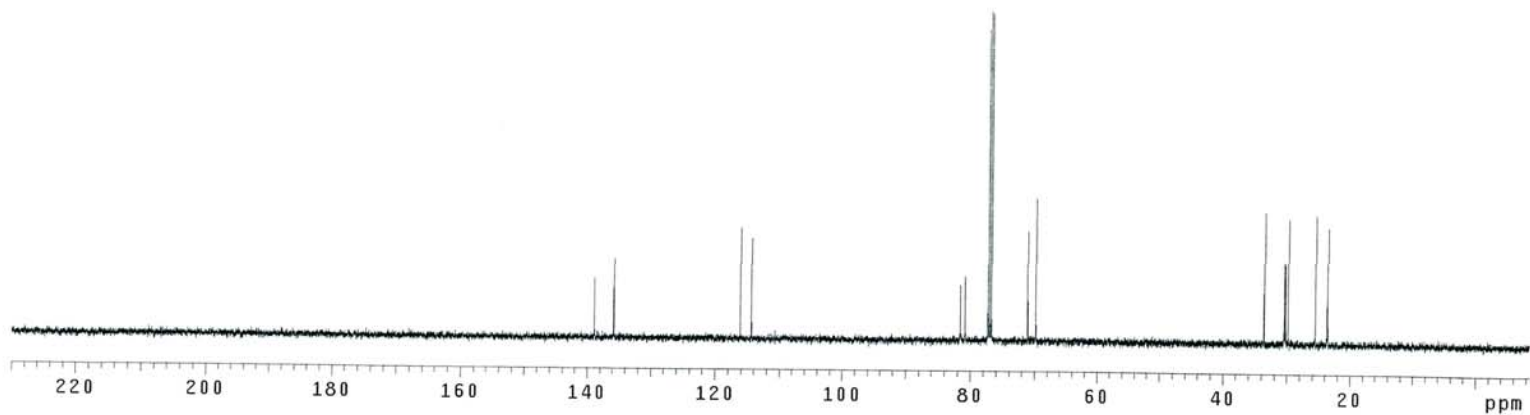

S175

WYKELN10042\_1H

exp1 s2pu1

```
SAMPLE          DEC. & VT
date Apr 22 2011 dfrq      499.874
solvent CDC13      dn      H1
file          exp      dpwr     30
ACQUISITION    exp      dof      0
sfrq      499.875    dm       nnn
tn         H1       dmm       c
at         2.184    dmf      200
np         32768    dseq
sw         7501.2   dres     1.0
fb         not used homo      n
bs         4       temp     25.0
ss         2
tpwr      62      dfrq2    DEC2   0
pw        12.0    dn2
d1         0      dpwr2    1
tof        800.0  dof2     0
nt         16     dm2      n
ct         16     dmm2     c
alock      n      dmf2     200
gain       not used dseq2
          FLAGS    dres2    1.0
          n        homo2    n
          n
          y        dfrq3    DEC3   0
          nn       dn3
DISPLAY    dpwr3    1
sp         -250.2  dof3     0
wp         4998.6  dm3      n
vs         151    dmm3     c
sc         0      dmf3     200
wc         250    dseq3
hzmm      19.99   dres3    1.0
is        181.96 homo3    n
rfl       460.8
rfp       0      lb       PROCESSING 1.10
th        5      wtfile
ins       1.000  proc     ft
nm        ph     fn      32768
          math    f
          werr
          wexp
          wbs
          wnt      wft
```

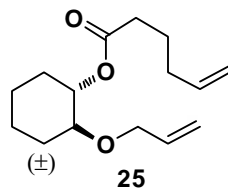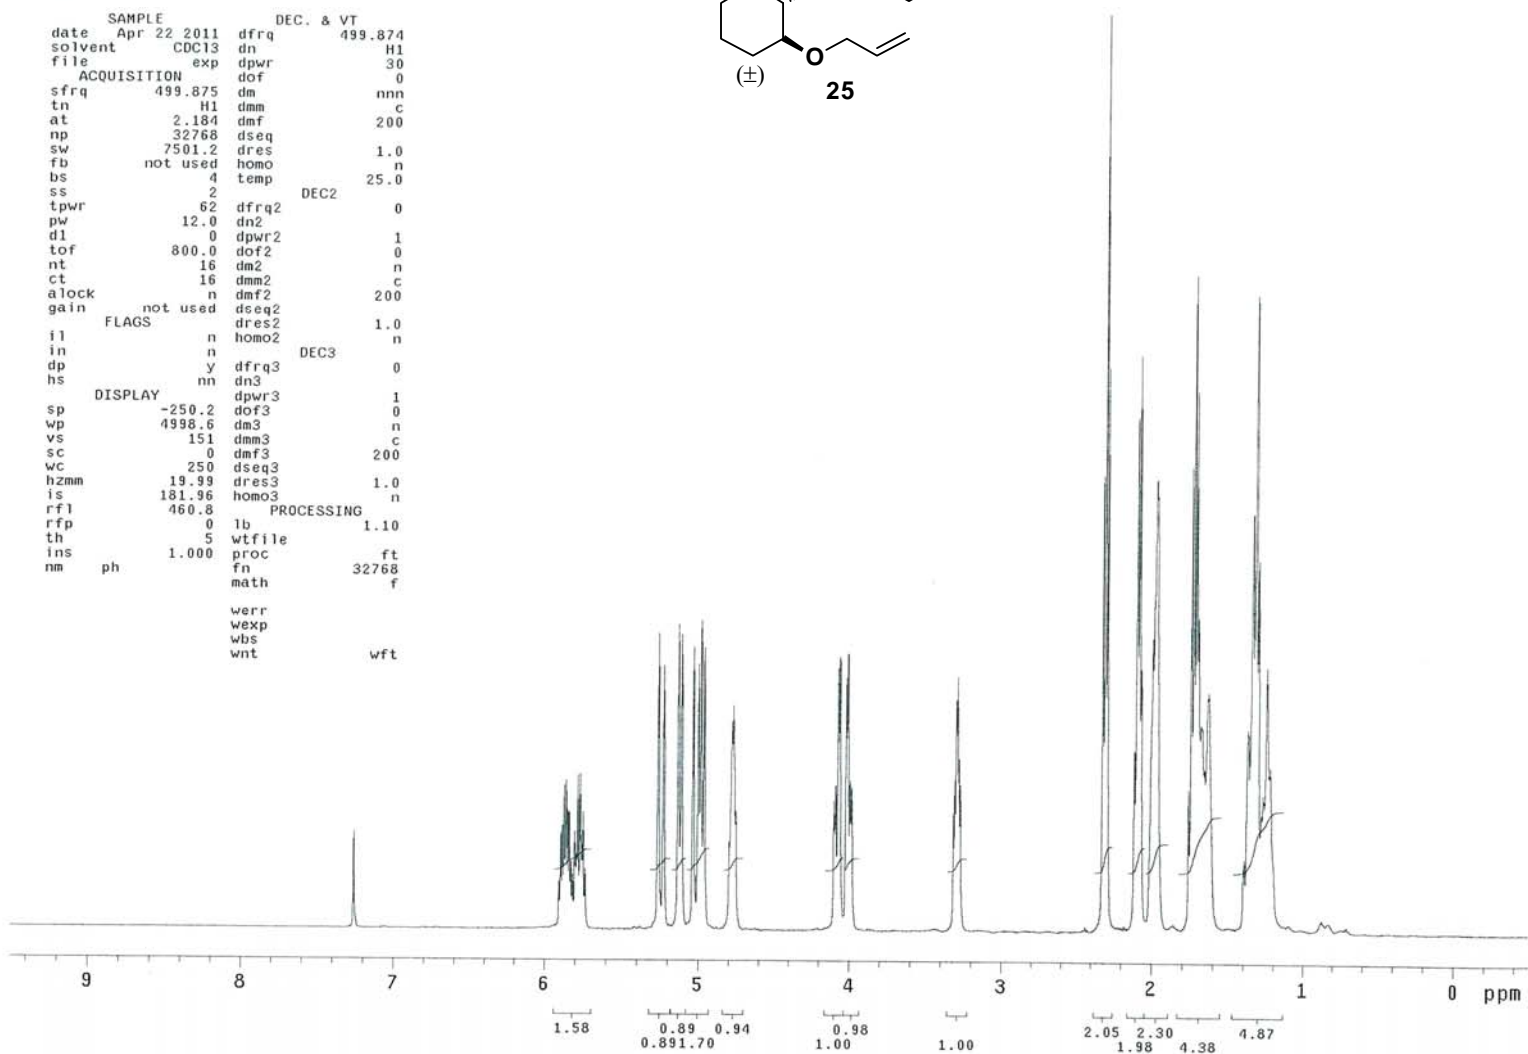

S176



WYKELN10042\_13C

exp2 s2pu1

```
SAMPLE          DEC. & VT
date Apr 22 2011 dfrq      499.874
solvent CDC13    dn        H1
file      exp    dpwr      48
ACQUISITION    dof        0
sfrq      125.707 dm        YYY
tn         C13  dmm        w
at         1.092 dmf       8929
np         65536 dseq
sw         29996.3 dres     1.0
fb         not used homo    n
bs         16    temp     25.0
tpwr       55          DEC2
pw         4.8  dfrq2     0
d1         0    dn2
tof        2000.0 dpwr2    1
nt         9999  dof2     0
ct         192  dm2       n
alock      n     dmm2     c
gain       not used dmf2   10000
          FLAGS      dseq2
il         n     dres2    1.0
in         n     homo2   n
dp         y          DEC3
hs         nn  dfrq3     0
          DISPLAY   dn3
sp        -1089.7 dpwr3    1
wp        29995.3 dof3     0
vs         47    dm3       n
sc         0    dmm3     c
wc         250  dmf3     10000
hzmm      119.98 dseq3
is         500.00 dres3    1.0
rfl       10768.9 homo3    n
rfp       9678.3          PROCESSING
th         3     lb        1.00
ins       100.000 wtfile
nm cdc ph  proc         ft
          fn         not used
          math        f
          werr
          wexp
          wbs
          wnt
```

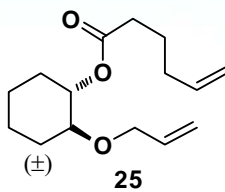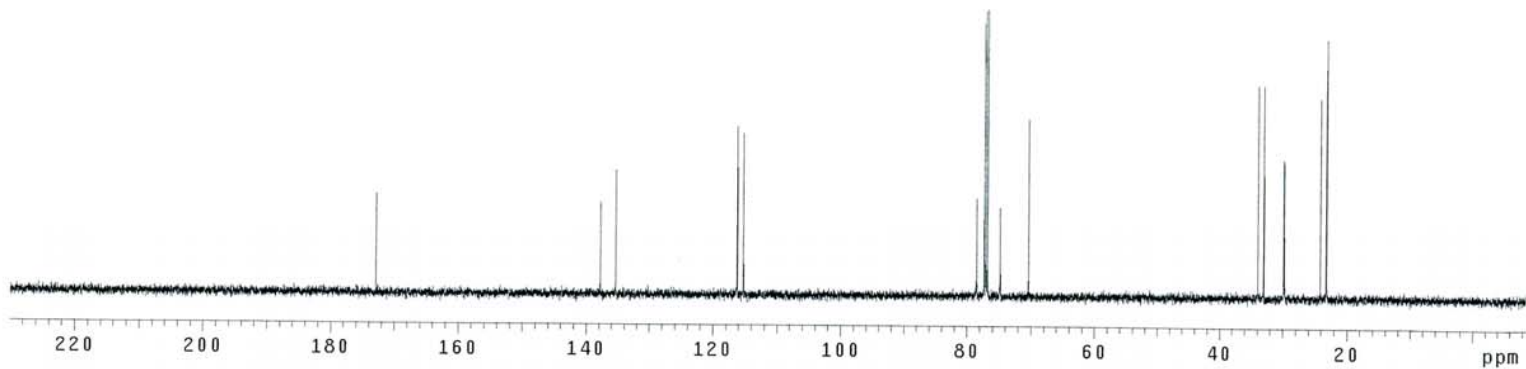

S177

WYKELN10040\_1H

expl s2pu1

```
SAMPLE          DEC. & VT
date Apr 22 2011 dfrq      499.874
solvent CDC13      dn       H1
file      exp      dpwr     30
ACQUISITION      dof       0
sfrq      499.875 dm        nnn
tn         H1      dmm       c
at         2.184 dmf       200
np         32768 dseq
sw         7501.2 dres     1.0
fb         not used homo    n
bs         4       temp     25.0
ss         2
tpwr       62      dfrq2    DEC2  0
pw         12.0   dn2
d1         0      dpwr2    1
tof        800.0  dof2     0
nt         16     dm2      n
ct         16     dmm2     c
alock      n     dmf2     200
gain       not used dseq2
          FLAGS    dres2    1.0
          n        homo2    n
          n
          DEC3  0
          y      dfrq3
          nn     dn3
          DISPLAY  dpwr3    1
          -250.2  dof3     0
          4998.6  dm3      n
          151     dmm3     c
          0       dmf3     200
          250     dseq3
          19.99   dres3    1.0
          103.74 homo3    n
          PROCESSING
          3629.1  lb       1.10
          4       wtfile
          ins     1.000   proc   ft
          nm     ph      fn     32768
          math     f
          werr
          wexp
          wbs
          wnt       wft
```

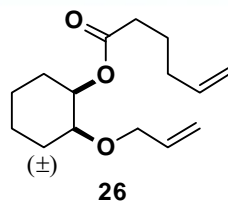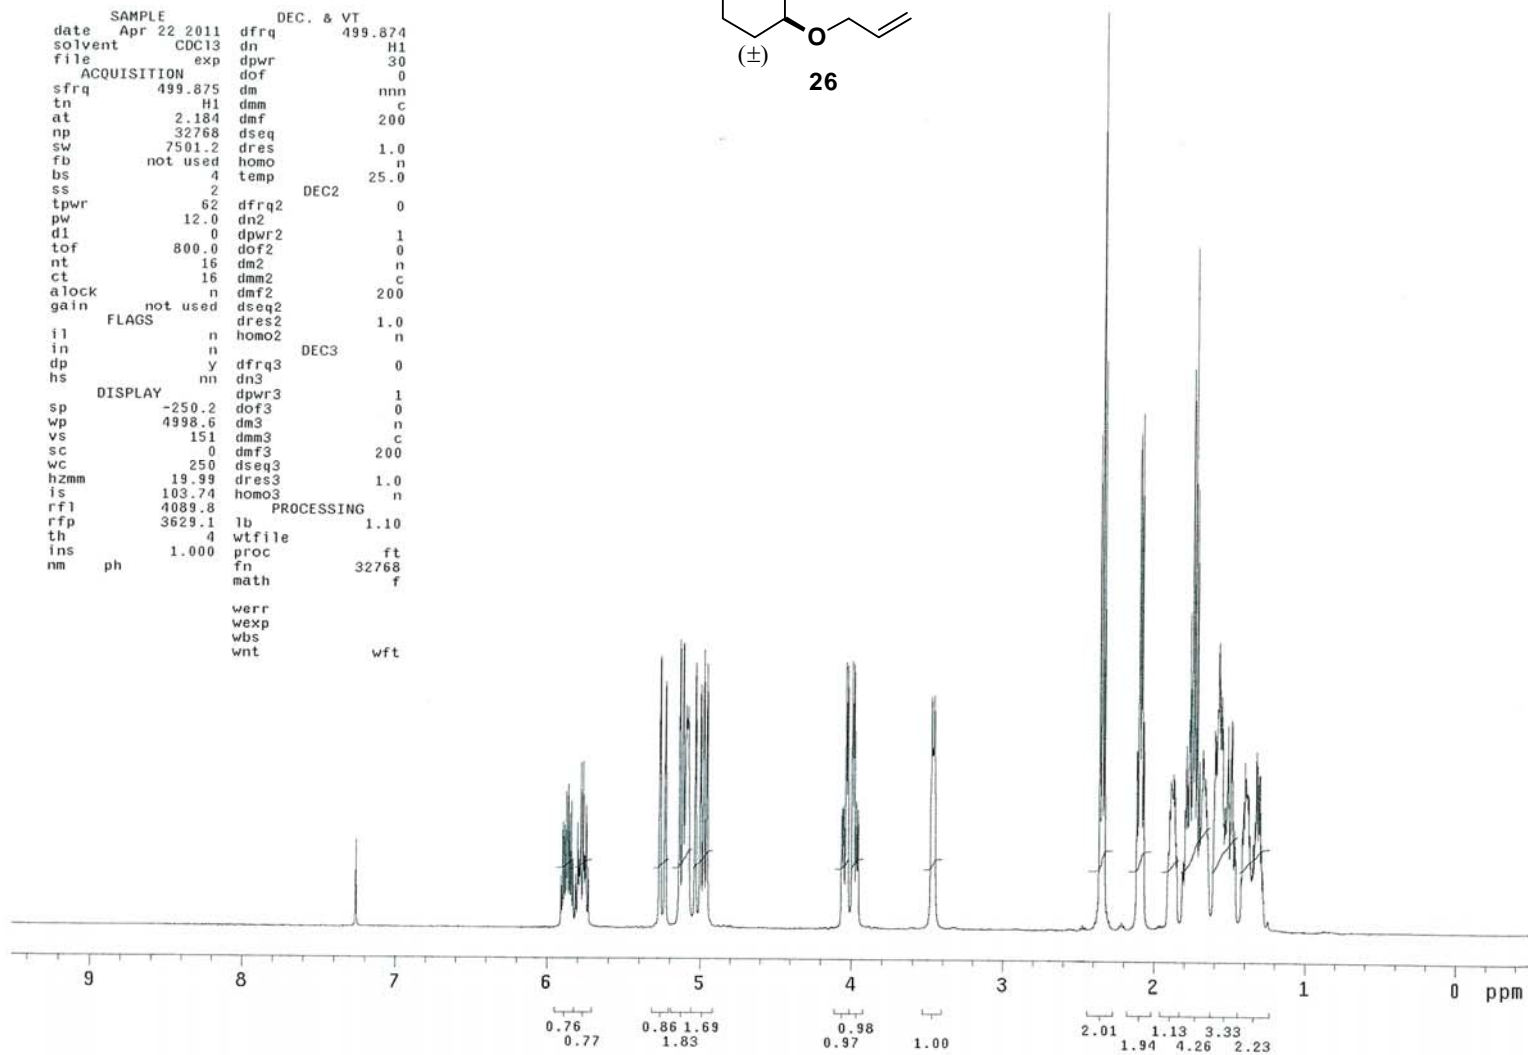

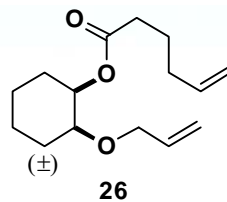

```

WYKELN10040_13C
exp2 s2pu1
SAMPLE
date Apr 22 2011 dfrq 499.874
solvent CDC13 dn H1
file exp dpwr 48
ACQUISITION dof 0
sfrq 125.707 dm yyy
tn C13 dmm w
at 1.092 dmf 8929
np 65536 dseq
sw 29996.3 dres 1.0
fb not used homo n
bs 16 temp 25.0
tpwr 55 DEC2
pw 4.8 dfrq2 0
d1 0 dn2
tof 2000.0 dpwr2 1
nt 99999 dof2 0
ct 288 dm2 n
alock n dmm2 c
gain not used dmF2 10000
FLAGS dseq2
il n dres2 1.0
in n homo2 n
dp y DEC3
hs nn dfrq3 0
DISPLAY dn3
sp -1090.6 dpwr3 1
wp 29995.3 dof3 0
vs 27 dm3 n
sc 0 dmm3 c
wc 250 dmF3 10000
hzmm 119.98 dseq3
is 500.00 dres3 1.0
rfl 10769.8 homo3 n
rfp 9678.3 PROCESSING
th 2 lb 1.00
ins 100.000 wfile
nm cdc ph proc ft
fn not used f
math
werr
wexp
wbs
wnt

```

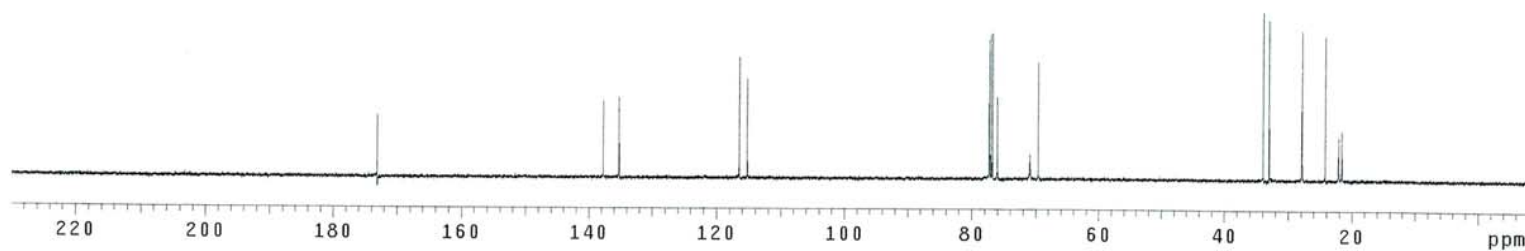

S179

S/N = 351

exp3 s2pu1

SAMPLE DEC. & VT  
date Apr 22 2011 dfrq 499.874  
solvent CDC13 dn H1  
file /export/home/~ dpwr 30  
ds2/vnmrsys/data/i~ dof 0  
500c/schreiber/mji~ dm nnn  
menez/MJ2034-35.fi~ dmm c  
d dmf 200

ACQUISITION dseq  
sfrq 499.875 dres 1.0  
in H1 homo n  
at 2.184 temp 25.0

PROCESSING  
np 32768 lb 1.10  
sw 7501.2 wtfile  
fb not used 8 proc ft  
bs 2 fn 32768  
ss 62 math f  
pw 12.0  
d1 0 werr  
tof 800.0 wexp  
nt 16 wbs  
ct 16 wnt wft

alock n  
gain not used  
FLAGS  
il n  
in n  
dp y  
hs nn

DISPLAY  
sp -250.2  
wp 4998.6  
vs 110  
sc 0  
wc 250  
h2mm 19.99  
is 494.25  
rfl 4088.0  
rfp 3629.1  
th 7  
ins 1.000  
nm ph

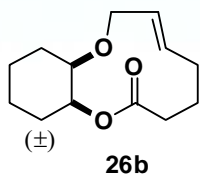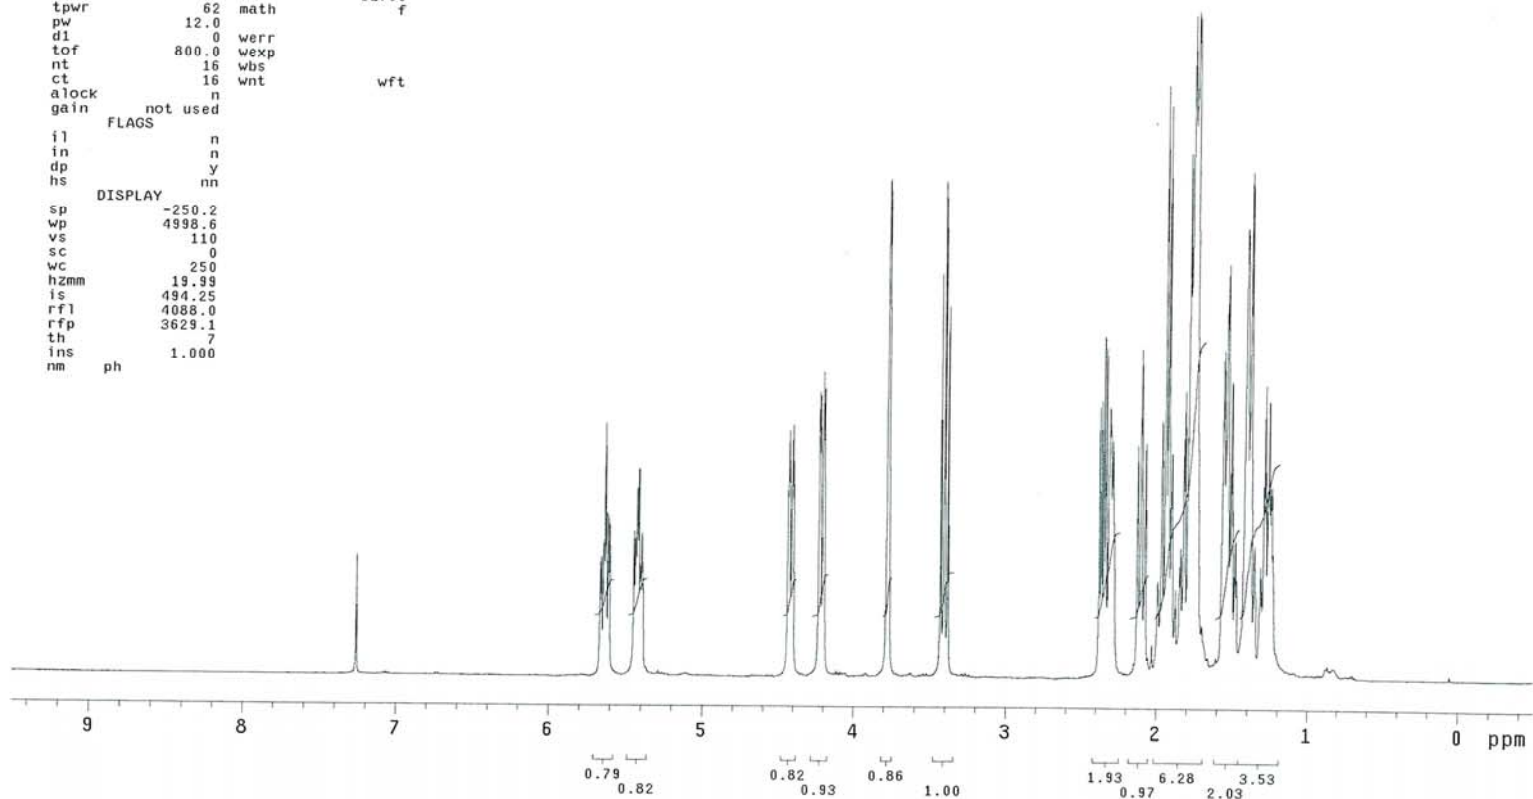

S180

## STANDARD CARBON PARAMETERS

```
exp3 s2pu1
SAMPLE DEC. & VT
date Apr 22 2011 dfrq 499.874
solvent CDC13 dn H1
file /export/home/~ dpwr 48
ds2/vnmrsys/data/i~ dof 0
500c/schreiber/mji~ dm YYY
menez/MJ2034-35_C1~ dmm w
3.f1d dmf 8929
ACQUISITION
sfrq 125.707 dseq
tn C13 dres 1.0
at 1.092 temp 25.0
np 65536 PROCESSING
sw 29996.3 lb 1.00
fb not used wtfile
bs 32 proc ft
tpwr 55 fn not used
pw 4.8 math f
d1 0
tof 2000.0 werr
nt 1024 wexp
ct 742 wbs
alock n wnt
gain not used
FLAGS
il n
in n
dp y
hs nn
DISPLAY
sp -1088.7
wp 29995.3
vs 71
sc 0
wc 250
hzmm 119.98
is 500.00
rf1 10768.0
rfp 9678.3
th 16
ins 100.000
nm cdc ph
```

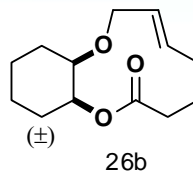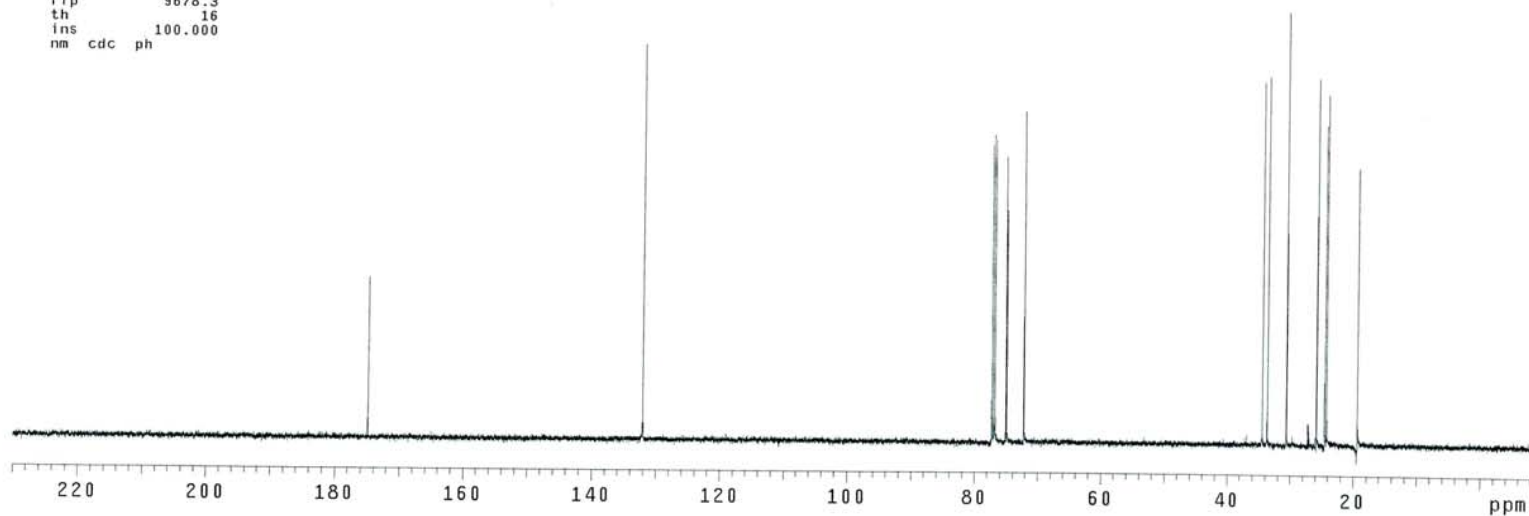

S181

WYKELN8093\_1H

exp2 s2pu1

```
SAMPLE          DEC. & VT
date    Apr 14 2011  dfrq      499.874
solvent  CDC13      dn        H1
file     exp        dpwr      30
ACQUISITION  dof      0
sfrq    499.875    dm        nnn
tn       H1       dmm        c
at       2.184    dmf       200
np       32768    dseq      1.0
sw       7501.2   dres      n
fb       not used homo
bs       4       temp     25.0
ss       2
lpwr     62      dfrq2    DEC2    0
pw       12.0    dn2      1
d1       0      dpwr2    1
tof     800.0    dof2     0
nt       16     dm2      n
ct       16     dmm2     c
alock   not used dmf2     200
gain    not used dseq2    1.0
        FLAGS   n      homo2    n
il       n
in       n      dfrq3    DEC3    0
dp       y      dn3      1
hs       nn     dpwr3    1
        DISPLAY  dof3     0
sp       -250.2  dm3      n
wp       4998.6  dmm3     c
vs       79     dmf3     200
sc       0      dseq3    1.0
wc       250    dres3    n
hzmm    19.99  homo3    n
is       424.20
rfl     4089.8
rfp     3629.1  lb       1.10
        PROCESSING
th       3      wtfile
ins     2.000  proc    ft
nm      ph     fn     32768
        math
        werr
        wexp
        wbs
        wnt      wft
```

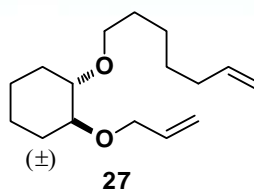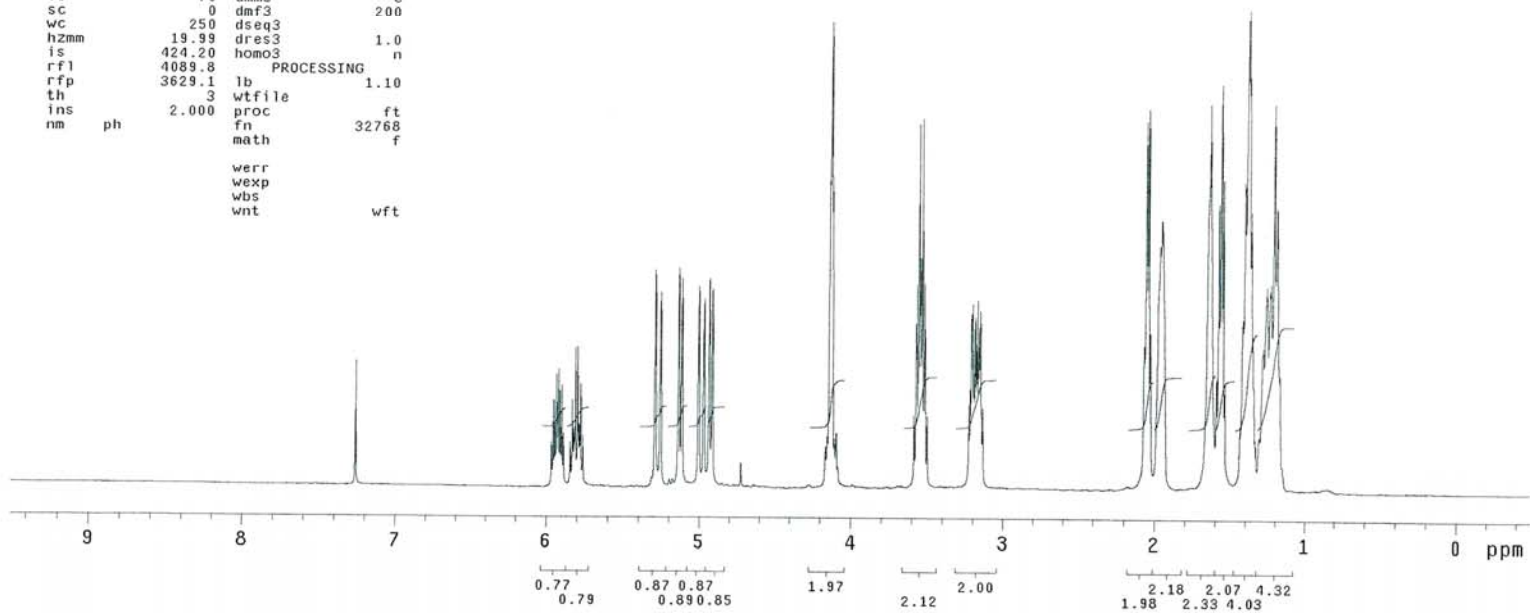

S182

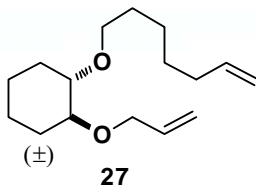

WYKELN8093\_13C

exp3 s2pu1

|             |             |           |            |
|-------------|-------------|-----------|------------|
| SAMPLE      |             | DEC. & VT |            |
| date        | Apr 14 2011 | dfrq      | 499.874    |
| solvent     | CDC13       | dn        | H1         |
| file        | exp         | dpwr      | 48         |
| ACQUISITION |             | dof       | 0          |
| sfrq        | 125.707     | dm        | YYY        |
| tn          | C13         | dmm       | w          |
| at          | 1.092       | dmf       | 8929       |
| np          | 65536       | dseq      |            |
| sw          | 29996.3     | dres      | 1.0        |
| fb          | not used    | homo      | n          |
| bs          | 16          | temp      | 25.0       |
| tpwr        | 55          |           | DEC2       |
| pw          | 4.8         | dfrq2     | 0          |
| d1          | 0           | dn2       |            |
| tof         | 2000.0      | dpwr2     | 1          |
| nt          | 9999        | dof2      | 0          |
| ct          | 176         | dm2       | n          |
| alock       | n           | dmm2      | c          |
| gain        | not used    | dmf2      | 10000      |
| FLAGS       |             | dseq2     |            |
| il          | n           | dres2     | 1.0        |
| ln          | n           | homo2     | n          |
| dp          | y           |           | DEC3       |
| hs          | nn          | dfrq3     | 0          |
| DISPLAY     |             | dn3       |            |
| sp          | -1087.8     | dpwr3     | 1          |
| wp          | 29995.3     | dof3      | 0          |
| vs          | 30          | dm3       | n          |
| sc          | 0           | dmm3      | c          |
| vc          | 250         | dmf3      | 10000      |
| hzmm        | 119.38      | dseq3     |            |
| ls          | 500.00      | dres3     | 1.0        |
| rfl         | 10767.1     | homo3     | n          |
| rfp         | 9678.3      |           | PROCESSING |
| th          | 5           | lb        | 1.00       |
| ins         | 100.000     | wtfile    |            |
| nm          | cdc ph      | proc      | ft         |
|             |             | fn        | not used   |
|             |             | math      | f          |
|             |             | werr      |            |
|             |             | wexp      |            |
|             |             | wbs       |            |
|             |             | wnt       |            |

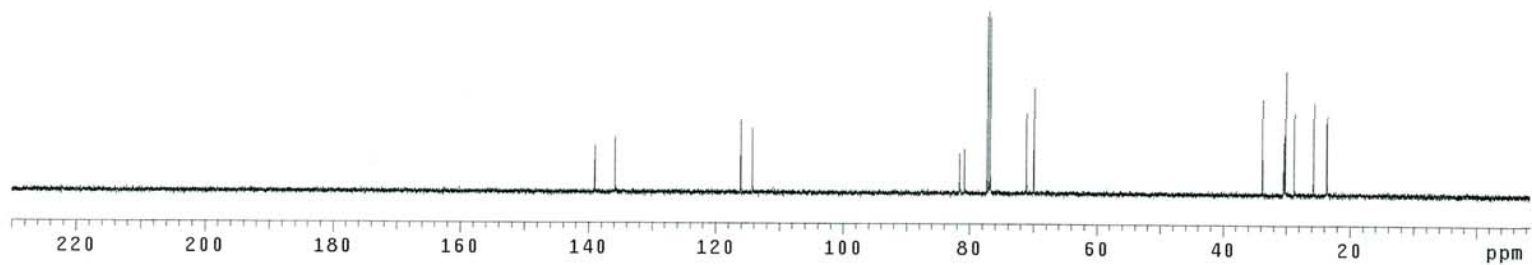

S183

WYKELN10043\_1H

exp1 s2pu1

```
SAMPLE          DEC. & VT
date Apr 22 2011 dfrq      499.874
solvent CDC13      dn       H1
file exp          dpwr     30
ACQUISITION     dof      0
sfrq 499.875     dm       mmn
tn     H1        dmm      c
at     2.184     dmf      200
np     32768     dseq     1.0
sw     7501.2    dres     n
fb     not used  homo    25.0
bs     4         temp
ss     2         DEC2
tpwr   62       dfrq2    0
pw     12.0     dn2      1
d1     0        dpwr2    1
tof    800.0    dof2     0
nt     16       dm2      n
ct     16       dmm2     c
alock  n        dmf2    200
gain   not used dseq2    1.0
        FLAGS   dres2    n
il     n        homo2
in     n        DEC3
dp     y        dfrq3    0
hs     nn       dn3
        DISPLAY dpwr3    1
sp     -250.2   dof3     0
wp     4998.6   dm3      n
vs     151     dmm3     c
sc     0        dmf3    200
wc     250     dseq3    1.0
hzmm   19.99   dres3    n
is     181.96  homo3
rfl    4089.4  PROCESSING 1.10
rfp    3629.1  lb
th     5       wtfile
ins    1.000   proc     ft
nm     ph      fn       32768
        math     f
        werr
        wexp
        wbs
        wnt      wft
```

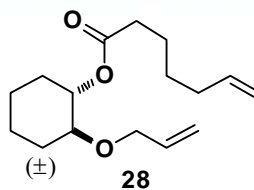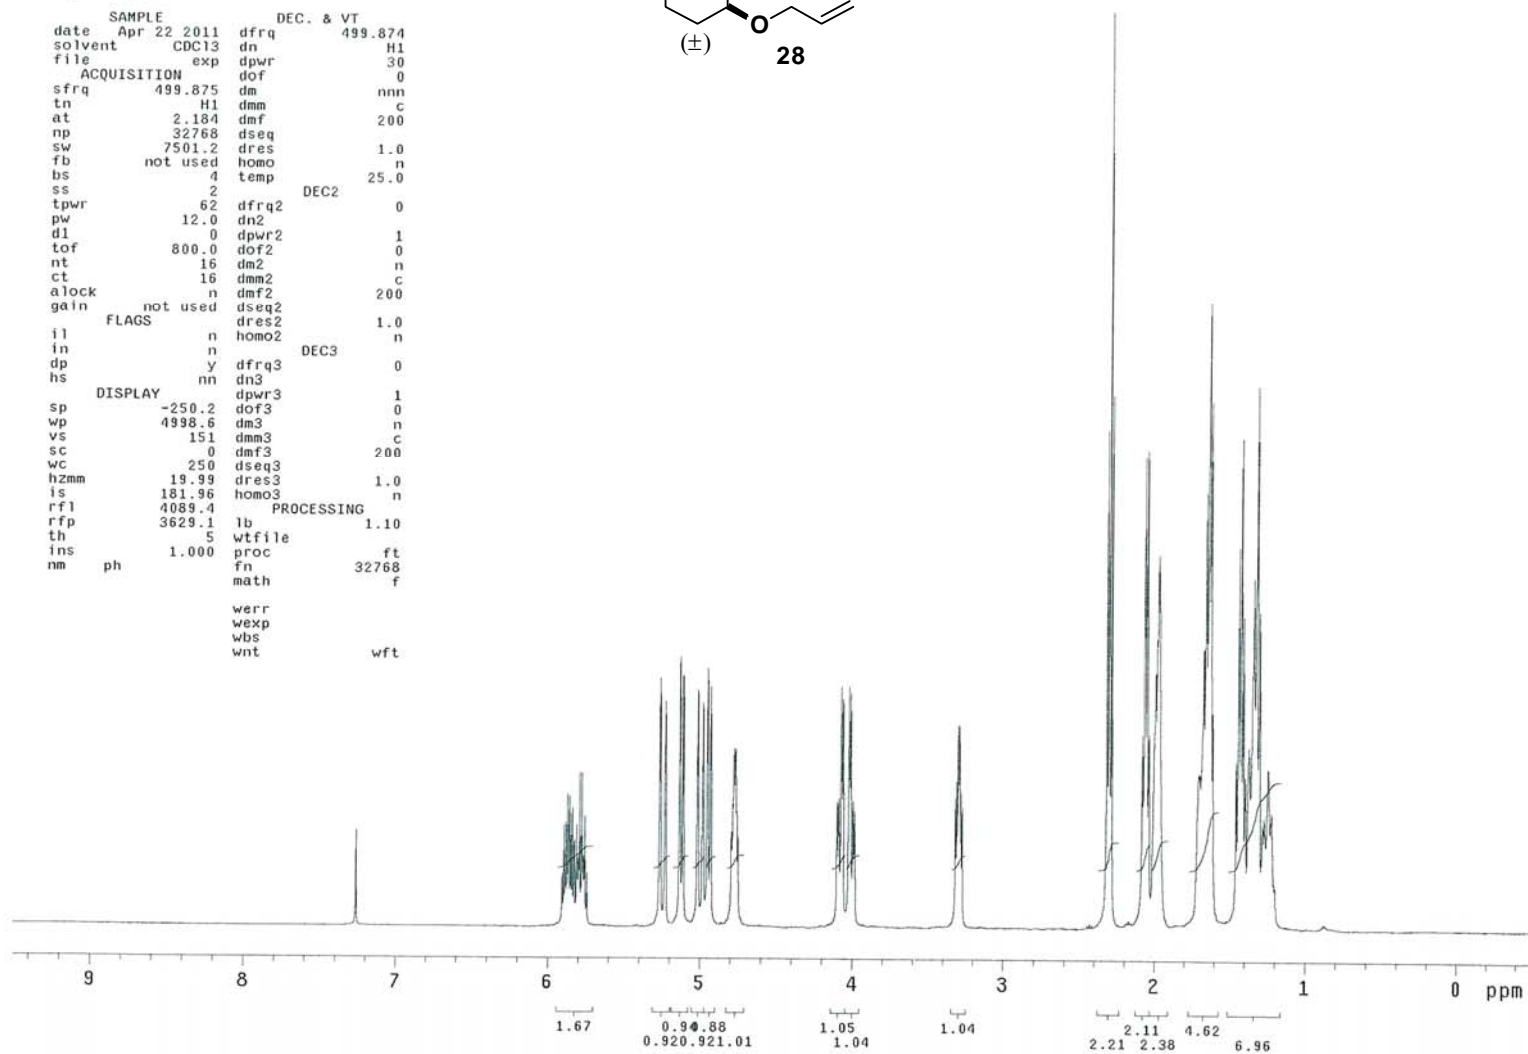

S184



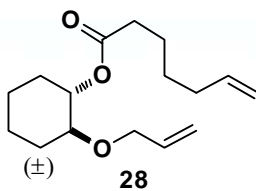

WYKELN10043\_13C

exp2 s2pu1

|             |             |            |          |
|-------------|-------------|------------|----------|
| SAMPLE      |             | DEC. & VT  |          |
| date        | Apr 22 2011 | dfrq       | 499.874  |
| solvent     | CDC13       | dn         | H1       |
| file        | exp         | dpwr       | 48       |
| ACQUISITION |             | dof        | 0        |
| sfrq        | 125.707     | dm         | yyy      |
| tn          | C13         | dmm        | w        |
| at          | 1.092       | dmf        | 8929     |
| np          | 65536       | dseq       |          |
| sw          | 29996.3     | dres       | 1.0      |
| fb          | not used    | homo       | n        |
| bs          | 16          | temp       | 25.0     |
| tpwr        | 55          | DEC2       |          |
| pw          | 4.8         | dfrq2      | 0        |
| d1          | 0           | dn2        |          |
| tof         | 2000.0      | dpwr2      | 1        |
| nt          | 9999        | dof2       | 0        |
| ct          | 192         | dm2        | n        |
| alock       | n           | dmm2       | c        |
| gain        | not used    | dmf2       | 10000    |
| FLAGS       |             | dseq2      |          |
| il          | n           | dres2      | 1.0      |
| in          | n           | homo2      | n        |
| dp          | y           | DEC3       |          |
| hs          | nn          | dfrq3      | 0        |
| DISPLAY     |             | dn3        |          |
| sp          | -1089.7     | dpwr3      | 1        |
| wp          | 29995.3     | dof3       | 0        |
| vs          | 47          | dm3        | n        |
| sc          | 0           | dmm3       | c        |
| wc          | 250         | dmf3       | 10000    |
| hzmm        | 119.98      | dseq3      |          |
| is          | 500.00      | dres3      | 1.0      |
| rfl         | 1090.6      | homo3      | n        |
| rfp         | 0           | PROCESSING |          |
| th          | 3           | lb         | 1.00     |
| ins         | 100.000     | wtfile     |          |
| nm          | cdc ph      | proc       | ft       |
|             |             | fn         | not used |
|             |             | math       | f        |

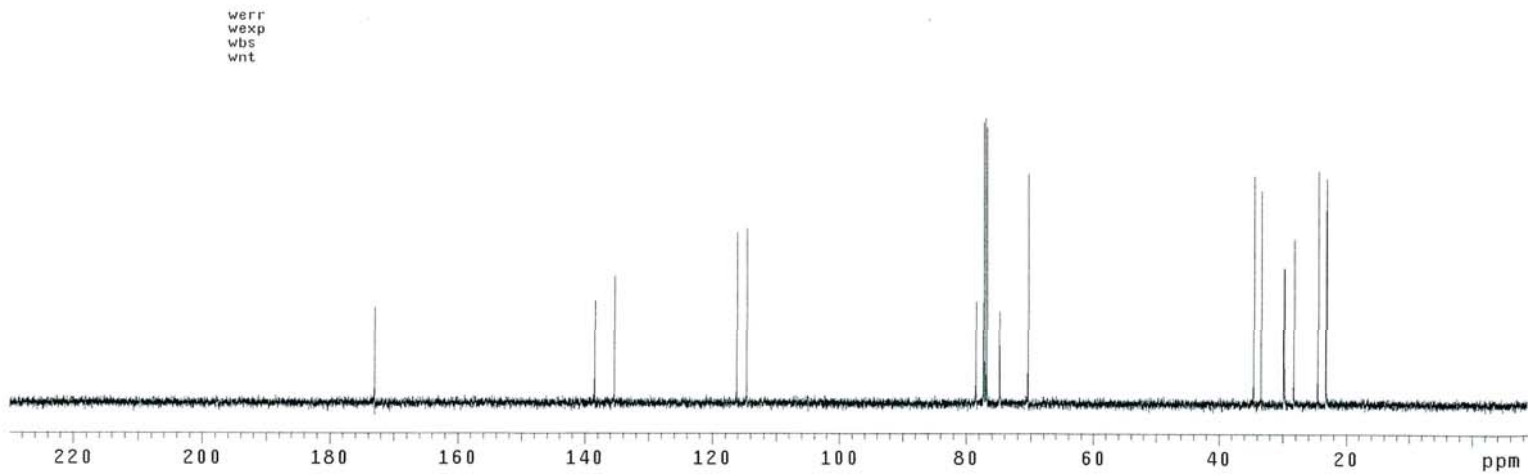

S185

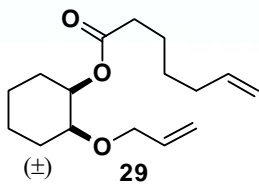

```

WVKELN10041_1H
expl s2pu1
SAMPLE          DEC. & VT
date Apr 22 2011 dfrq      499.874
solvent CDC13      dn       H1
file exp          dpwr     30
ACQUISITION    dof       0
sfrq 499.875     dm        nmh
tn    H1         dmm       c
at    2.184     dmf       200
np    32768    dseq      n
sw    7501.2   dres      1.0
fb    not used homo      n
bs    4        temp     25.0
ss    2
tpwr  62      DEC2      0
pw    12.0    dn2       1
dl    0      dpwr2     1
tof   800.0  dof2       0
nt    16     dm2       n
ct    16     dmm2      c
alock  n     dmf2     200
gain  not used dseq2    1.0
      FLAGS   dres2    n
il    n      homo2    n
in    n      DEC3      0
dp    y      dfrq3    1
hs    nn     dn3       1
      DISPLAY dpwr3    0
sp    -250.2 dof3     n
wp    4998.6 dm3      c
vs    151    dmm3     200
sc    0      dmf3     1.0
wc    250    dseq3    n
hzmm  19.99 dres3    n
is    153.15 homo3    n
rfl   4089.8 PROCESSING
rfp   3629.1 lb        1.10
th    2      wfile
ins   1.000  proc      ft
nm    ph     fn       32768
      math      f
      werr
      wexp
      wbs
      wnt      wft

```

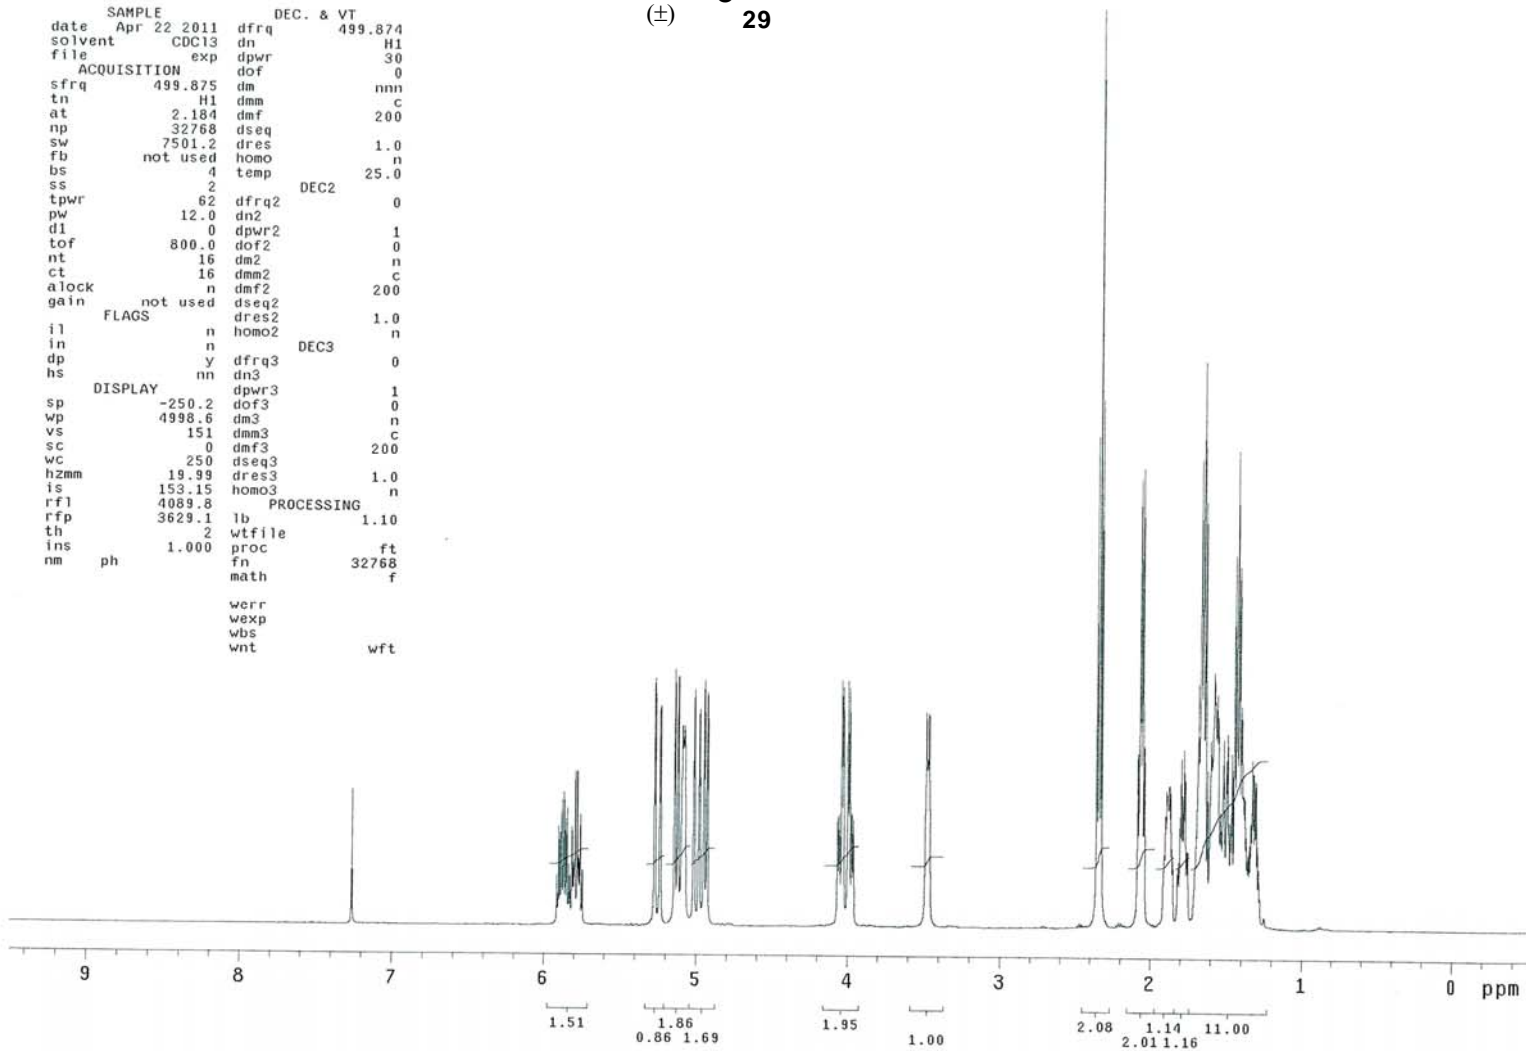

WYKELN10041\_13C

exp2 s2pu1

```
SAMPLE          DEC. & VT
date Apr 22 2011 dfrq          499.874
solvent CDC13    dn            H1
file exp        dpwr         48
ACQUISITION    dof           0
sfrq 125.707    dm            yyy
tn C13          dmm           w
at 1.092        dmf          8929
np 65536        dseq
sw 29996.3      dres          1.0
fb not used     homo          n
bs 16          temp          25.0
tpwr 55        DEC2
pw 4.8         dfrq2         0
d1 0           dn2
tof 2000.0     dpwr2         1
nt 9999        dof2          0
ct 384         dm2           n
alock n        dmm2          c
gain not used  dmf2         10000
FLAGS          dseq2
il n           dres2         1.0
in n           homo2        n
dp y           DEC3
hs nn          dfrq3         0
DISPLAY        dn3
sp -1088.7     dpwr3         1
wp 29995.3    dof3          0
vs 47         dm3           n
sc 0          dmm3          c
wc 250        dmf3         10000
hzmm 119.98   dseq3
is 500.00     dres3         1.0
rfl 10768.0   homo3         n
rfp 9678.3    PROCESSING
th 3          lb            1.00
ins 100.000   wtfile
nm cdc ph    proc          ft
              fn            not used
              math         f
              werr
              wexp
              wbs
              wnt
```

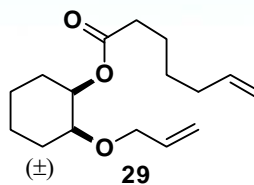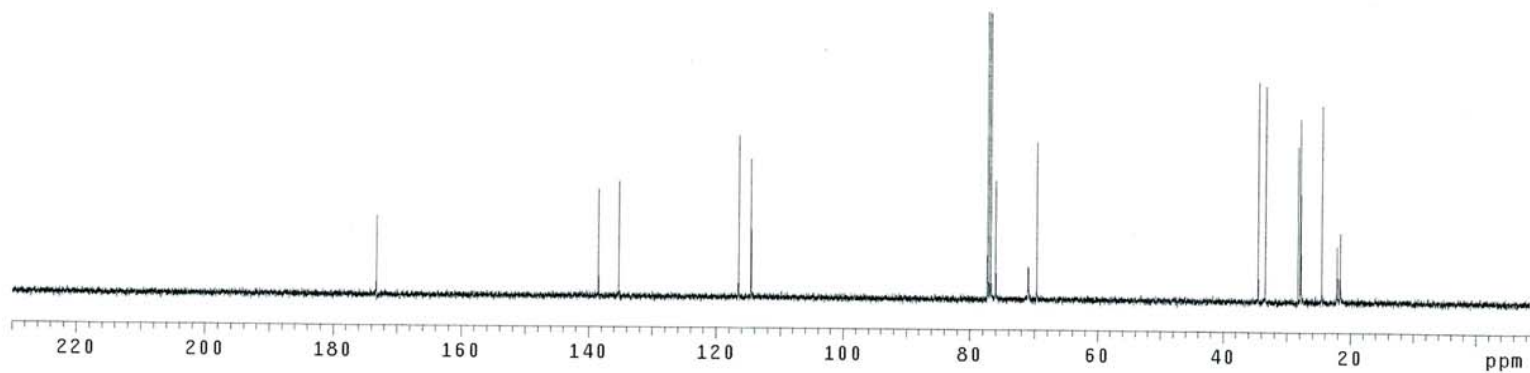

S187

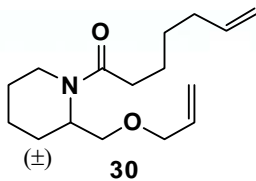

WYKELN10052\_1H

exp1 s2pu1

| SAMPLE      |             | DEC. & VT  |         |
|-------------|-------------|------------|---------|
| date        | Apr 23 2011 | dfrq       | 499.874 |
| solvent     | CDC13       | dn         | H1      |
| file        |             | dpwr       | 30      |
| ACQUISITION |             | dof        | 0       |
| sfrq        | 499.875     | dm         | nmn     |
| tn          | H1          | dmm        | c       |
| at          | 2.184       | dmf        | 200     |
| np          | 32768       | dseq       |         |
| sw          | 7501.2      | dres       | 1.0     |
| fb          | not used    | homo       | n       |
| bs          | 4           | temp       | 25.0    |
| ss          | 2           |            |         |
| tpwr        | 62          | dfrq2      | 0       |
| pw          | 12.0        | dn2        |         |
| d1          | 0           | dpwr2      | 1       |
| tof         | 800.0       | dof2       | 0       |
| nt          | 16          | dm2        | n       |
| ct          | 16          | dmm2       | c       |
| alock       | n           | dmf2       | 200     |
| gain        | not used    | dseq2      |         |
| FLAGS       |             | dres2      | 1.0     |
| il          | n           | homo2      | n       |
| in          | n           |            |         |
| dp          | y           | dfrq3      | 0       |
| hs          | nn          | dn3        |         |
| DISPLAY     |             | dpwr3      | 1       |
| sp          | 428.3       | dof3       | 0       |
| wp          | 3258.9      | dm3        | n       |
| vs          | 71          | dmm3       | c       |
| sc          | 0           | dmf3       | 200     |
| wc          | 250         | dseq3      |         |
| h2mm        | 13.04       | dres3      | 1.0     |
| is          | 210.92      | homo3      | n       |
|             |             | PROCESSING |         |
| rfl         | 4089.8      | lb         | 1.10    |
| rfp         | 3629.1      | wtfile     |         |
| th          | 3           | proc       | ft      |
| ins         | 2.000       | fn         | 32768   |
| nm          | ph          | math       | f       |
|             |             | werr       |         |
|             |             | wexp       |         |
|             |             | wbs        |         |
|             |             | wnt        | wft     |

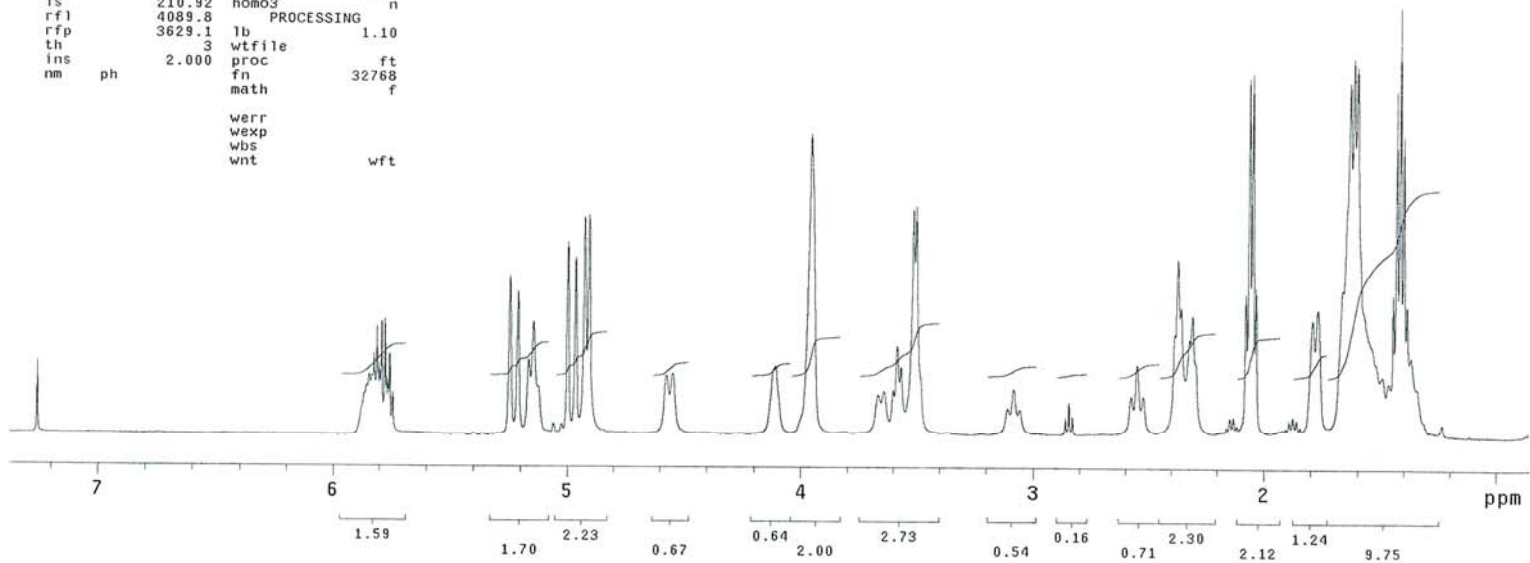

S188

WYKELN10052\_13C

exp2 s2pu1

| SAMPLE      |             | DEC. & VT  |          |
|-------------|-------------|------------|----------|
| date        | Apr 23 2011 | dfrq       | 499.874  |
| solvent     | CDC13       | dn         | H1       |
| file        | exp         | dpwr       | 48       |
| ACQUISITION |             |            |          |
| sfrq        | 125.707     | dm         | yyy      |
| tn          | C13         | dmm        | w        |
| at          | 1.092       | dmf        | 8929     |
| np          | 65536       | dseq       |          |
| sw          | 29996.3     | dres       | 1.0      |
| fb          | not used    | homo       | n        |
| bs          | 16          | temp       | 25.0     |
| tpwr        | 55          | DEC2       |          |
| pw          | 4.8         | dfrq2      | 0        |
| d1          | 0           | dn2        |          |
| tof         | 2000.0      | dpwr2      | 1        |
| nt          | 99999       | dof2       | 0        |
| ct          | 288         | dm2        | n        |
| alock       | n           | dmm2       | c        |
| gain        | not used    | dmf2       | 10000    |
| FLAGS       |             |            |          |
| i1          | n           | dseq2      |          |
| in          | n           | dres2      | 1.0      |
| dp          | y           | homo2      | n        |
| hs          | nn          | DEC3       |          |
| DISPLAY     |             |            |          |
| sp          | -1092.4     | dfrq3      | 0        |
| wp          | 29995.3     | dn3        |          |
| vs          | 84          | dpwr3      | 1        |
| sc          | 0           | dof3       | 0        |
| wc          | 250         | dm3        | n        |
| hzmm        | 119.98      | dmm3       | c        |
| is          | 500.00      | dmf3       | 10000    |
| rfl         | 10771.7     | dseq3      |          |
| rffp        | 9678.3      | dres3      | 1.0      |
| th          | 3           | homo3      | n        |
| ins         | 100.000     | PROCESSING |          |
| nm          | cdc ph      | lb         | 1.00     |
|             |             | wfile      |          |
|             |             | proc       | ft       |
|             |             | fn         | not used |
|             |             | math       | f        |
|             |             | werr       |          |
|             |             | wexp       |          |
|             |             | wbs        |          |
|             |             | wnt        |          |

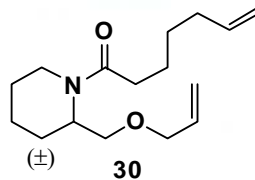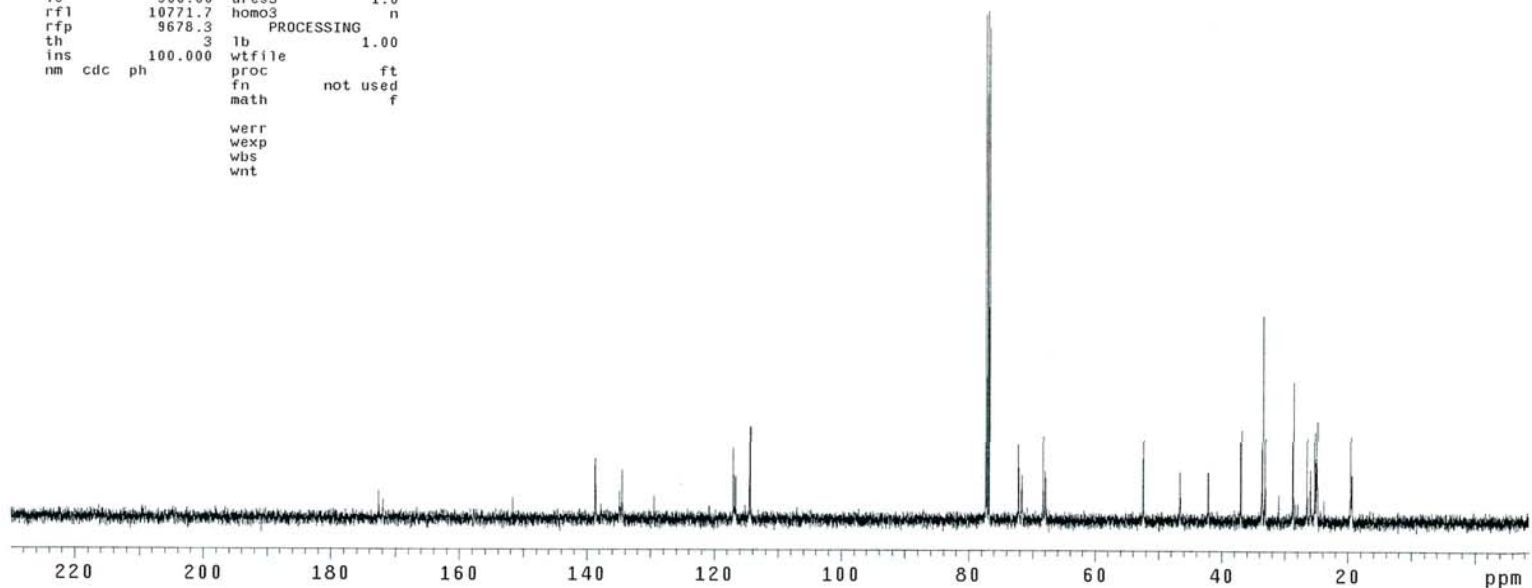

S189

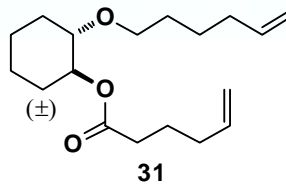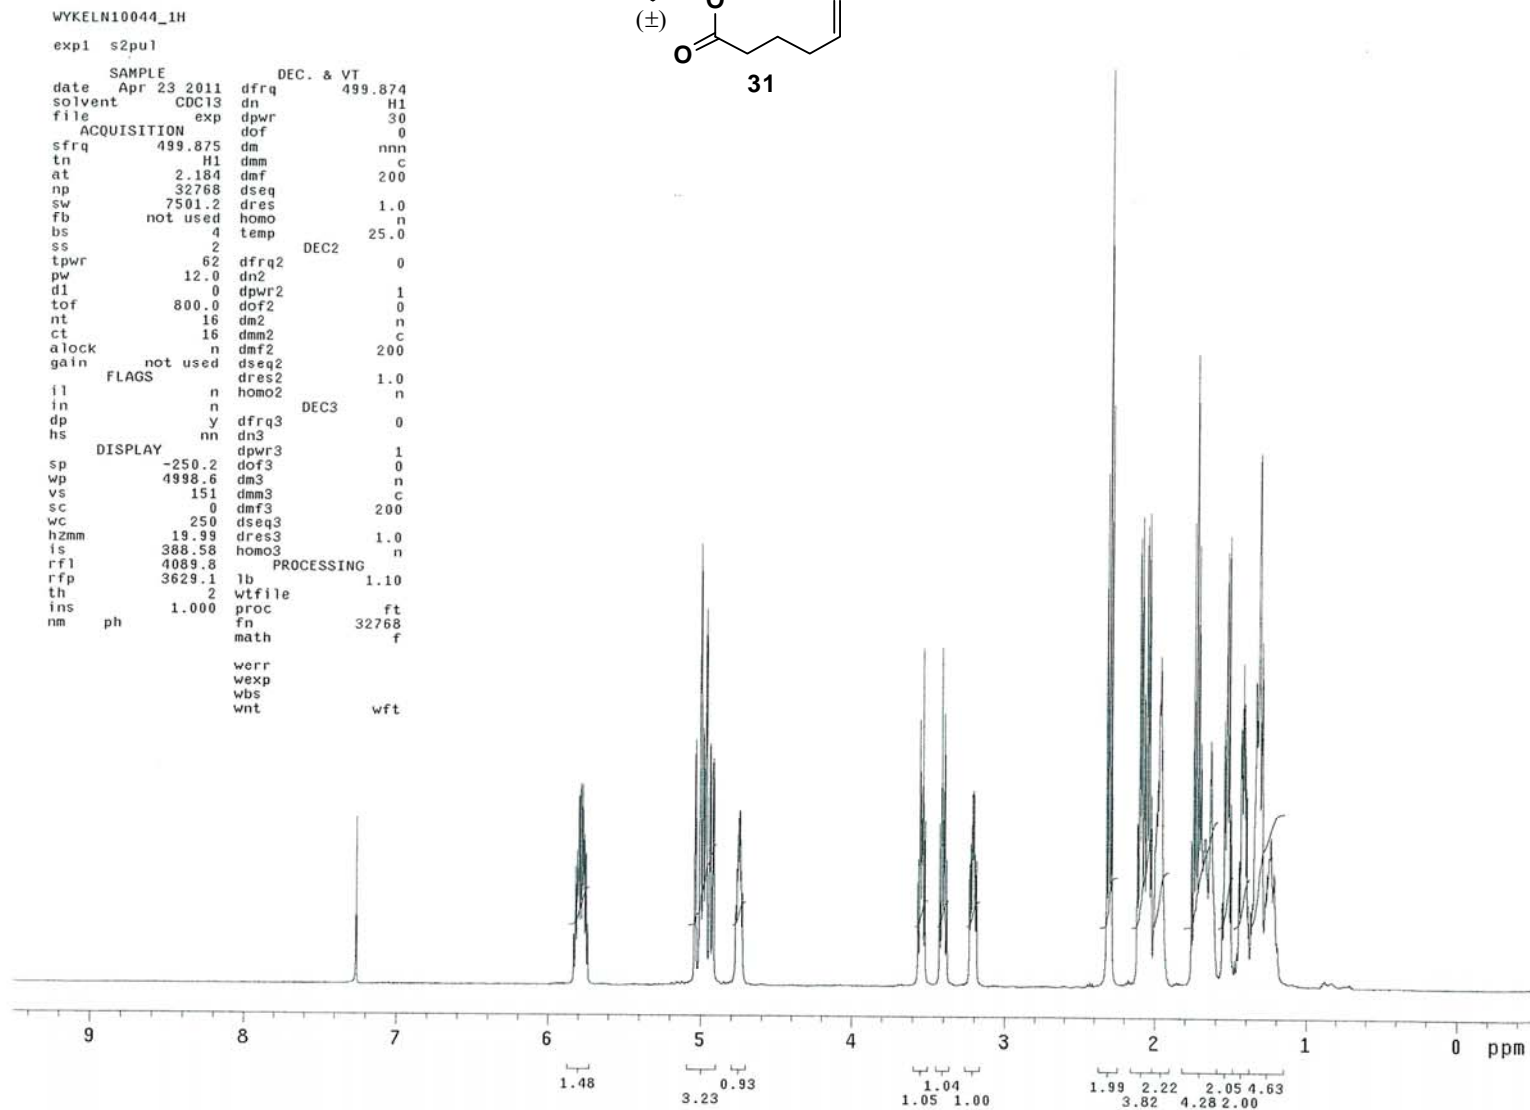

S190

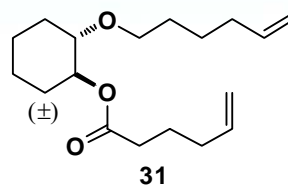

WYKELN10044\_13C

exp2 s2pu1

|             |             |            |          |
|-------------|-------------|------------|----------|
| date        | Apr 23 2011 | dfrq       | 499.874  |
| solvent     | CDC13       | dn         | H1       |
| file        | exp         | dpwr       | 48       |
| ACQUISITION |             |            |          |
| sfrq        | 125.707     | dm         | yyy      |
| tn          | C13         | dmm        | w        |
| at          | 1.092       | dmf        | 8929     |
| np          | 65536       | dseq       |          |
| sw          | 29996.3     | dres       | 1.0      |
| fb          | not used    | homo       | n        |
| bs          | 16          | temp       | 25.0     |
| tpwr        | 55          | DEC2       |          |
| pw          | 4.8         | dfrq2      | 0        |
| d1          | 0           | dn2        |          |
| tof         | 2000.0      | dpwr2      | 1        |
| nt          | 999         | dof2       | 0        |
| ct          | 192         | dm2        | n        |
| alock       | n           | dmm2       | c        |
| gain        | not used    | dmf2       | 10000    |
| FLAGS       |             |            |          |
| il          | n           | dres2      | 1.0      |
| in          | n           | homo2      | n        |
| dp          | y           | DEC3       |          |
| hs          | nn          | dfrq3      | 0        |
| DISPLAY     |             |            |          |
| sp          | -1088.7     | dn3        |          |
| wp          | 29995.3     | dpwr3      | 1        |
| vs          | 84          | dof3       | 0        |
| sc          | 0           | dm3        | n        |
| wc          | 250         | dmm3       | c        |
| hzmm        | 119.98      | dmf3       | 10000    |
| is          | 500.00      | dseq3      |          |
| rfl         | 10768.0     | dres3      | 1.0      |
| rfp         | 9678.3      | homo3      | n        |
| th          | 8           | PROCESSING |          |
| ins         | 100.000     | lb         | 1.00     |
| nm          | cdc ph      | wtfile     |          |
|             |             | proc       | ft       |
|             |             | fn         | not used |
|             |             | math       | f        |
|             |             | werr       |          |
|             |             | wexp       |          |
|             |             | wbs        |          |
|             |             | wnt        |          |

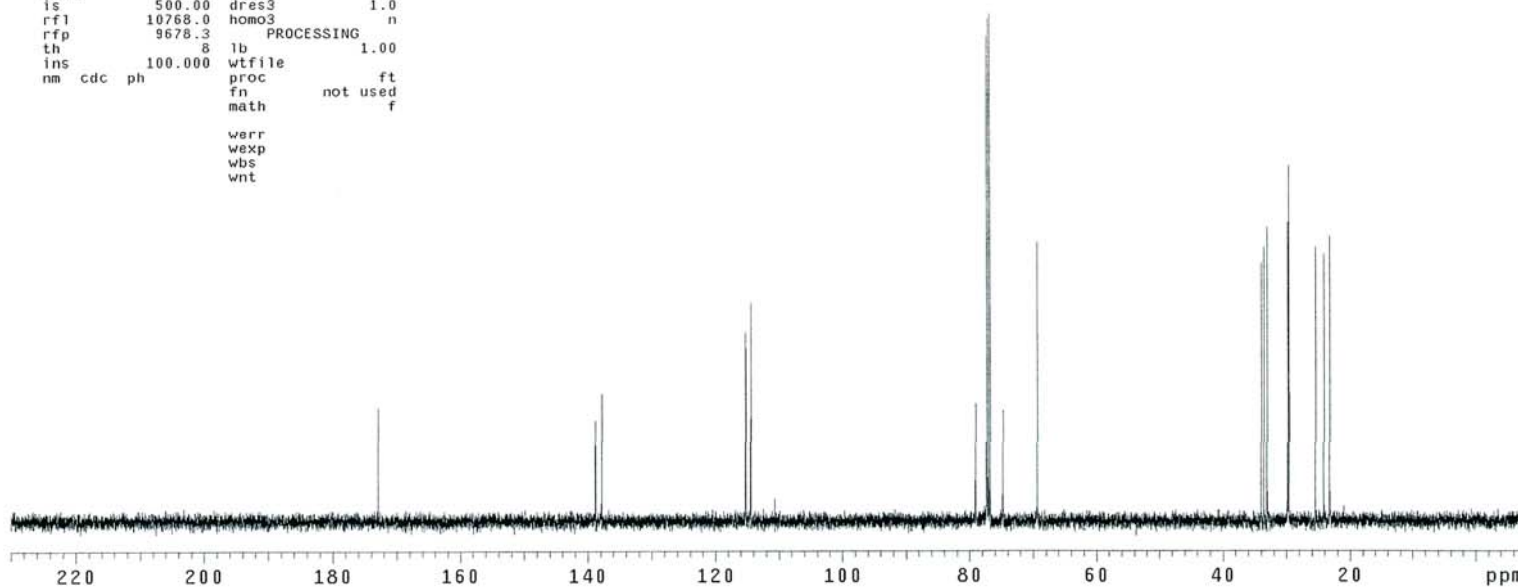

S191

WYKELN5009\_1H

expl s2pu1

```
SAMPLE          DEC. & VT
date   Oct 31 2009  dfrq   500.176
solvent CDC13      dn      H1
file   /export/home/~ dpwr   32
ds2/vnmrsys/data/i~ dof    0
500b/schreiber/WAN~ dm     nnn
G/WYKELN5009_1H.f1~ dmm    c
                        dmf   8770
ACQUISITION      dseq
sfrq   500.176     dres   1.0
tn      H1         homo   n
at      2.048      temp   23.0
np      32768      PROCESSING
sw      8000.0     lb      0.10
fb      4000      wtfile
bs      2          proc    ft
ss      2          fn      not used
tpwr   58         math    f
pw      5.0
d1      0         verr
lof     0         wexp
nt      64        wbs
ct      64        wnt
alock   n
gain    not used
        FLAGS
il      n
in      n
dp      y
hs      nn
        DISPLAY
sp      -250.1
vp      5001.5
vs      106
sc      0
vc      250
hzmm    20.01
fs      153.91
rf1     5131.3
rfp     3631.3
th      7
ins     2.000
nm      ph
```

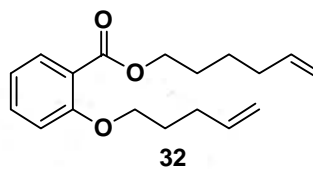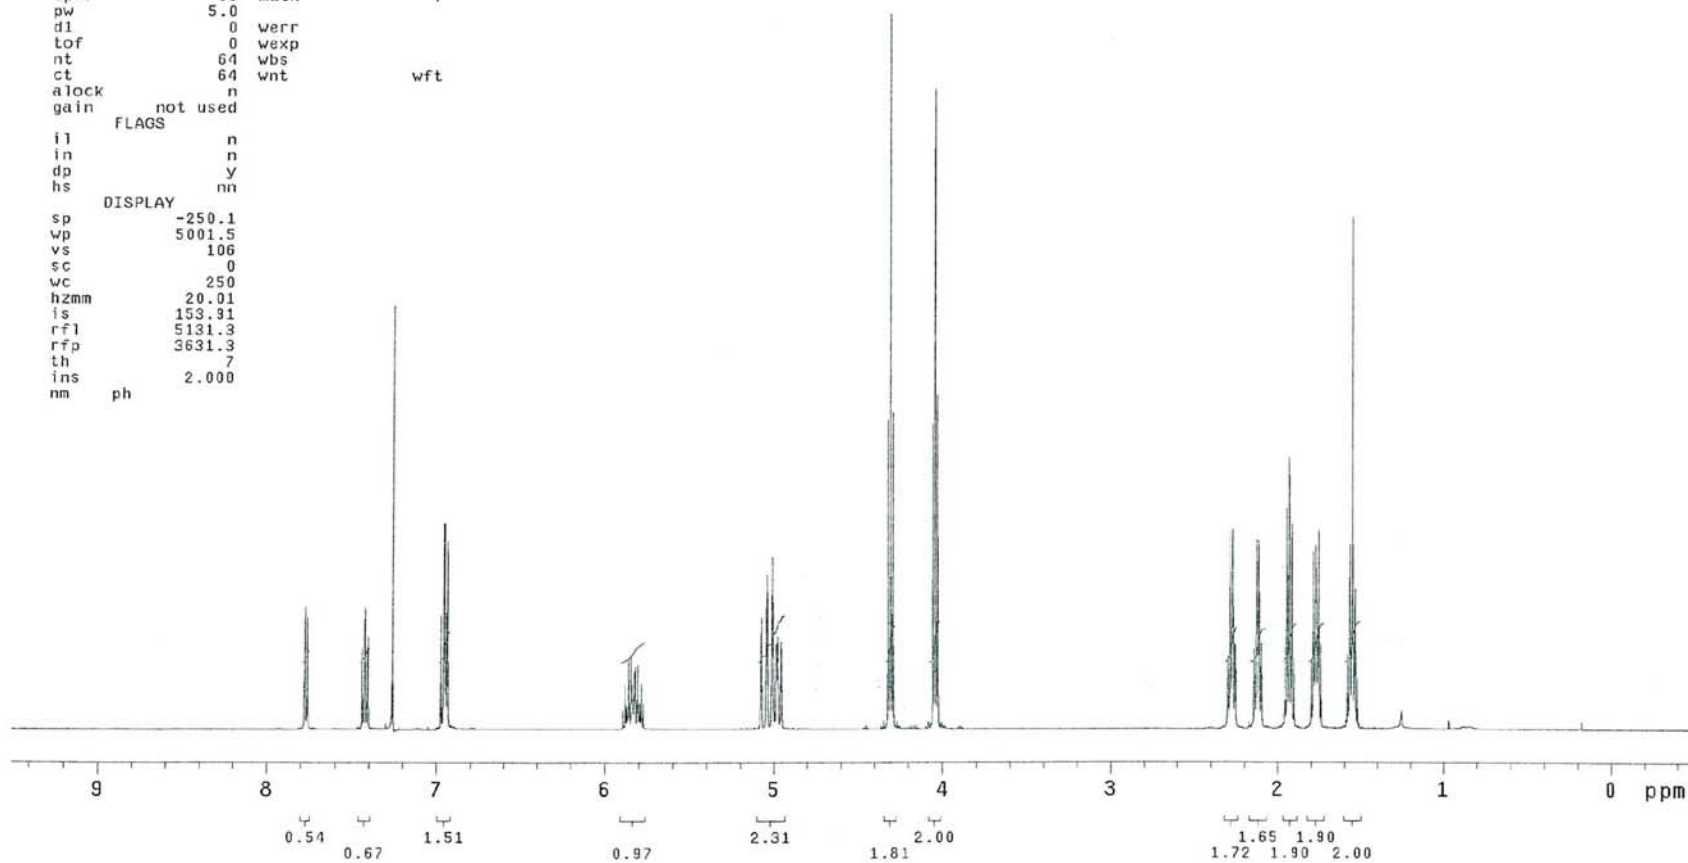

S192



WYKELN5009\_13C

exp2 s2pu1

```

SAMPLE
date Oct 31 2009 dfrq DEC. & VT 499.874
solvent CDC13 dn H1
file exp dpwr 49
ACQUISITION dof 0
sfrq 125.707 dm yyy
tn C13 dmm w
at 1.092 dmf 12000
np 65536 dseq
sw 29996.3 dres 1.0
fb not used homo n
bs 8 temp 25.0
tpwr 55 DEC2
pw 4.2 dfrq2 0
d1 0 dn2
tof 2000.0 dpwr2 1
nt 9999 dof2 0
ct 1368 dm2 n
alock n dmm2 c
gain not used dmf2 10000
FLAGS
i1 n dres2 1.0
in n homo2 n
dp y DEC3
hs nn dfrq3 0
DISPLAY dn3
sp -1088.7 dpwr3 1
wp 29995.3 dof3 0
vs 37 dm3 n
sc 0 dmm3 c
wc 250 dmf3 10000
hzmm 119.98 dseq3
is 500.00 dres3 1.0
rf1 10768.0 homo3 n
rfp 9678.3 PROCESSING
th 2 lb 1.00
ins 100.000 wtfile
nm cdc ph proc ft
not used fn
math f

werr
wexp
wbs
wnt
```

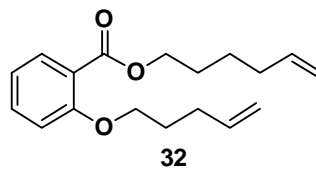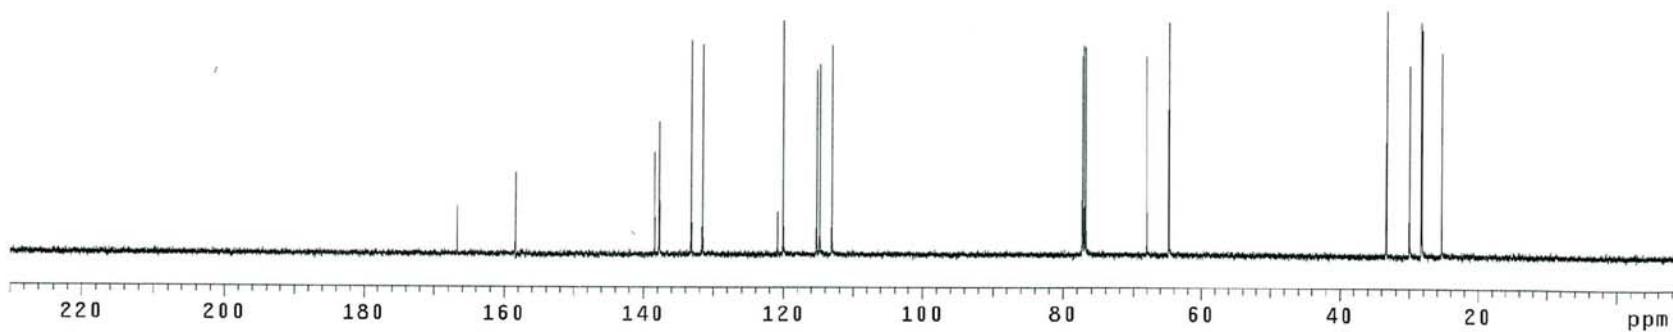

S193

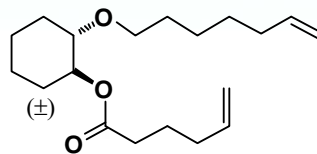

33

WYKELN10045\_1H

exp1 s2pu1

|             |             |            |         |
|-------------|-------------|------------|---------|
| SAMPLE      |             | DEC. & VT  |         |
| date        | Apr 23 2011 | dfrq       | 499.874 |
| solvent     | CDC13       | dn         | H1      |
| file        | exp         | dpwr       | 30      |
| ACQUISITION |             | dof        | 0       |
| sfrq        | 499.875     | dm         | nmn     |
| tn          | H1          | dmm        | c       |
| at          | 2.184       | dmf        | 200     |
| np          | 32768       | dseq       |         |
| sw          | 7501.2      | dres       | 1.0     |
| fb          | not used    | homo       | n       |
| bs          | 4           | temp       | 25.0    |
| ss          | 2           |            |         |
| tpwr        | 62          | dfrq2      | DEC2 0  |
| pw          | 12.0        | dn2        |         |
| d1          | 0           | dpwr2      | 1       |
| tof         | 800.0       | dof2       | 0       |
| nt          | 16          | dm2        | n       |
| ct          | 16          | dmm2       | c       |
| alock       | not used    | dmf2       | 200     |
| gain        | not used    | dseq2      |         |
| il          | FLAGS n     | dres2      | 1.0     |
| in          | n           | homo2      | DEC3 n  |
| dp          | y           | dfrq3      | 0       |
| hs          | nn          | dn3        |         |
| DISPLAY     |             | dpwr3      | 1       |
| sp          | -250.2      | dof3       | 0       |
| wp          | 4998.6      | dm3        | n       |
| vs          | 151         | dmm3       | c       |
| sc          | 0           | dmf3       | 200     |
| wc          | 250         | dseq3      |         |
| h2mm        | 19.99       | dres3      | 1.0     |
| ts          | 417.47      | homo3      | n       |
| rfl         | 4089.8      | PROCESSING |         |
| rfp         | 3629.1      | lb         | 1.10    |
| th          | 0           | wtfile     |         |
| ins         | 1.000       | proc       | ft      |
| nm          | ph          | fn         | 32768   |
|             |             | math       | f       |

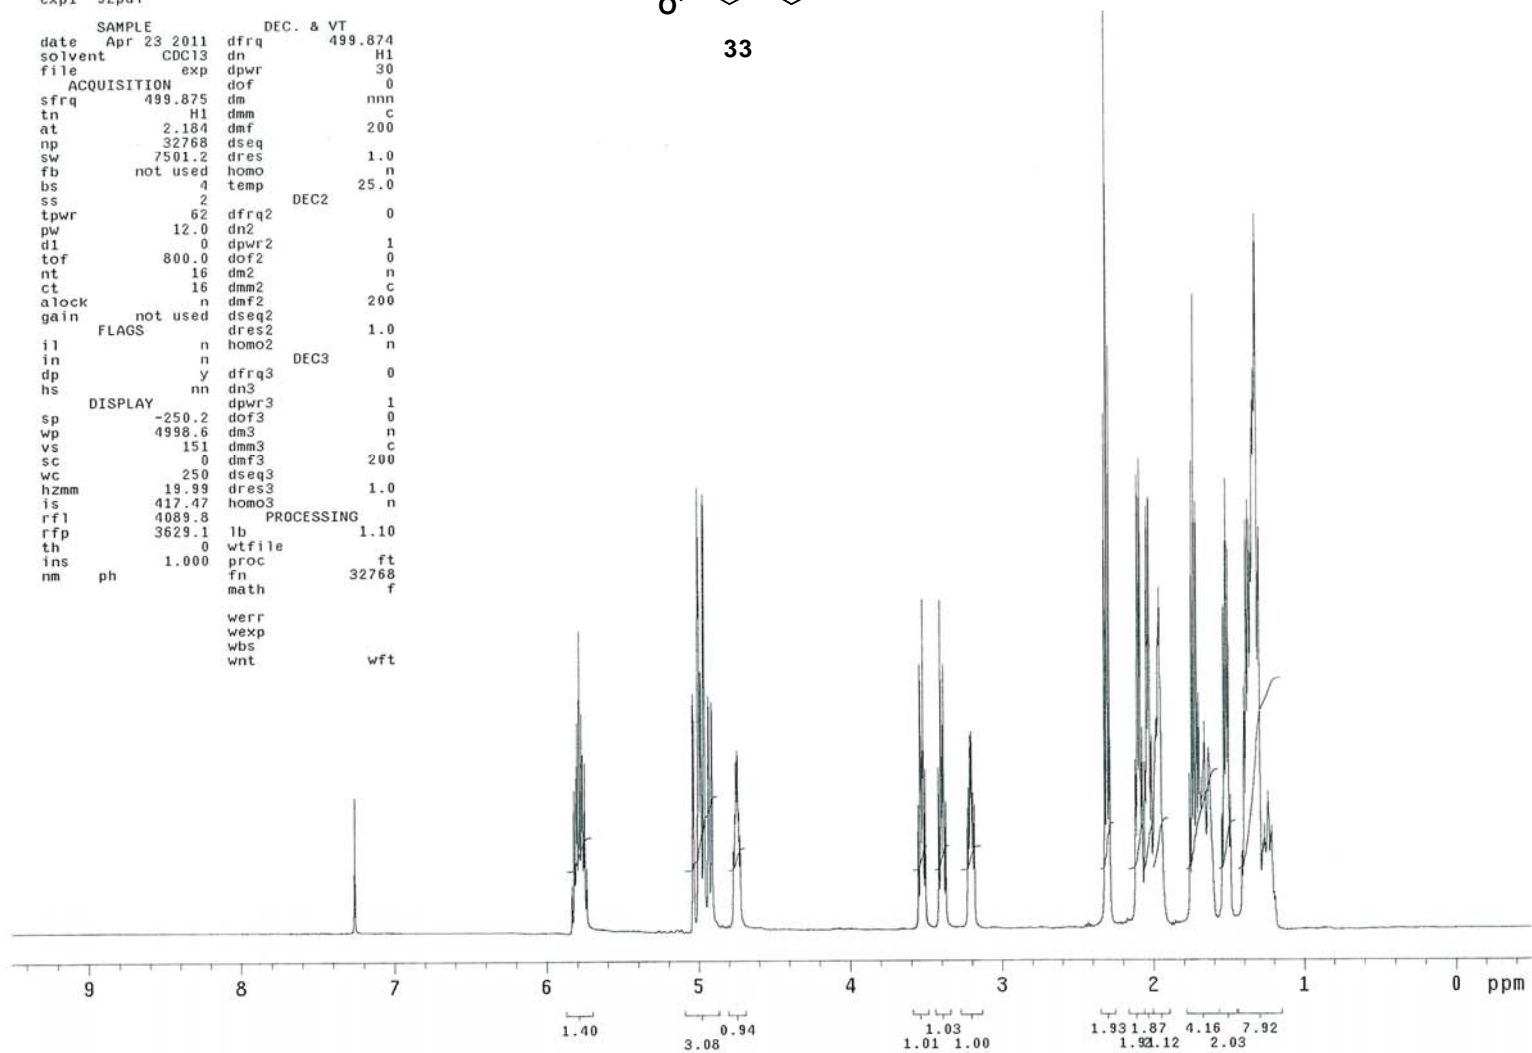

S194

WYKELN10045\_13C

exp2 s2pu1

| SAMPLE      |             | DEC. & VT  |          |
|-------------|-------------|------------|----------|
| date        | Apr 23 2011 | dfrq       | 499.874  |
| solvent     | CDC13       | dn         | H1       |
| file        | exp         | dpwr       | 48       |
| ACQUISITION |             |            |          |
| sfrq        | 125.707     | dm         | yyy      |
| tn          | C13         | dmm        | w        |
| at          | 1.092       | dmf        | 8929     |
| np          | 65536       | dseq       |          |
| sw          | 29996.3     | dres       | 1.0      |
| fb          | not used    | homo       | n        |
| bs          | 16          | temp       | 25.0     |
| tpwr        | 55          | DEC2       |          |
| pw          | 4.8         | dfrq2      | 0        |
| d1          | 0           | dn2        |          |
| tof         | 2000.0      | dpwr2      | 1        |
| nt          | 999         | dof2       | 0        |
| ct          | 160         | dm2        | n        |
| alock       | n           | dmm2       | c        |
| gain        | not used    | dof2       | 10000    |
| FLAGS       |             |            |          |
| il          | n           | dres2      | 1.0      |
| in          | n           | homo2      | n        |
| dp          | y           | DEC3       |          |
| hs          | nn          | dfrq3      | 0        |
| DISPLAY     |             |            |          |
| sp          | -1088.7     | dn3        |          |
| wp          | 29995.3     | dpwr3      | 1        |
| vs          | 84          | dof3       | 0        |
| sc          | 0           | dm3        | n        |
| wc          | 250         | dmm3       | c        |
| hzmm        | 119.98      | dof3       | 10000    |
| is          | 500.00      | dseq3      |          |
| rfl         | 10768.0     | dres3      | 1.0      |
| rfp         | 9678.3      | homo3      | n        |
| th          | 8           | PROCESSING |          |
| ins         | 100.000     | lb         | 1.00     |
| nm          | cdc ph      | wtfile     |          |
|             |             | proc       | ft       |
|             |             | fn         | not used |
|             |             | math       | f        |
|             |             | werr       |          |
|             |             | wexp       |          |
|             |             | wbs        |          |
|             |             | wnt        |          |

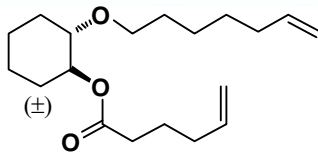

33

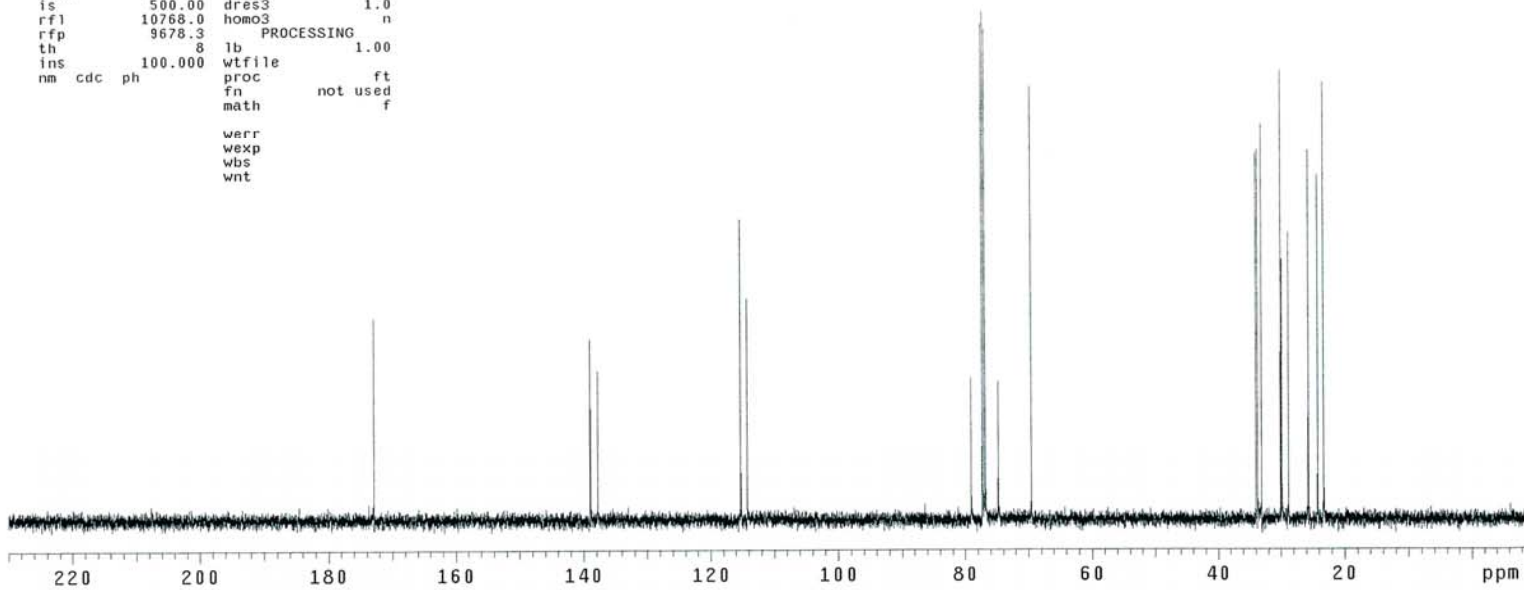

S195

WYKELN5011\_byProduct\_1H

exp1 s2pu1

```
SAMPLE          DEC. & VT
date    Nov  6 2009  dfrq    500.176
solvent  CDC13      dn      H1
file    /export/home/~ dpwr    32
ds2/vnmr/sys/data/~  dof     0
500b/schreiber/WAN~ dm      nnn
G/WYKELN5011_byPro~ dmm     c
duct_1H.fid      dmf     8770

ACQUISITION
sfrq    500.176  dres    1.0
tn      H1      homo    n
at      2.048   temp    23.0
np      32768
sw      8000.0  lb      0.10
fb      4000   wtfile
bs      8      proc    ft
ss      2      fn     not used
tpwr    58     math    f
pw      5.0
d1      0      verr
tof     0      wexp
nt      64     wbs
ct      64     wnt
alock   n
gain    not used

FLAGS
il      n
in      n
dp      y
hs      nn

DISPLAY
sp      -250.1
wp      5001.5
vs      65
sc      0
wc      250
hzmm    20.01
is      100.53
rf1     5131.3
rfp     3631.3
th      7
ins     2.000
nm      ph
```

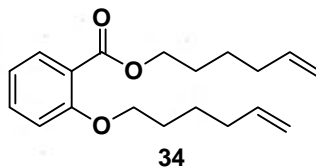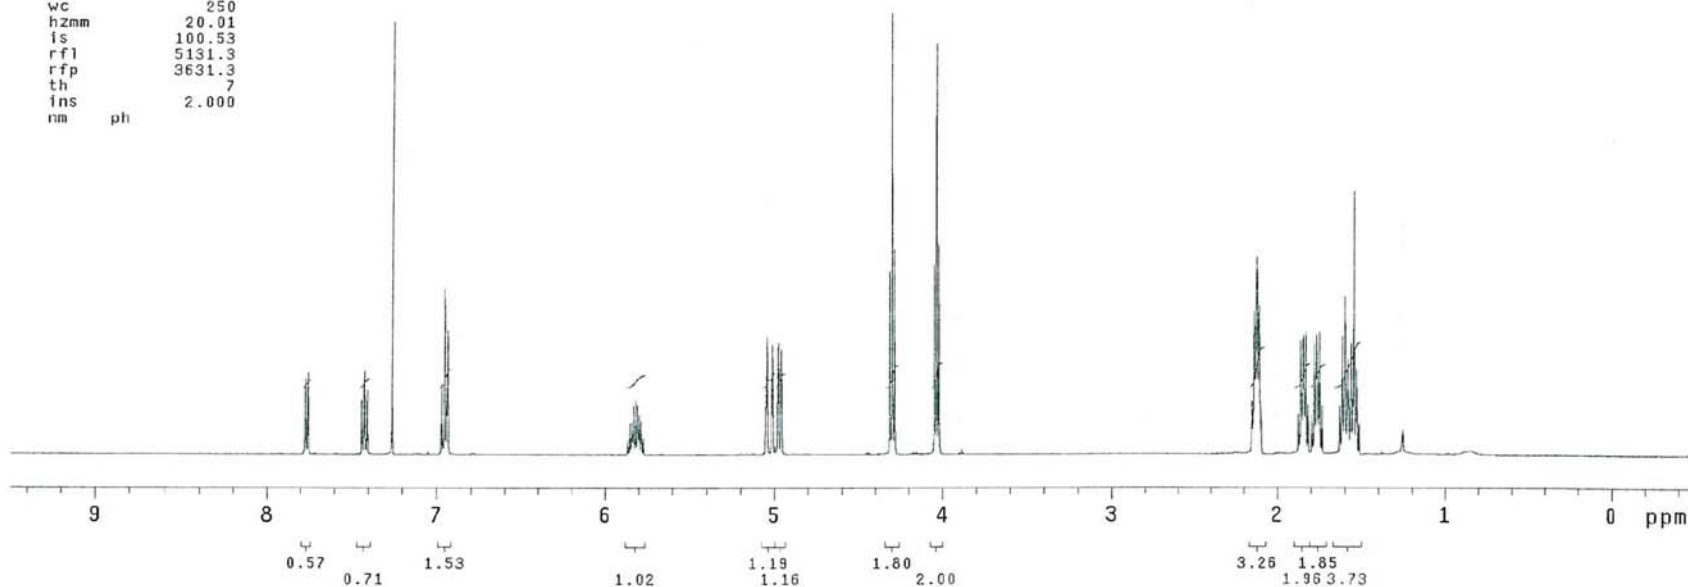

S196

WYKELN5011\_byProduct\_13C

exp2 s2pu1

```

SAMPLE          DEC. & VT
date Apr 30 2010 dfrq          499.874
solvent CDC13      dn          H1
file /export/home/~ dpwr         48
i500c/vnmrsys/data~ dof         0
/schreiber/WANG/Pu~ dm          yyy
b1/WYKELN5011_byPr~ dmm          w
oduct_13C.fid    dmf          10000
ACQUISITION
sfrq 125.707      dres          1.0
tn C13           homo          n
at 1.092         temp          25.0
np 65536         dfrq2         DEC2          0
sw 29996.3       dn2           1
fb not used      dpwr2         0
bs 32           dof2          n
tpwr 55          dm2           c
pw 4.2          dmm2          10000
d1 0           dmf2          10000
tof 2000.0      dseq2         1.0
nt 99999       dres2         n
ct 896         homo2         n
alock not used  dfrq3         DEC3          0
gain not used  dn3           1
          FLAGS  dpwr3         0
          dn3           0
          dpwr3         n
          dof3          n
          dm3           n
          dmm3          c
          dmf3          10000
          dseq3         1.0
          dres3         n
          homo3         n
          PROCESSING
          lb           1.00
          wtfile
          proc         ft
          fn          not used
          math         f
          werr
          wexp
          wbs
          wnt

```

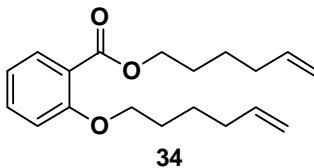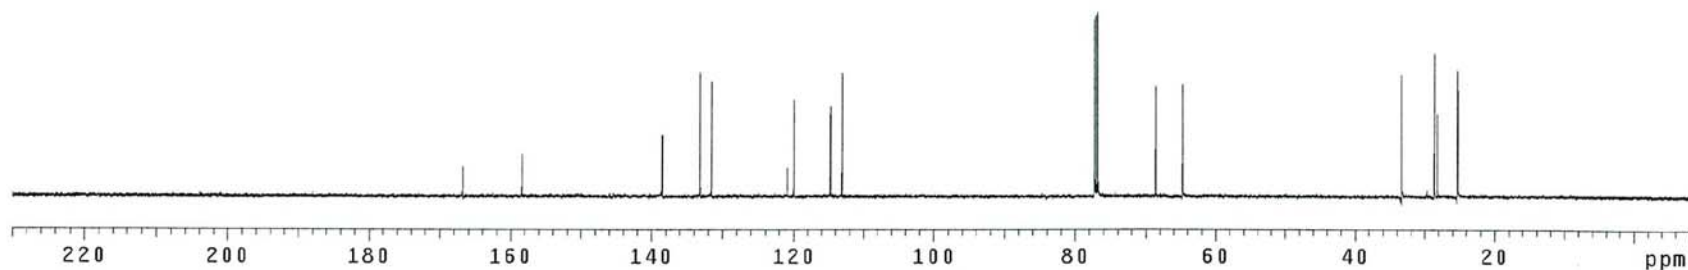

S197
